# Supplementary material for: Al and Zn phenoxy-amidine complexes for lactide ROP catalysis
Source: Royal Society of Chemistry journal article supplement (doi:10.1039/d3dt01216f), 2023-01-01
Supplement: d3dt01216f1.pdf [file d3dt01216f1.pdf]

Supporting information for

## Al and Zn phenoxy-amidine complexes for lactide ROP catalysis

Benjamin Théron,<sup>a</sup> Valentin Vaillant-Coindard,<sup>a</sup> Cédric Balan,<sup>a</sup> Yoann Rousselin,<sup>a</sup>  
Jérôme Bayardon,<sup>a</sup> Raluca Malacea Kabbara<sup>a</sup> and Pierre Le Gendre\*<sup>a</sup>

<sup>a</sup>Institut de Chimie Moléculaire de l'Université de Bourgogne (ICMUB, UMR-CNRS 6302), Université de Bourgogne

### Contents

|                                                                                                                |     |
|----------------------------------------------------------------------------------------------------------------|-----|
| <i><sup>1</sup>H, {<sup>1</sup>H}<sup>13</sup>C, COSY, HSQC and HMBC NMR spectra of <b>L1H</b></i>             | S2  |
| <i><sup>1</sup>H, {<sup>1</sup>H}<sup>13</sup>C, COSY, HSQC and HMBC NMR spectra of <b>L2H</b></i>             | S4  |
| <i><sup>1</sup>H, {<sup>1</sup>H}<sup>13</sup>C, COSY, HSQC and HMBC NMR spectra of <b>L3H</b></i>             | S7  |
| <i><sup>1</sup>H, {<sup>1</sup>H}<sup>13</sup>C, COSY, HSQC and HMBC NMR spectra of <b>L4H</b></i>             | S9  |
| <i><sup>1</sup>H, {<sup>1</sup>H}<sup>13</sup>C, COSY, HSQC and HMBC NMR spectra of <b>L5H</b></i>             | S12 |
| <i><sup>1</sup>H, {<sup>1</sup>H}<sup>13</sup>C, COSY, HSQC and HMBC NMR spectra of <b>L6H</b></i>             | S14 |
| <i><sup>1</sup>H, {<sup>1</sup>H}<sup>13</sup>C, HSQC and HMBC NMR spectra of <b>1a</b></i>                    | S17 |
| <i><sup>1</sup>H, {<sup>1</sup>H}<sup>13</sup>C, HSQC and HMBC NMR spectra of <b>1b</b></i>                    | S19 |
| <i><sup>1</sup>H, {<sup>1</sup>H}<sup>13</sup>C, HSQC and HMBC NMR spectra of <b>2b</b></i>                    | S22 |
| <i><sup>1</sup>H, {<sup>1</sup>H}<sup>13</sup>C, HSQC, HMBC and VT <sup>1</sup>H NMR spectra of <b>3b</b></i>  | S24 |
| <i><sup>1</sup>H, {<sup>1</sup>H}<sup>13</sup>C, HSQC and HMBC NMR spectra of <b>4b</b></i>                    | S28 |
| <i><sup>1</sup>H, {<sup>1</sup>H}<sup>13</sup>C, HSQC and HMBC NMR spectra of <b>6b</b></i>                    | S31 |
| <i><sup>1</sup>H, {<sup>1</sup>H}<sup>13</sup>C, HSQC and HMBC NMR spectra of <b>1b'</b></i>                   | S33 |
| <i><sup>1</sup>H, {<sup>1</sup>H}<sup>13</sup>C, HSQC and HMBC NMR spectra of <b>1c</b></i>                    | S36 |
| <i><sup>1</sup>H, {<sup>1</sup>H}<sup>13</sup>C, HSQC and HMBC NMR spectra of <b>2c</b></i>                    | S38 |
| <i><sup>1</sup>H, {<sup>1</sup>H}<sup>13</sup>C, HSQC and HMBC NMR spectra of <b>5c</b></i>                    | S41 |
| <i><sup>1</sup>H, {<sup>1</sup>H}<sup>13</sup>C, HSQC and HMBC NMR spectra of <b>6c</b></i>                    | S43 |
| <i><sup>1</sup>H, {<sup>1</sup>H}<sup>13</sup>C, HSQC and HMBC NMR spectra of <b>1d</b></i>                    | S46 |
| <i><sup>1</sup>H, {<sup>1</sup>H}<sup>13</sup>C, HSQC and HMBC NMR spectra of <b>2d</b></i>                    | S47 |
| <i><sup>1</sup>H, {<sup>1</sup>H}<sup>13</sup>C and VT <sup>1</sup>H NMR spectra of <b>3d</b></i>              | S50 |
| <i><sup>1</sup>H, {<sup>1</sup>H}<sup>13</sup>C and VT <sup>1</sup>H NMR spectra of <b>4d</b></i>              | S52 |
| <i><sup>1</sup>H, {<sup>1</sup>H}<sup>13</sup>C and VT <sup>1</sup>H NMR spectra of <b>5d</b></i>              | S53 |
| <i><sup>1</sup>H, {<sup>1</sup>H}<sup>13</sup>C, HSQC and HMBC NMR spectra of <b>6d</b></i>                    | S55 |
| <i>DOSY NMR spectra of <b>1a</b> and <b>1c</b></i>                                                             | S57 |
| <i>Experimental procedure for the synthesis of <b>7d</b></i>                                                   | S59 |
| <i>Polymer characterization</i>                                                                                | S60 |
| <i>X-ray data for compounds <b>L1H, L3H, L4H, L5H, 1a, 1b, 1b', 2b, 3b, 1c, 5c, 6c, 1d, 2d, 3d, 4d, 6d</b></i> | S63 |

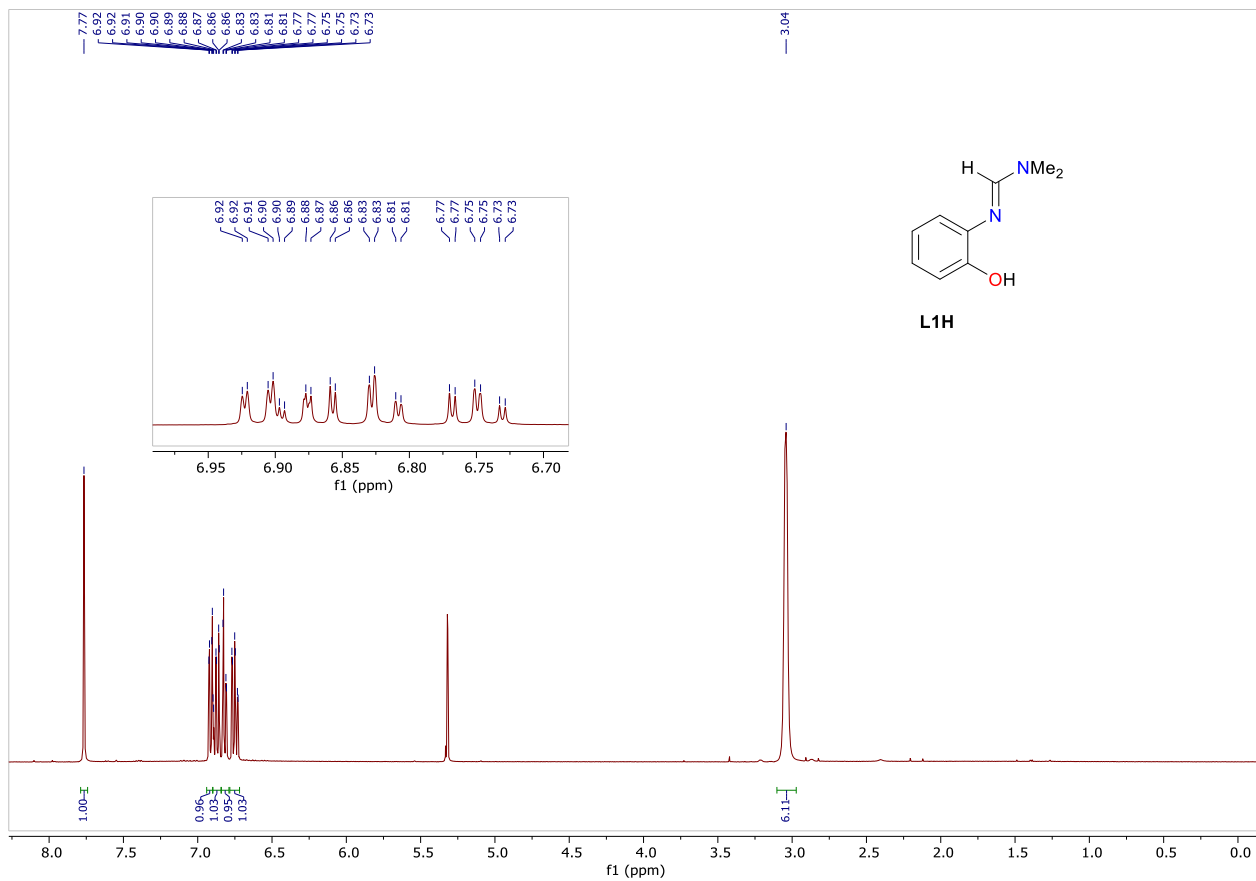

Figure S1 <sup>1</sup>H NMR (400 MHz, CD<sub>2</sub>Cl<sub>2</sub>, 298 K) of *N'*-(2-hydroxyphenyl)-*N,N*-dimethylformamide **L1H**.

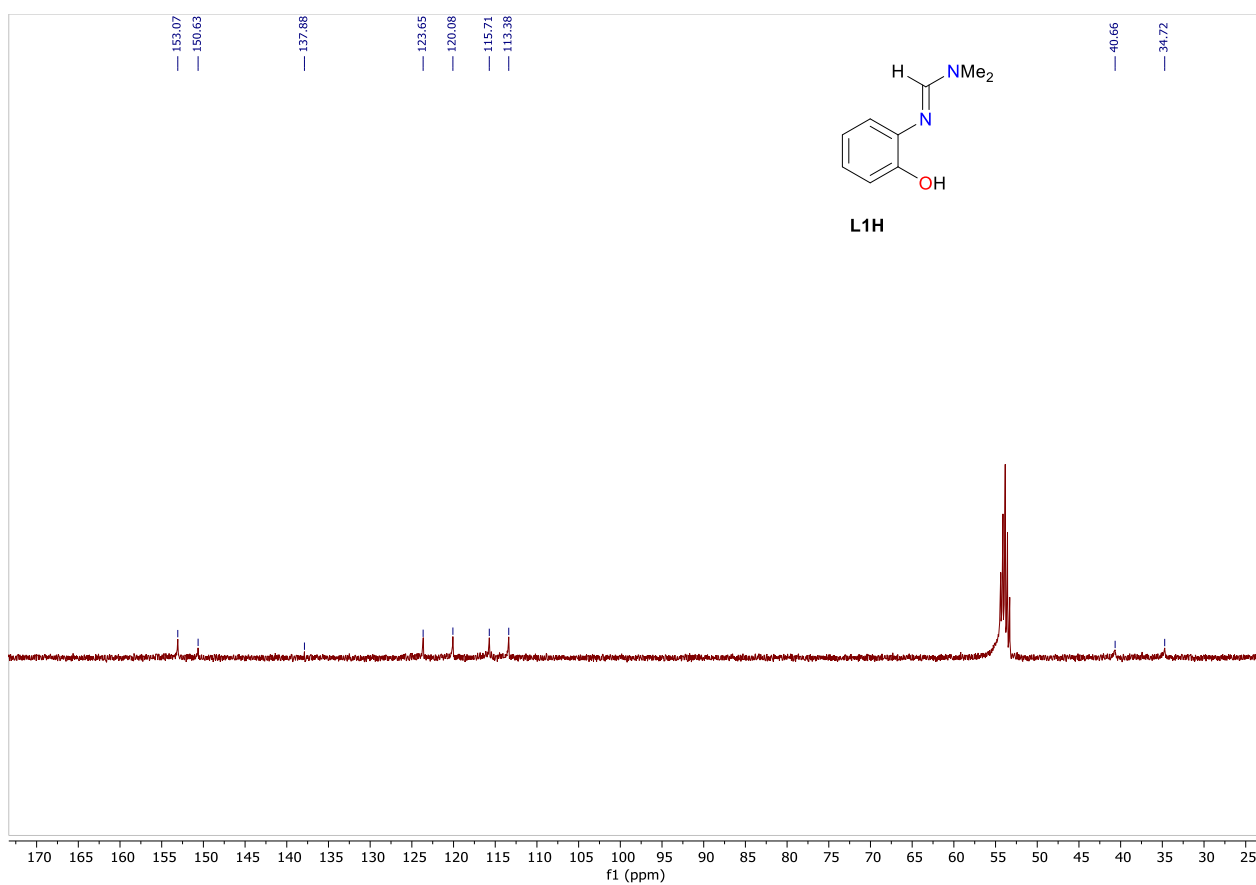

Figure S2 <sup>1</sup>H<sup>13</sup>C NMR (101 MHz, CD<sub>2</sub>Cl<sub>2</sub>, 298 K) of *N'*-(2-hydroxyphenyl)-*N,N*-dimethylformamide **L1H**.

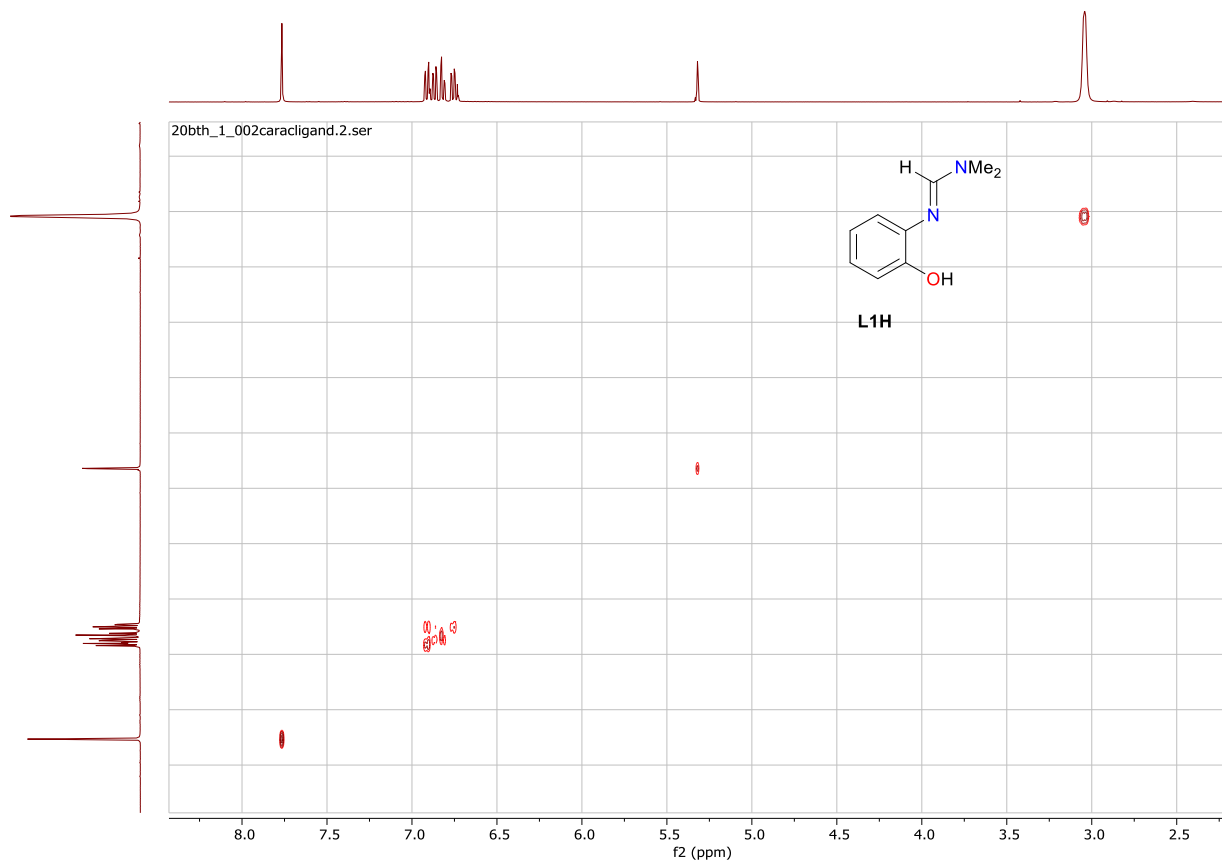

Figure S3  $^1\text{H}$   $^1\text{H}$  COSY (400 MHz,  $\text{CD}_2\text{Cl}_2$ , 298 K) of *N'*-(2-hydroxyphenyl)-*N,N*-dimethylformamide **L1H**.

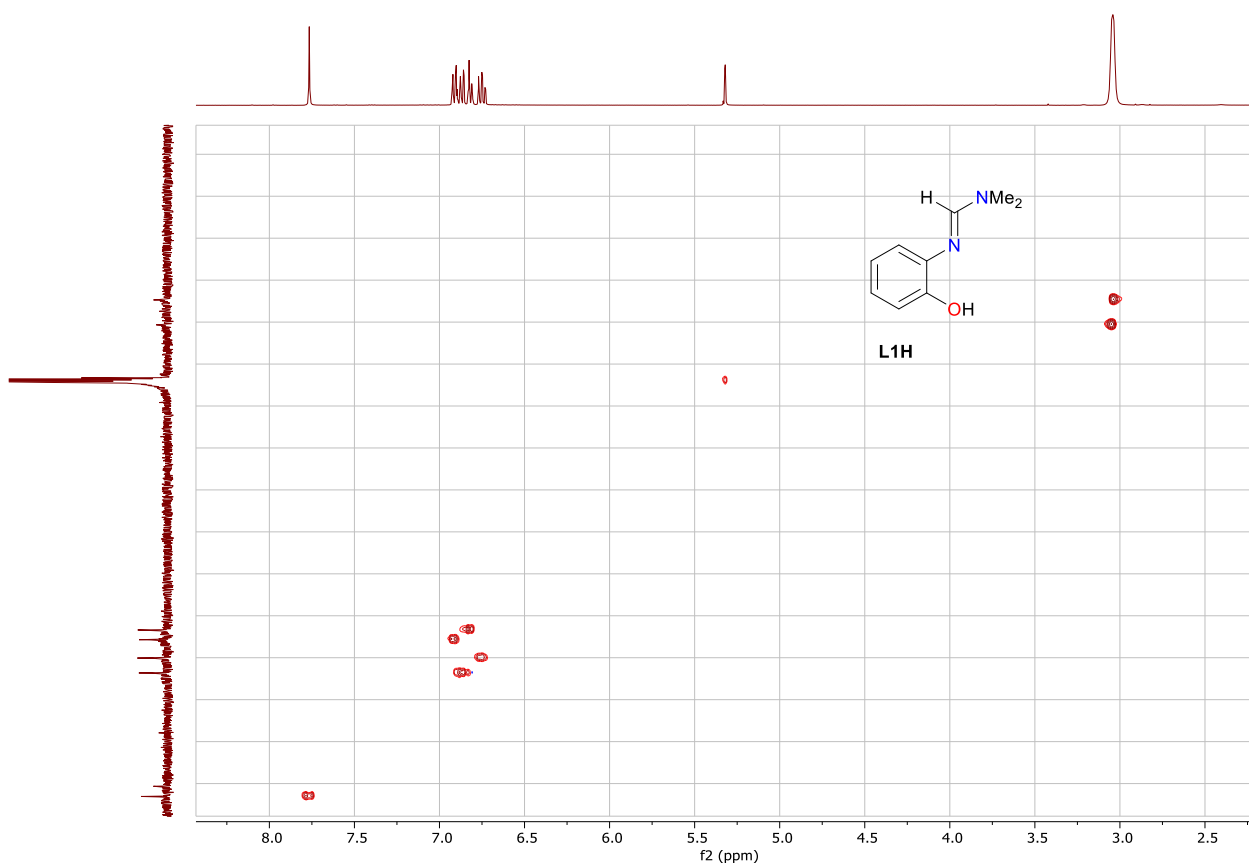

Figure S4  $^1\text{H}$   $^{13}\text{C}$  HSQC (400 MHz/101 MHz,  $\text{CD}_2\text{Cl}_2$ , 298 K) of *N'*-(2-hydroxyphenyl)-*N,N*-dimethylformamide **L1H**.

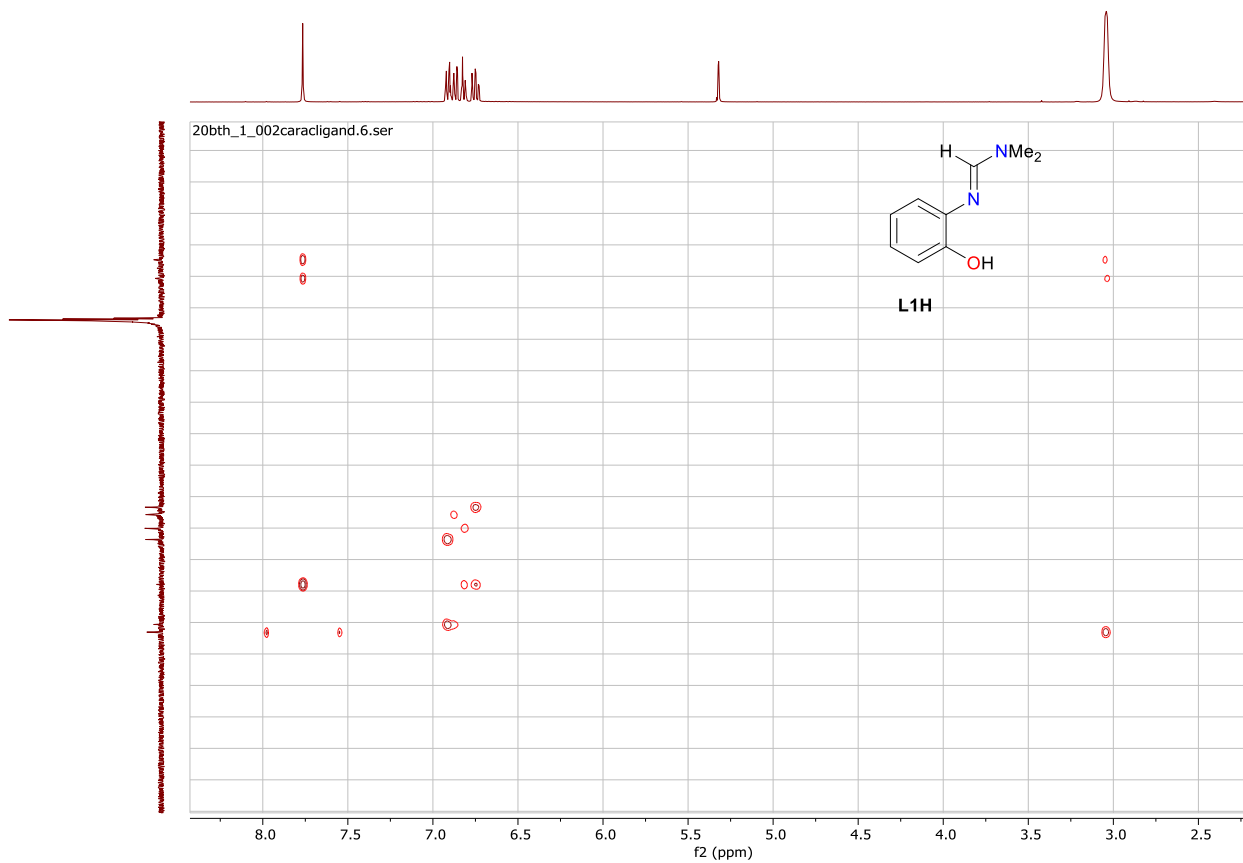

Figure S5  $^1\text{H}$   $^{13}\text{C}$  HMBC (400 MHz / 141 MHz,  $\text{CD}_2\text{Cl}_2$ , 298 K) of  $N'$ -(2-hydroxyphenyl)- $N,N$ -dimethylformamide **L1H**.

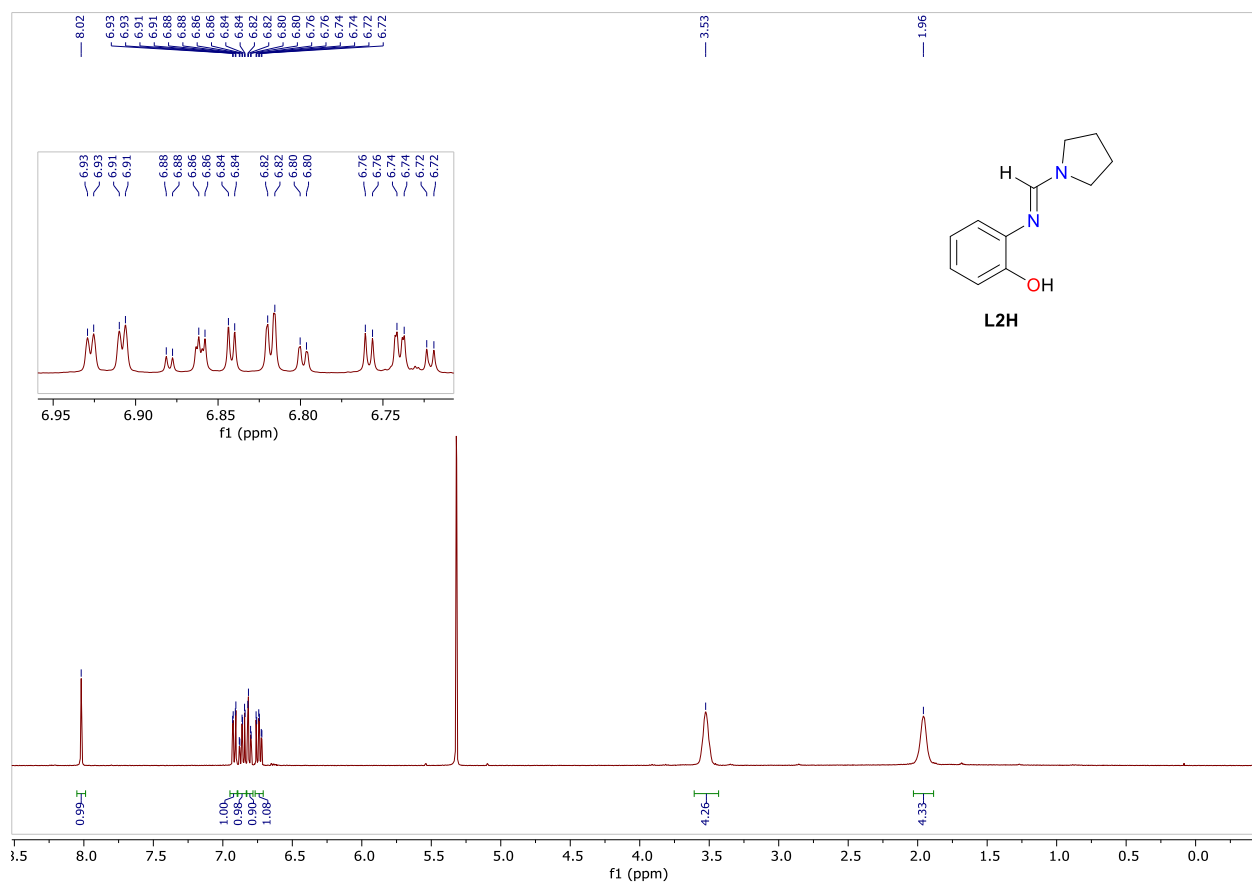

Figure S6  $^1\text{H}$  NMR (400 MHz,  $\text{CD}_2\text{Cl}_2$ , 298 K) of  $N'$ -(2-hydroxyphenyl)- $N,N$ -pyrrolydyl-formamide **L2H**.

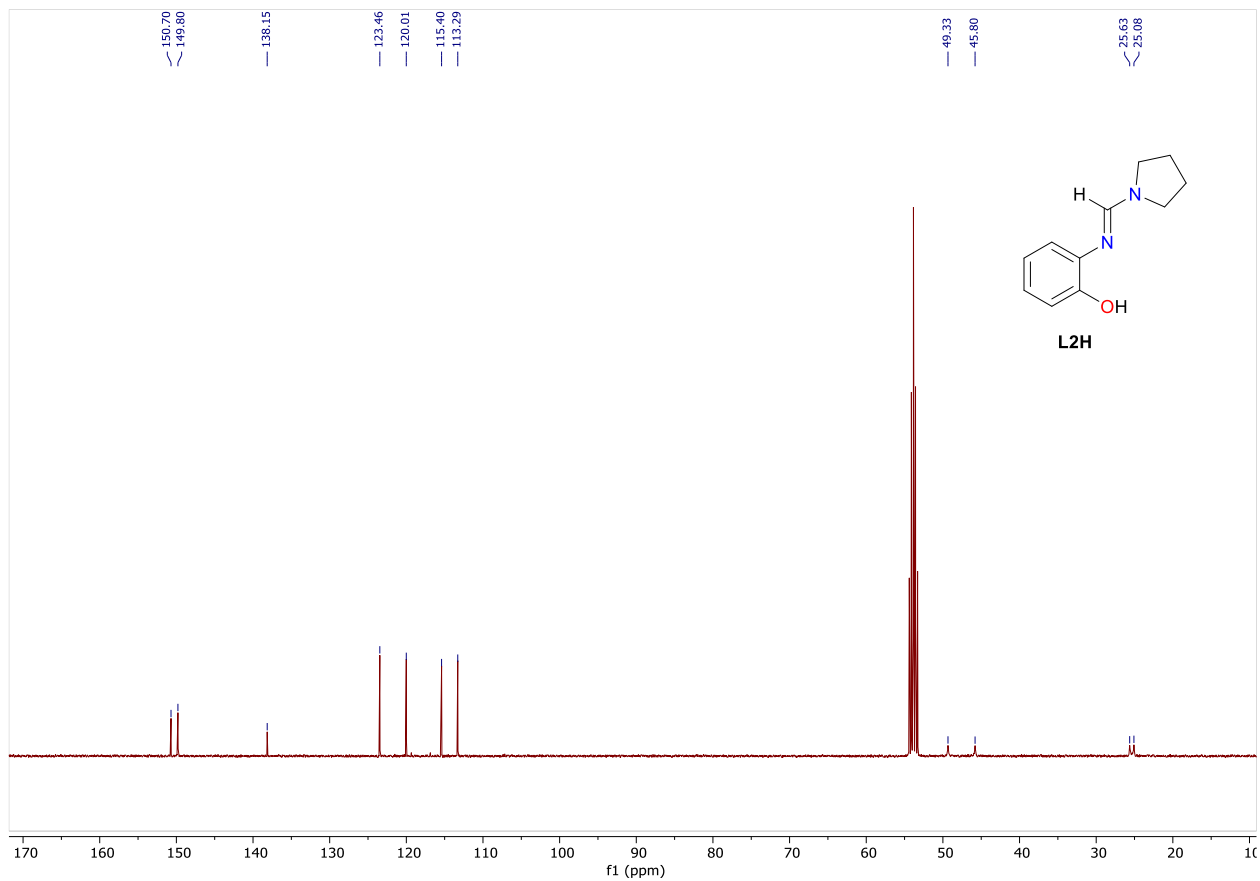

Figure S7  $\{^1\text{H}\}^{13}\text{C}$  NMR (101 MHz,  $\text{CD}_2\text{Cl}_2$ , 298 K) of *N'*(2-hydroxyphenyl)-*N,N*-pyrroldinyl-formamidine **L2H**.

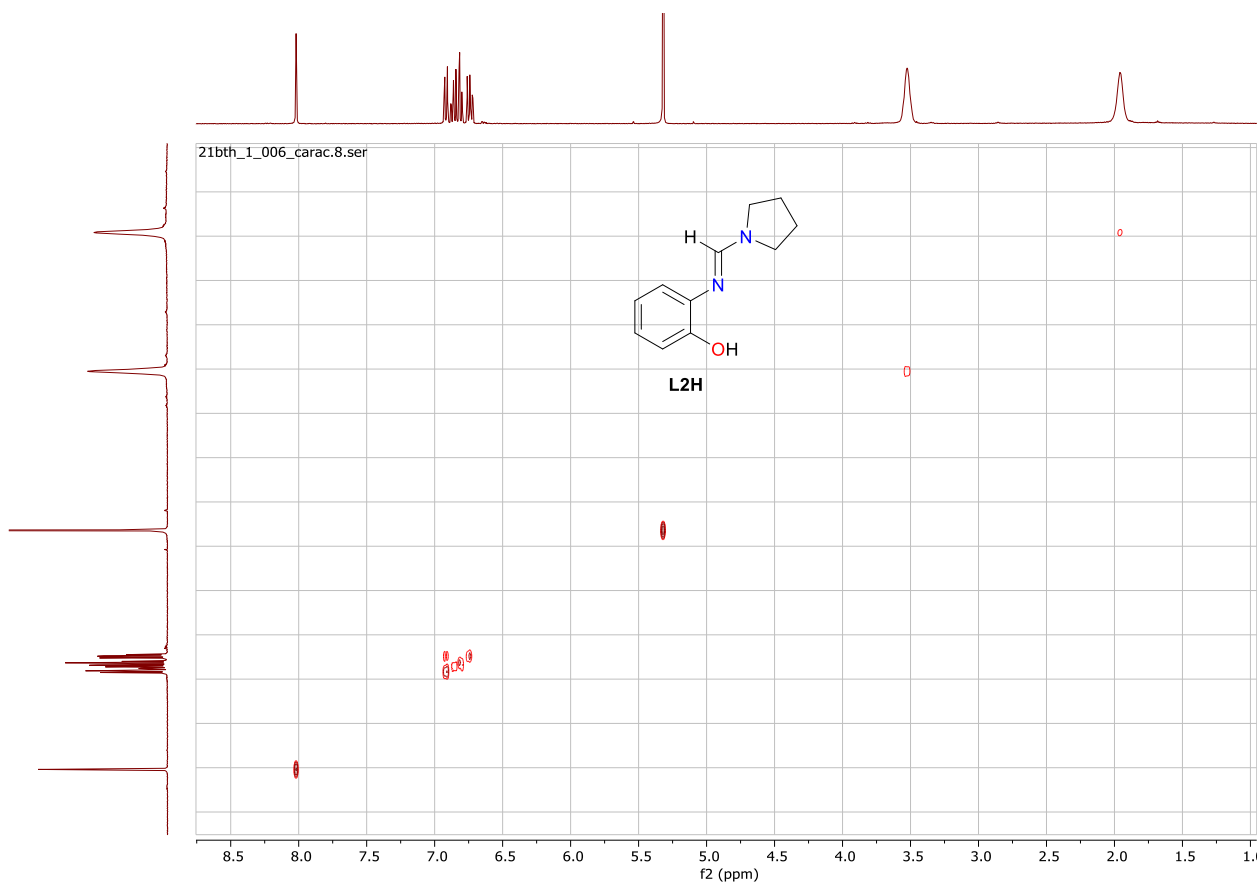

Figure S8  $^1\text{H}$   $^1\text{H}$  COSY (400 MHz,  $\text{CD}_2\text{Cl}_2$ , 298 K) of *N'*(2-hydroxyphenyl)-*N,N*-pyrroldinyl-formamidine **L2H**.

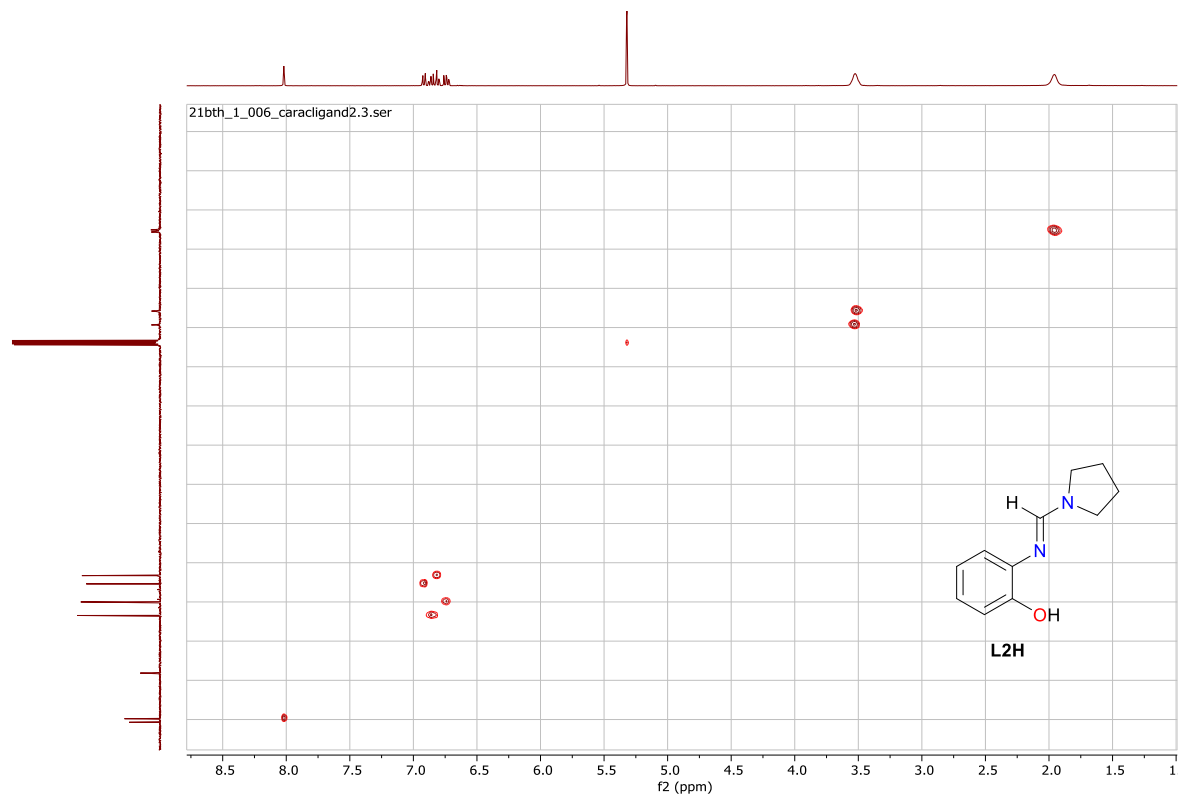

Figure S9  $^1\text{H}$   $^{13}\text{C}$  HSQC (400 MHz / 101 MHz,  $\text{CD}_2\text{Cl}_2$ , 298 K) of *N'*(2-hydroxyphenyl)-*N,N*-pyrrolydiny-formamide **L2H**.

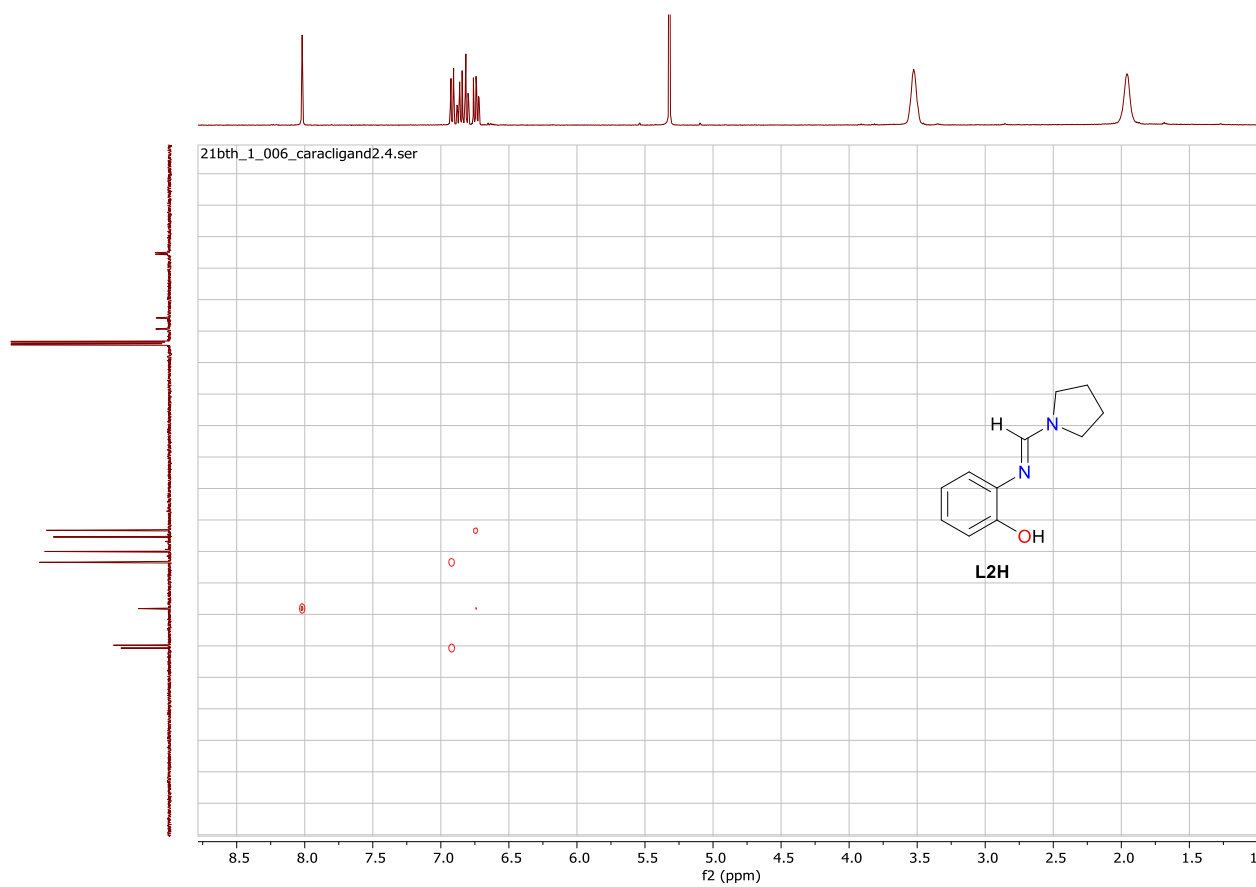

Figure S10  $^1\text{H}$   $^{13}\text{C}$  HMBC (400 MHz / 141 MHz,  $\text{CD}_2\text{Cl}_2$ , 298 K) of *N'*(2-hydroxyphenyl)-*N,N*-pyrrolydiny-formamide **L2H**.

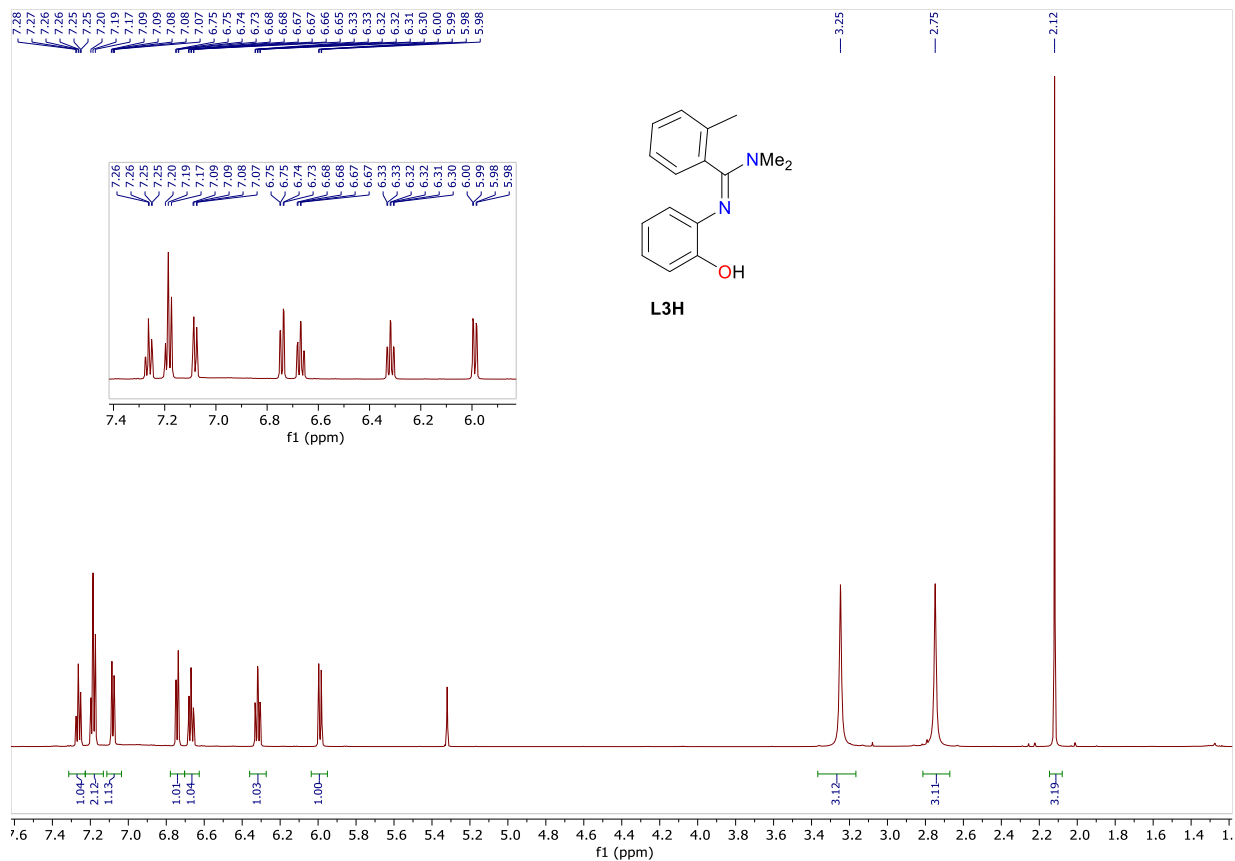

Figure S11  $^1\text{H}$  NMR (600 MHz,  $\text{CD}_2\text{Cl}_2$ , 298 K) of *N'*-(2-hydroxyphenyl)-*N,N*-dimethyl-2-methylbenzamide **L3H**.

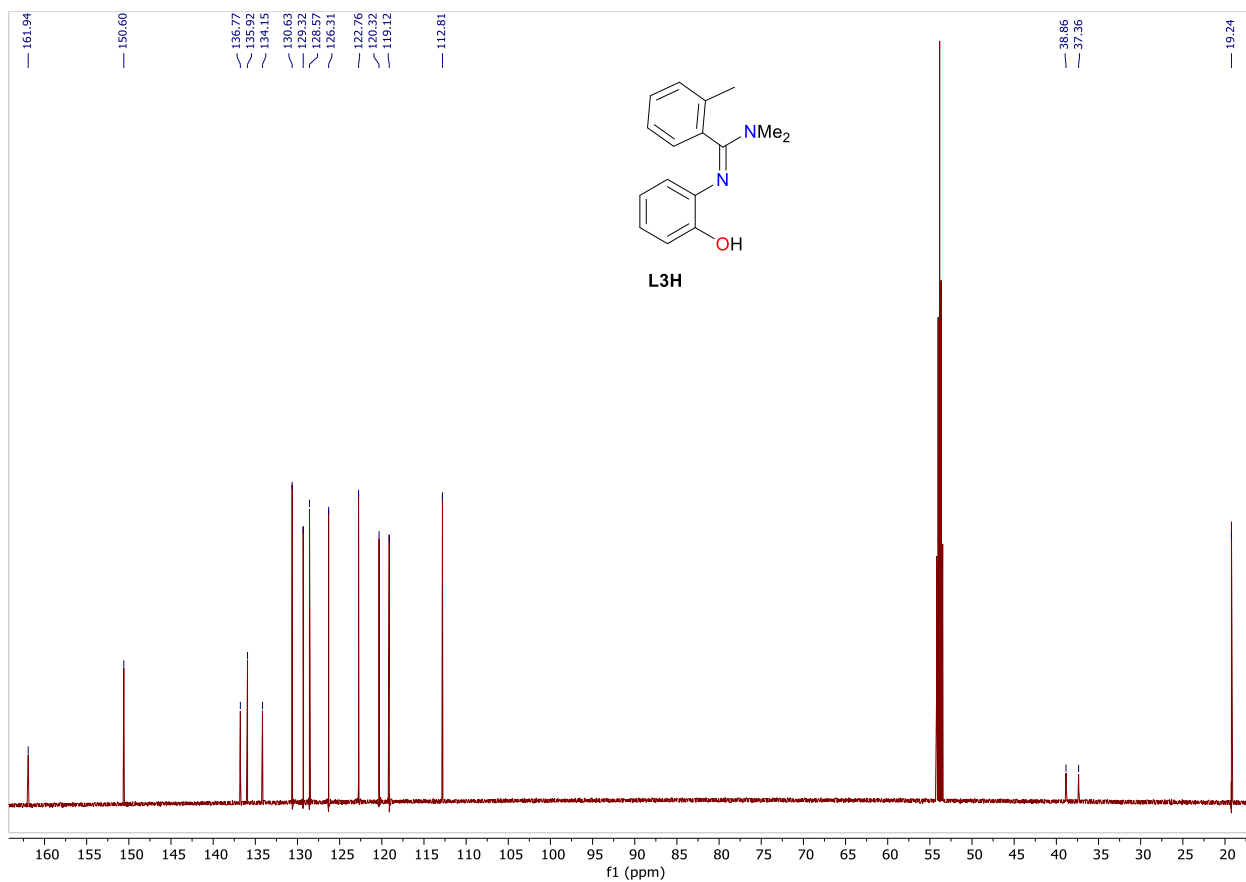

Figure S12  $\{^1\text{H}\}^{13}\text{C}$  NMR (151 MHz,  $\text{CD}_2\text{Cl}_2$ , 298 K) of *N'*-(2-hydroxyphenyl)-*N,N*-dimethyl-2-methylbenzamide **L3H**.

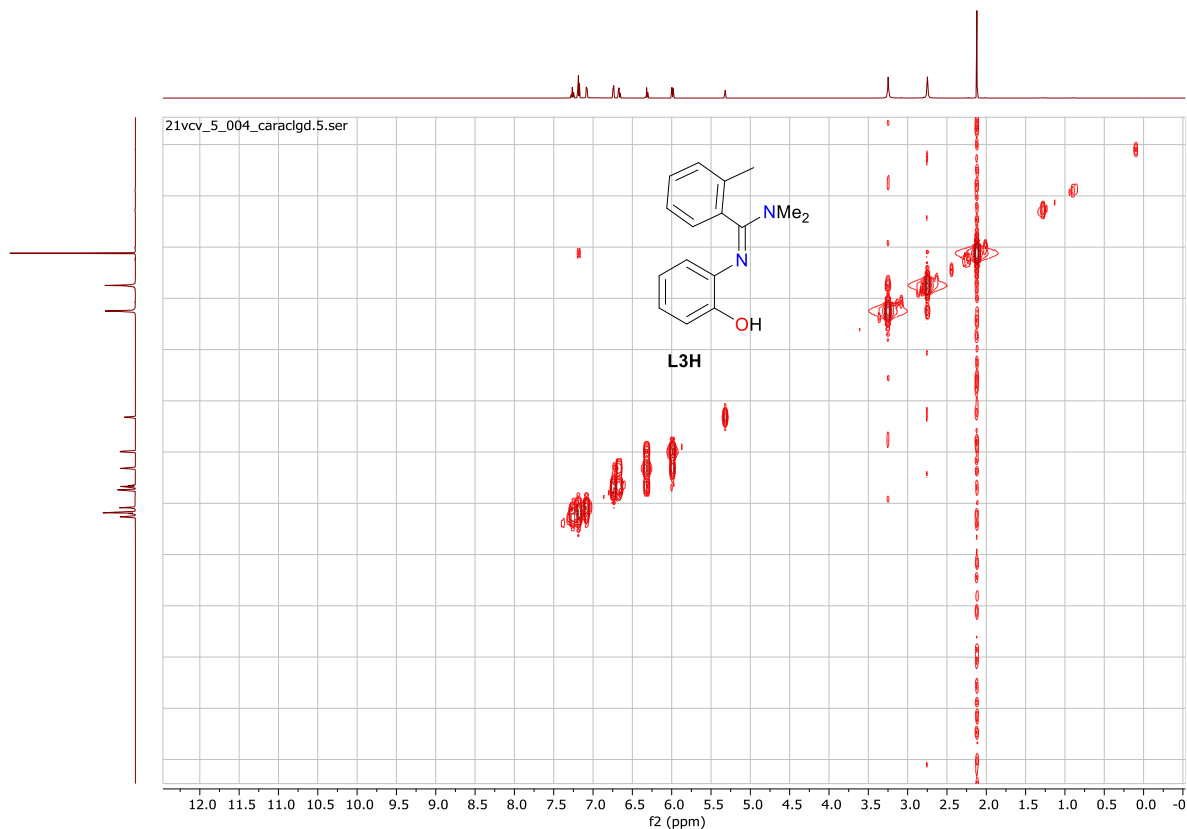

Figure S13  $^1\text{H}$   $^1\text{H}$  COSY (600 MHz,  $\text{CD}_2\text{Cl}_2$ , 298 K) of *N'*-(2-hydroxyphenyl)-*N,N*-dimethyl-2-methylbenzamide **L3H**.

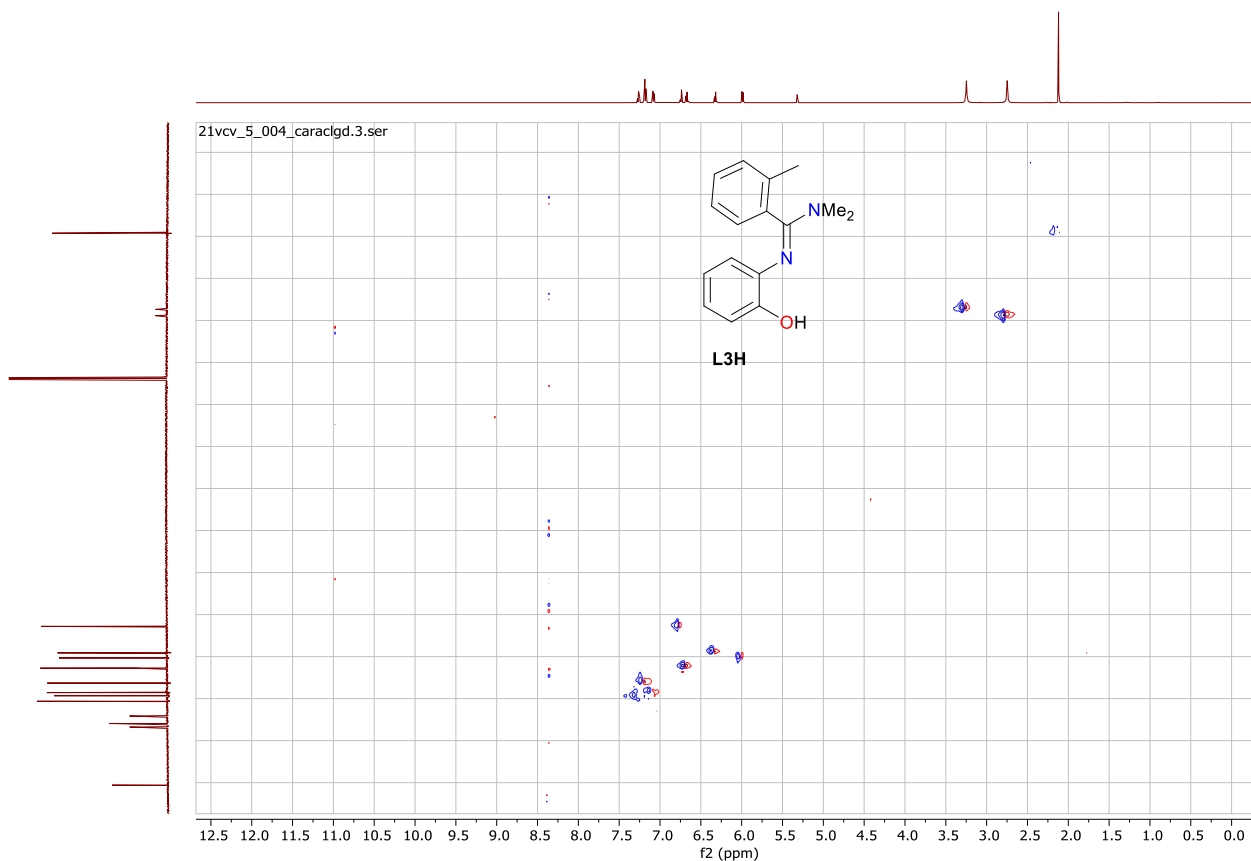

Figure S14  $^1\text{H}$   $^{13}\text{C}$  HSQC (600 MHz / 151 MHz,  $\text{CD}_2\text{Cl}_2$ , 298 K) of *N'*-(2-hydroxyphenyl)-*N,N*-dimethyl-2-methylbenzamide **L3H**.



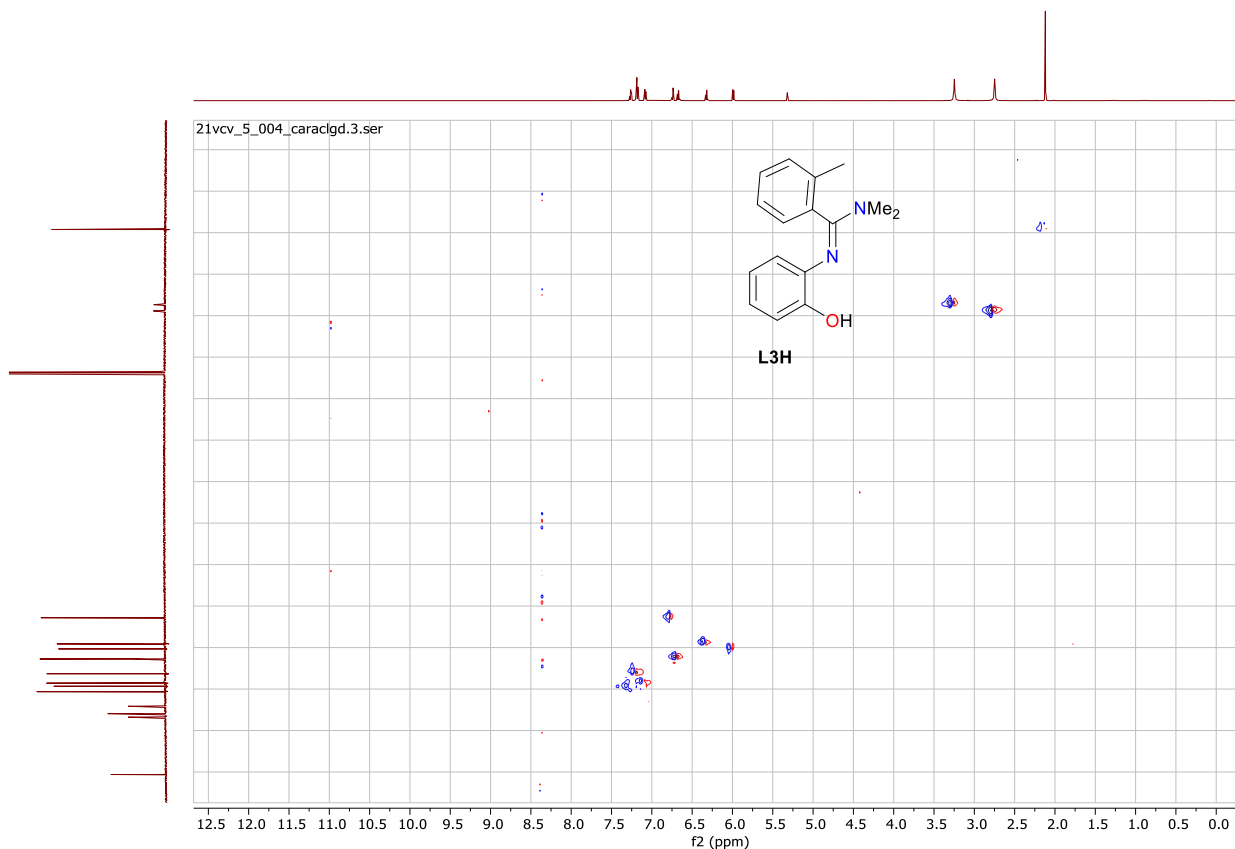

Figure S15  $^1\text{H}$   $^{13}\text{C}$  HMBC (600 MHz / 151 MHz,  $\text{CD}_2\text{Cl}_2$ , 298 K) of *N'*-(2-hydroxyphenyl)-*N,N*-dimethyl-2-methylbenzamidine **L3H**.

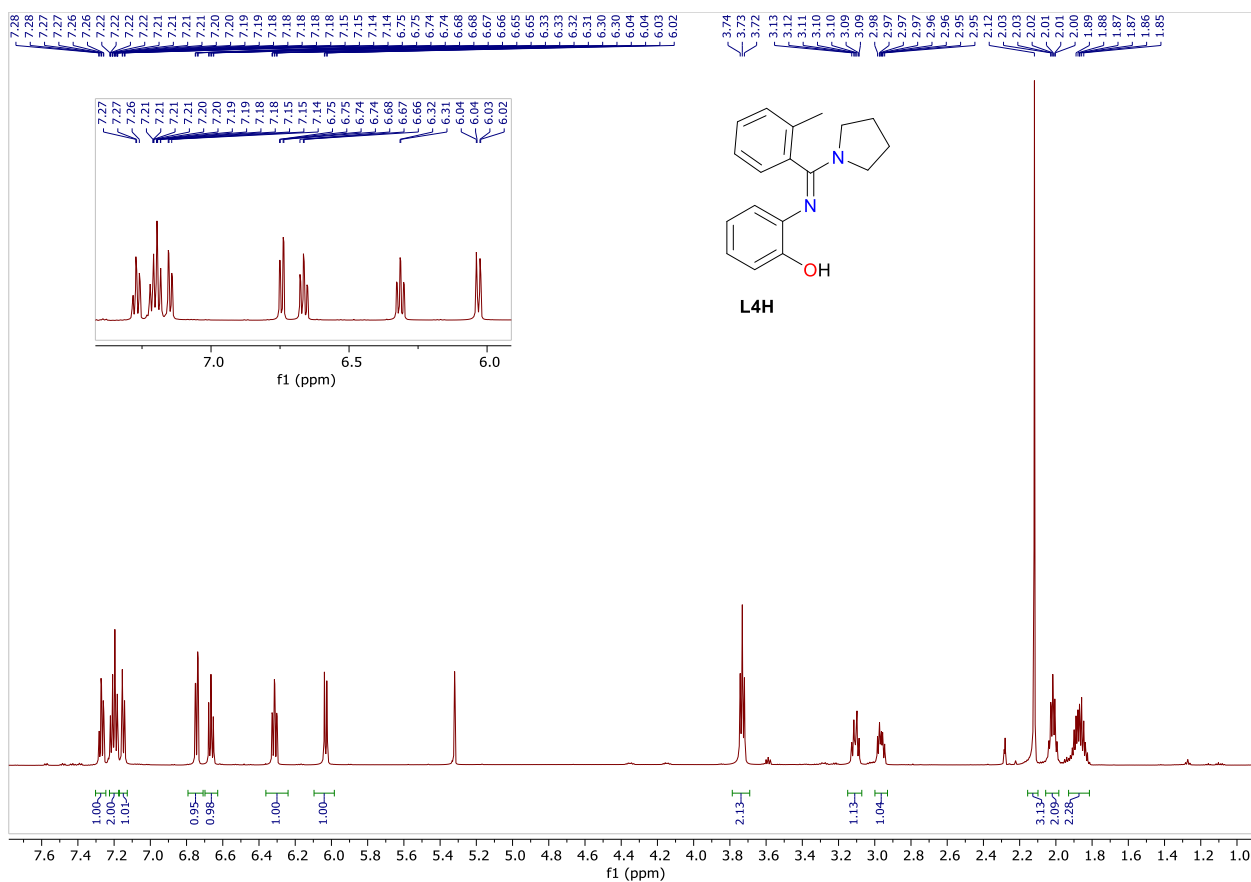

Figure S16  $^1\text{H}$  NMR (600 MHz,  $\text{CD}_2\text{Cl}_2$ , 298 K) of *N'*-(2-hydroxyphenyl)-*N,N*-pyrrolidinyl-2-methylbenzamidine **L4H**.

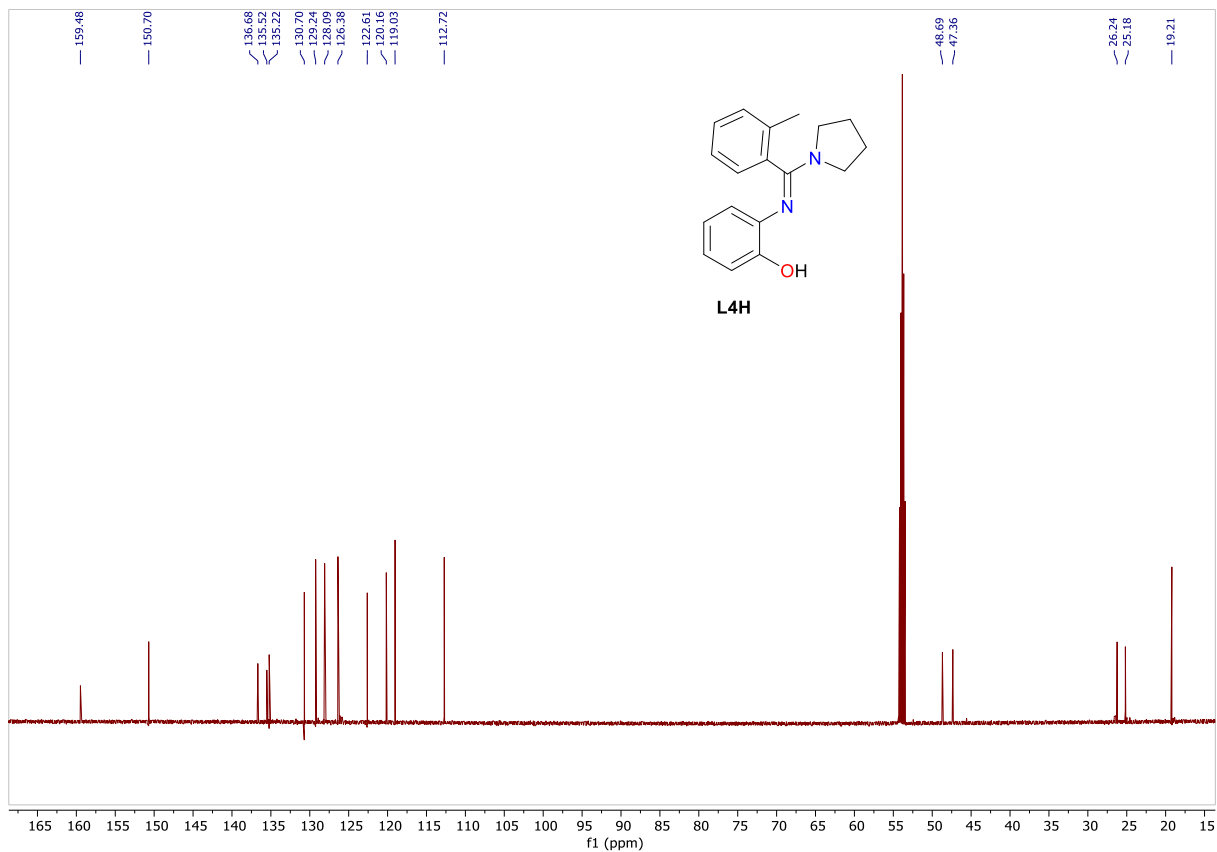

Figure S17  $\{^1\text{H}\}^{13}\text{C}$  NMR (151 MHz,  $\text{CD}_2\text{Cl}_2$ , 298 K) of *N'*-(2-hydroxyphenyl)-*N,N*-pyrrolidinyl-2-methylbenzamide **L4H**.

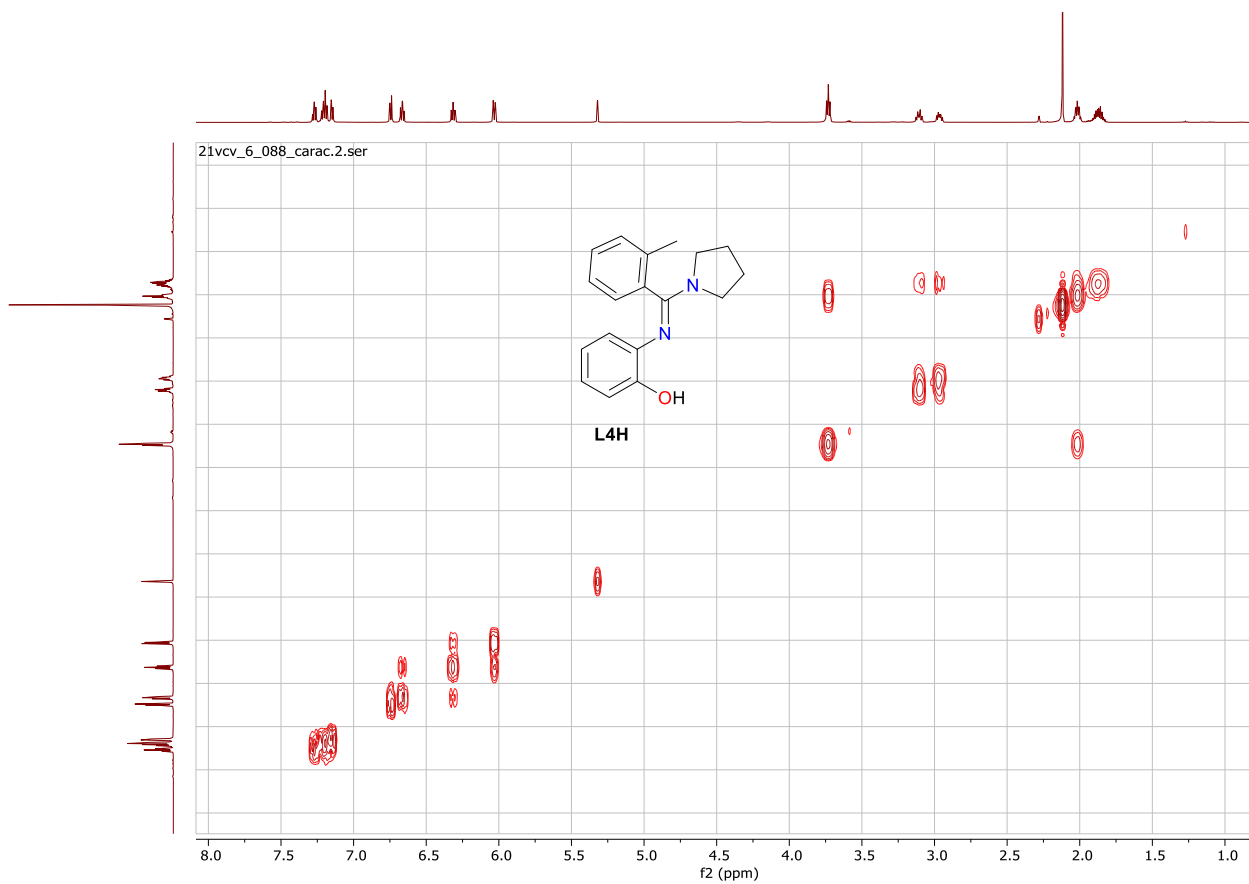

Figure S18  $^1\text{H}$   $^1\text{H}$  COSY (600 MHz,  $\text{CD}_2\text{Cl}_2$ , 298 K) of *N'*-(2-hydroxyphenyl)-*N,N*-pyrrolidinyl-2-methylbenzamide **L4H**.

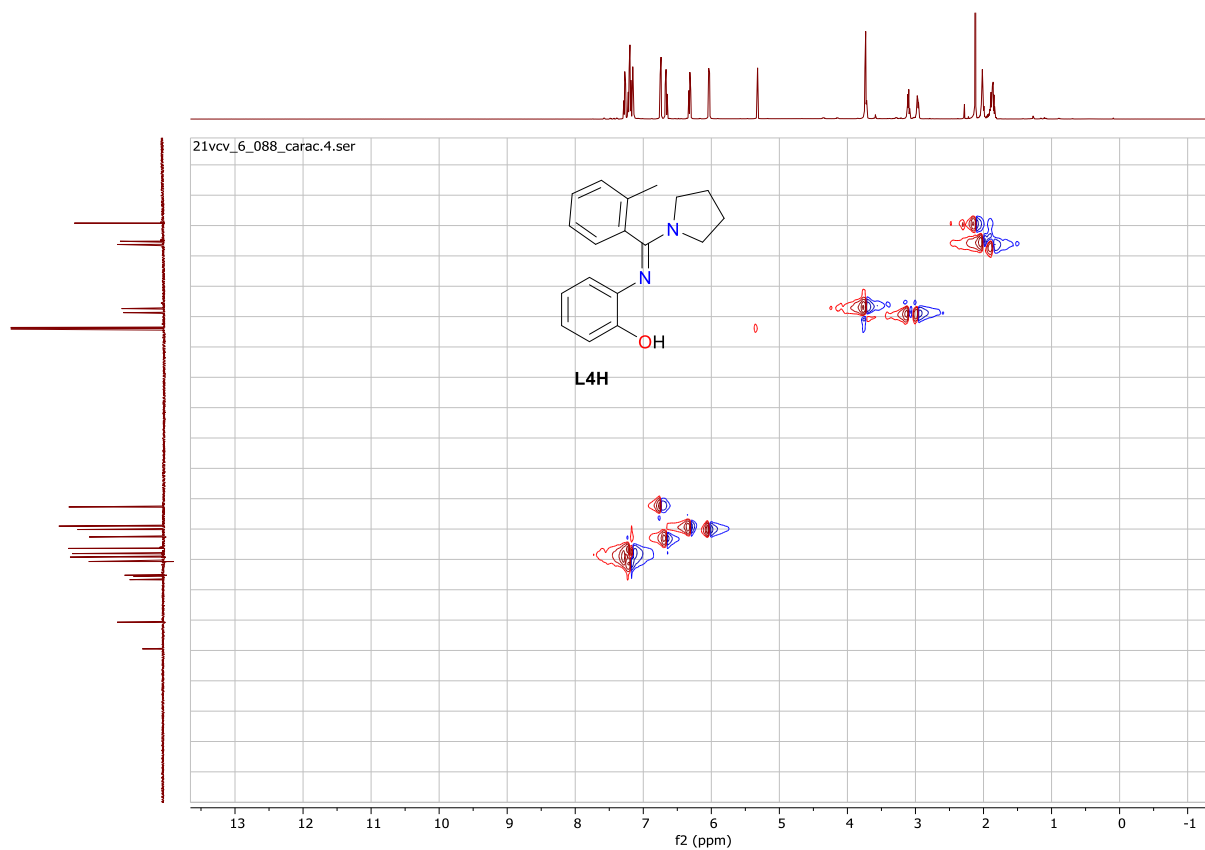

Figure S19  $^1\text{H}$   $^{13}\text{C}$  HSQC (600 MHz / 151 MHz,  $\text{CD}_2\text{Cl}_2$ , 298 K) of *N'*-(2-hydroxyphenyl)-*N,N*-pyrrolidinyl-2-methylbenzamide **L4H**.

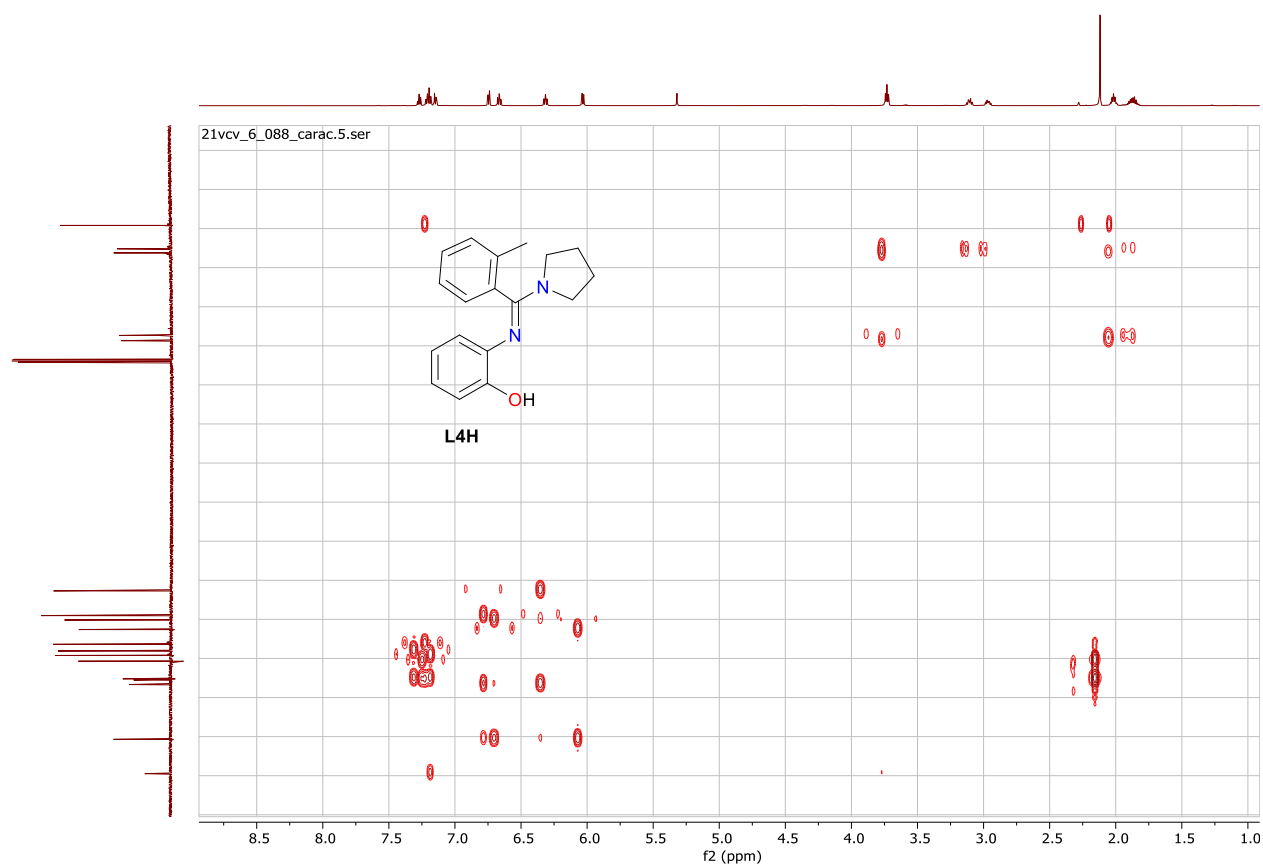

Figure S20  $^1\text{H}$   $^{13}\text{C}$  HMBC (600 MHz / 151 MHz,  $\text{CD}_2\text{Cl}_2$ , 298 K) of *N'*-(2-hydroxyphenyl)-*N,N*-pyrrolidinyl-2-methylbenzamide **L4H**.

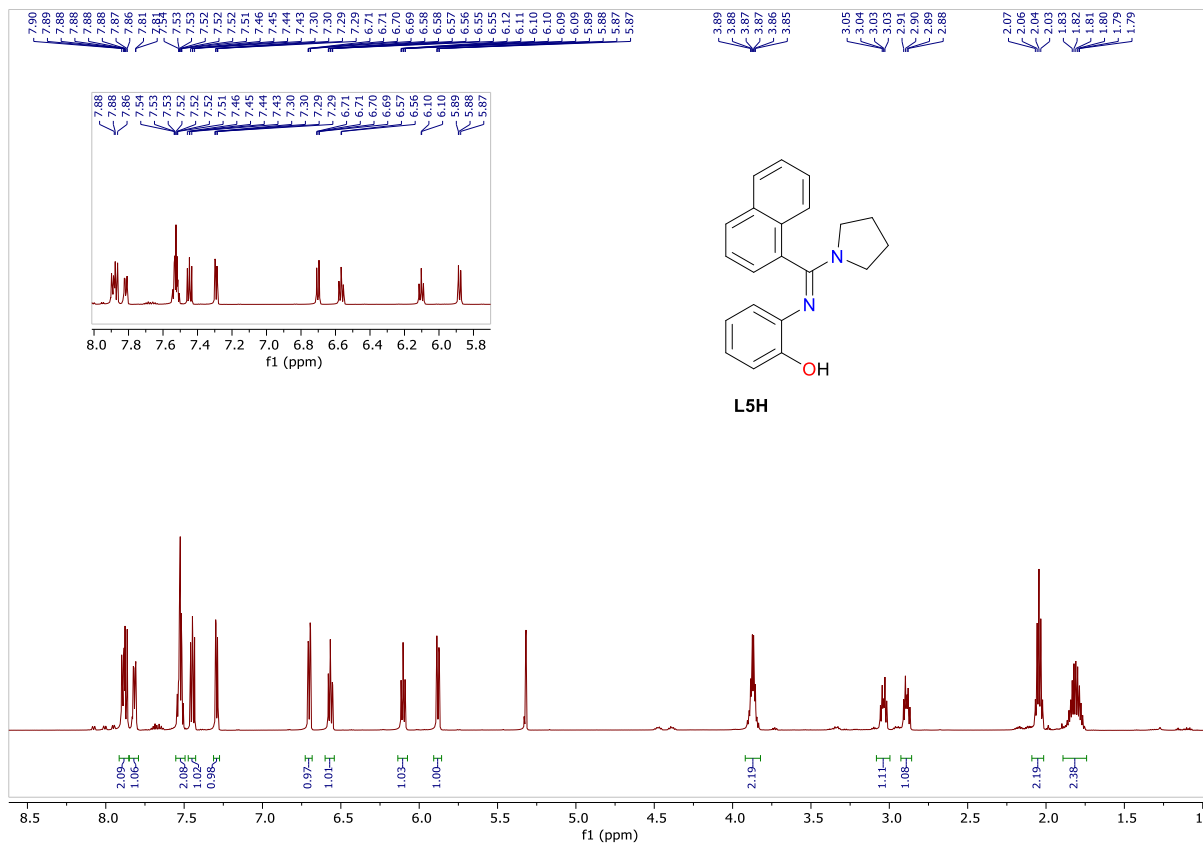

Figure S21 <sup>1</sup>H NMR (600 MHz, CD<sub>2</sub>Cl<sub>2</sub>, 298 K) of *N'*-(2-hydroxyphenyl)-*N,N*-pyrrolidinyl-1-naphthylamide **L5H**.

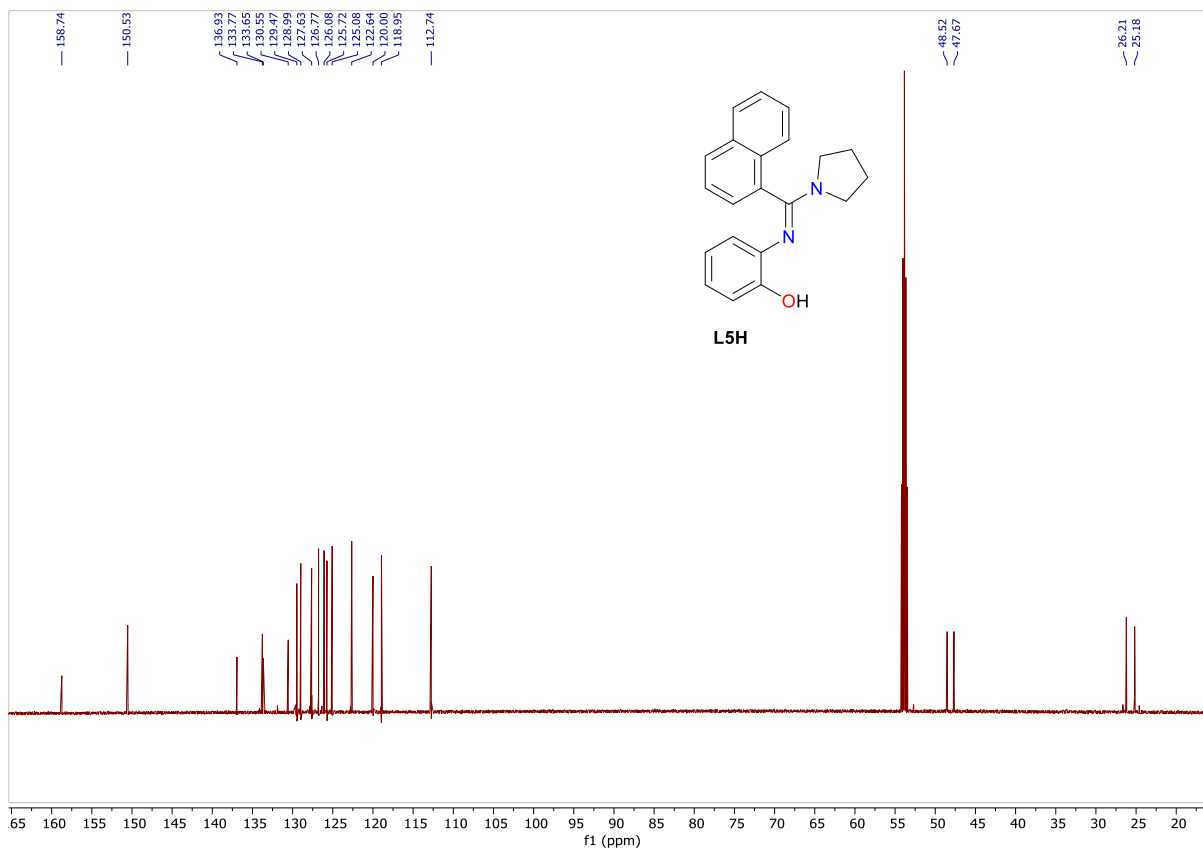

Figure S22 <sup>1</sup>H<sup>13</sup>C NMR (151 MHz, CD<sub>2</sub>Cl<sub>2</sub>, 298 K) of *N'*-(2-hydroxyphenyl)-*N,N*-pyrrolidinyl-1-naphthylamide **L5H**.

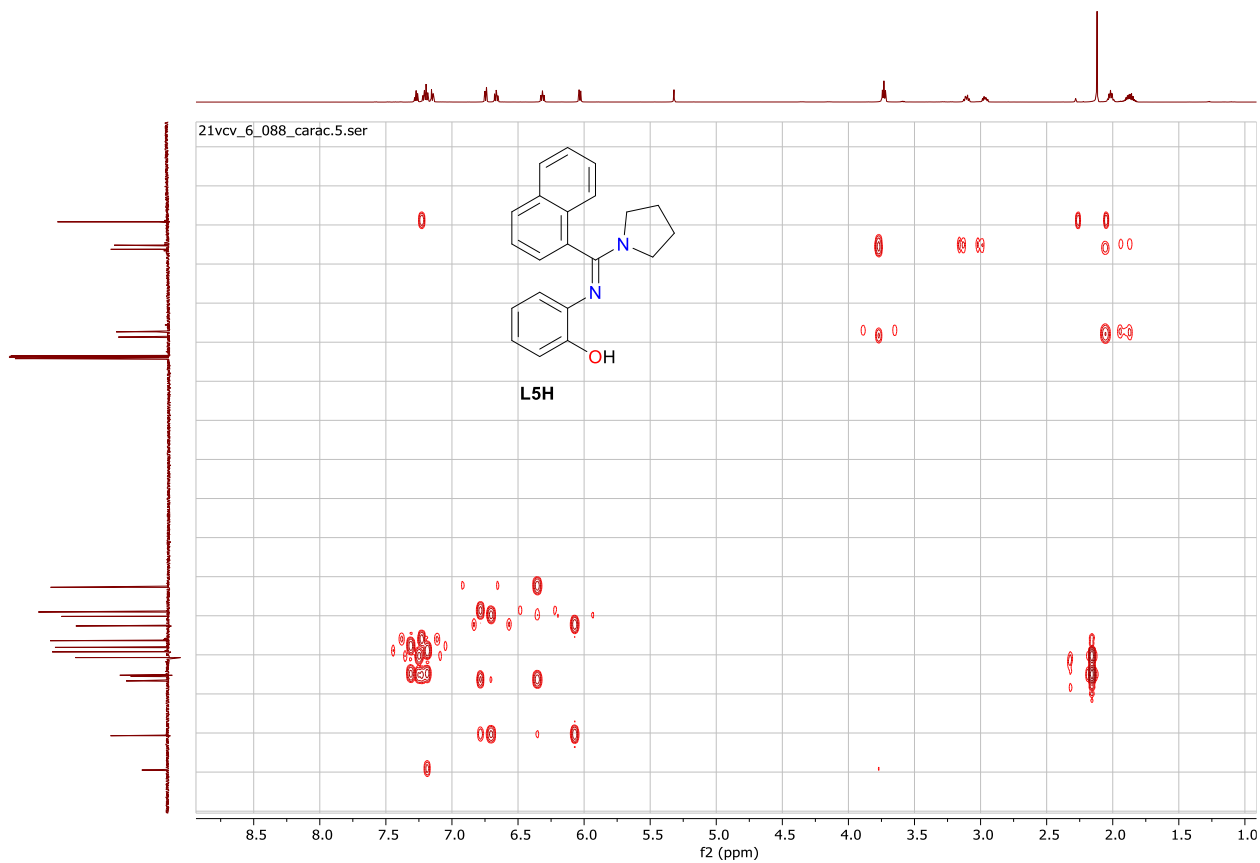

Figure S23  $^1\text{H}$   $^1\text{H}$  COSY (600 MHz,  $\text{CD}_2\text{Cl}_2$ , 298 K) of *N'*-(2-hydroxyphenyl)-*N,N*-pyrrolidinyl-1-naphthylamide L5H.

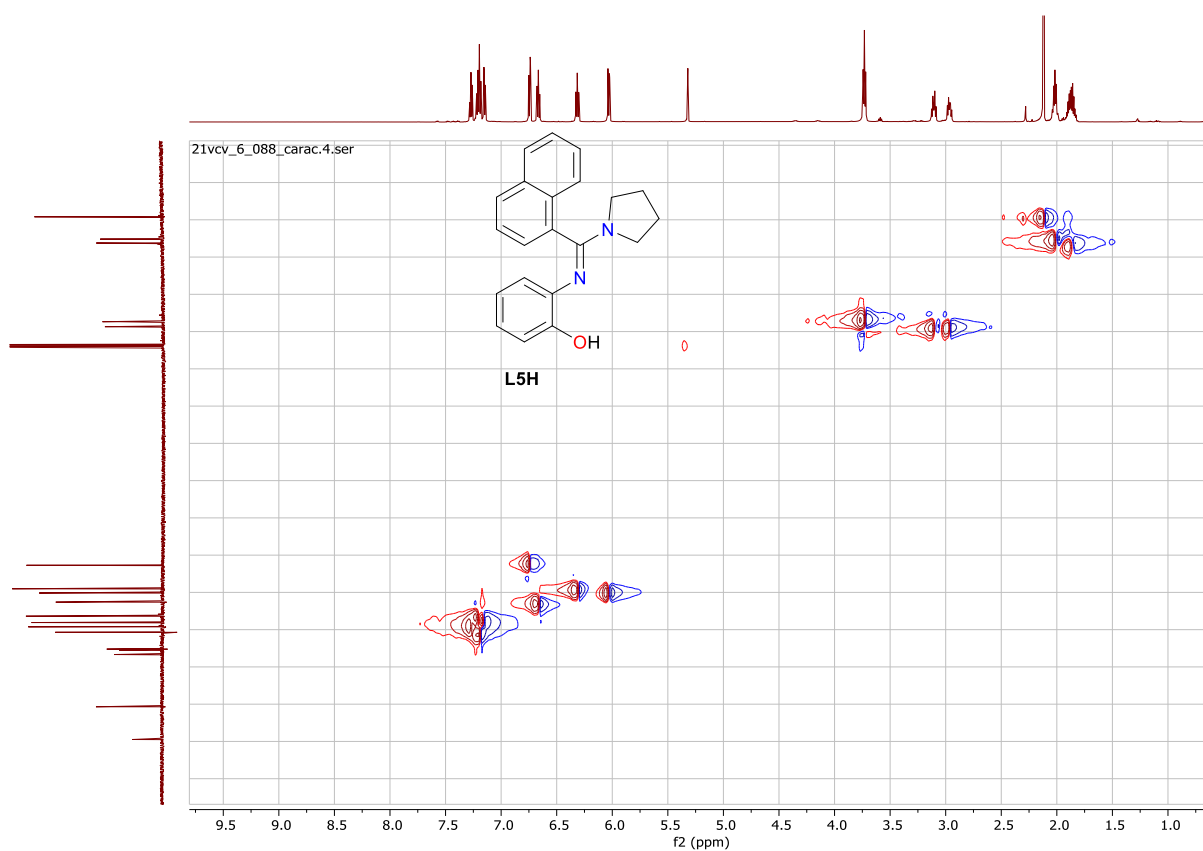

Figure S24  $^1\text{H}$   $^{13}\text{C}$  HSQC (600 MHz / 151 MHz,  $\text{CD}_2\text{Cl}_2$ , 298 K) of *N'*-(2-hydroxyphenyl)-*N,N*-pyrrolidinyl-1-naphthylamide L5H.

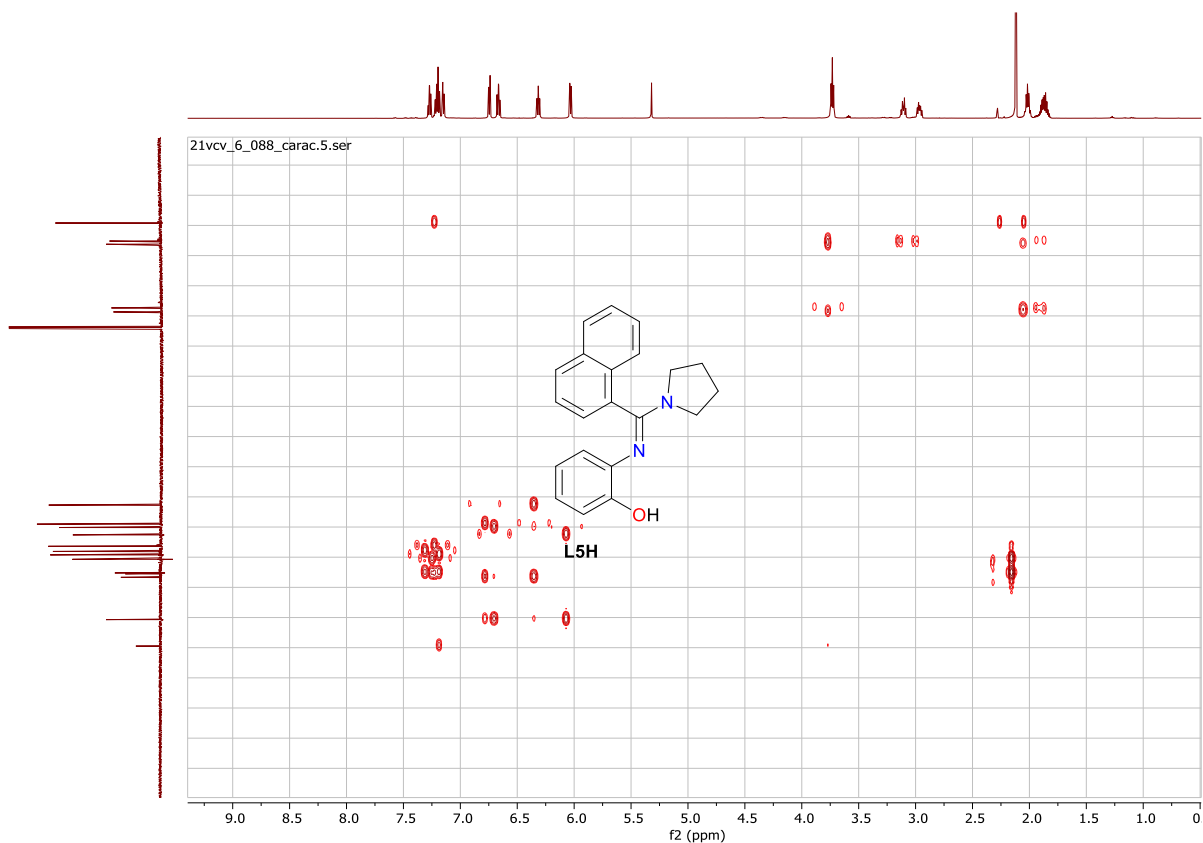

Figure S25  $^1\text{H}$   $^{13}\text{C}$  HMBC (600 MHz / 151 MHz,  $\text{CD}_2\text{Cl}_2$ , 298 K) of *N'*-(2-hydroxyphenyl)-*N,N*-pyrrolidinyl-1-naphthylamide **L5H**.

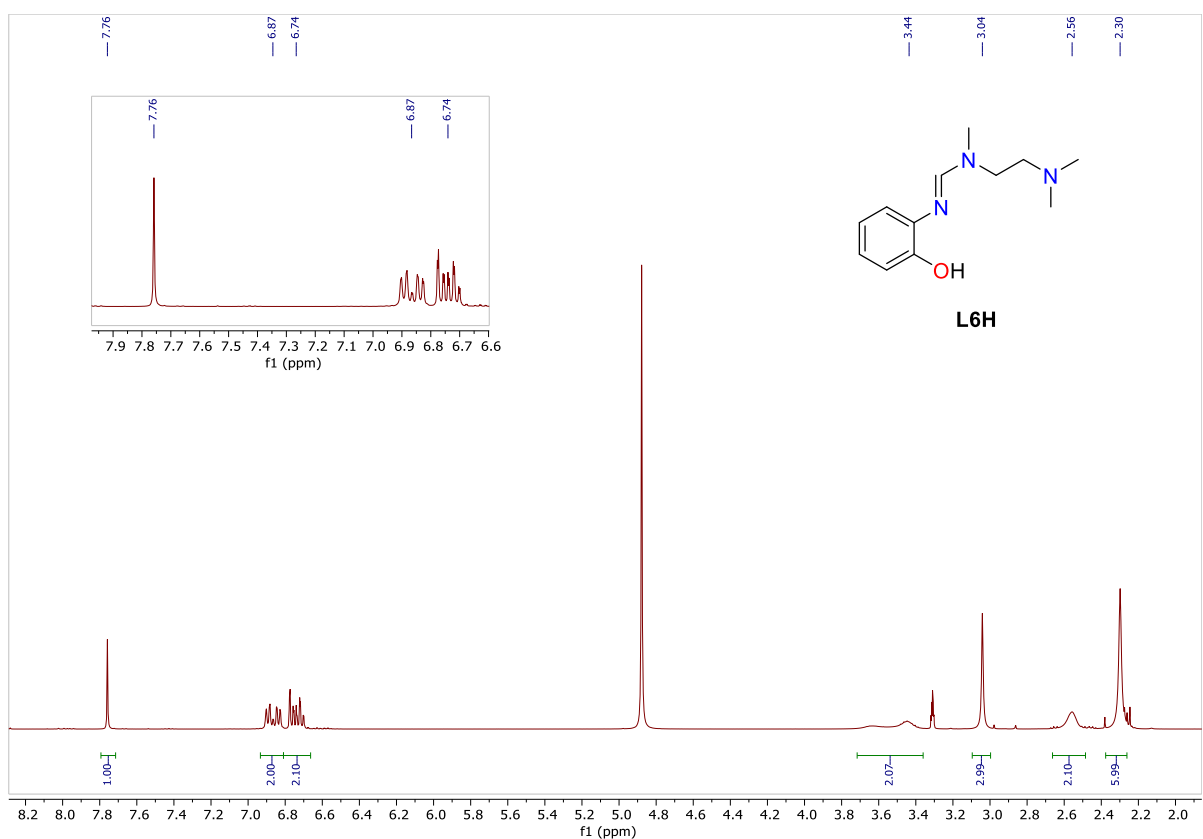

Figure S26  $^1\text{H}$  NMR (400 MHz,  $\text{MeOD}$ , 298 K) of *N'*-(2-hydroxyphenyl)-*N*-methyl-*N*-(dimethylaminoethyl)formamide **L6H**.

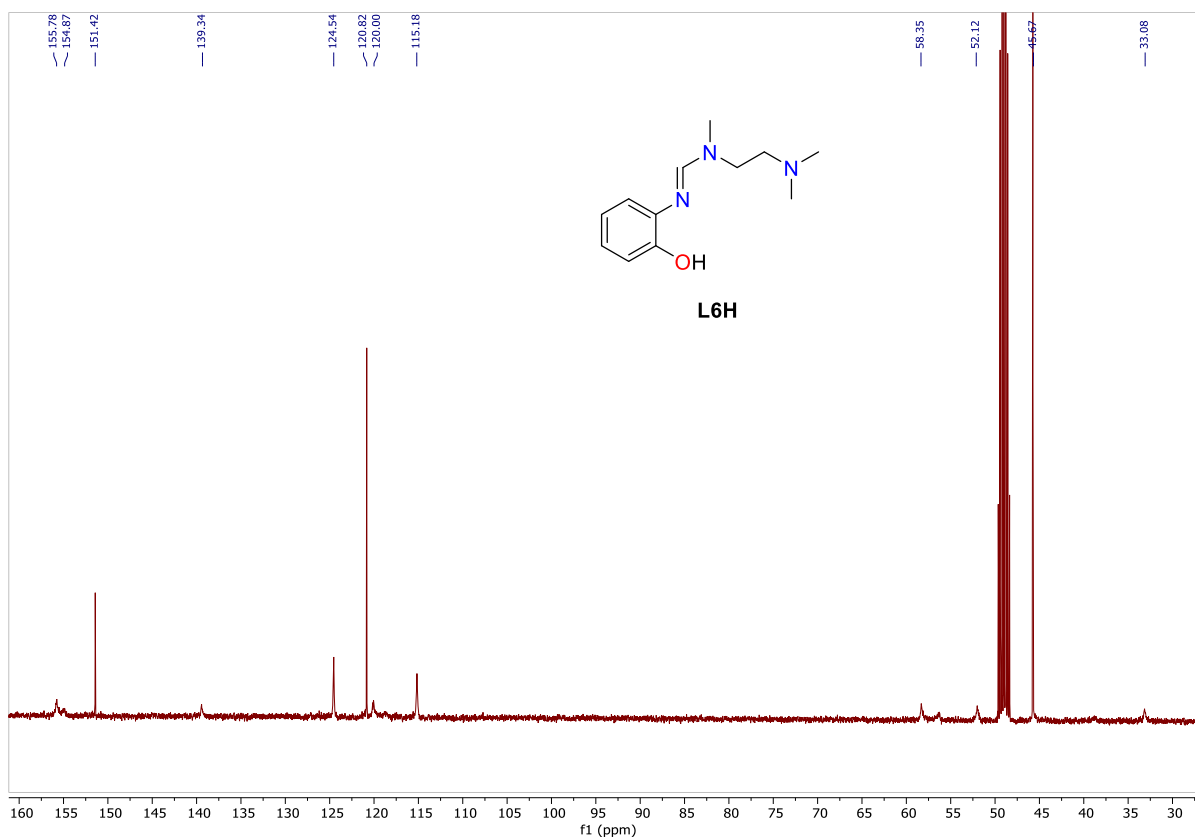

Figure S27  $\{^1\text{H}\}^{13}\text{C}$  NMR (101 MHz, MeOD, 298 K) of *N'*-(2-hydroxyphenyl)-*N*-methyl-*N*-(dimethylaminoethyl)formamide **L6H**.

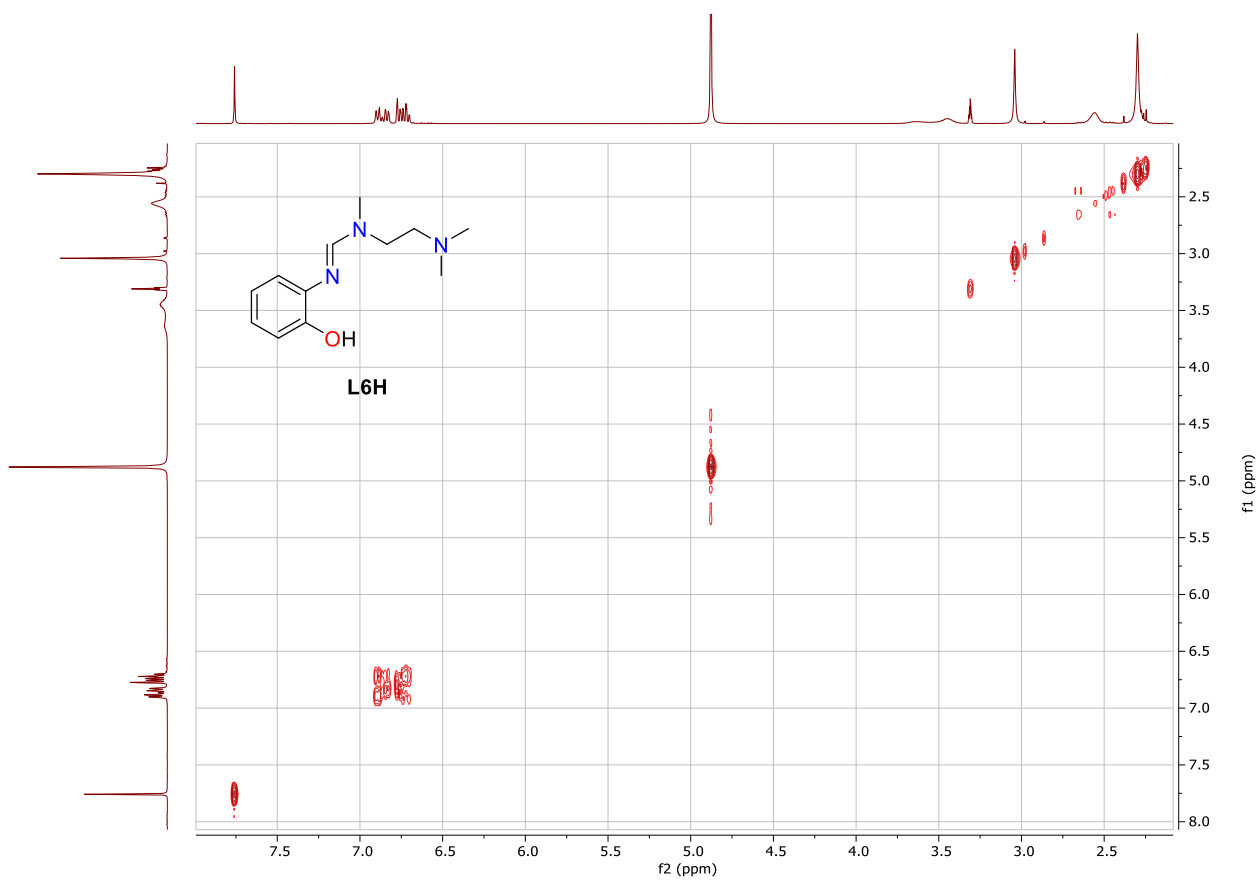

Figure S28  $^1\text{H}$   $^1\text{H}$  COSY (400 MHz / 400 MHz, MeOD, 298 K) of *N'*-(2-hydroxyphenyl)-*N*-methyl-*N*-(dimethylaminoethyl)formamide **L6H**.

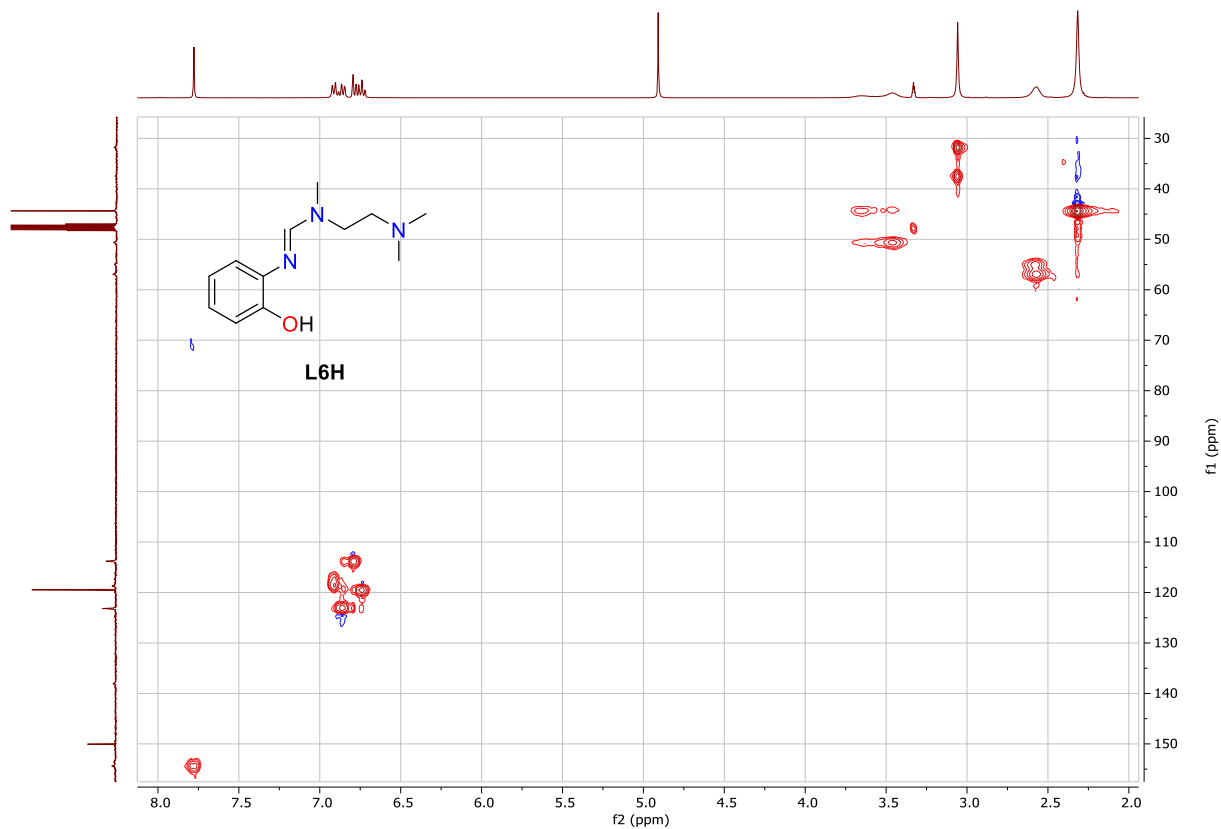

Figure S29  $^1\text{H}$   $^{13}\text{C}$  HSQC (400 MHz / 101 MHz, MeOD, 298 K) of *N'*-(2-hydroxyphenyl)-*N*-methyl-*N*-(dimethylaminoethyl)formamide **L6H**.

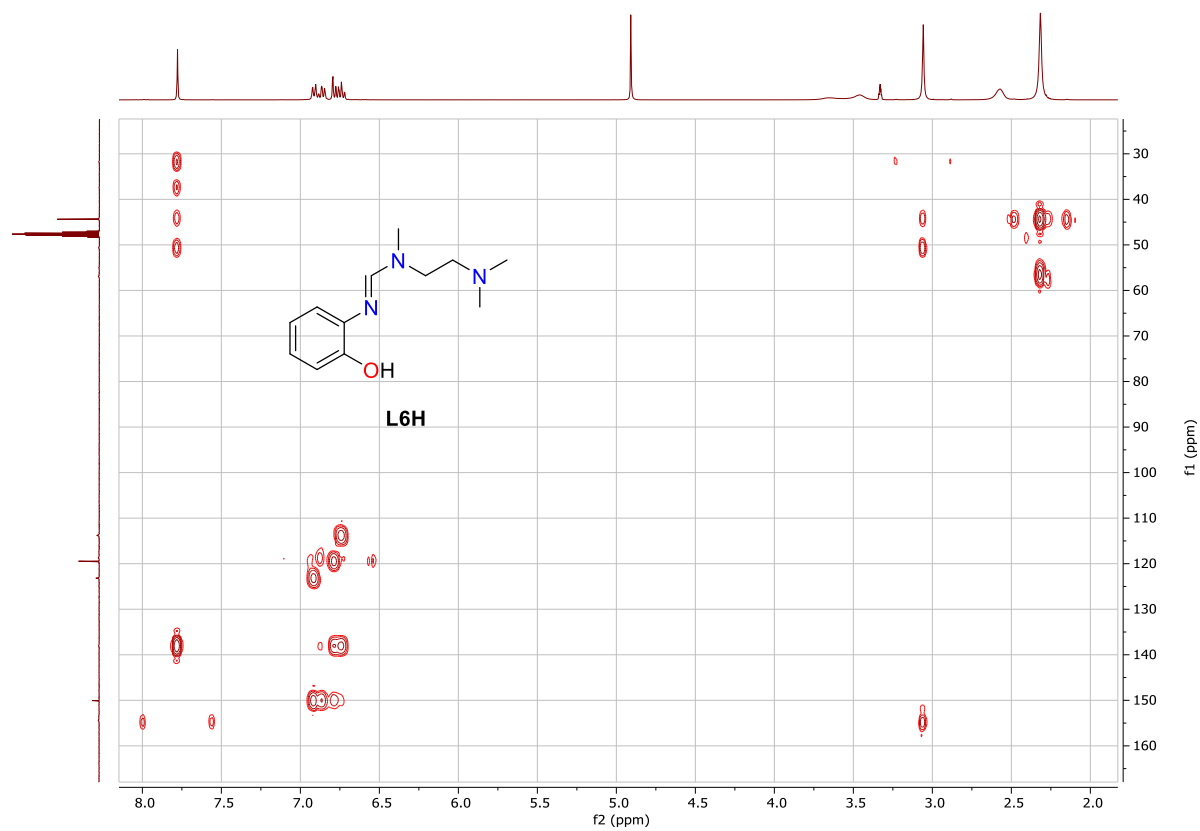

Figure S30  $^1\text{H}$   $^{13}\text{C}$  HMBC (400 MHz / 101 MHz, MeOD, 298 K) of *N'*-(2-hydroxyphenyl)-*N*-methyl-*N*-(dimethylaminoethyl)formamide **L6H**.



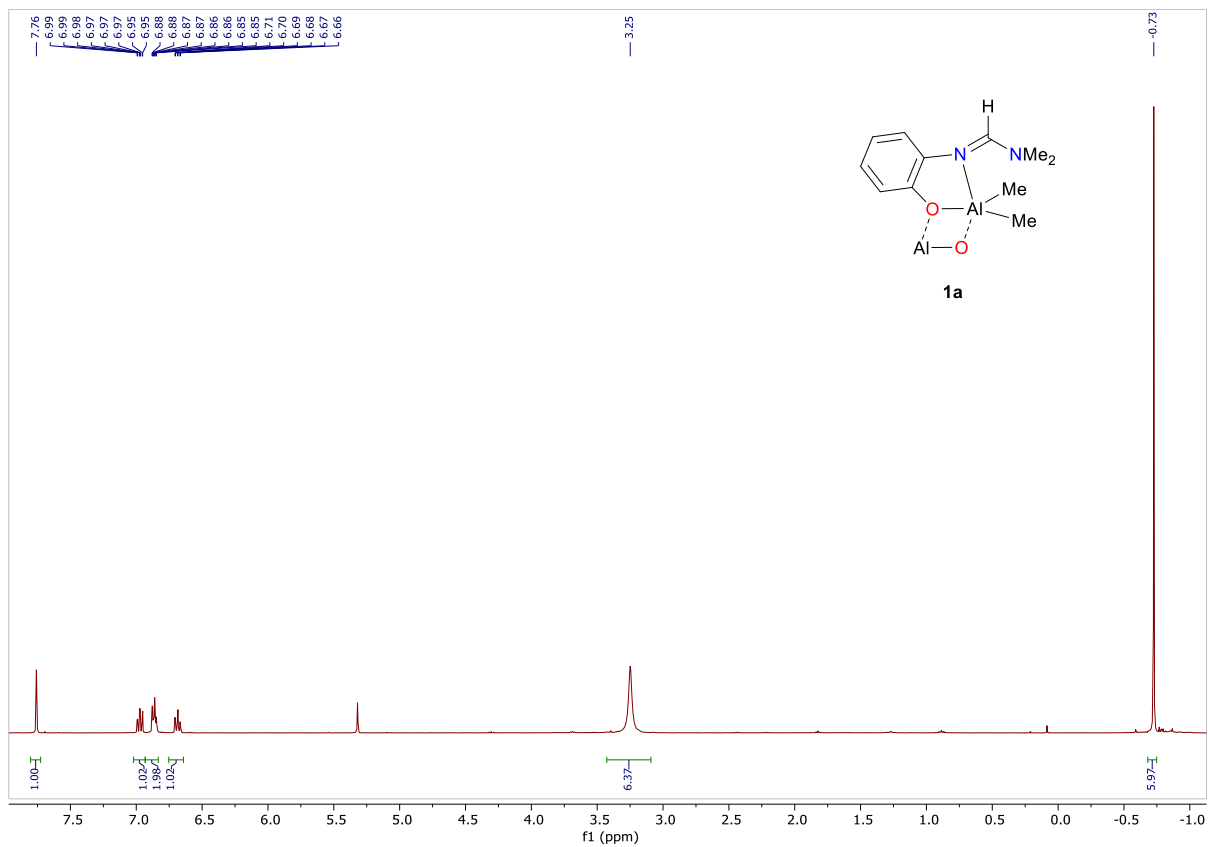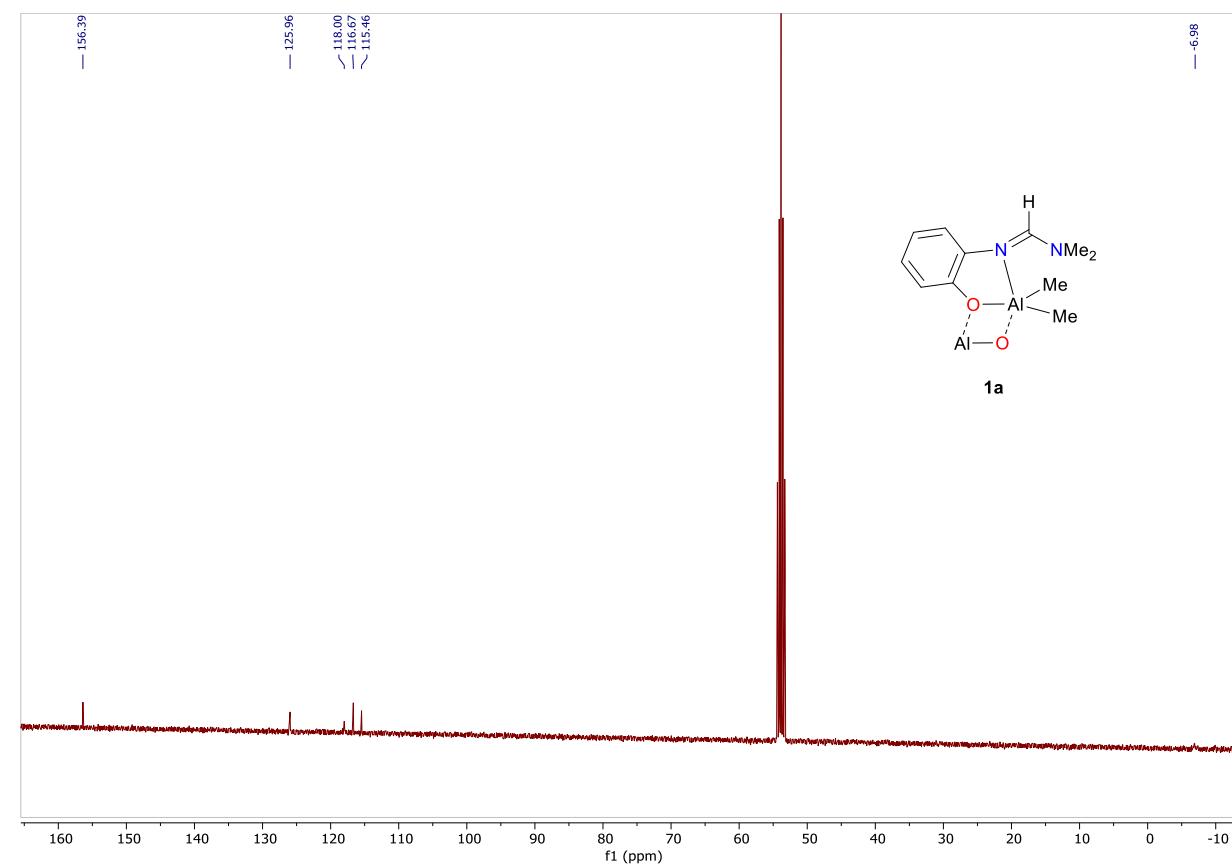

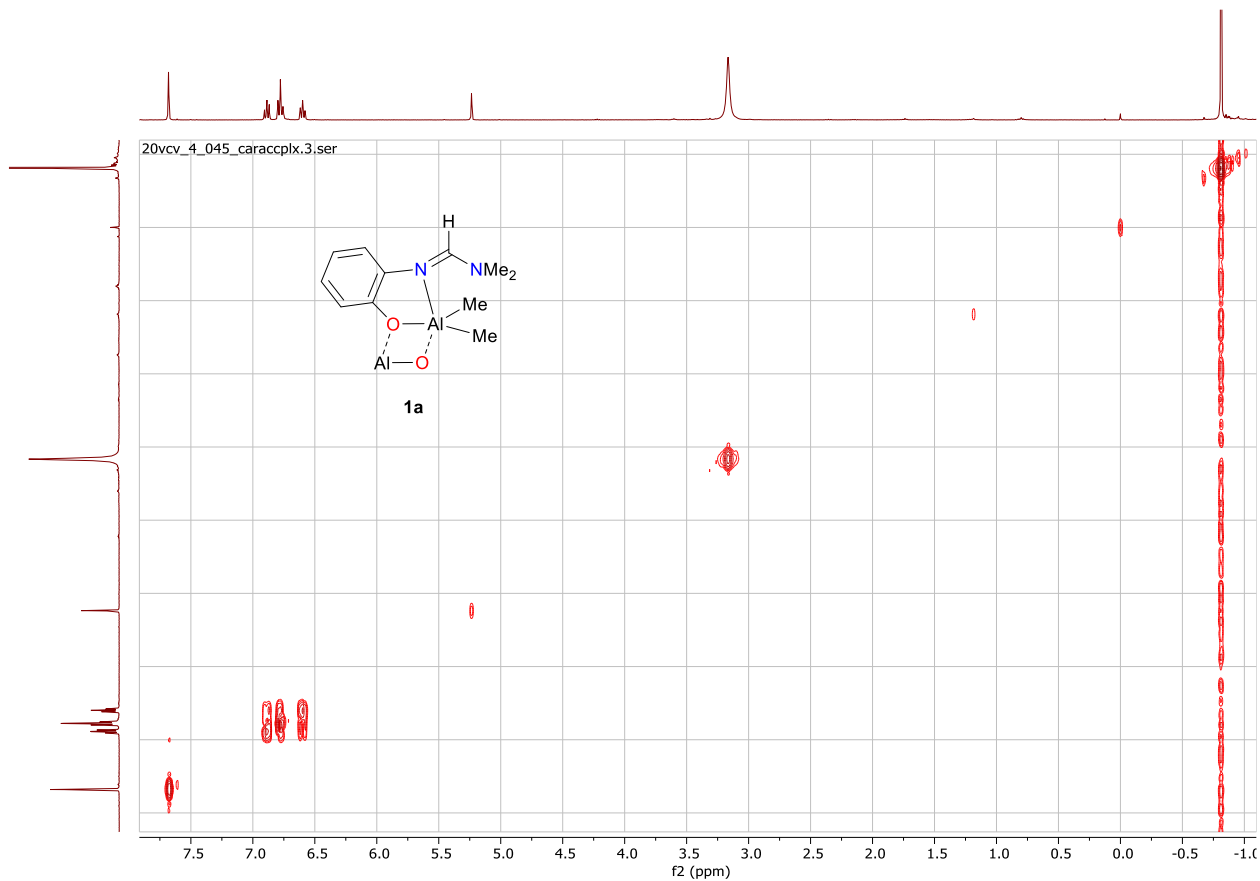

Figure S33  $^1\text{H}$   $^1\text{H}$  COSY (400 MHz,  $\text{CD}_2\text{Cl}_2$ , 298 K) of **1a**.

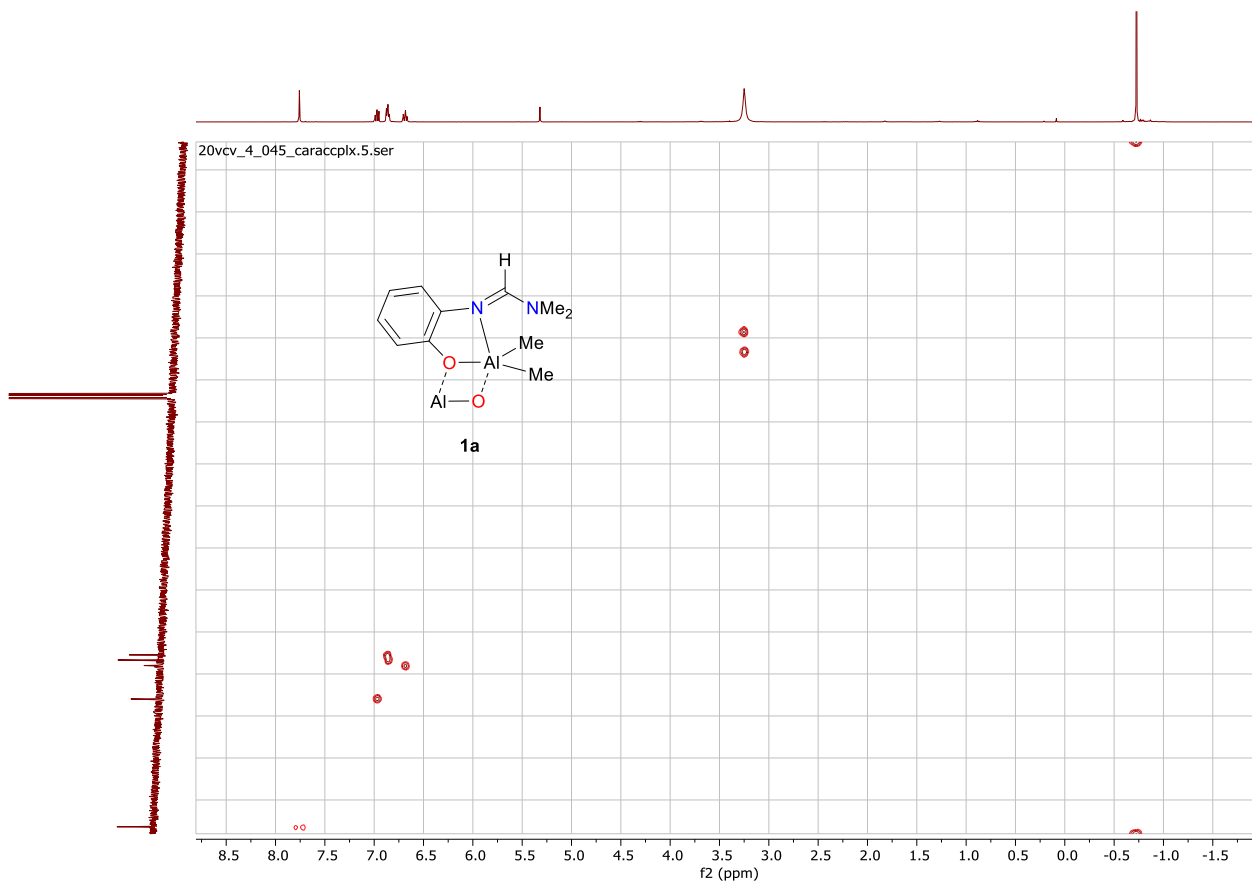

Figure S34  $^1\text{H}$   $^{13}\text{C}$  HSQC (400 MHz / 101 MHz,  $\text{CD}_2\text{Cl}_2$ , 298 K) of **1a**.

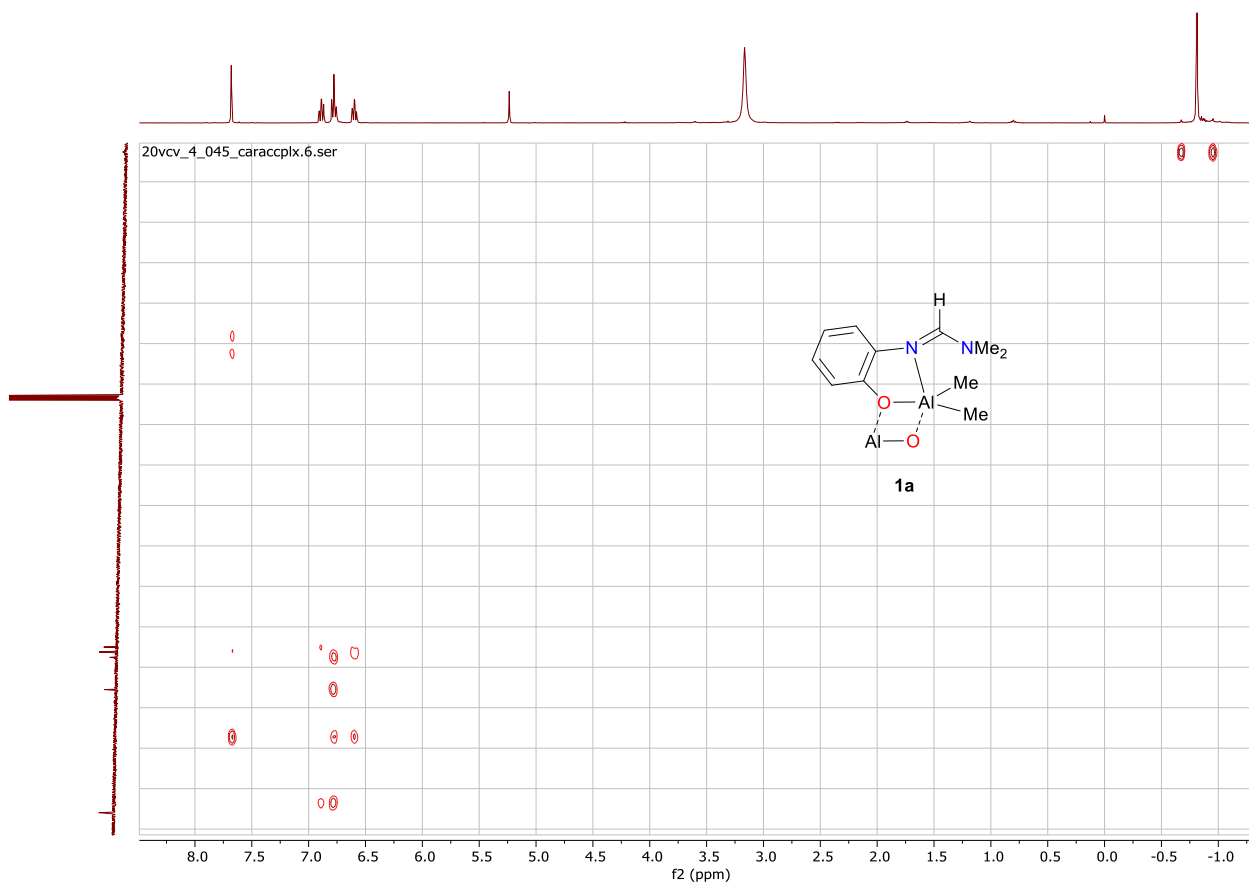

Figure S35  $^1\text{H}$   $^{13}\text{C}$  HMBC (400 MHz / 101 MHz,  $\text{CD}_2\text{Cl}_2$ , 298 K) of **1a**.

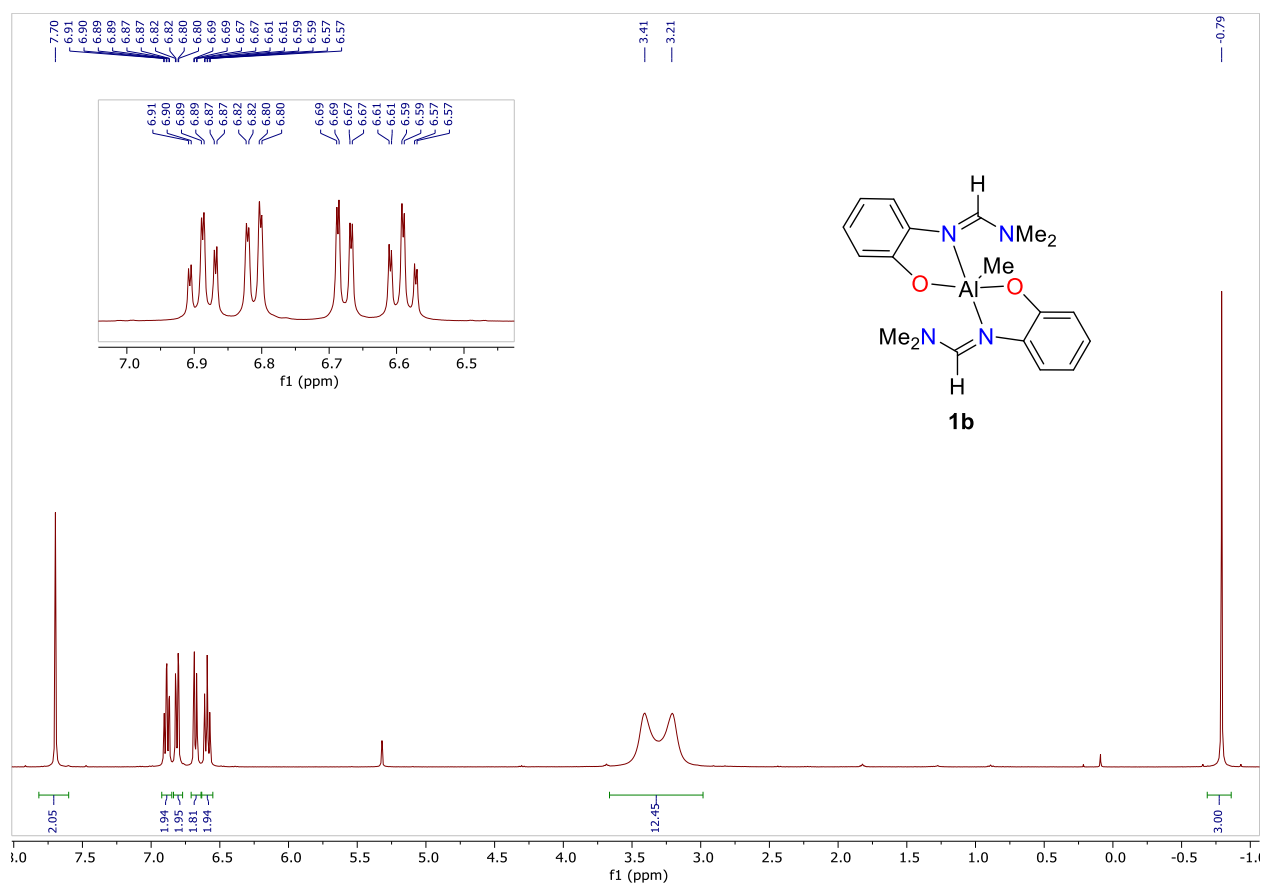

Figure S36  $^1\text{H}$  NMR (400 MHz,  $\text{CD}_2\text{Cl}_2$ , 298 K) of **1b**.

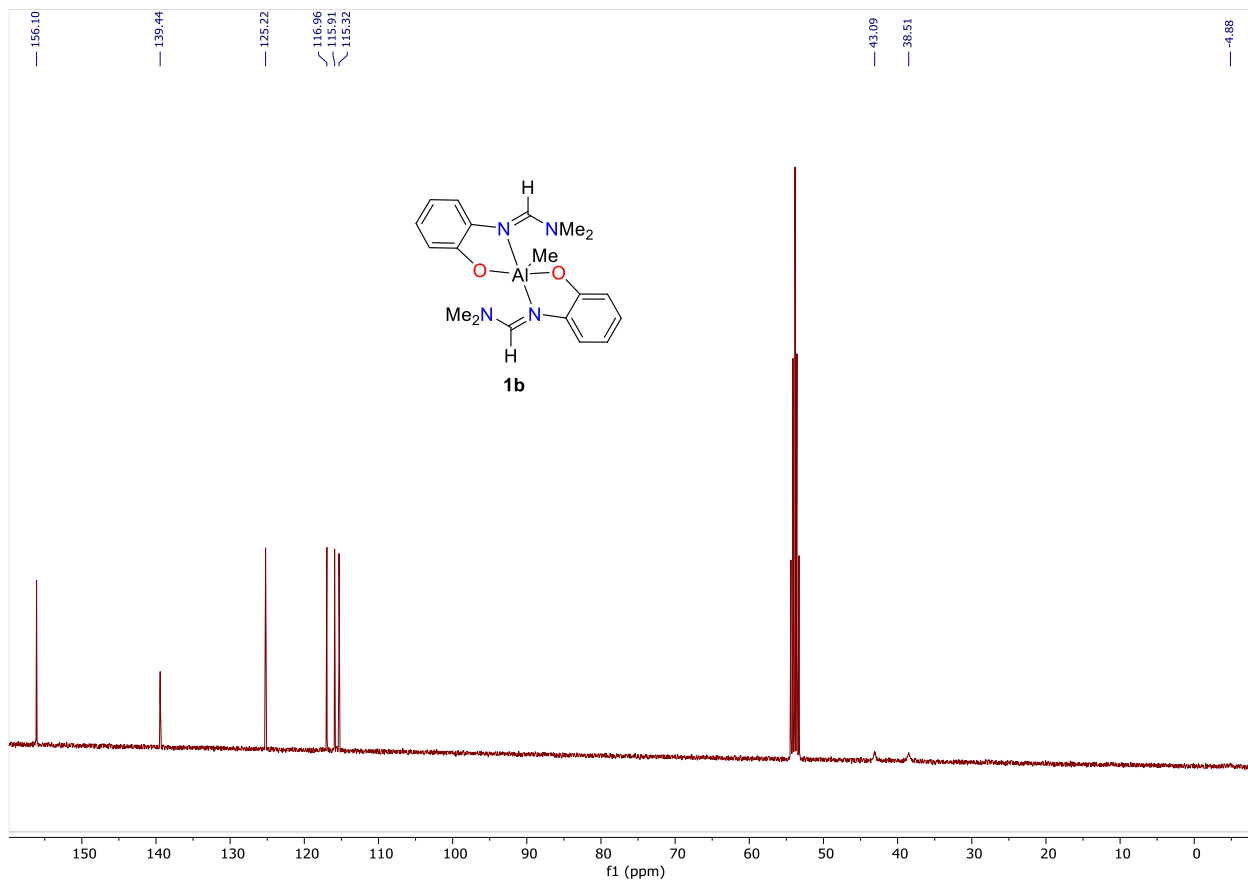

Figure S37  $\{^1\text{H}\}^{13}\text{C}$  NMR (101 MHz,  $\text{CD}_2\text{Cl}_2$ , 298 K) of **1b**.

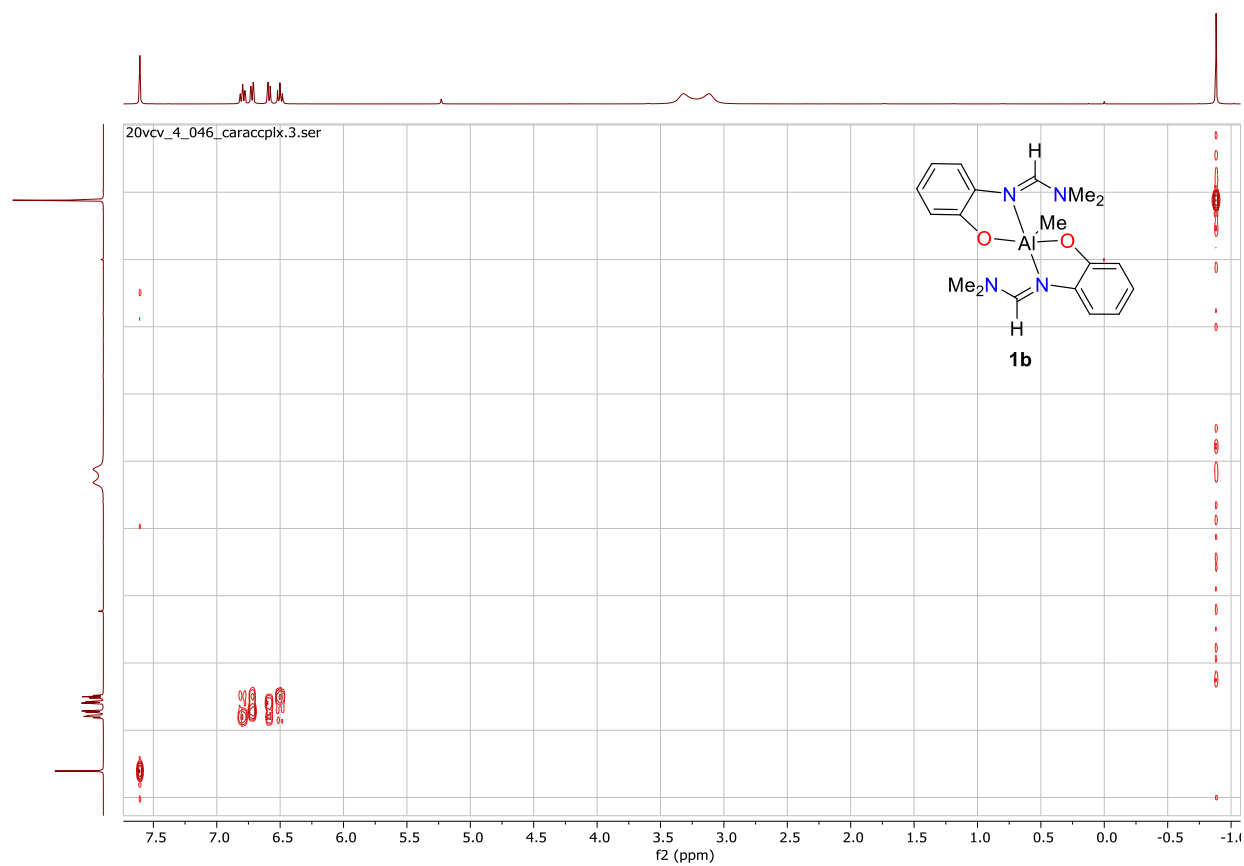

Figure S38  $^1\text{H}$   $^1\text{H}$  COSY (400 MHz,  $\text{CD}_2\text{Cl}_2$ , 298 K) of **1b**.

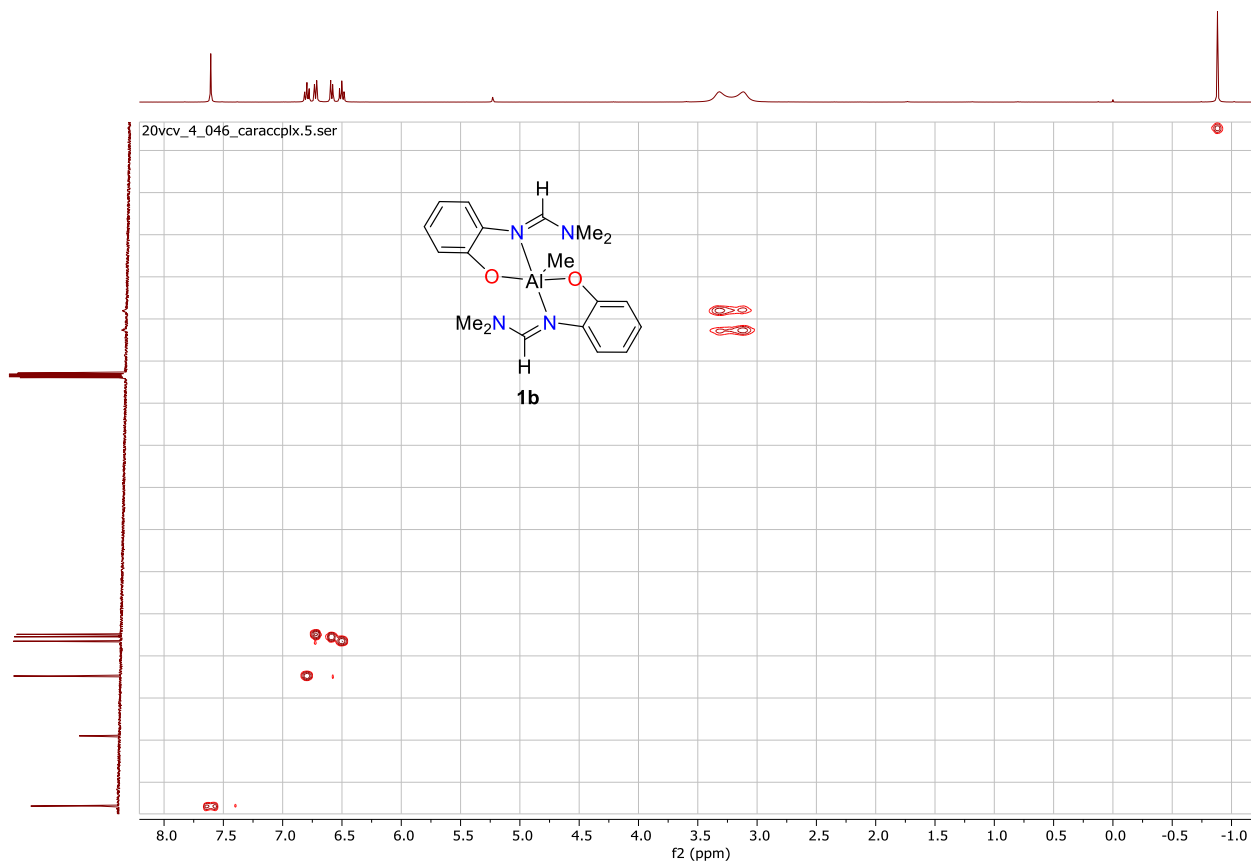

Figure S39  $^1\text{H}$   $^{13}\text{C}$  HSQC (400 MHz / 101 MHz,  $\text{CD}_2\text{Cl}_2$ , 298 K) of **1b**.

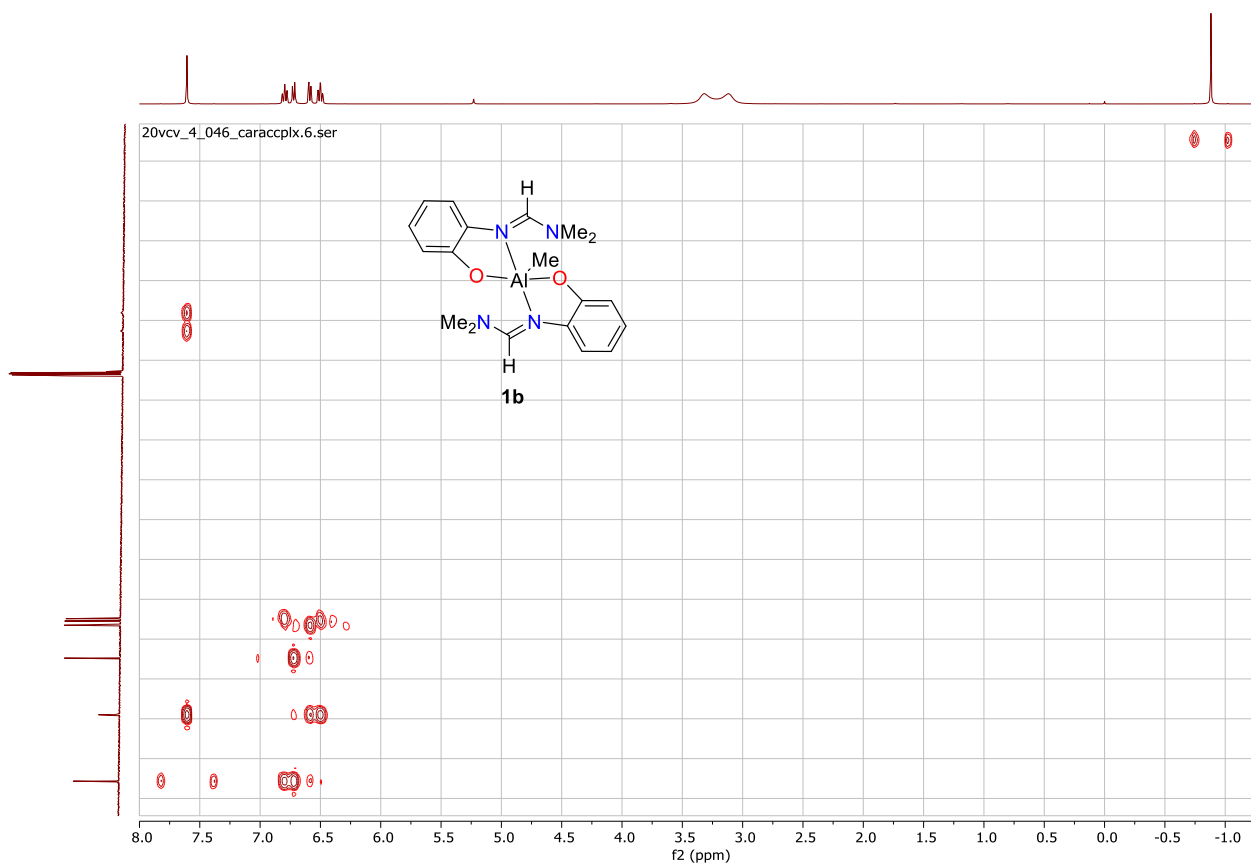

Figure S40  $^1\text{H}$   $^{13}\text{C}$  HMBC (400 MHz / 101 MHz,  $\text{CD}_2\text{Cl}_2$ , 298 K) of **1b**.

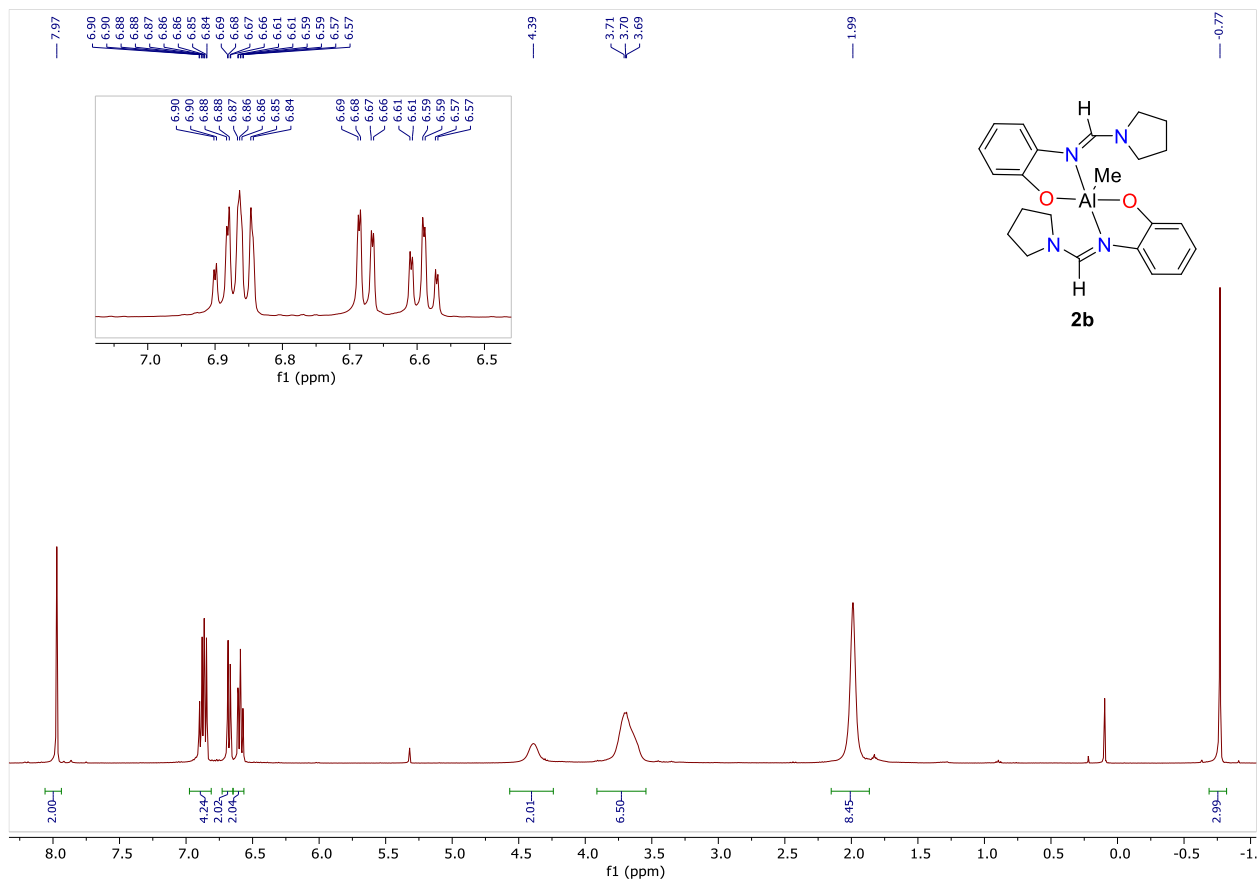

Figure S41  $^1\text{H}$  NMR (400 MHz,  $\text{CD}_2\text{Cl}_2$ , 298 K) of **2b**.

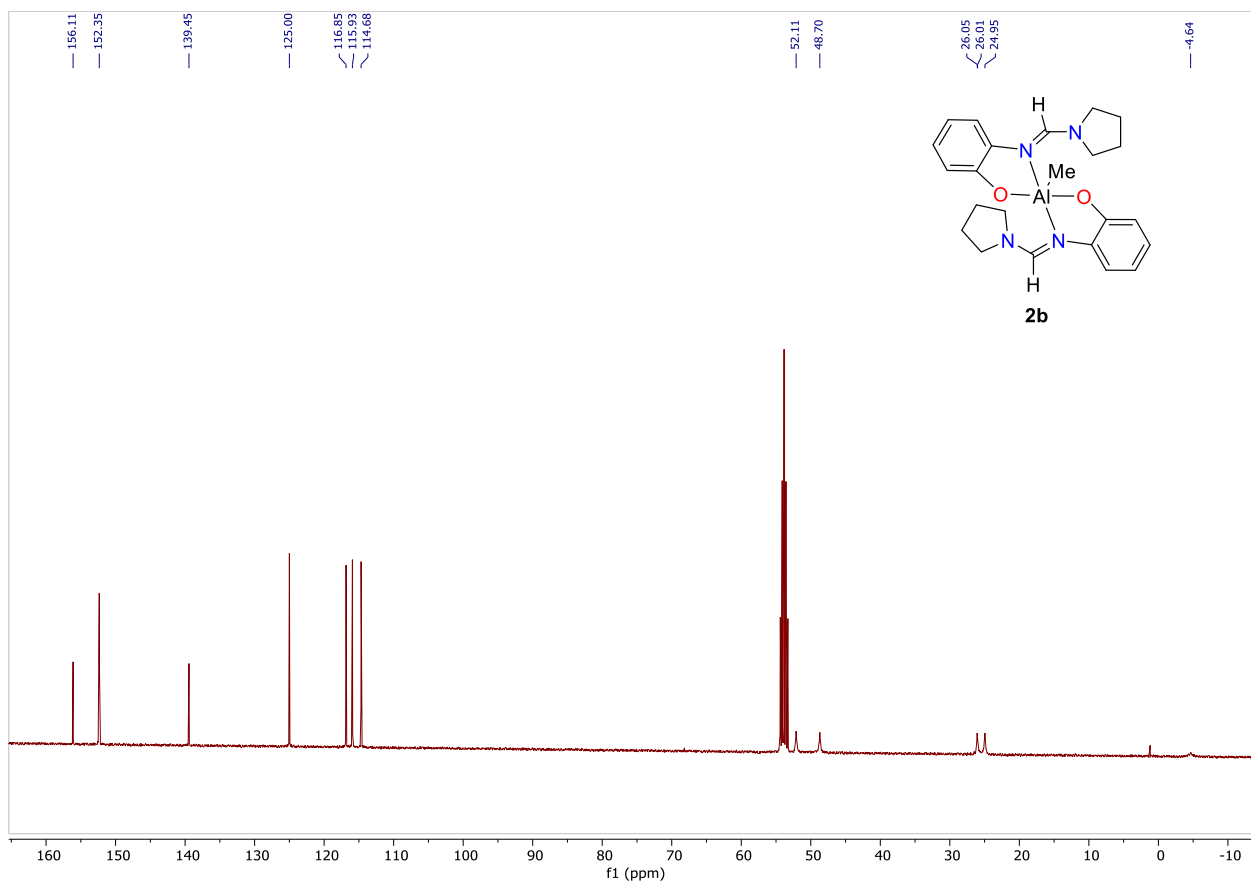

Figure S42  $\{^1\text{H}\}^{13}\text{C}$  NMR (101 MHz,  $\text{CD}_2\text{Cl}_2$ , 298 K) of **2b**.

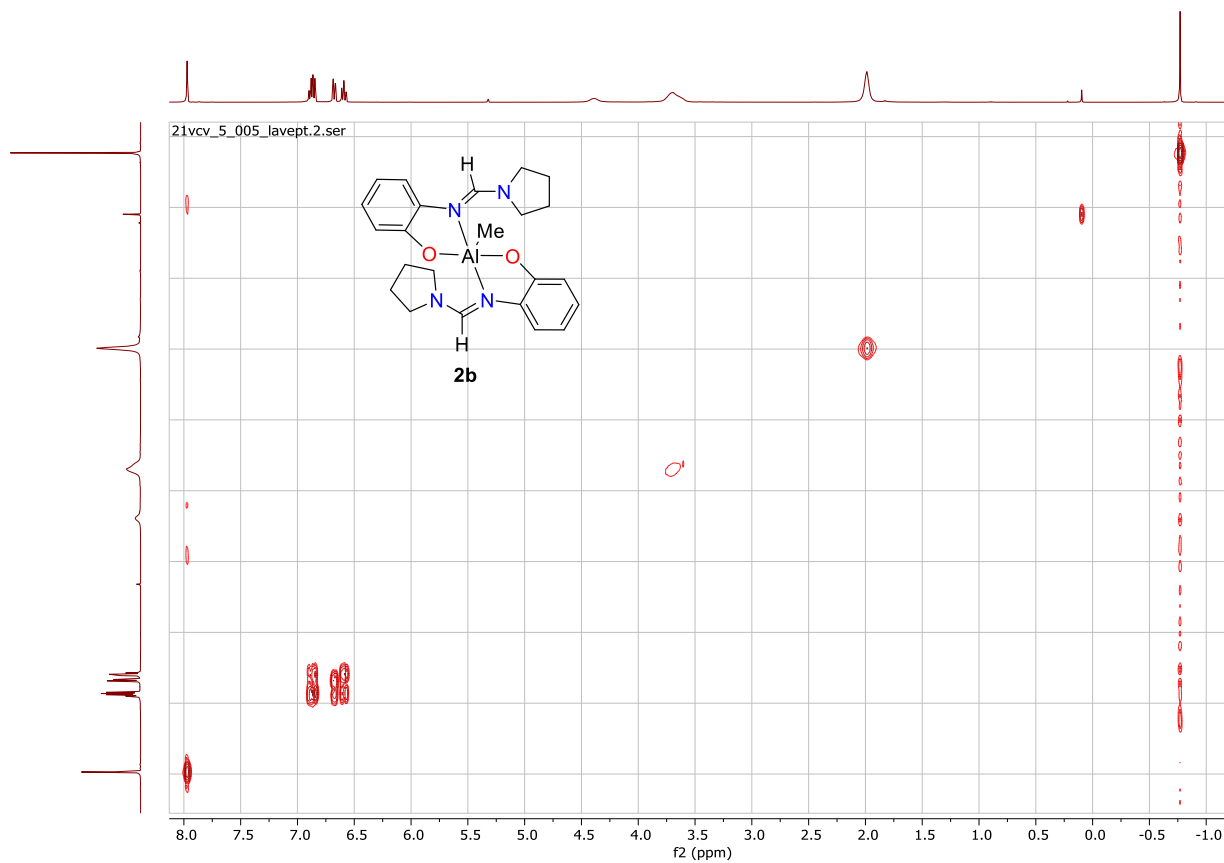

Figure S43  $^1\text{H}$   $^1\text{H}$  COSY (400 MHz,  $\text{CD}_2\text{Cl}_2$ , 298 K) of **2b**.

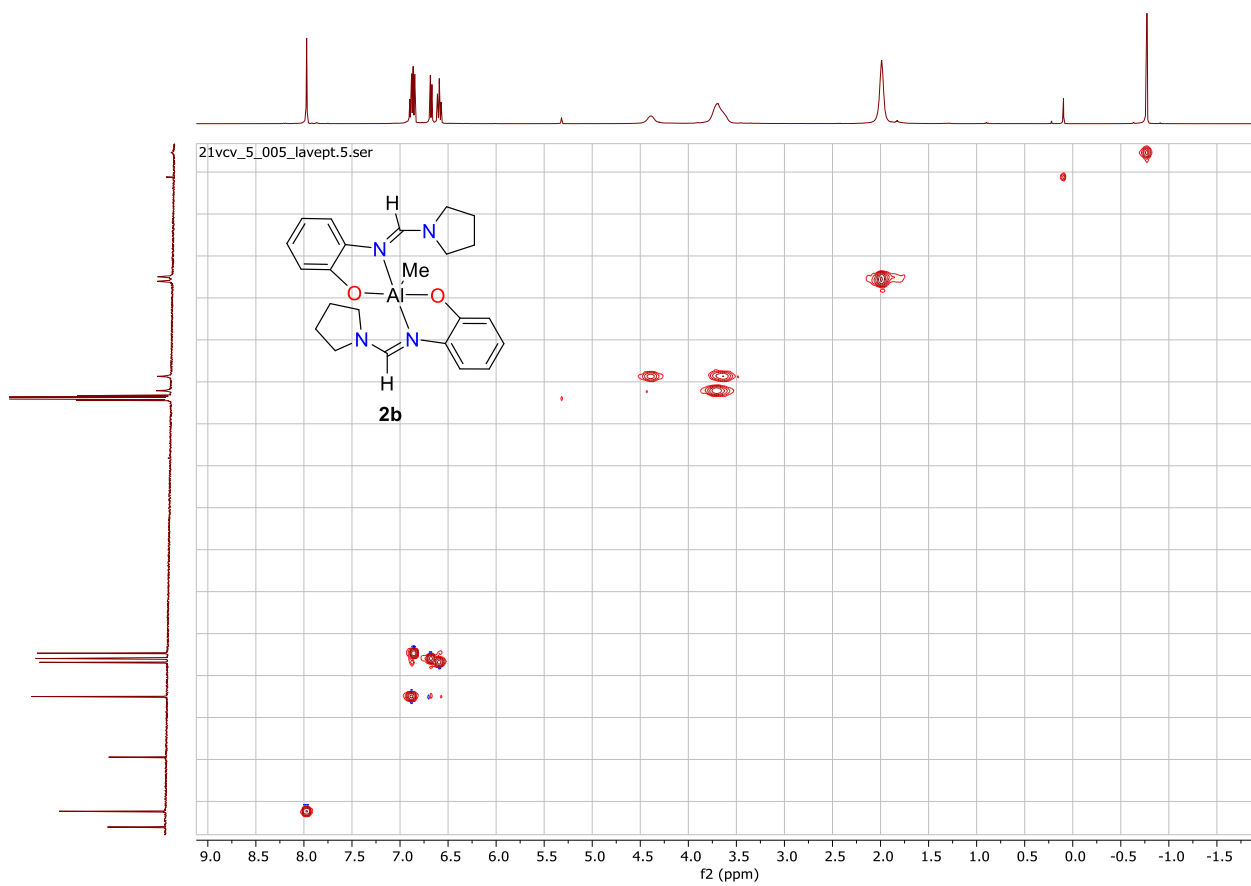

Figure S44  $^1\text{H}$   $^{13}\text{C}$  HSQC (400 MHz / 101 MHz,  $\text{CD}_2\text{Cl}_2$ , 298 K) of **2b**.

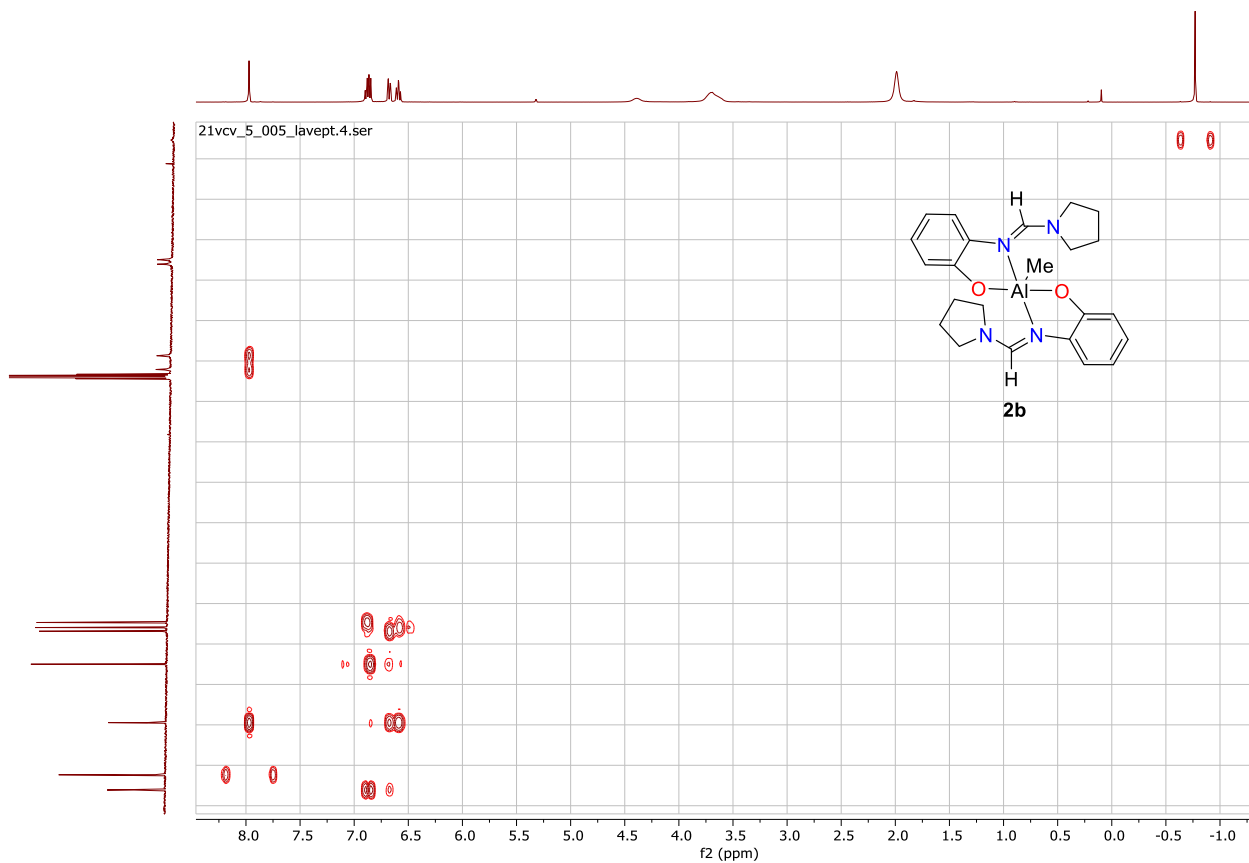

Figure S45  $^1\text{H}$   $^{13}\text{C}$  HMBC (400 MHz / 101 MHz,  $\text{CD}_2\text{Cl}_2$ , 298 K) of **2b**.

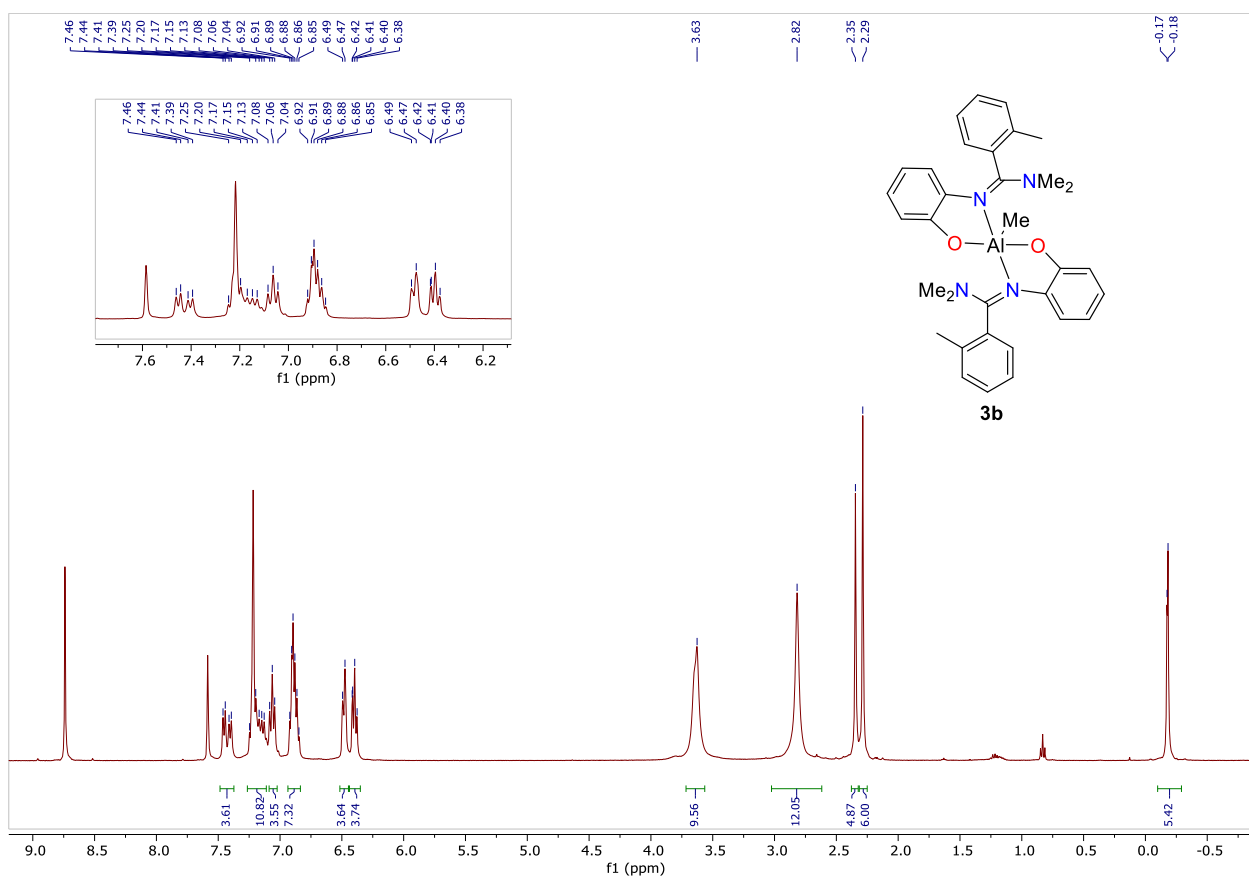

Figure S46  $^1\text{H}$  NMR (400 MHz,  $\text{C}_5\text{D}_5\text{N}$ , 298 K) of **3b**.



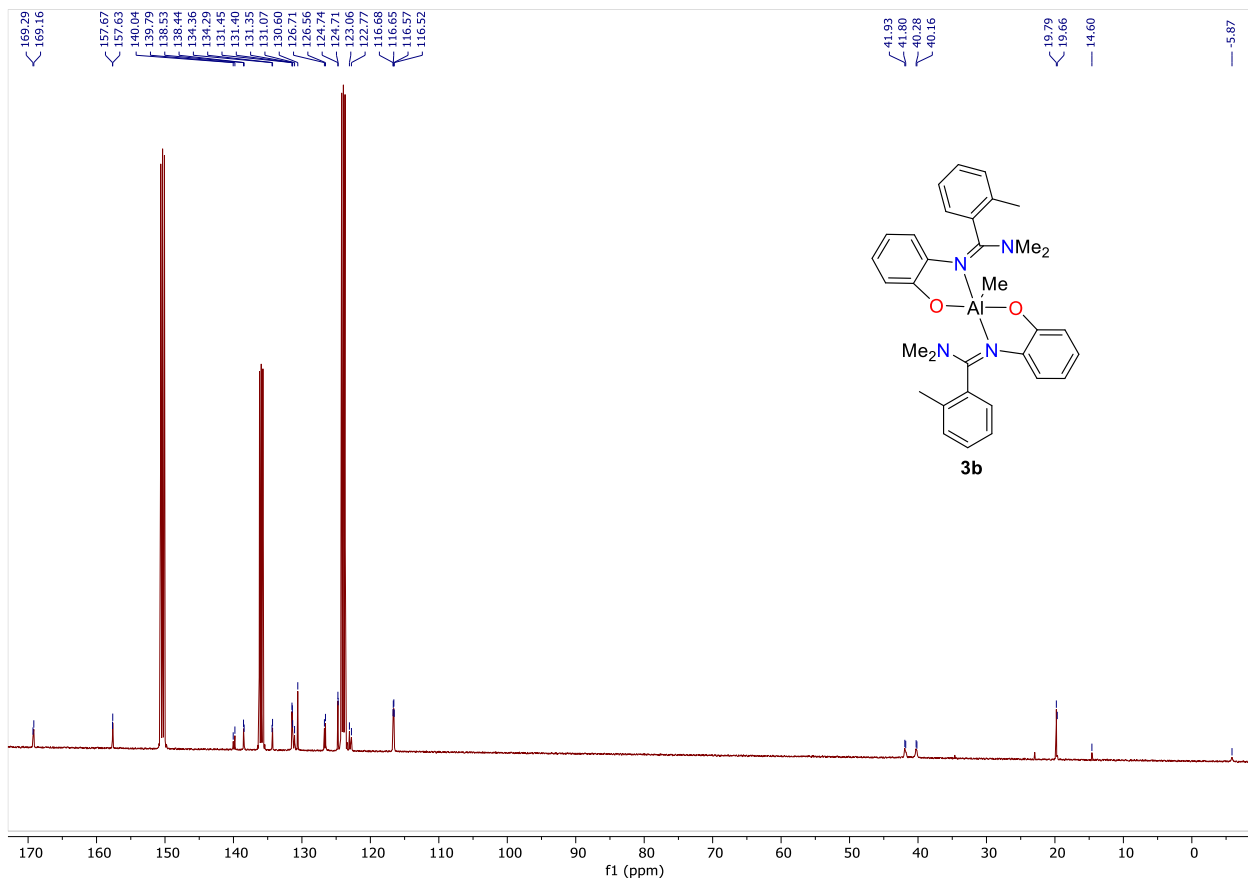

Figure S47  $\{^1\text{H}\}^{13}\text{C}$  NMR (101 MHz,  $\text{C}_5\text{D}_5\text{N}$ , 298 K) of **3b**.

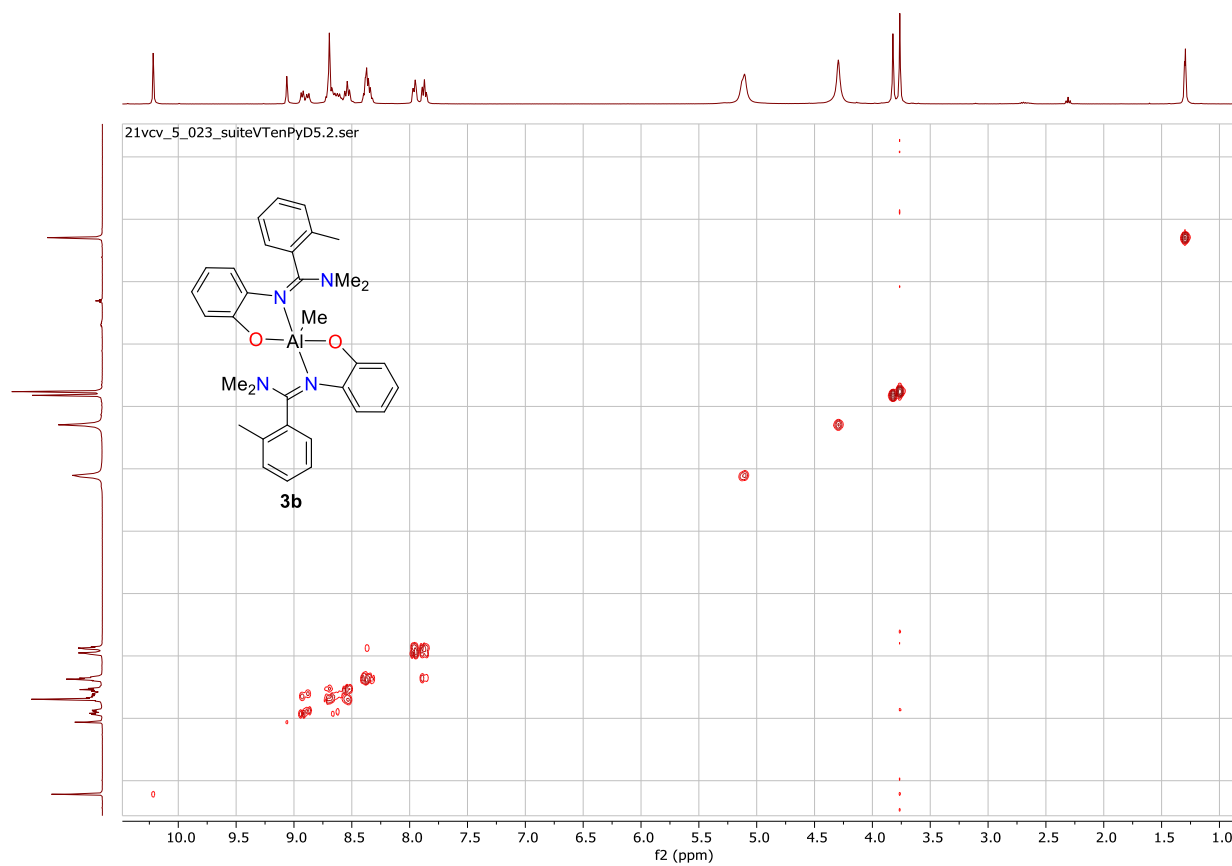

Figure S48  $^1\text{H} \ ^1\text{H}$  COSY (400 MHz,  $\text{C}_5\text{D}_5\text{N}$ , 298 K) of **3b**.

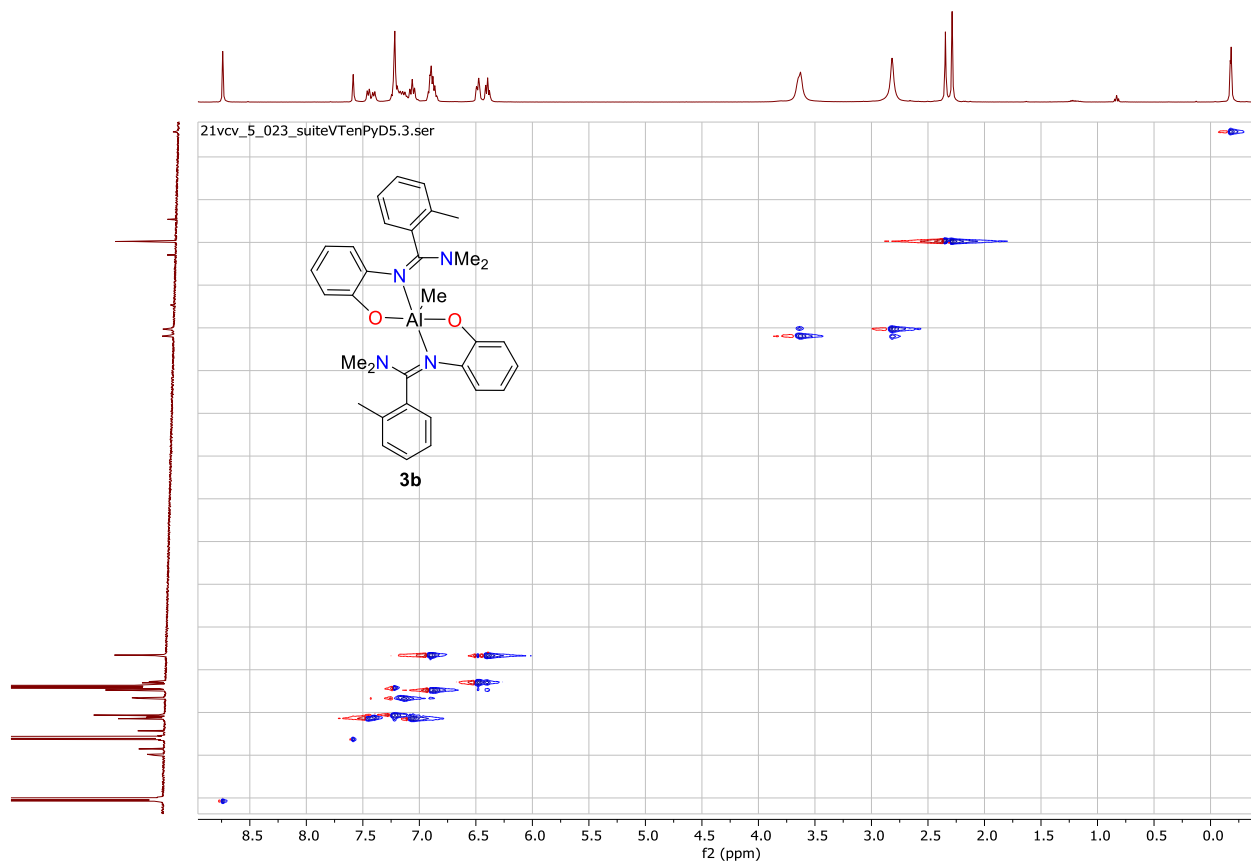

Figure S49  $^1\text{H}$   $^{13}\text{C}$  HSQC (400 MHz / 101 MHz,  $\text{C}_5\text{D}_5\text{N}$ , 298 K) of **3b**.

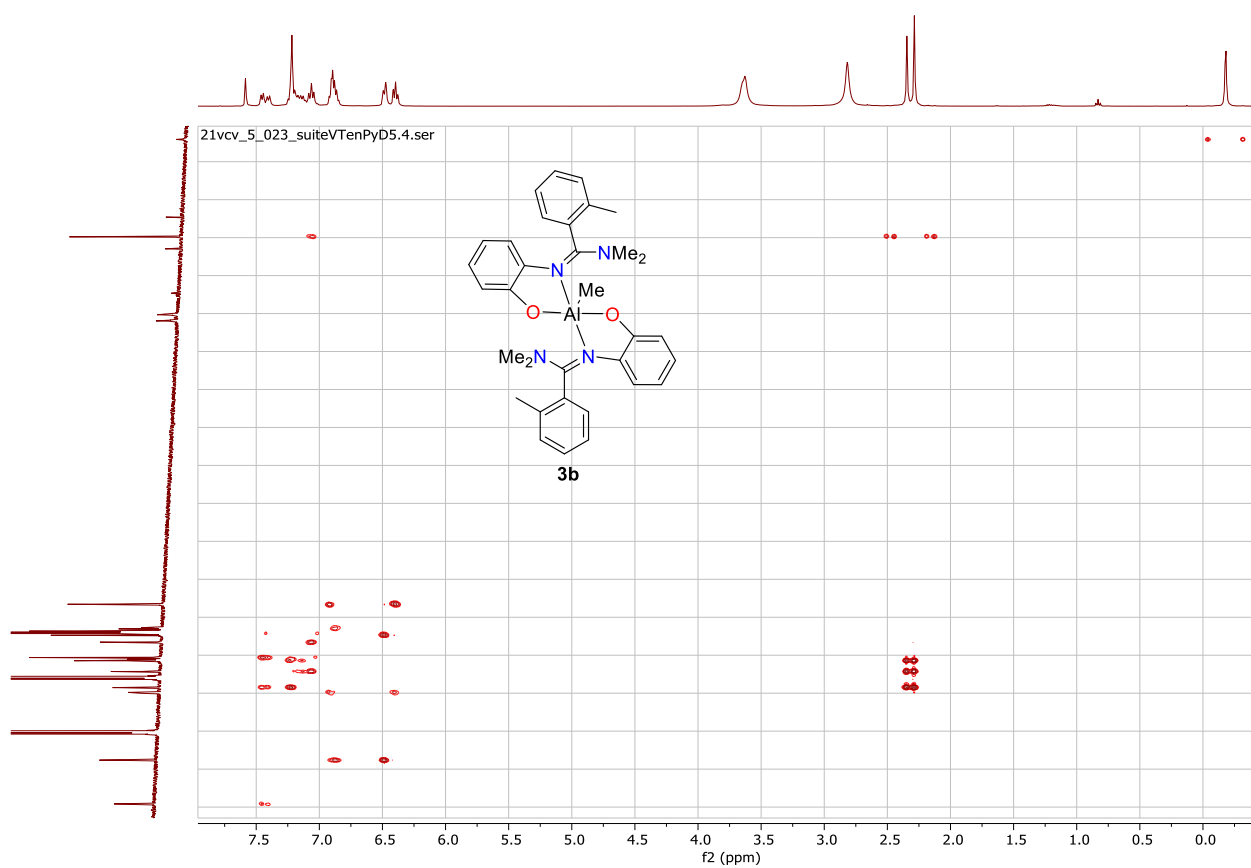

Figure S50  $^1\text{H}$   $^{13}\text{C}$  HMBC (400 MHz / 101 MHz,  $\text{C}_5\text{D}_5\text{N}$ , 298 K) of **3b**.

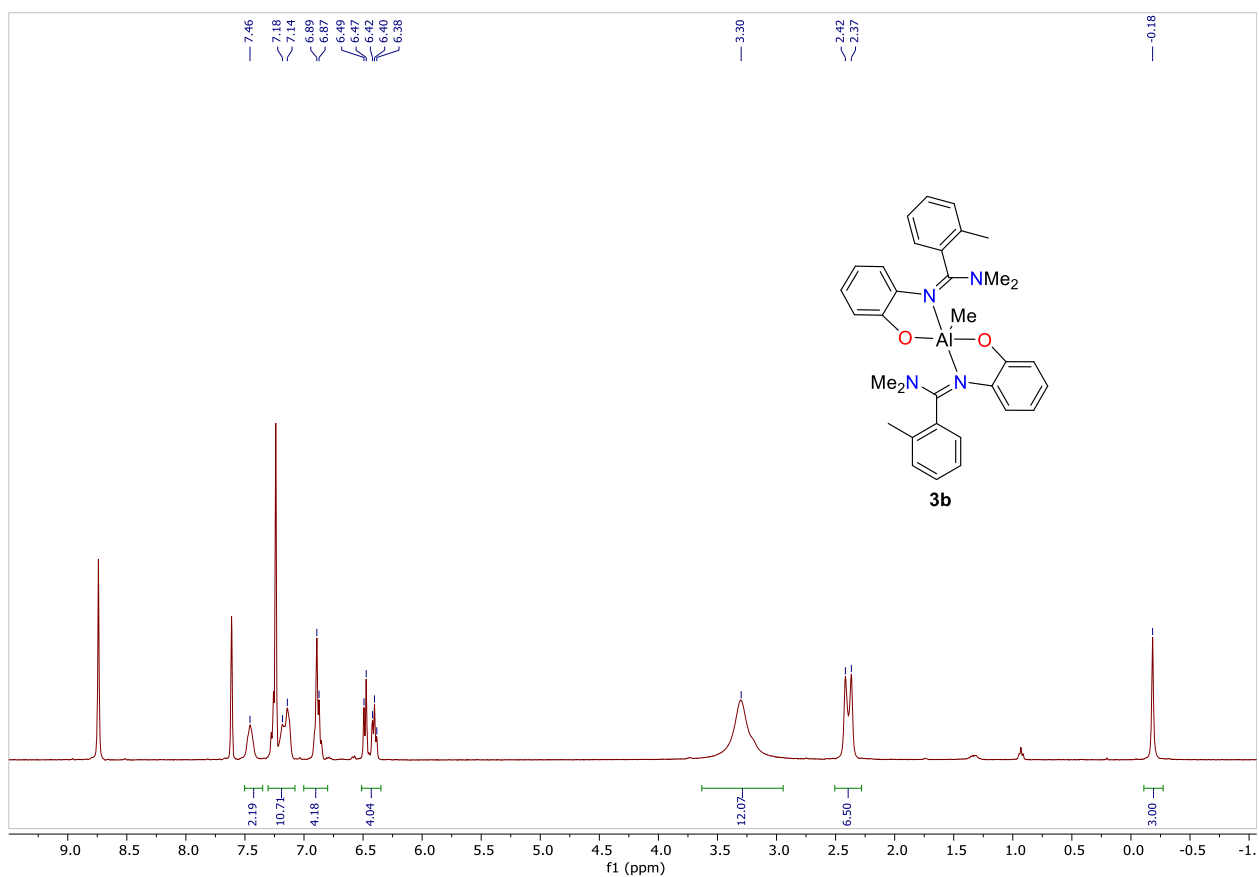

Figure S51  $^1\text{H}$  NMR (400 MHz,  $\text{C}_5\text{D}_5\text{N}$ , 383 K) of **3b**.

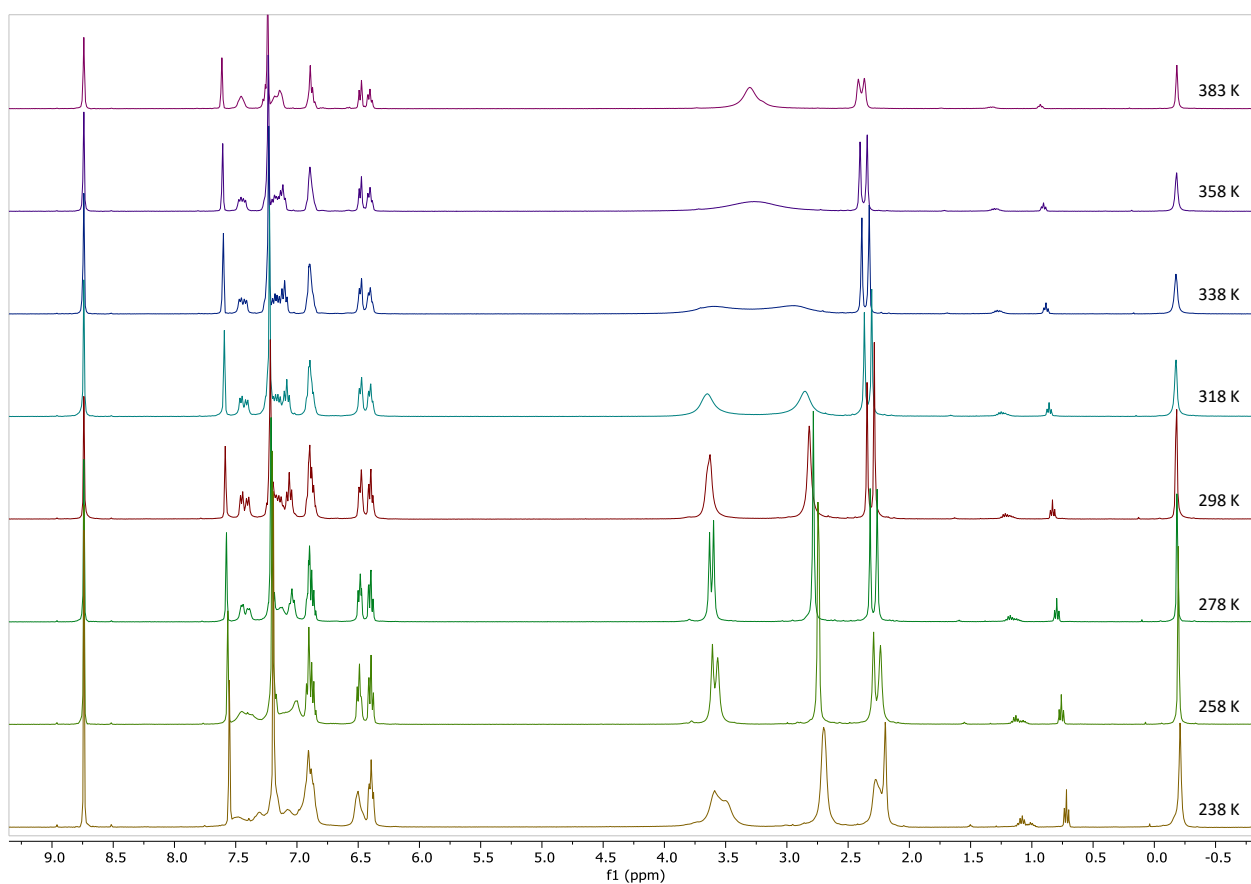

Figure S52 Variable Temperature  $^1\text{H}$  NMR (400 MHz,  $\text{C}_5\text{D}_5\text{N}$ ) of **3b**.

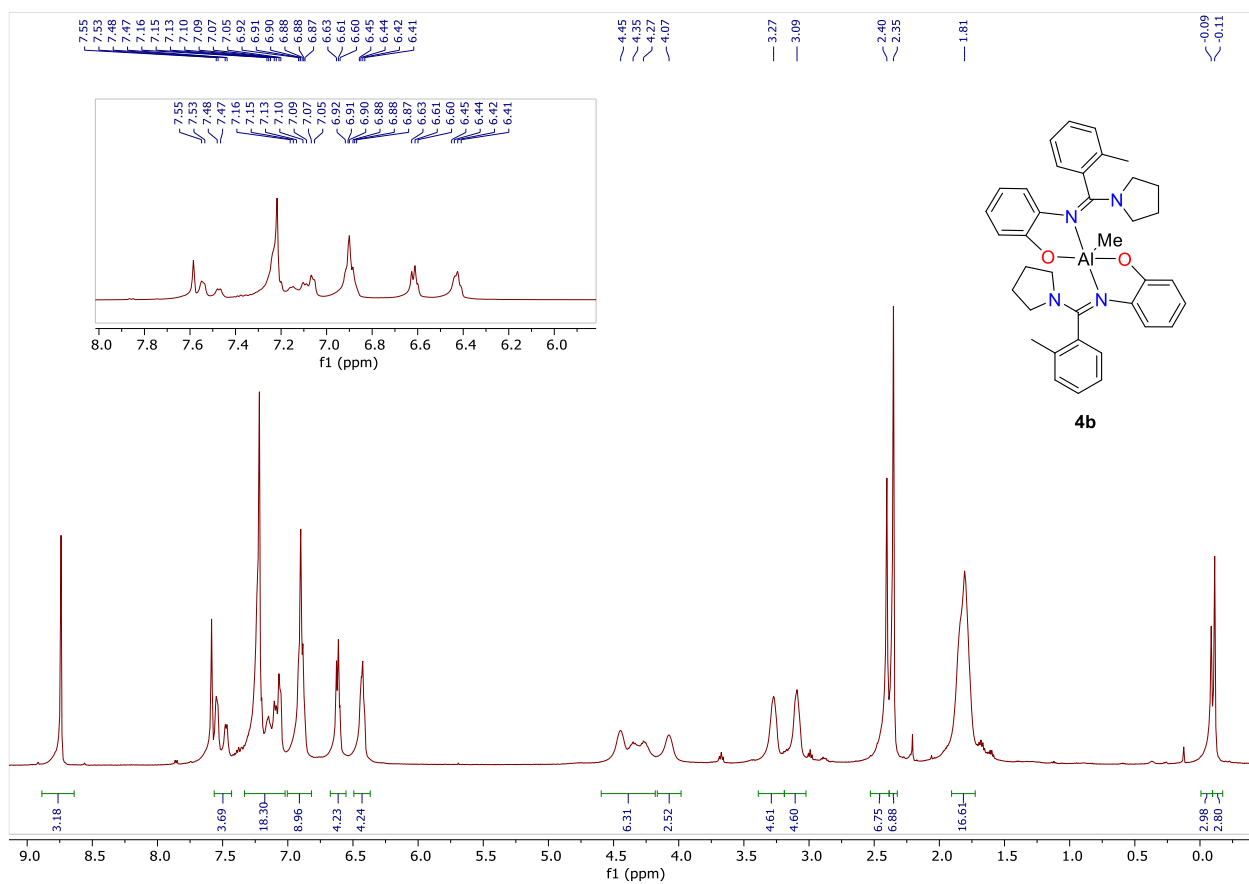

Figure S53  $^1\text{H}$  NMR (400 MHz,  $\text{C}_5\text{D}_5\text{N}$ , 298 K) of **4b**.

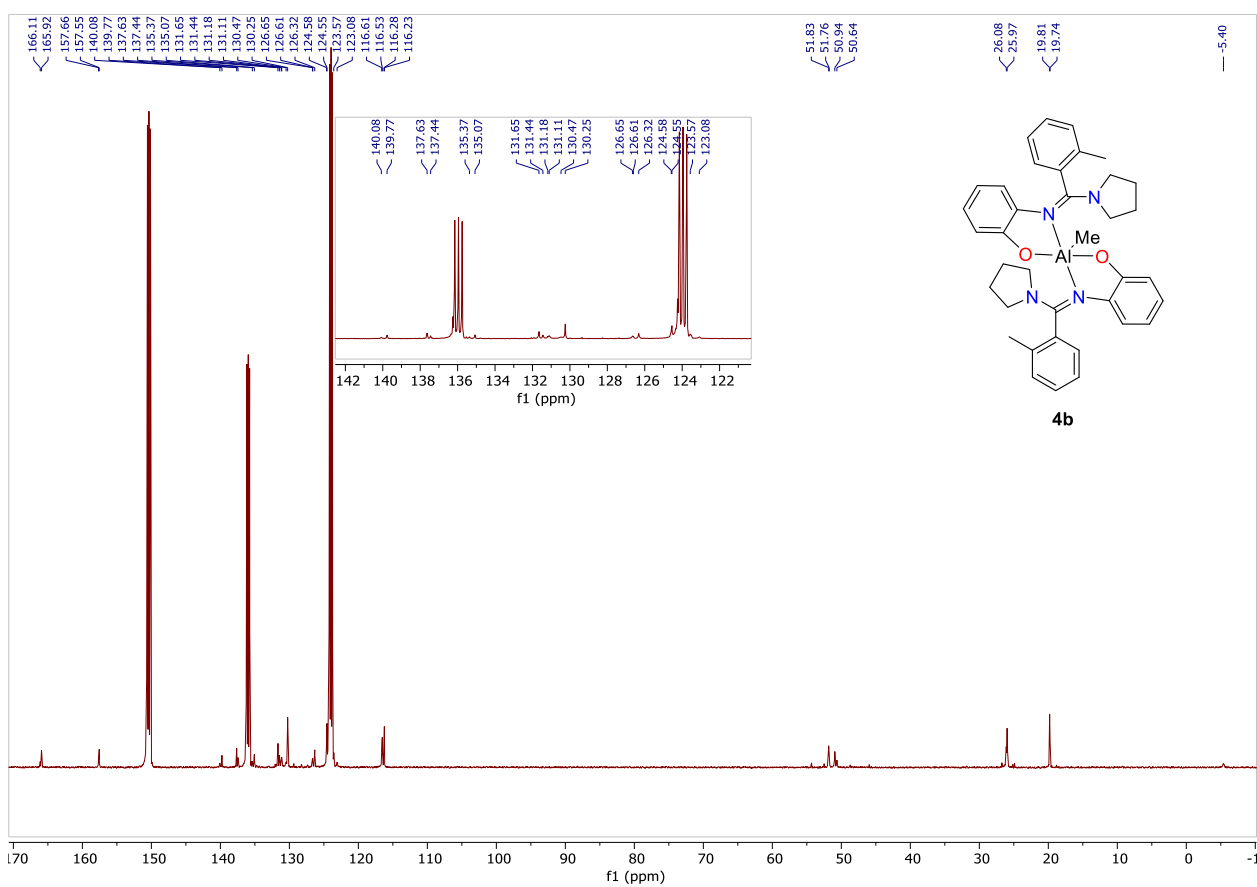

Figure S54  $\{^1\text{H}\}^{13}\text{C}$  NMR (101 MHz,  $\text{C}_5\text{D}_5\text{N}$ , 298 K) of **4b**.

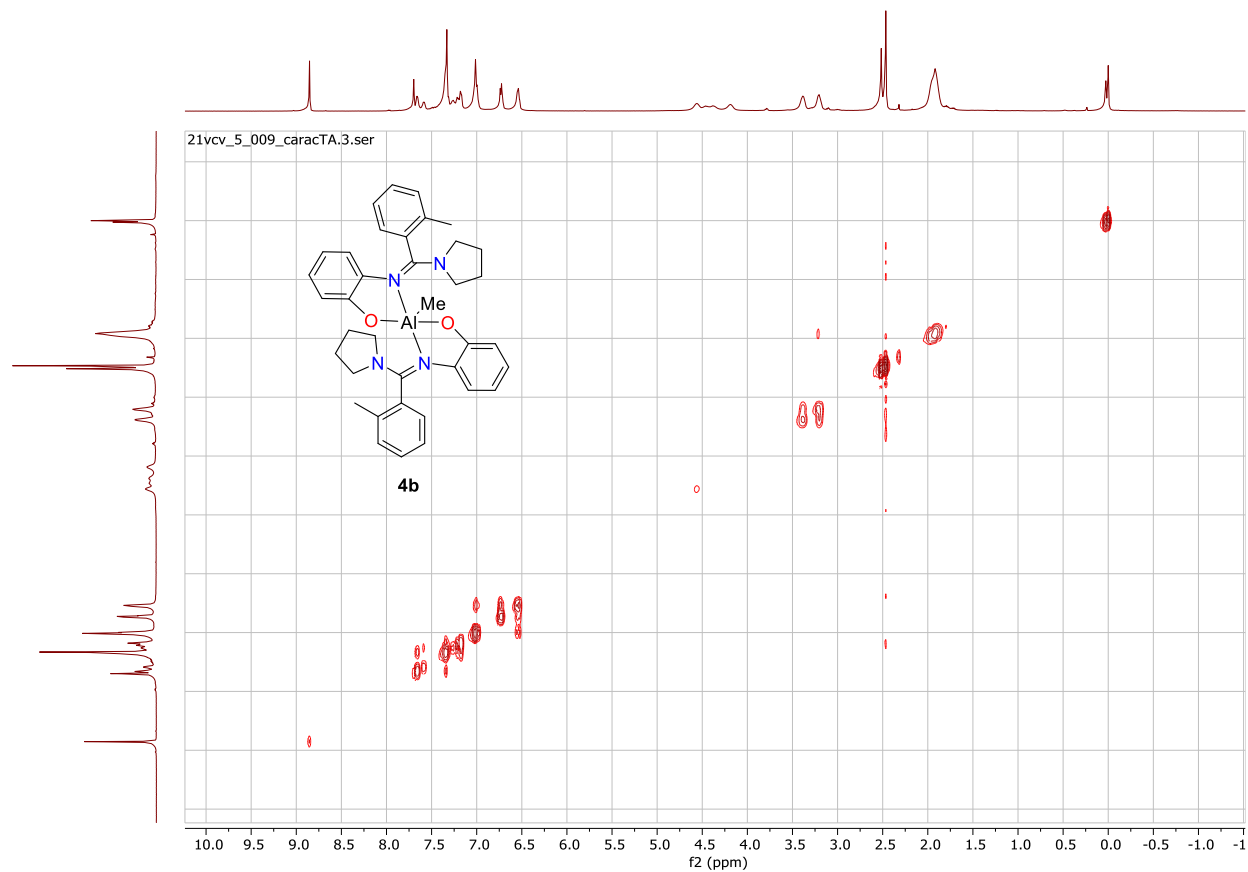

Figure S55  $^1\text{H}$   $^1\text{H}$  COSY (400 MHz,  $\text{C}_5\text{D}_5\text{N}$ , 298 K) of **4b**.

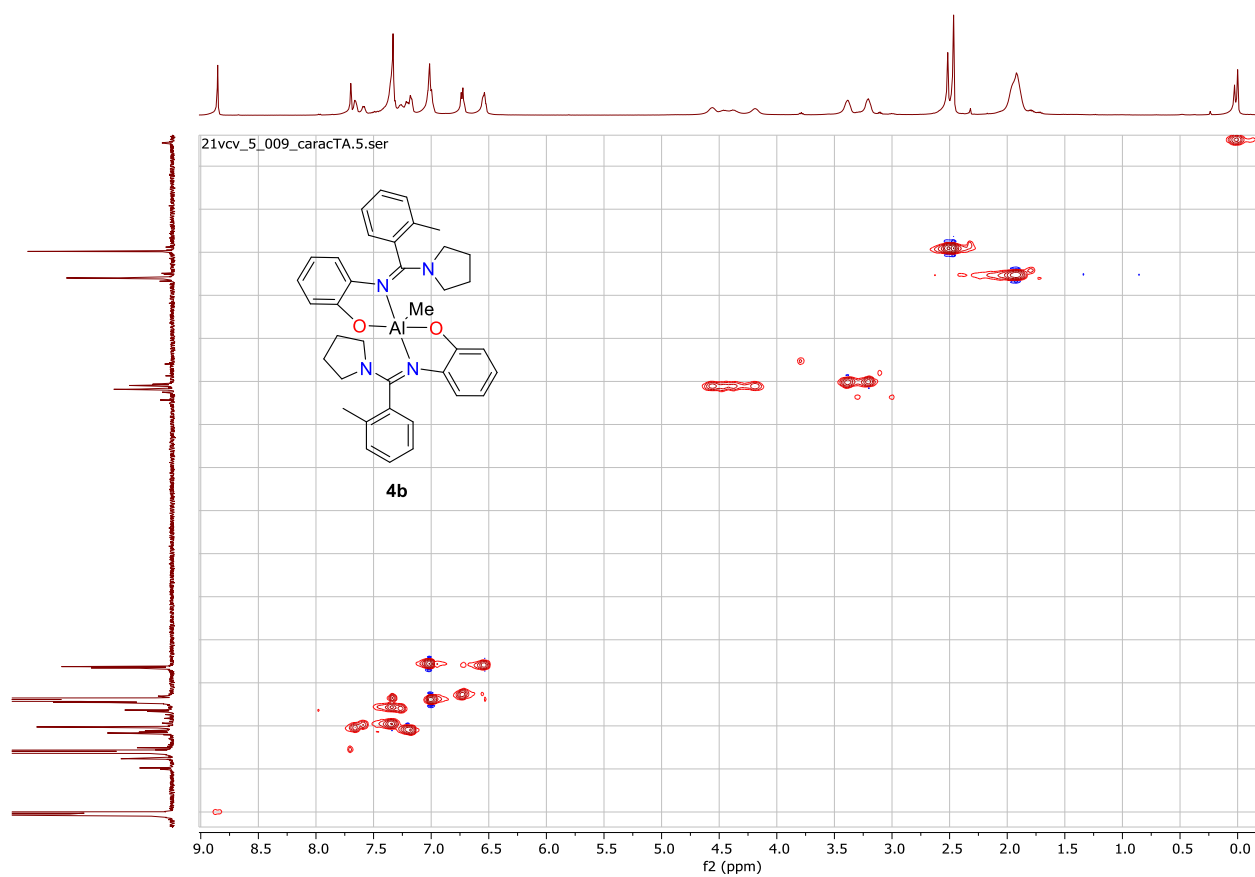

Figure S56  $^1\text{H}$   $^{13}\text{C}$  HSQC (400 MHz / 101 MHz,  $\text{C}_5\text{D}_5\text{N}$ , 298 K) of **4b**.

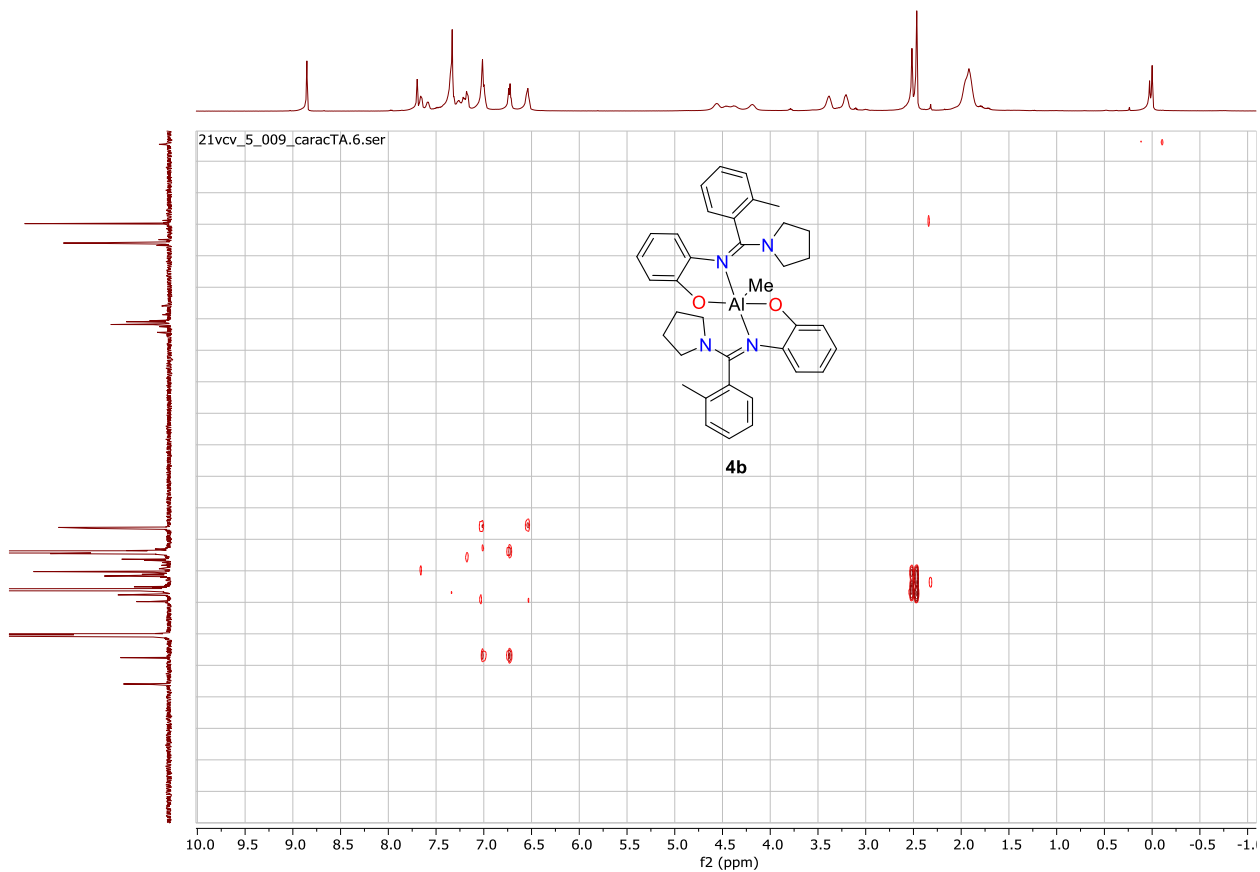

Figure S57  $^1\text{H}$   $^{13}\text{C}$  HMBC (400 MHz / 101 MHz,  $\text{C}_5\text{D}_5\text{N}$ , 298 K) of **4b**.

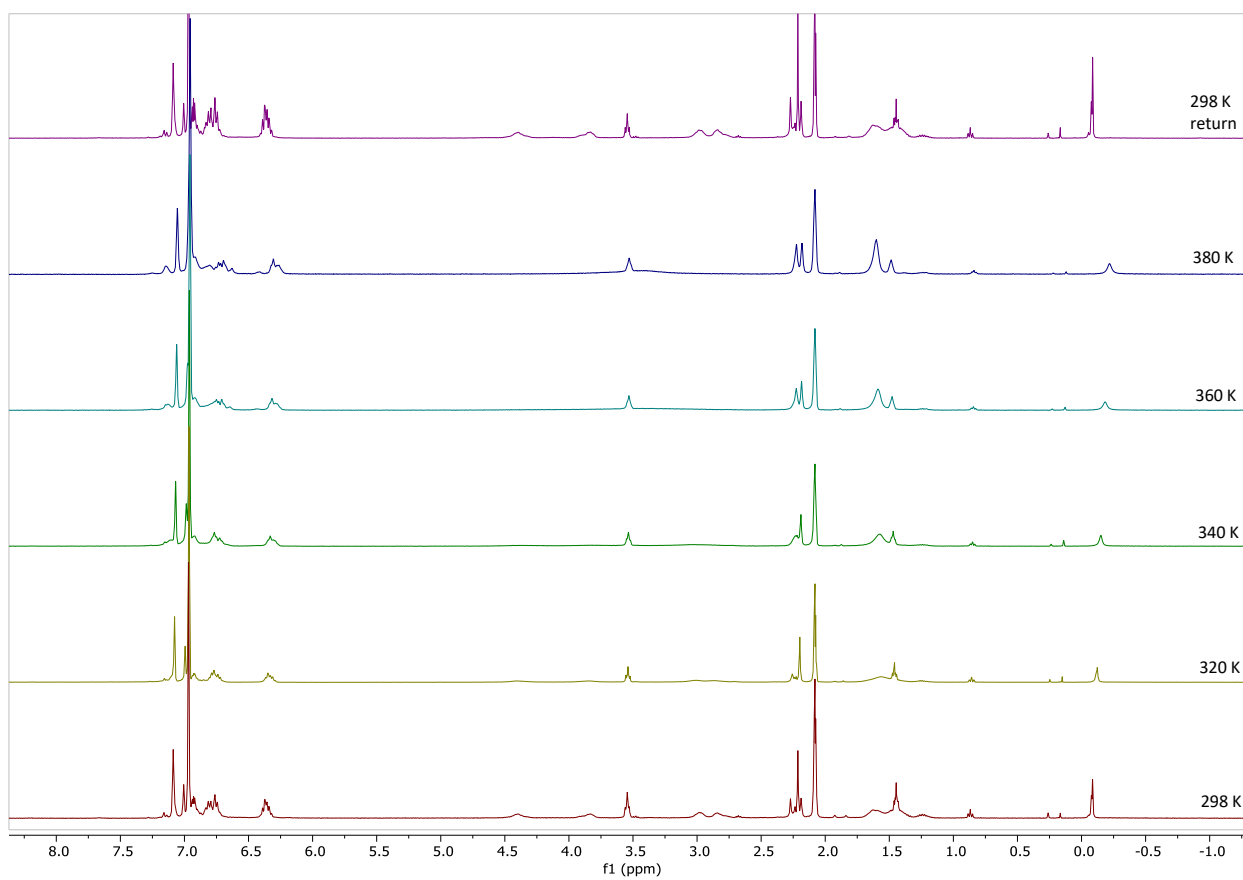

Figure S58 Variable Temperature  $^1\text{H}$  NMR (400 MHz,  $\text{Toluene-d}_8$ ) of **4b**.

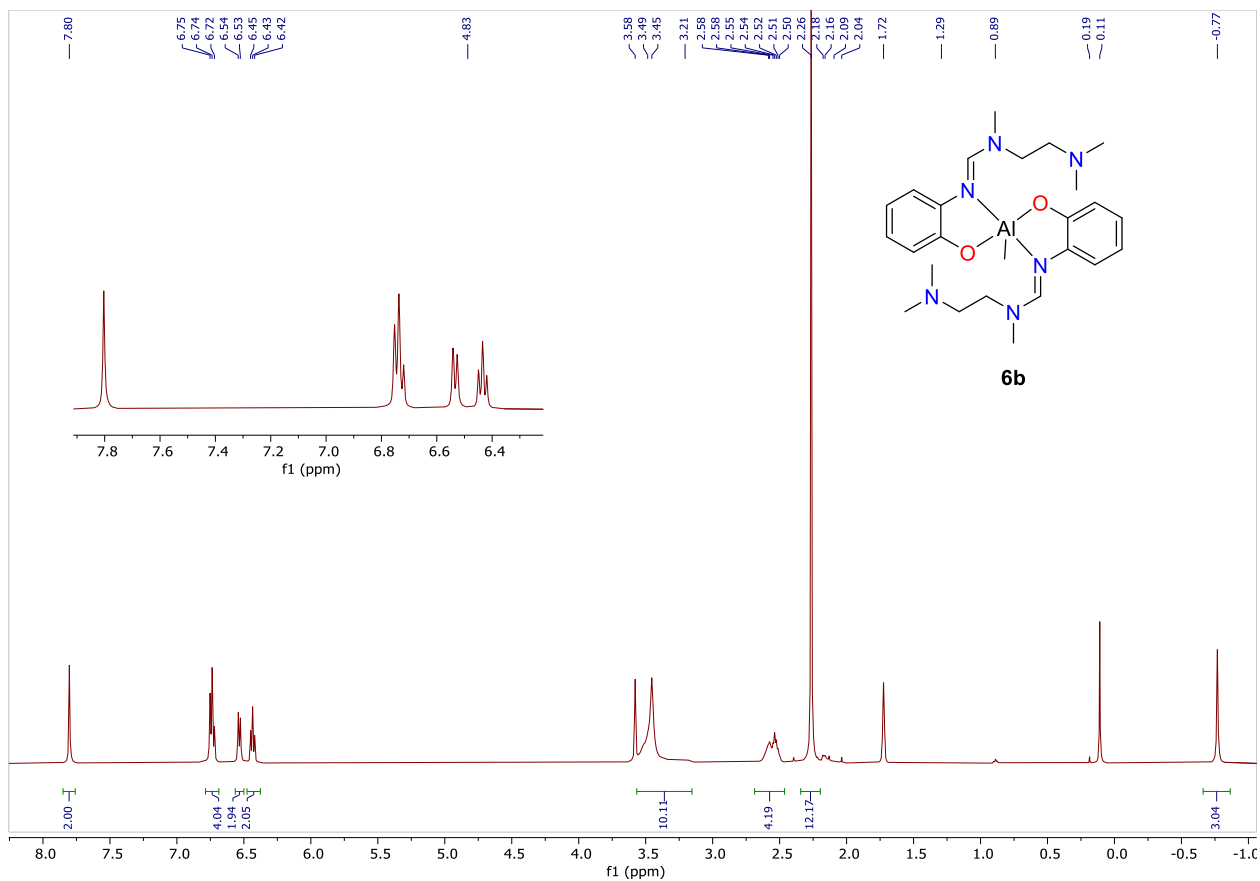

Figure S59  $^1\text{H}$  NMR (500 MHz, THF- $d_8$ , 298 K) of **6b**.

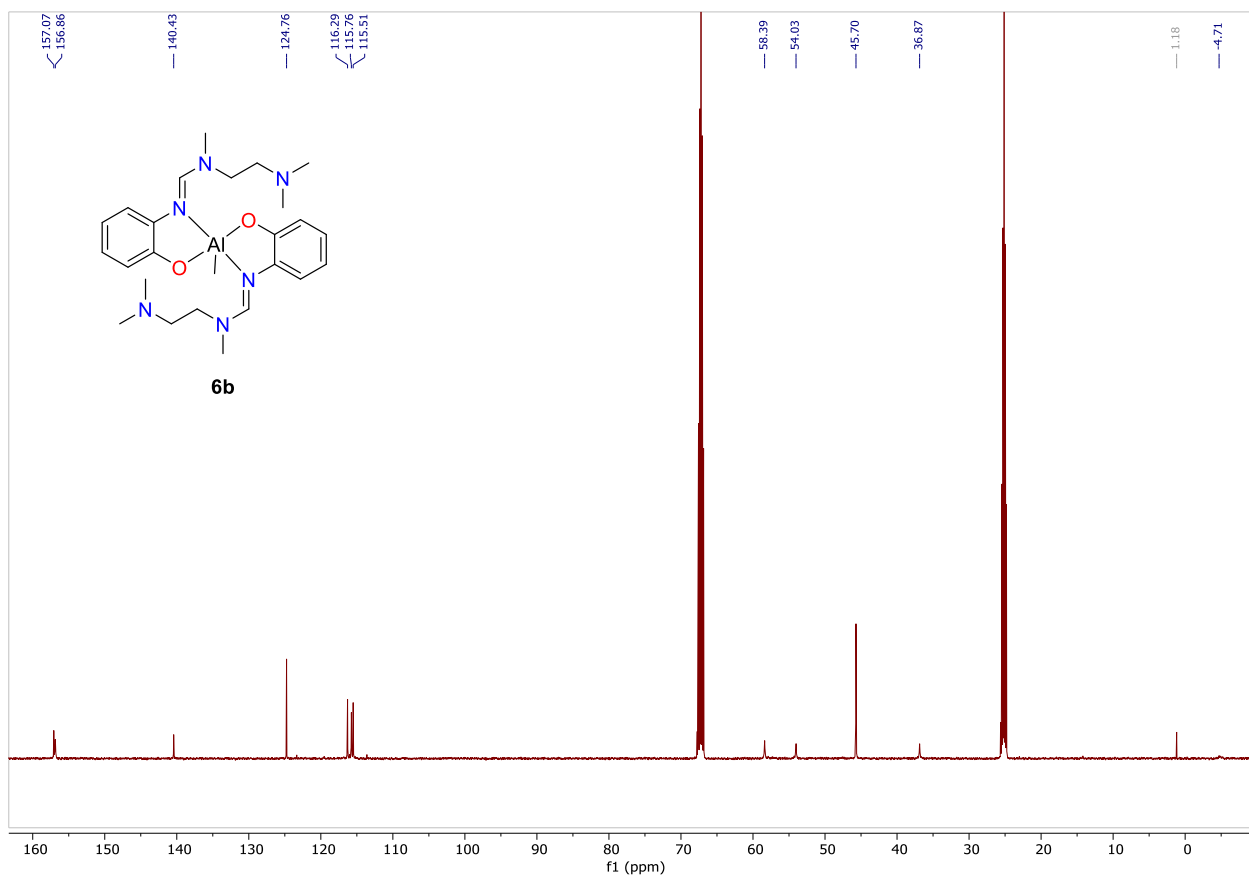

Figure S60  $\{^1\text{H}\}^{13}\text{C}$  (125 MHz, THF- $d_8$ , 298 K) of **6b**.

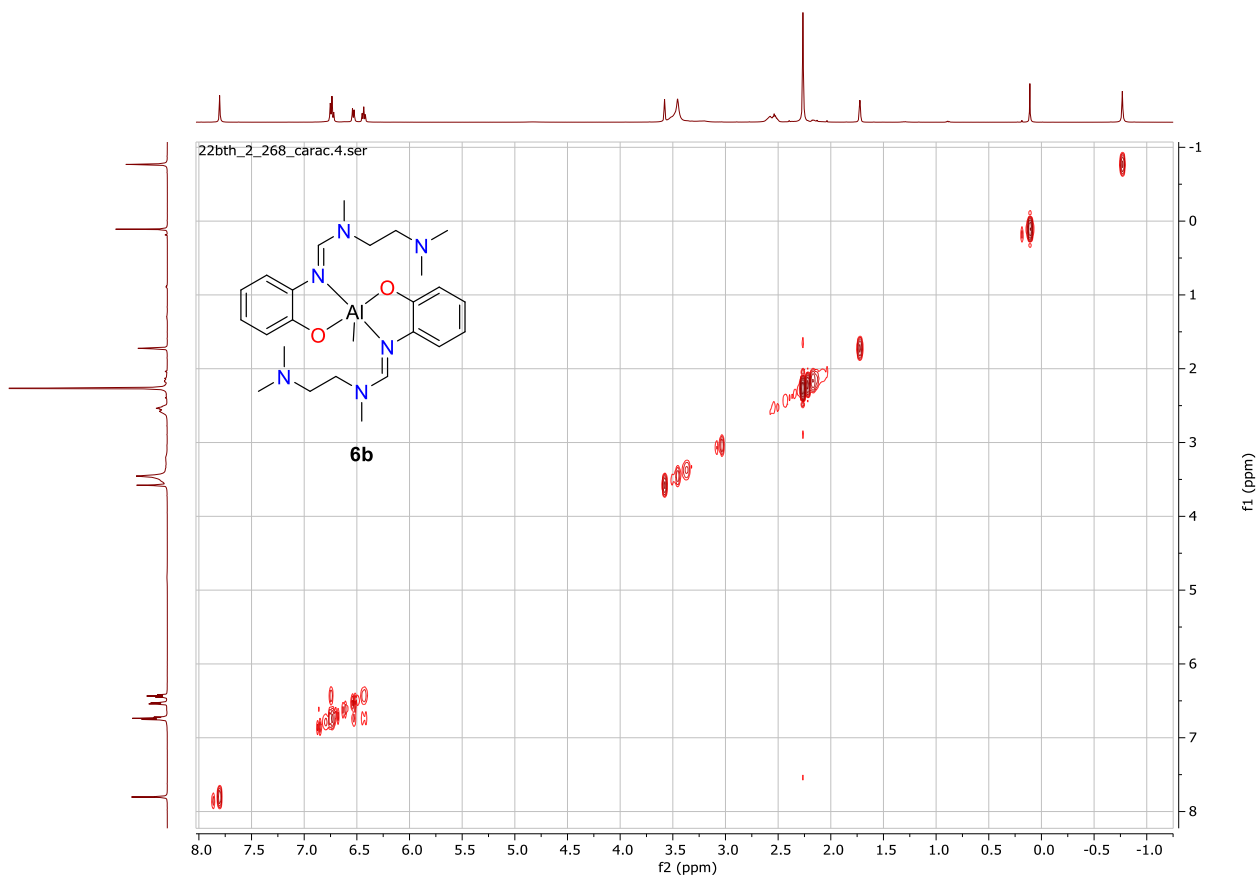

Figure S61  $^1\text{H}$   $^1\text{H}$  COSY (500 MHz / 500 MHz, THF-d8, 298 K) of **6b**.

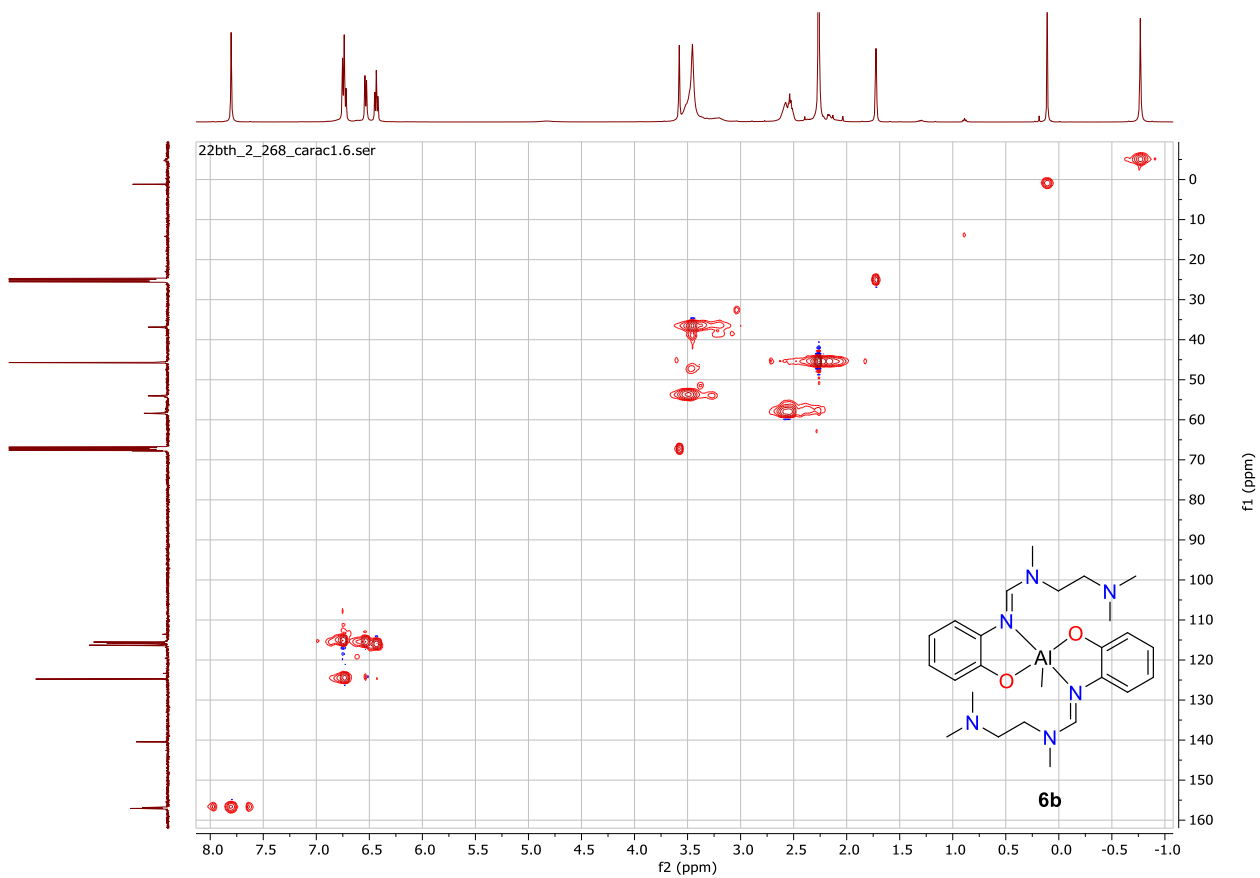

Figure S62  $^1\text{H}$   $^{13}\text{C}$  HSCQ (500 MHz / 125 MHz, THF-d8, 298 K) of **6b**.



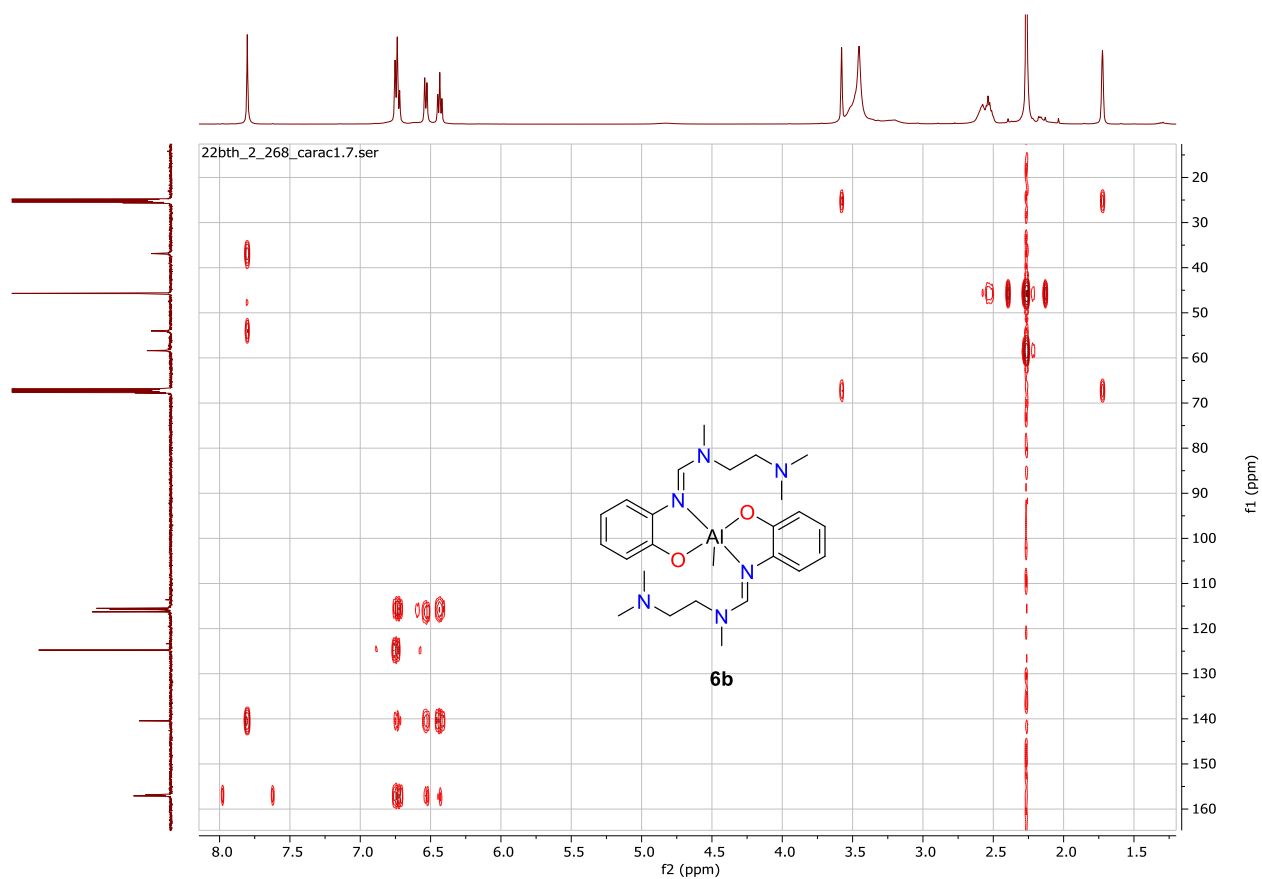

Figure S63  $^1\text{H}$   $^{13}\text{C}$  HMBC (500 MHz / 125 MHz, THF- $d_8$ , 298 K) of **6b**.

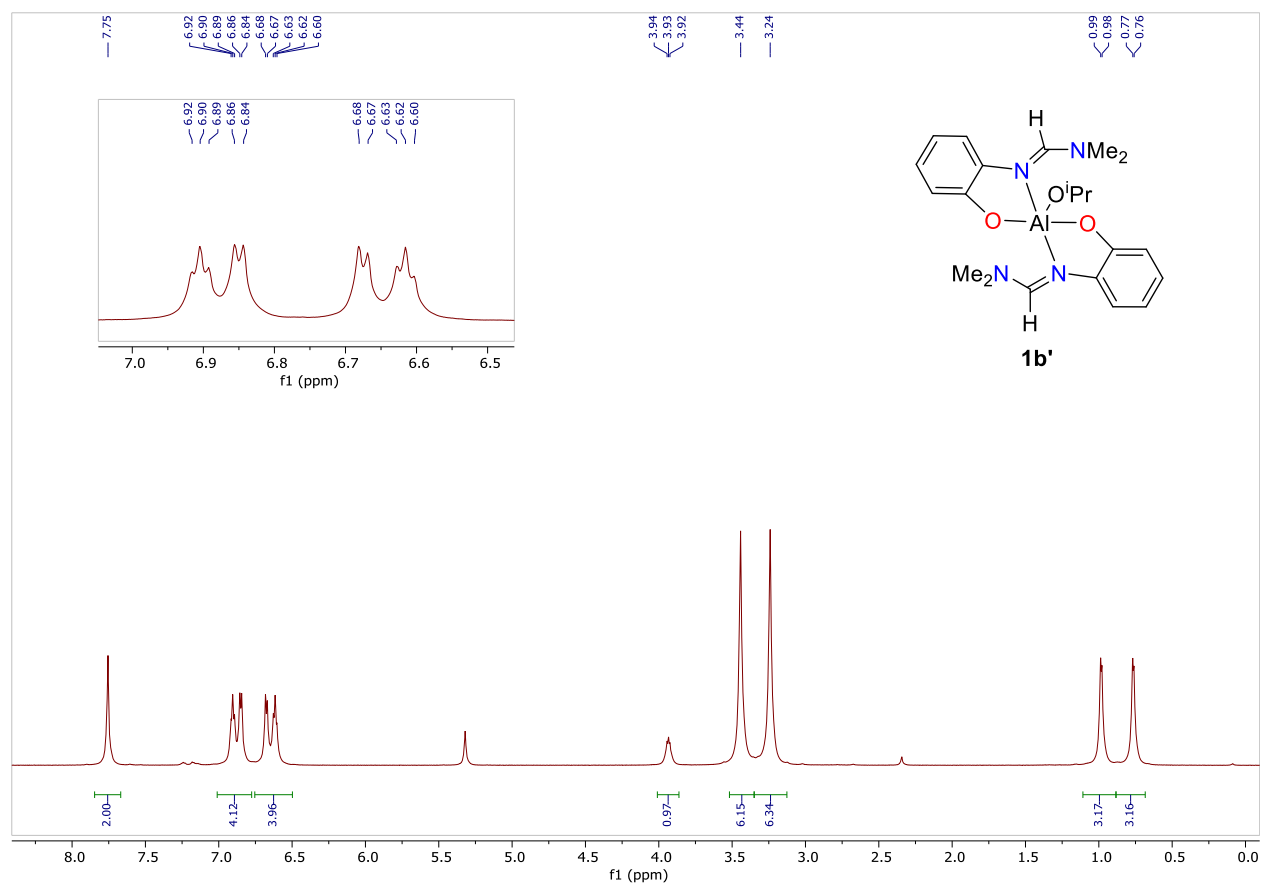

Figure S64  $^1\text{H}$  NMR (600 MHz,  $\text{CD}_2\text{Cl}_2$ , 298 K) of **1b'**.

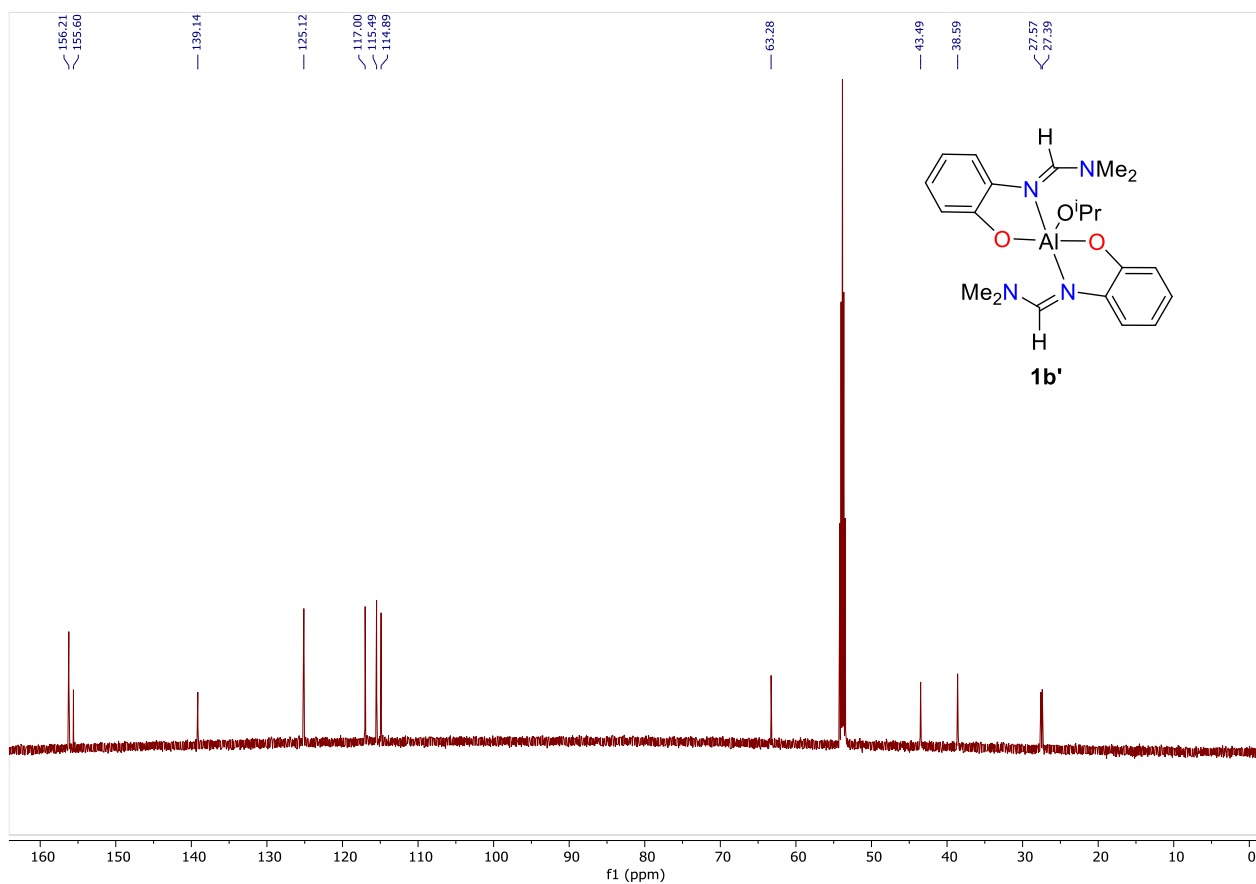

Figure S65  $\{^1\text{H}\}^{13}\text{C}$  NMR (151 MHz,  $\text{CD}_2\text{Cl}_2$ , 298 K) of **1b'**.

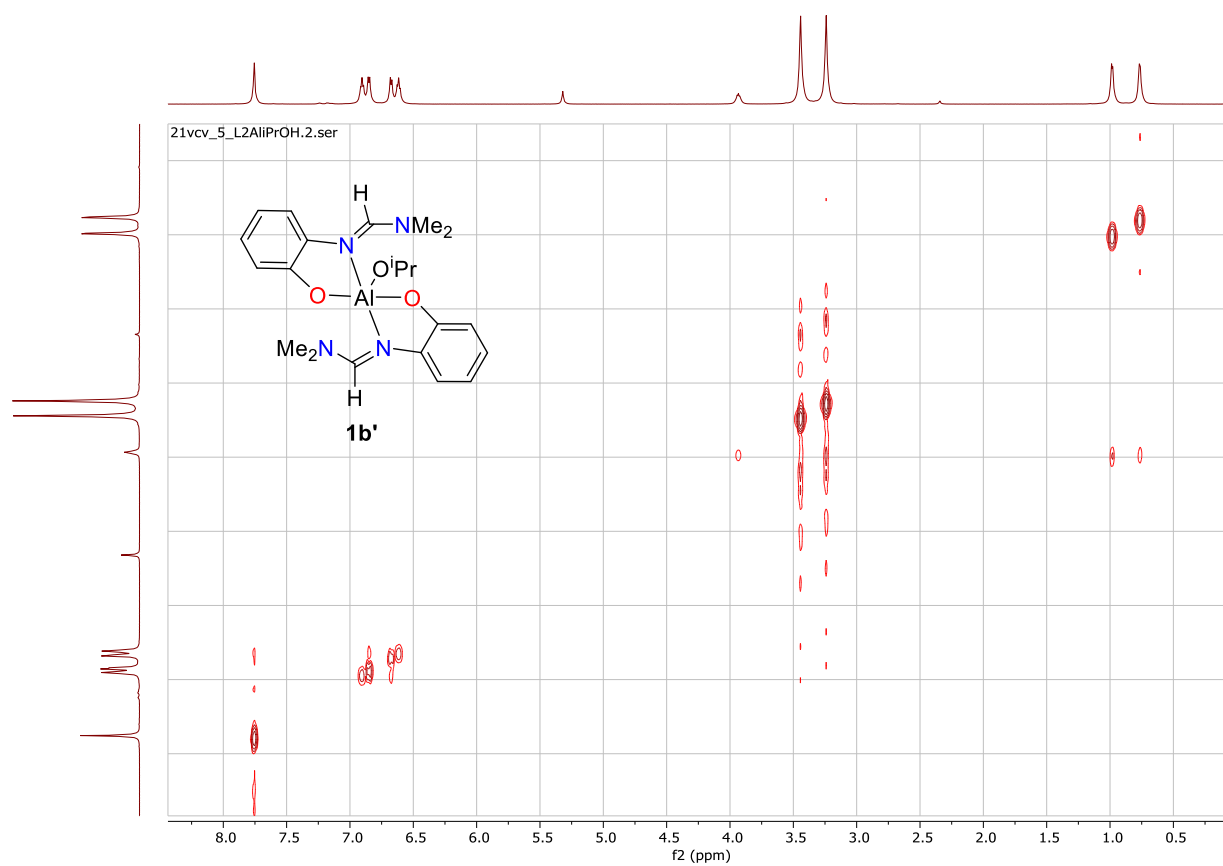

Figure S66  $^1\text{H}$   $^1\text{H}$  COSY (600 MHz,  $\text{CD}_2\text{Cl}_2$ , 298 K) of **1b'**.

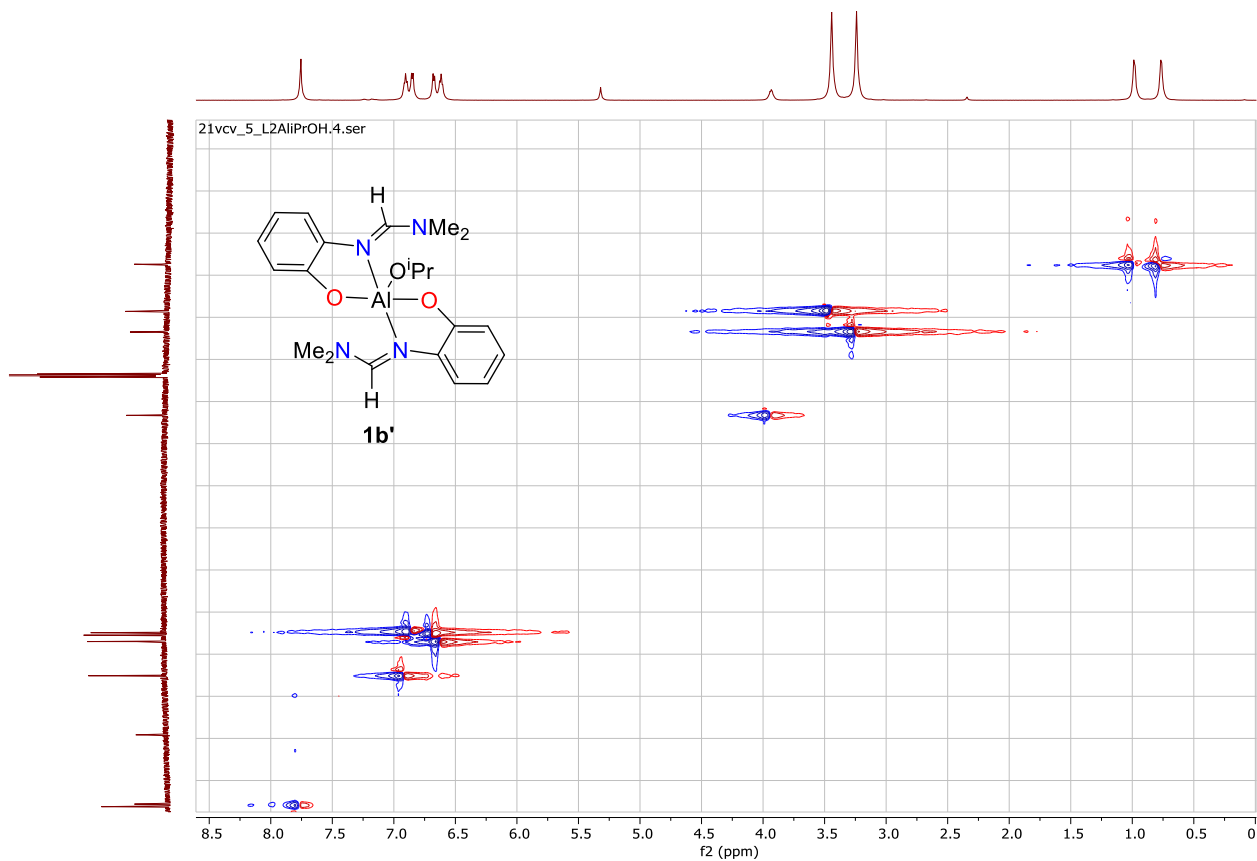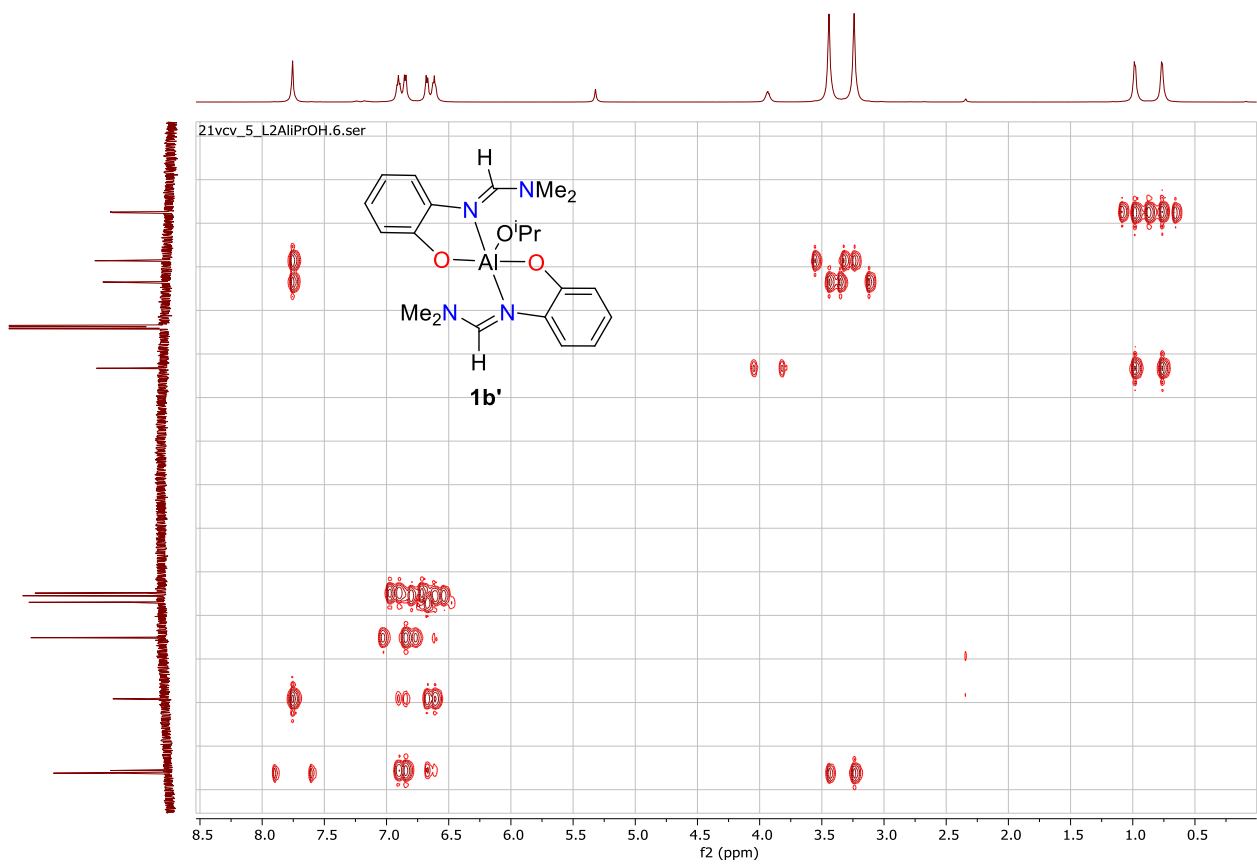

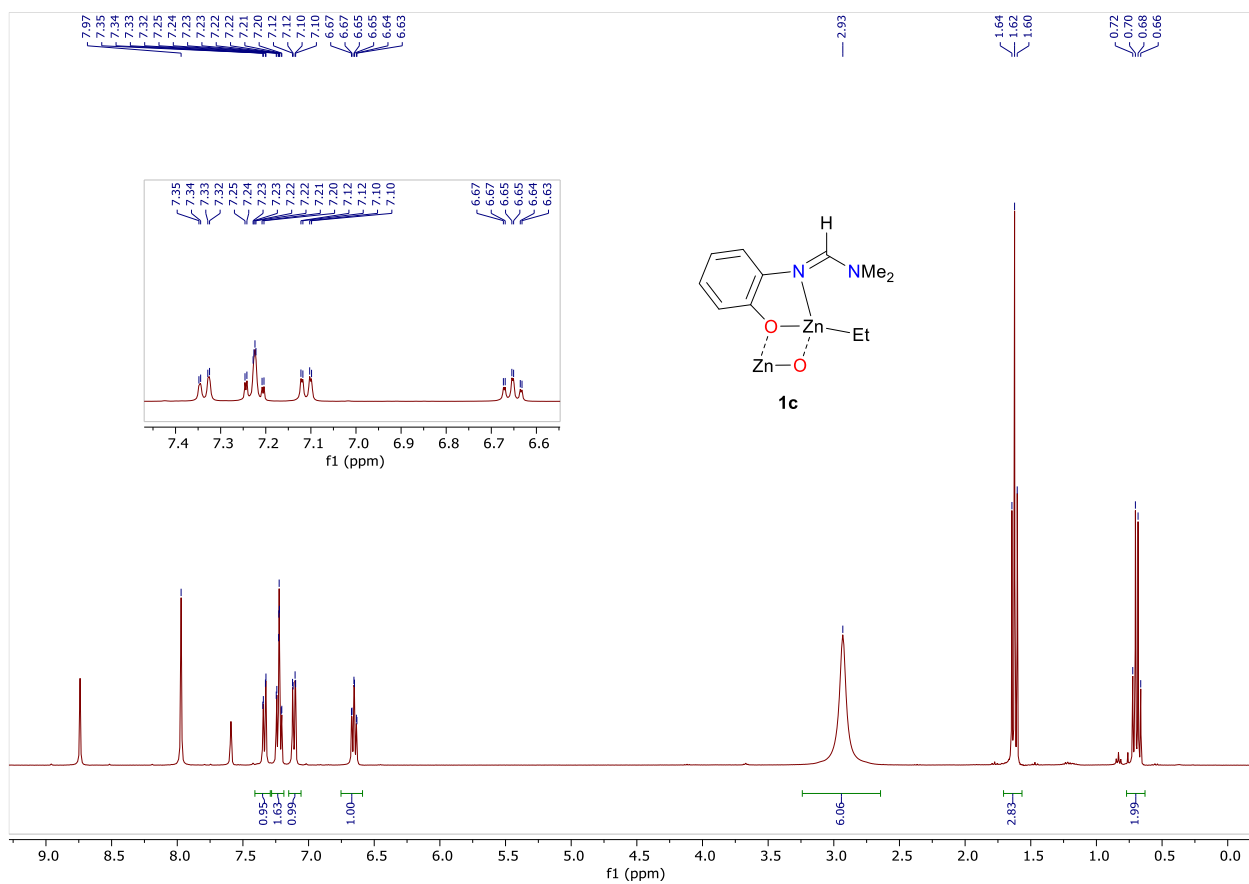

Figure S69  $^1\text{H}$  NMR (400 MHz,  $\text{C}_5\text{D}_5\text{N}$ , 298 K) of **1c**.

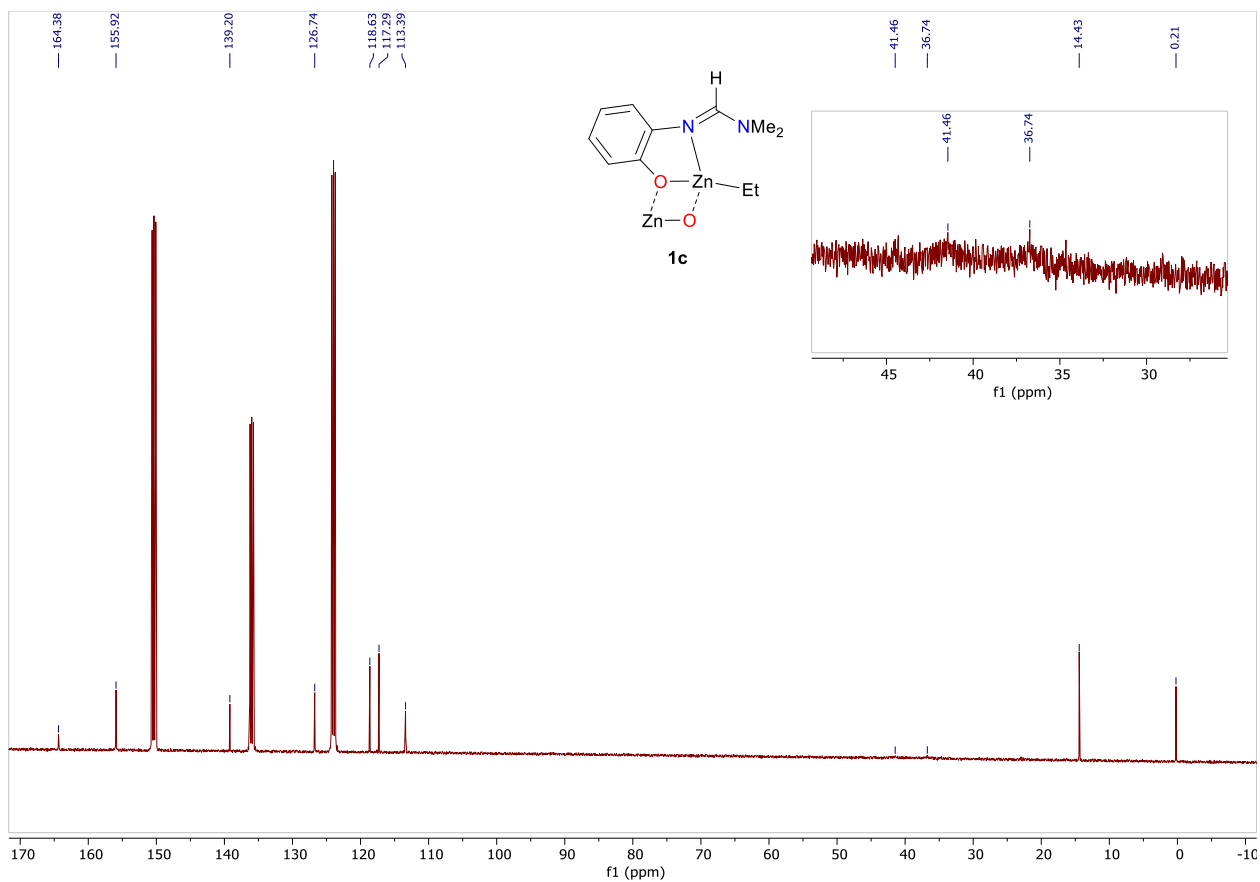

Figure S70  $\{^1\text{H}\}^{13}\text{C}$  NMR (101 MHz,  $\text{C}_5\text{D}_5\text{N}$ , 298 K) of **1c**.

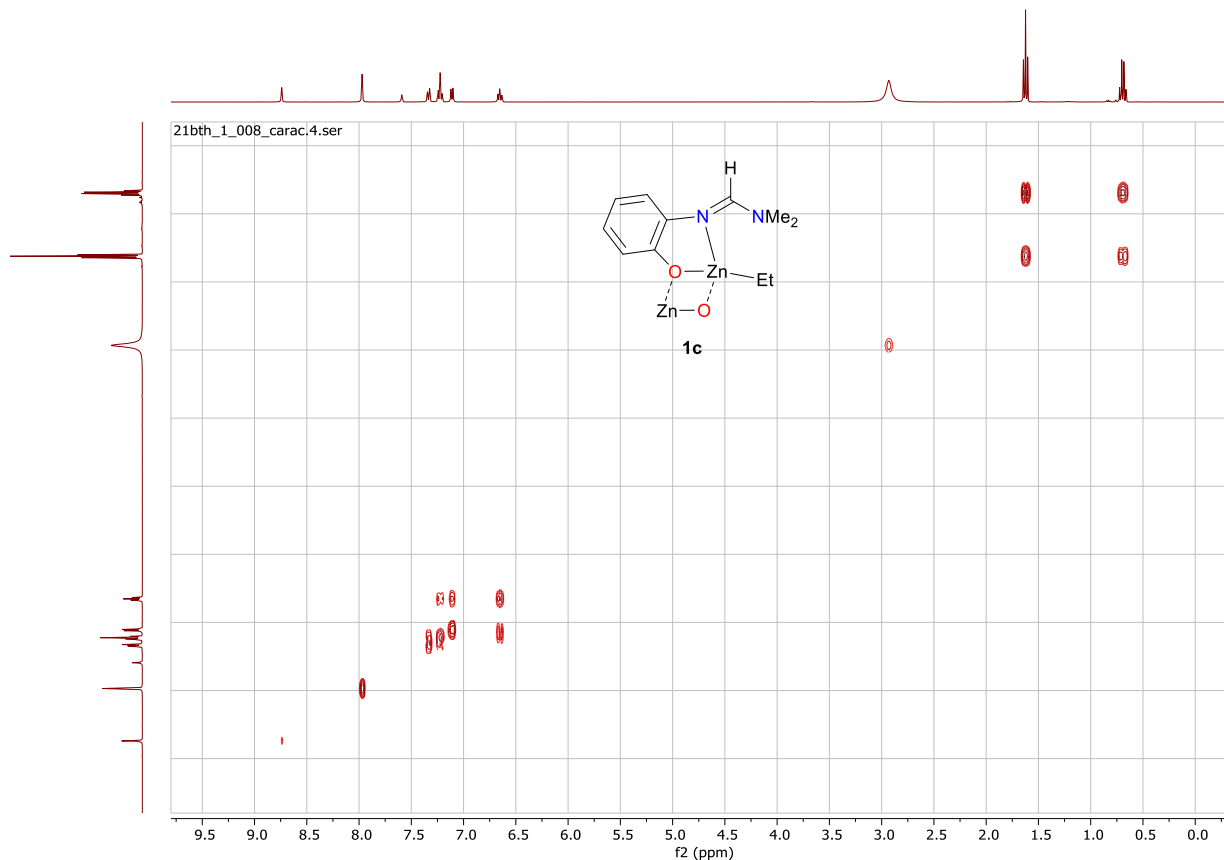

Figure S71  $^1\text{H}$   $^1\text{H}$  COSY (400 MHz,  $\text{C}_5\text{D}_5\text{N}$ ) of **1c**.

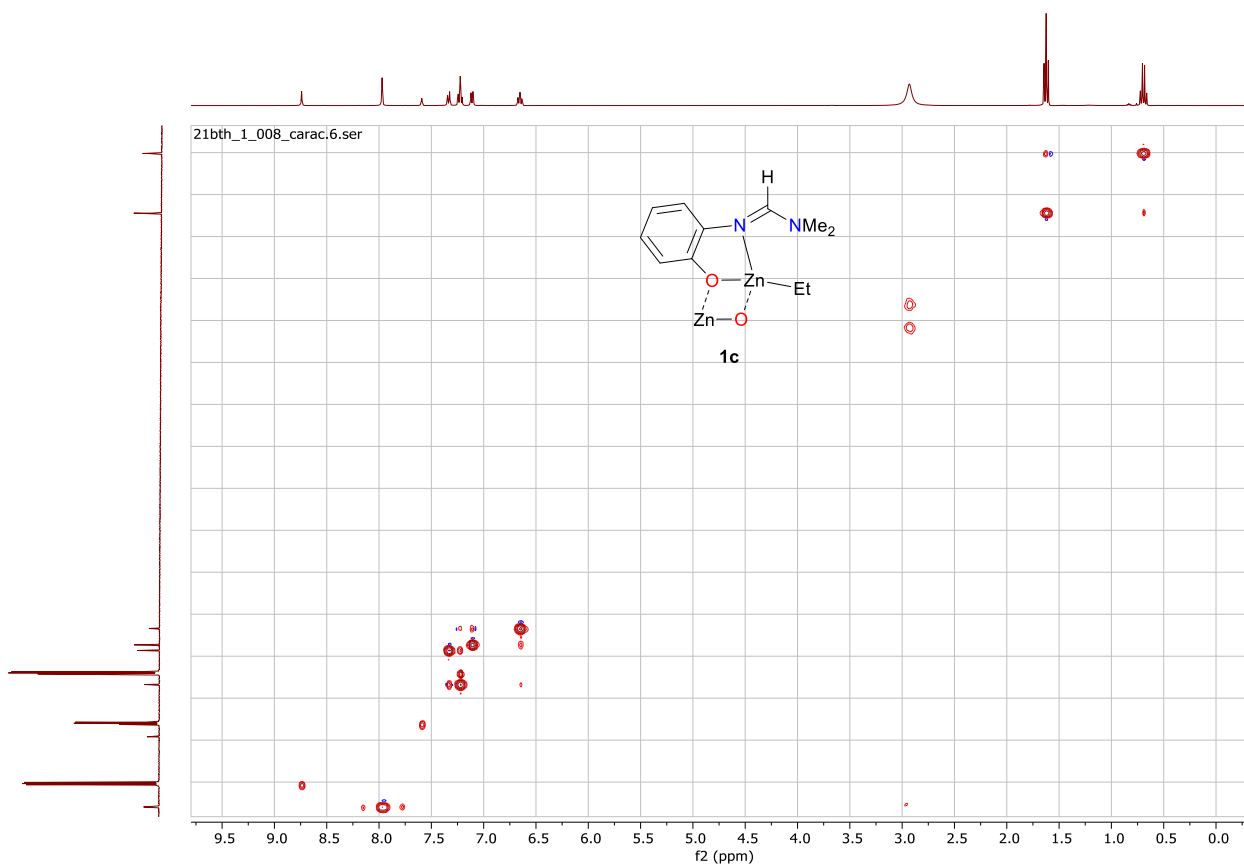

Figure S72  $^1\text{H}$   $^{13}\text{C}$  HSQC (400 MHz / 101 MHz,  $\text{C}_5\text{D}_5\text{N}$ , 298 K) of **1c**.

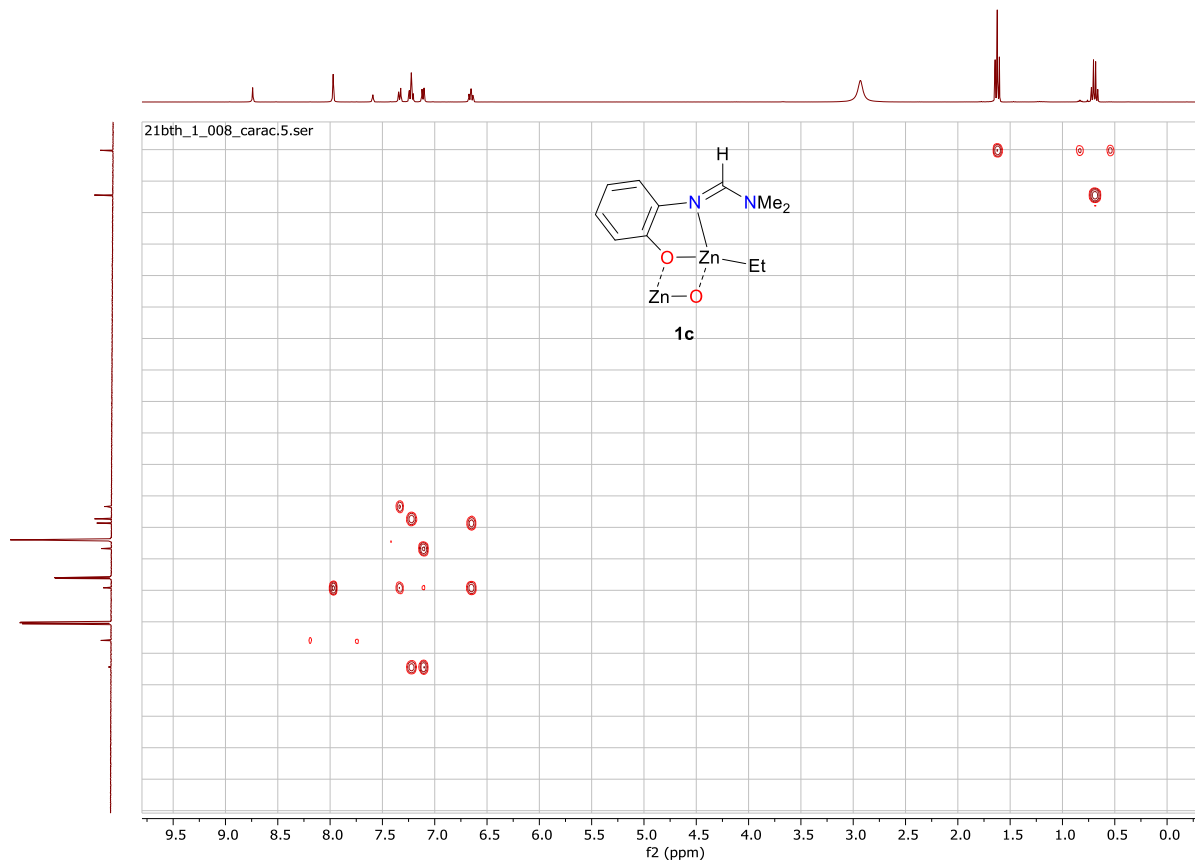

Figure S73  $^1\text{H}$   $^{13}\text{C}$  HMBC (400 MHz / 101 MHz,  $\text{C}_5\text{D}_5\text{N}$ , 298 K) of **1c**.

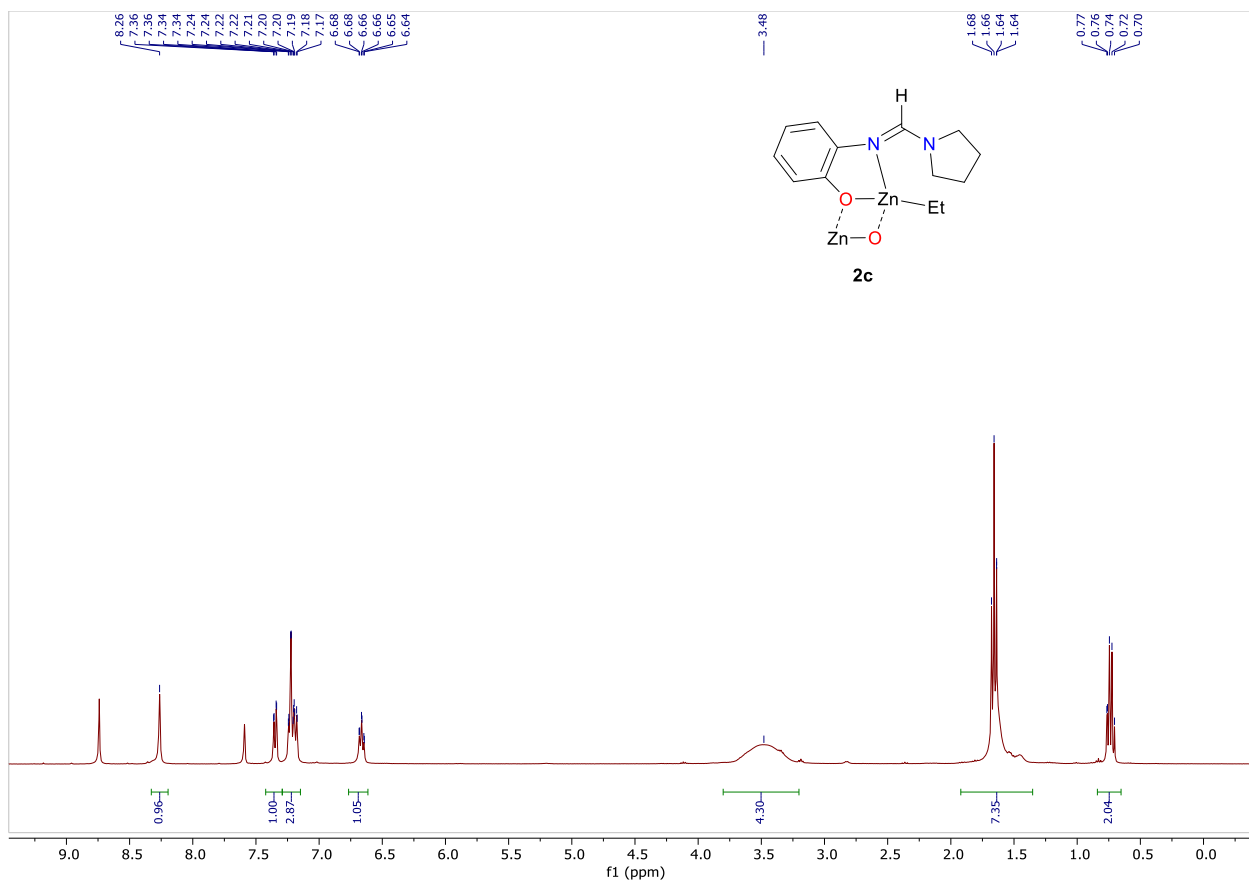

Figure S74  $^1\text{H}$  NMR (400 MHz,  $\text{C}_5\text{D}_5\text{N}$ , 298 K) of **2c**.

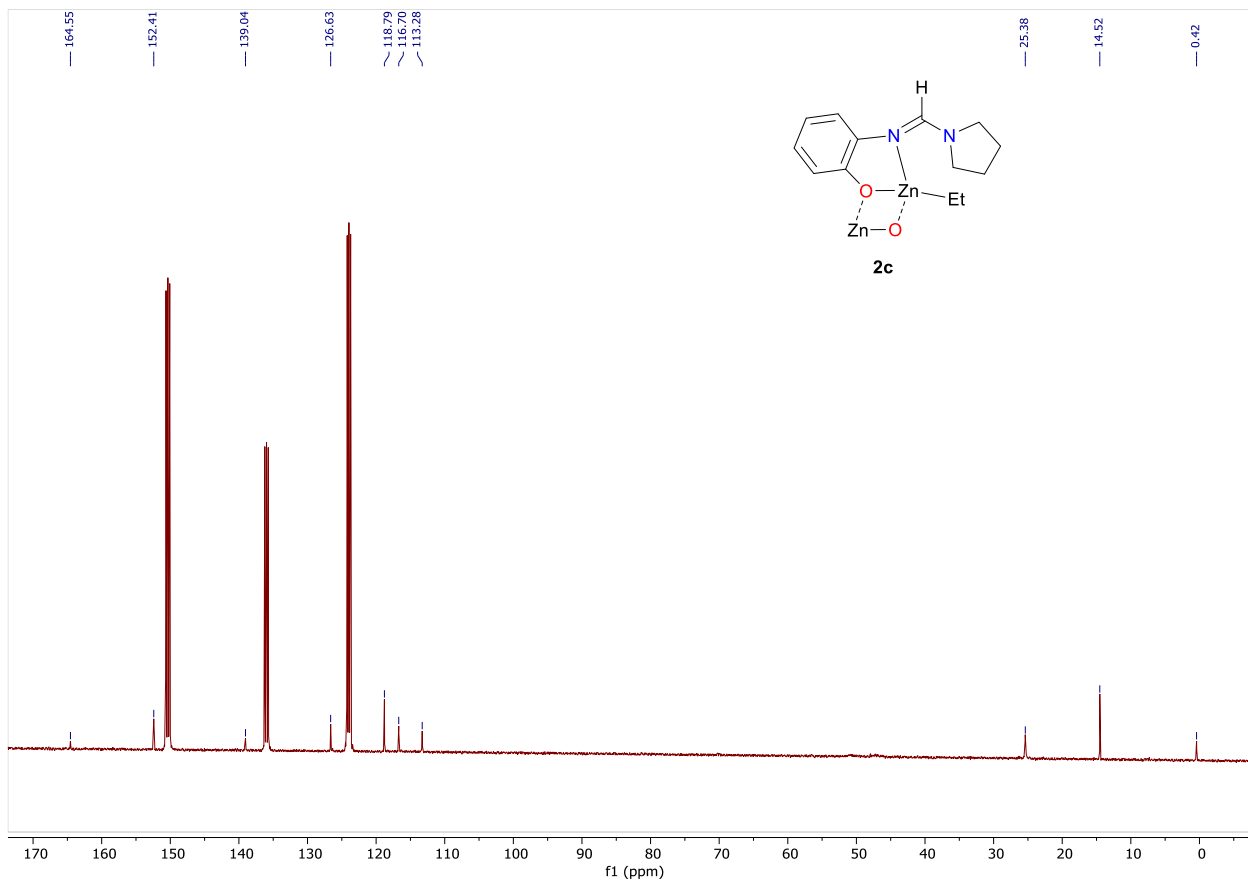

Figure S75  $\{^1\text{H}\}^{13}\text{C}$  NMR (101 MHz,  $\text{C}_5\text{D}_5\text{N}$ , 298 K) of **2c**.

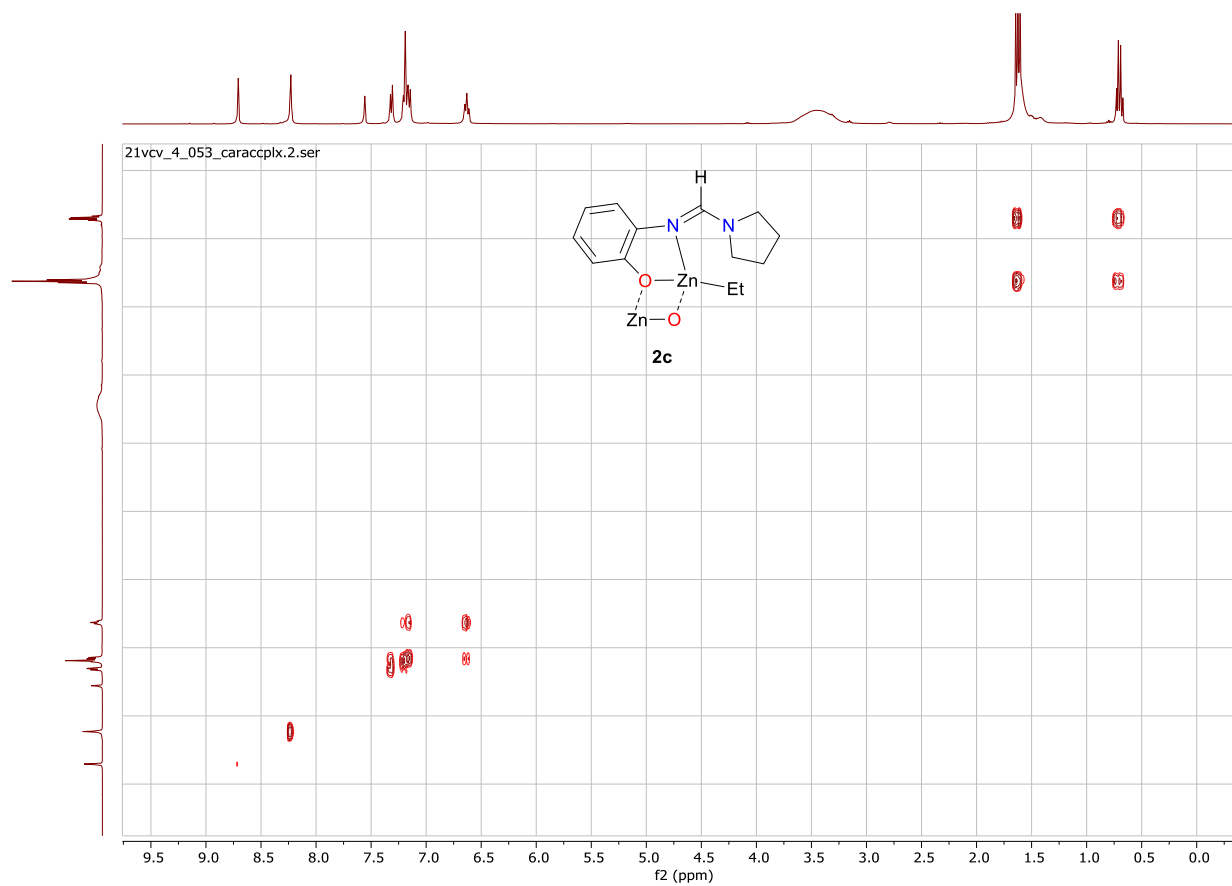

Figure S76  $^1\text{H}$   $^1\text{H}$  COSY (400 MHz,  $\text{C}_5\text{D}_5\text{N}$ ) of **2c**.

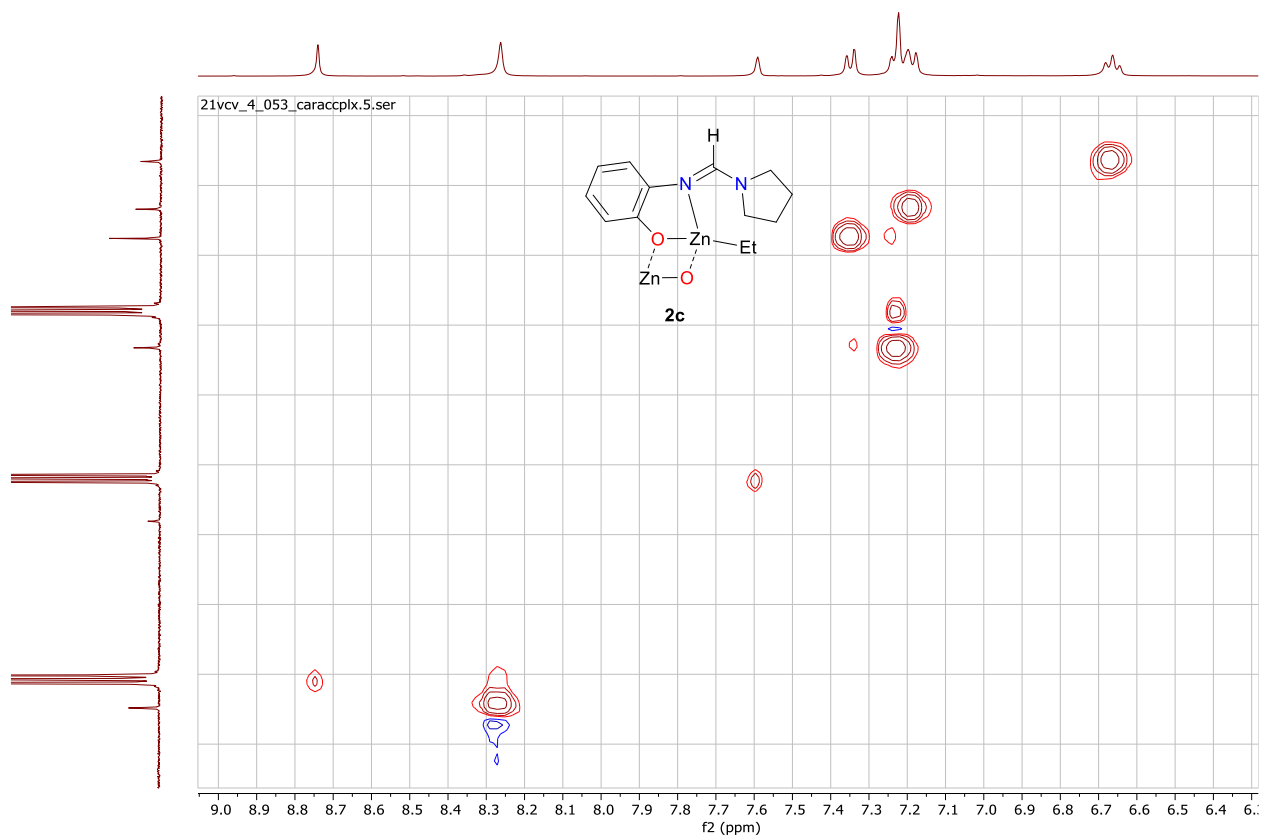

Figure S77  $^1\text{H}$   $^{13}\text{C}$  HSQC (400 MHz / 101 MHz,  $\text{C}_5\text{D}_5\text{N}$ , 298 K) of **2c**.

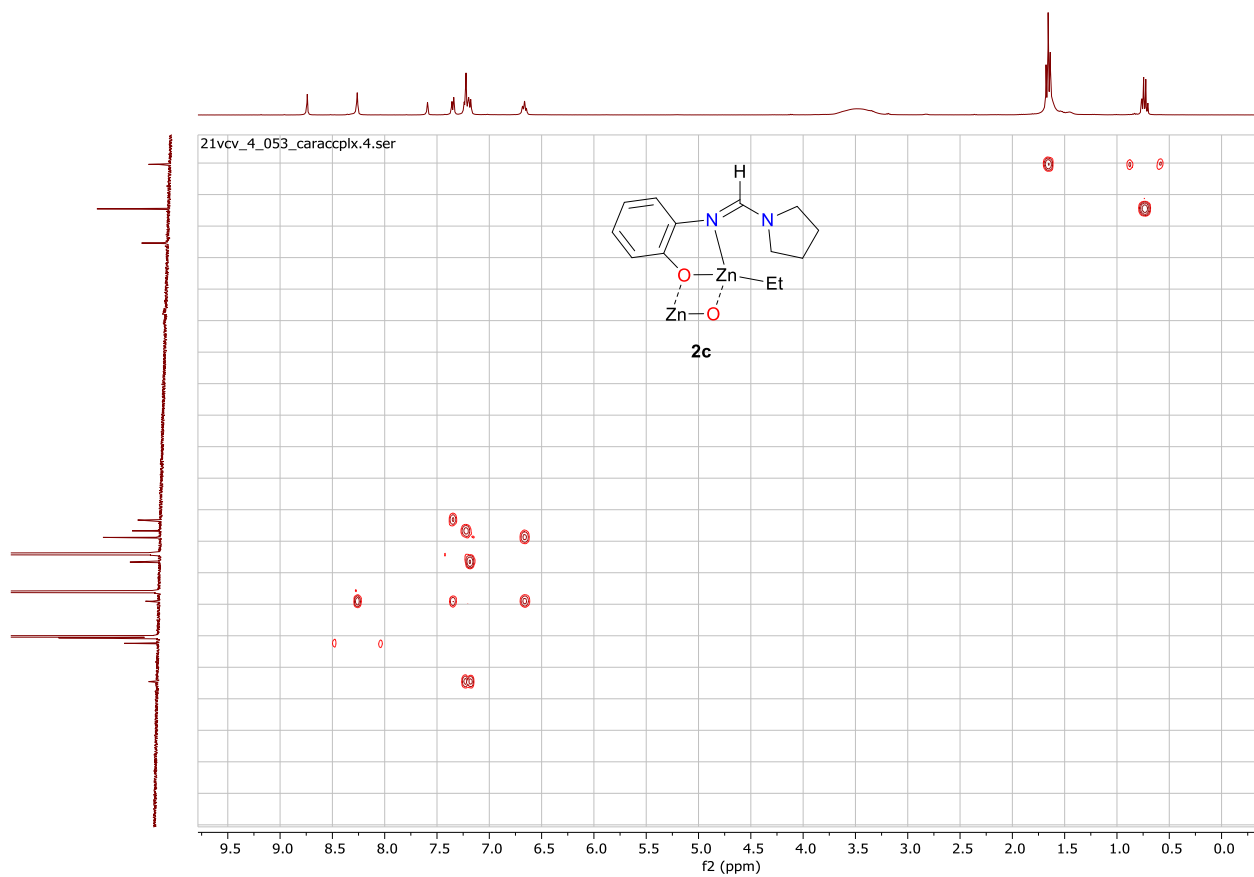

Figure S78  $^1\text{H}$   $^{13}\text{C}$  HMBC (400 MHz / 101 MHz,  $\text{C}_5\text{D}_5\text{N}$ , 298 K) of **2c**.



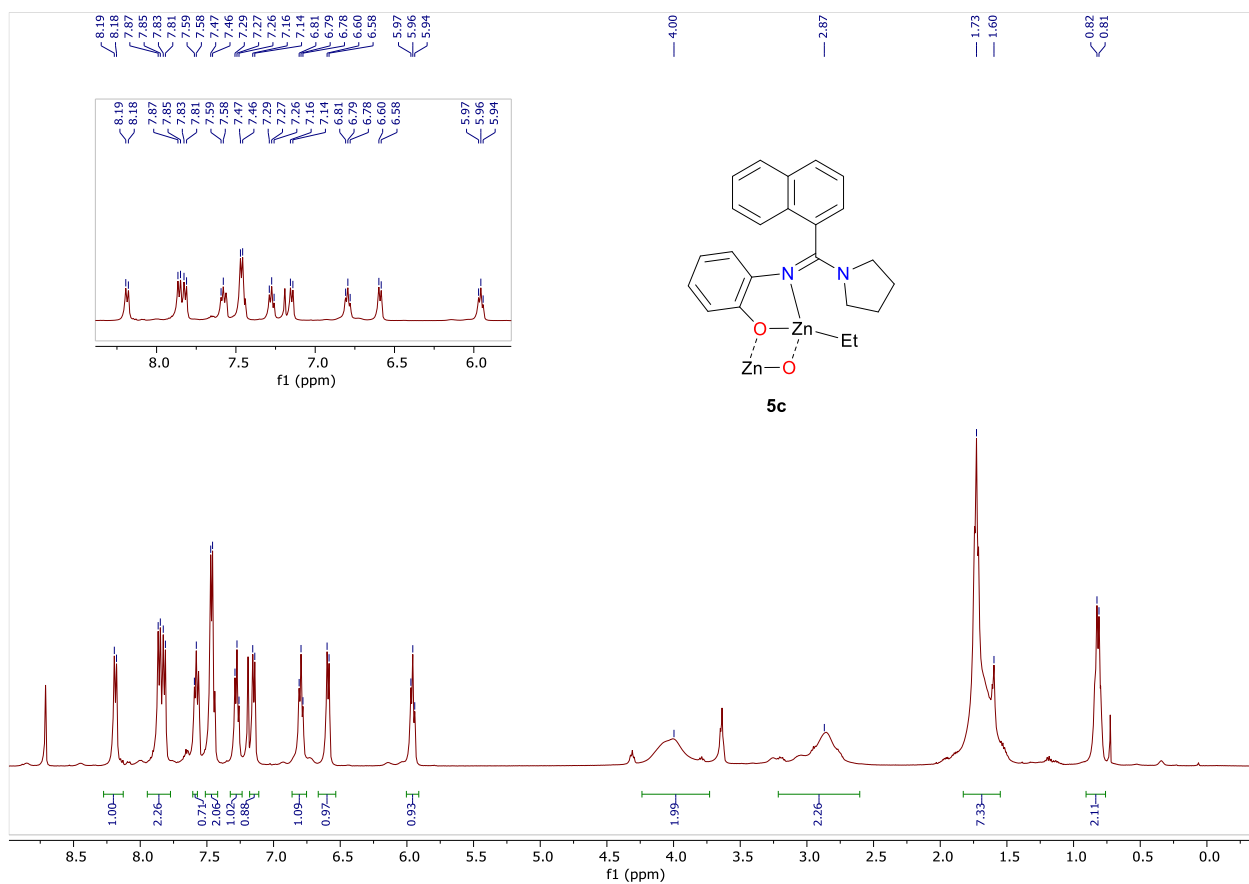

Figure S79 <sup>1</sup>H NMR (500 MHz, C<sub>5</sub>D<sub>5</sub>N, 298 K) of 5c.

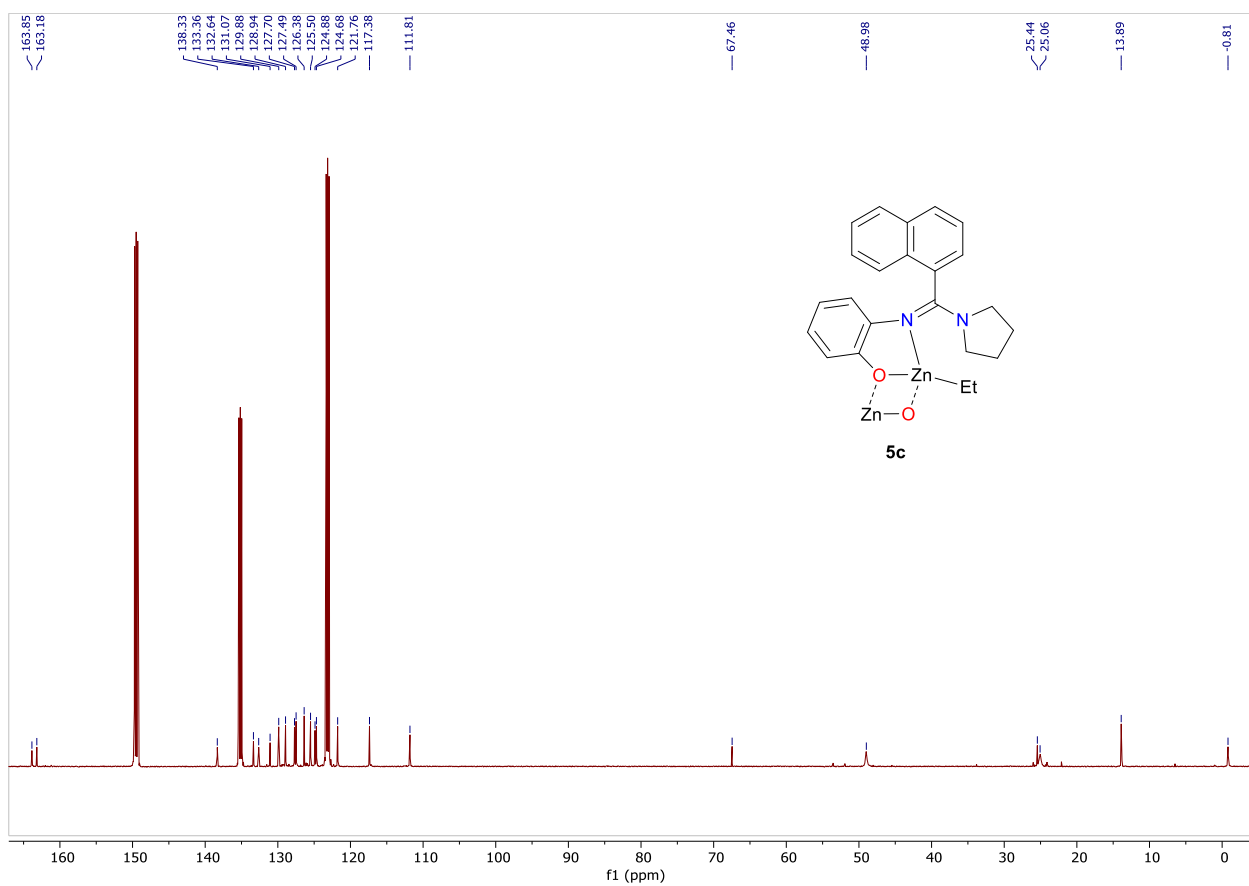

Figure S80 <sup>1</sup>H<sup>13</sup>C NMR (125 MHz, C<sub>5</sub>D<sub>5</sub>N, 298 K) of 5c.

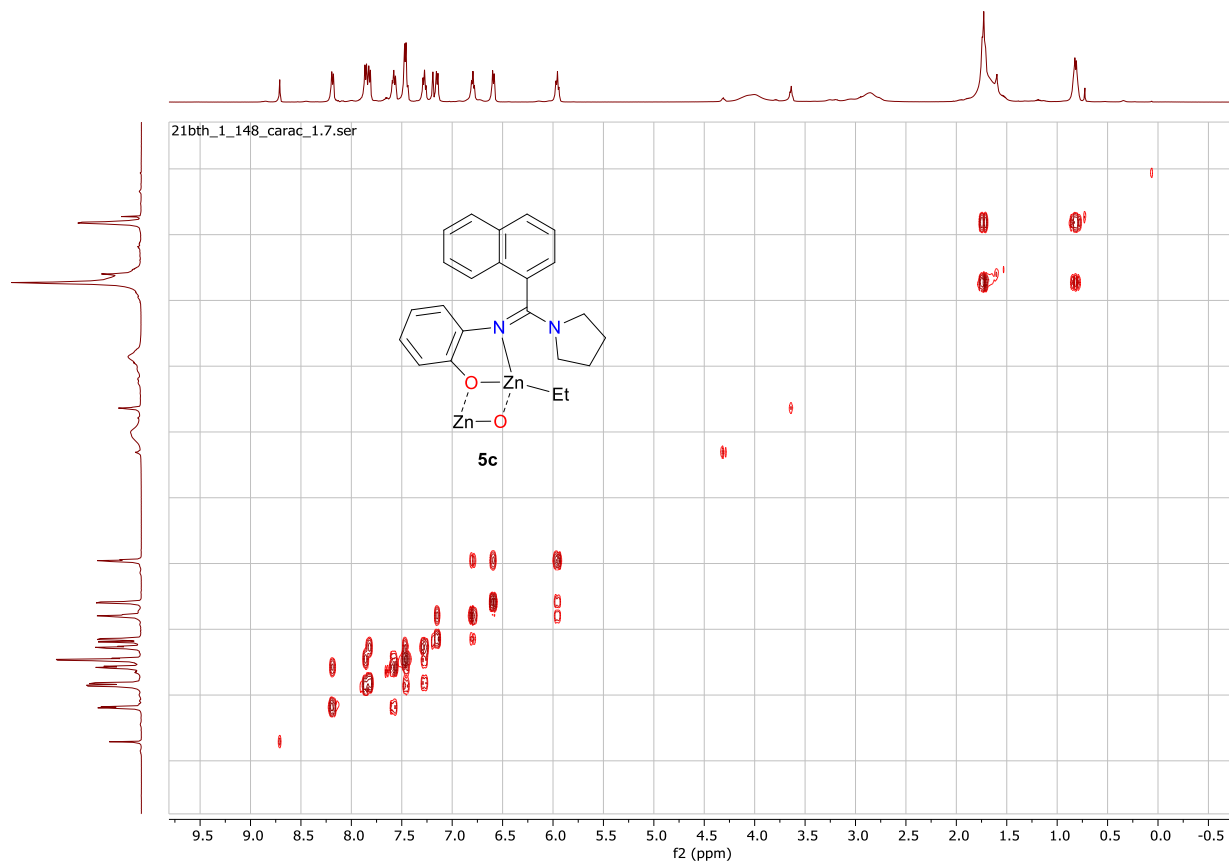

Figure S81  $^1\text{H}$   $^1\text{H}$  COSY (500 MHz,  $\text{C}_5\text{D}_5\text{N}$ , 298 K) of **5c**.

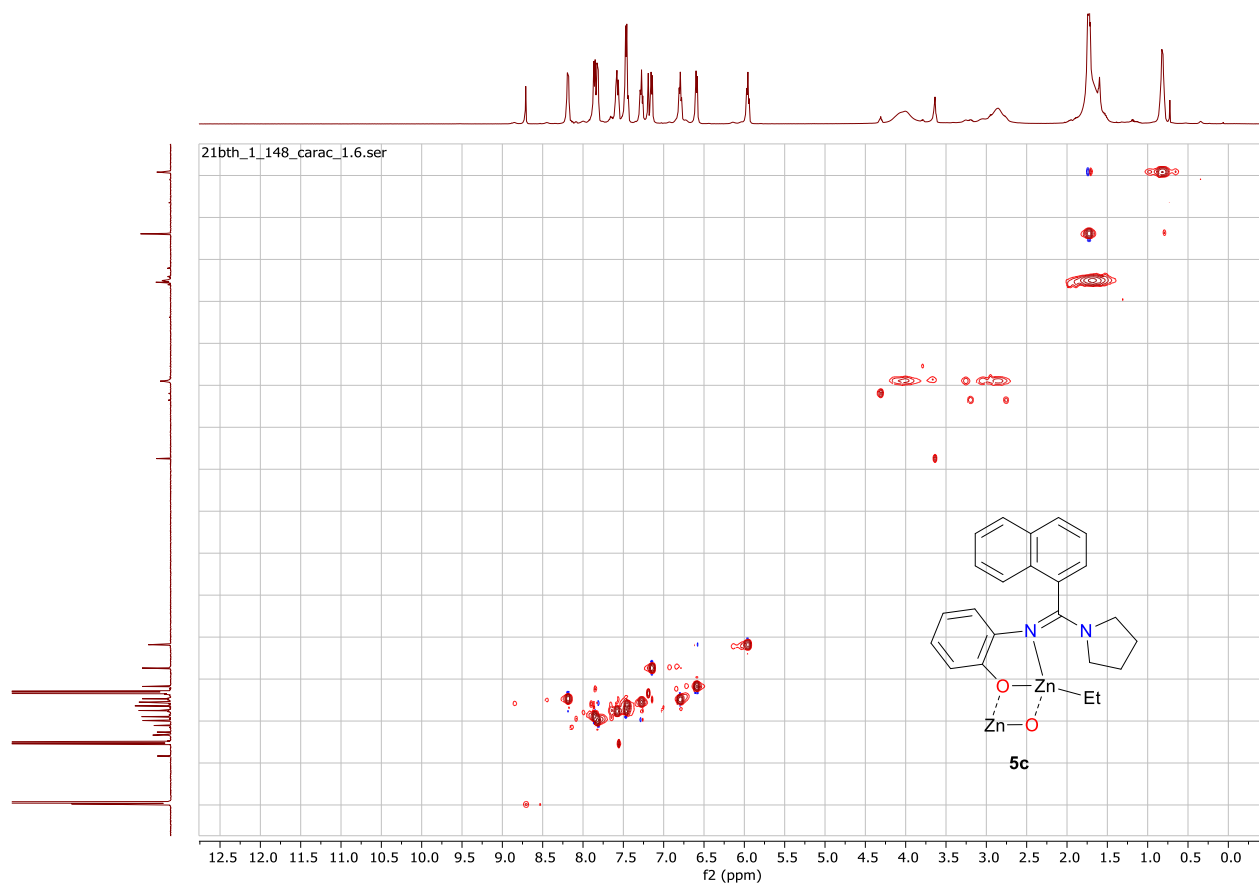

Figure S82  $^1\text{H}$   $^{13}\text{C}$  HSQC (500 MHz / 125 MHz,  $\text{C}_5\text{D}_5\text{N}$ , 298 K) of **5c**.

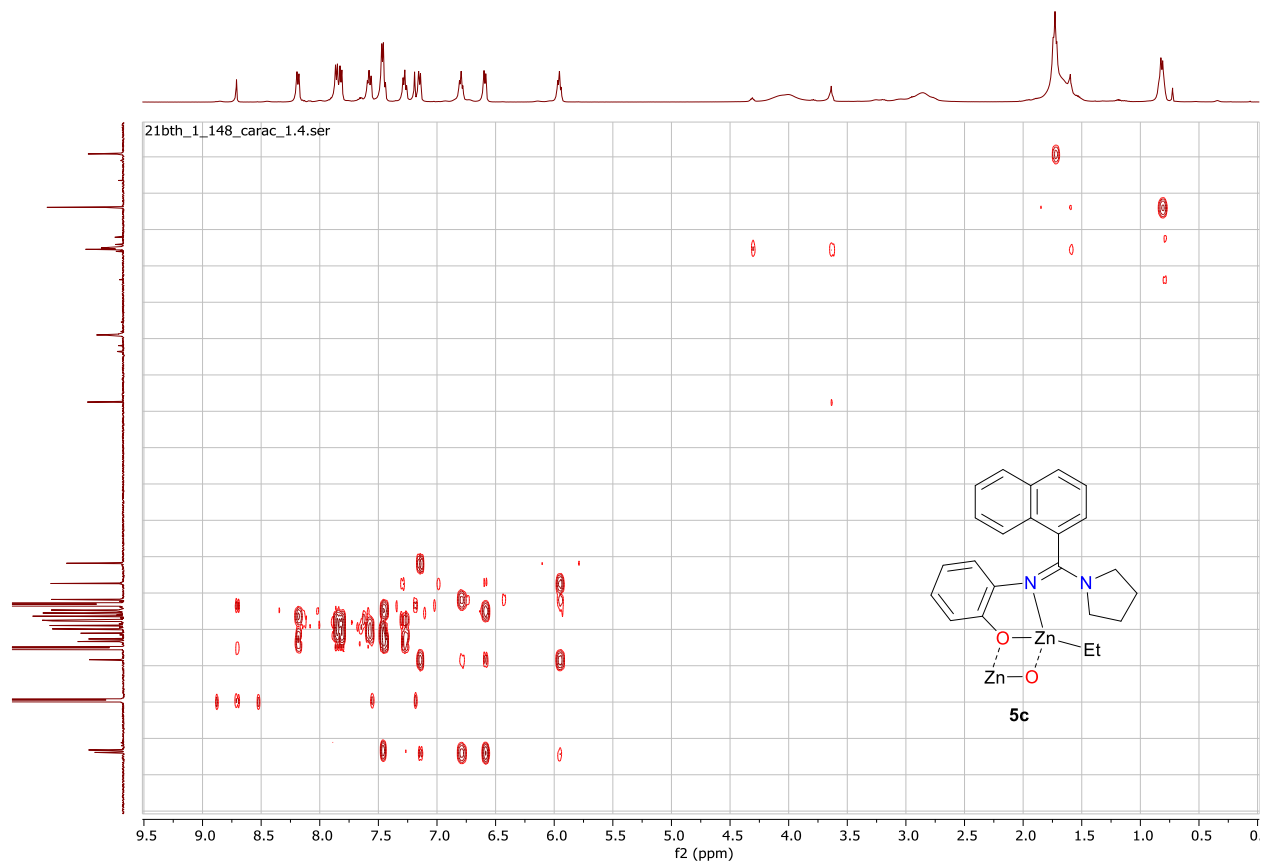

Figure S83  $^1\text{H}$   $^{13}\text{C}$  HMBC (500 MHz / 125 MHz,  $\text{C}_5\text{D}_5\text{N}$ , 298 K) of **5c**.

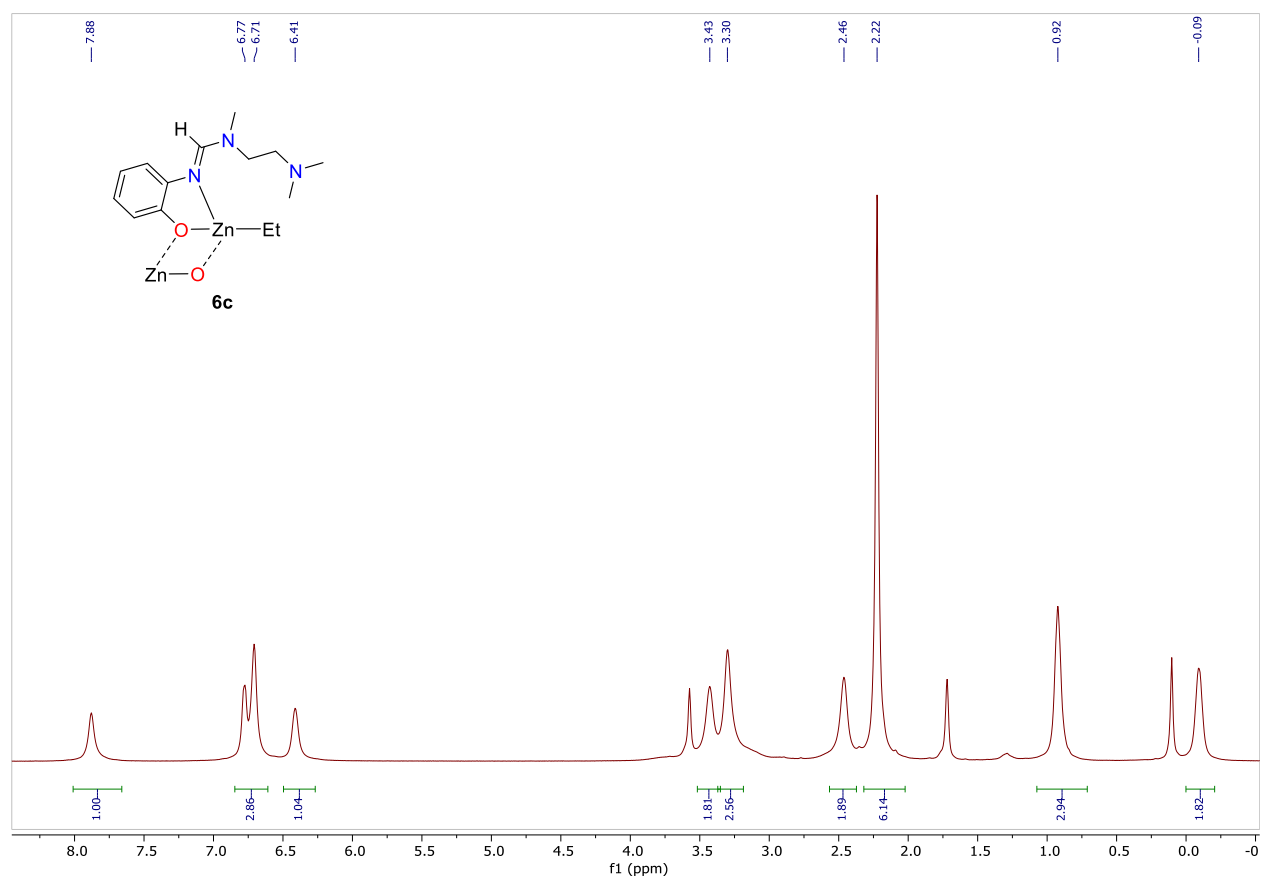

Figure S84  $^1\text{H}$  (500 MHz,  $\text{THF-d}_8$ , 298 K) of **6c**.

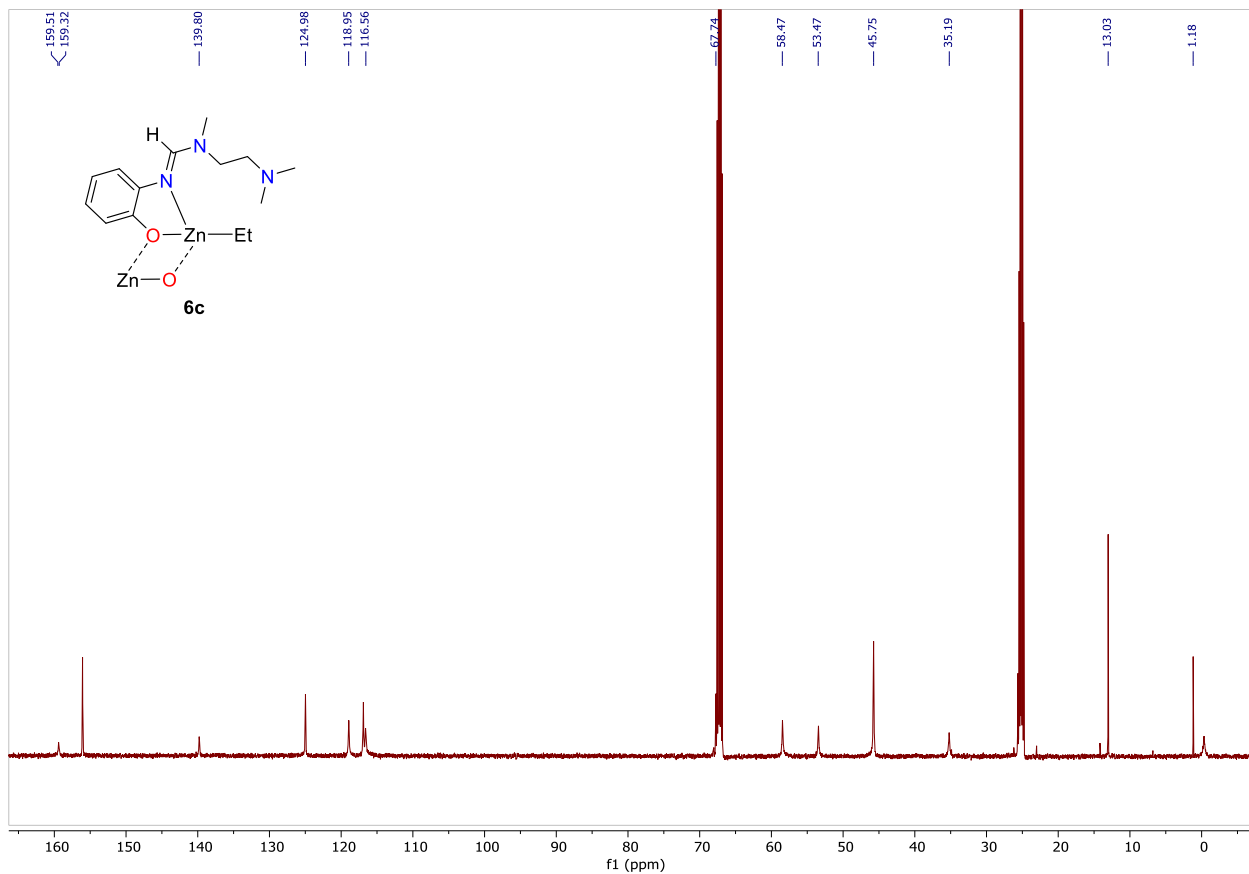

Figure S85  $^{13}\text{C}$  (125 MHz, THF- $d_8$ , 298 K) of **6c**.

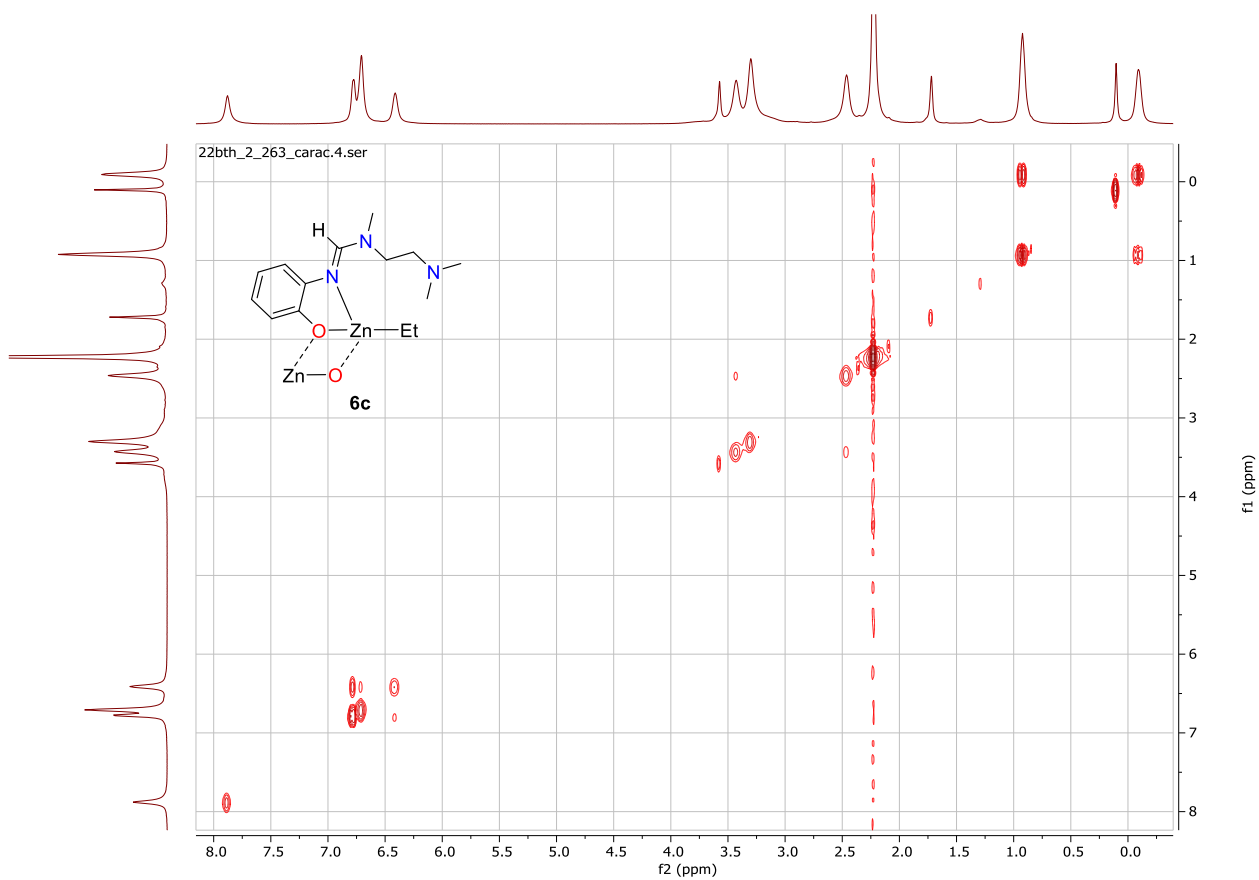

Figure S86  $^1\text{H}$   $^1\text{H}$  HMBC (500 MHz / 500 MHz, THF- $d_8$ , 298 K) of **6c**.

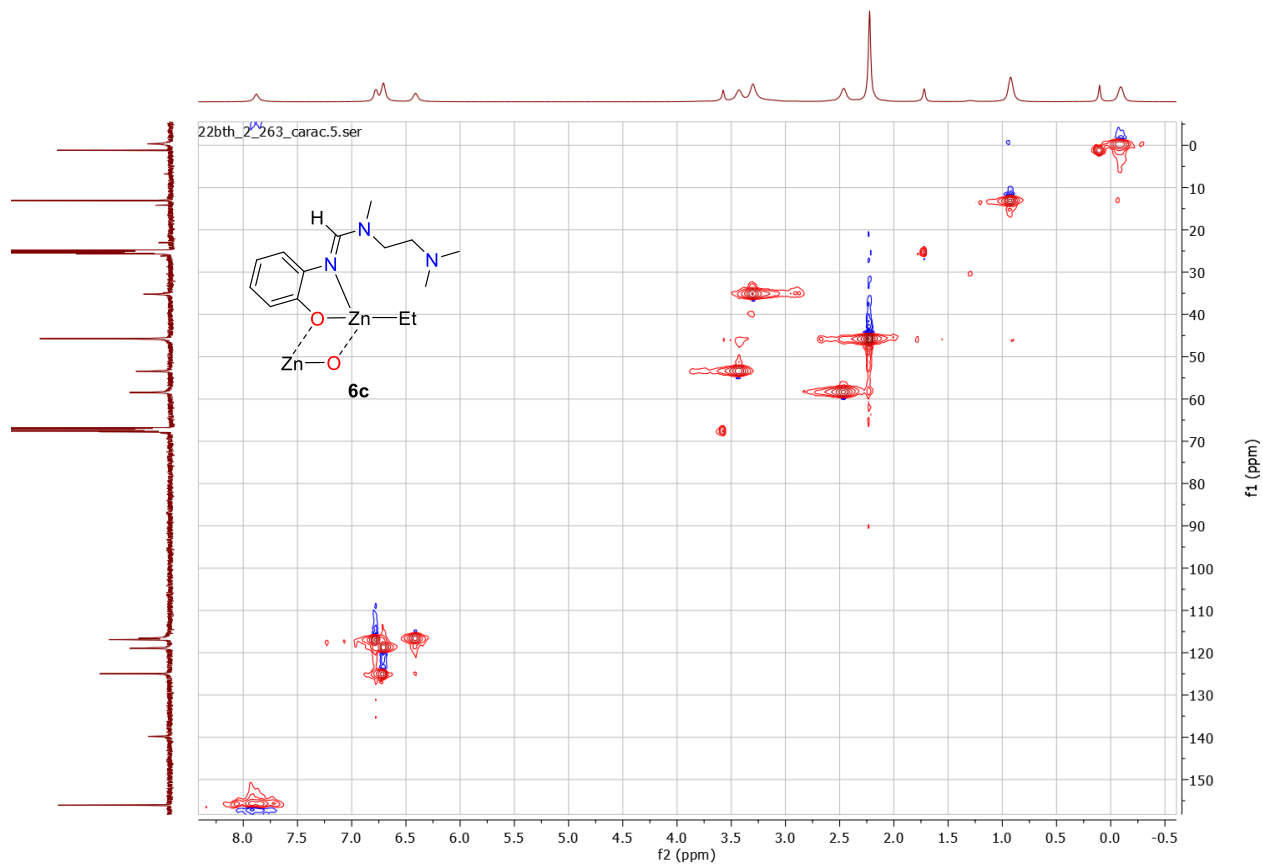

Figure S87  $^1\text{H}$   $^{13}\text{C}$  HSQC (500 MHz / 125 MHz, THF- $d_8$ , 298 K) of **6c**.

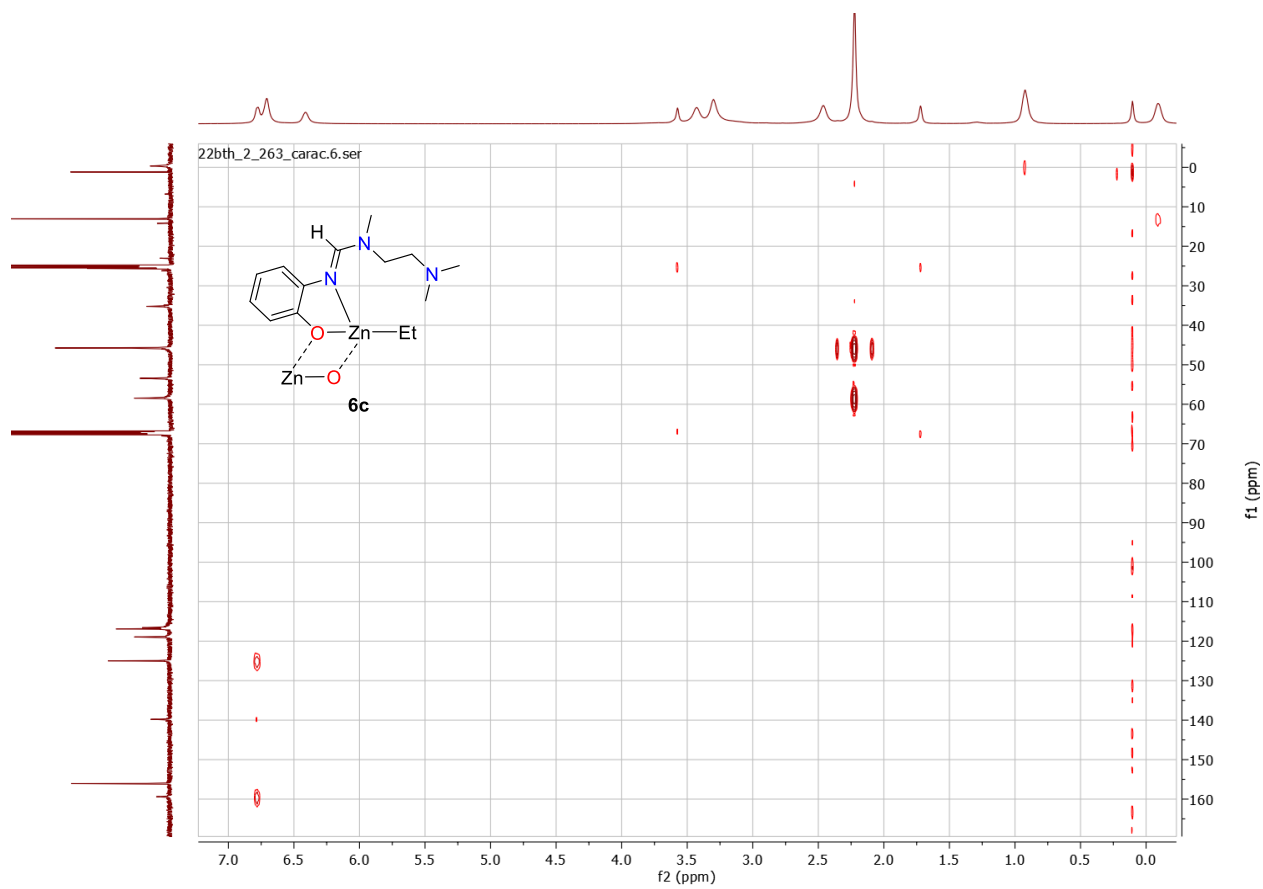

Figure S88  $^1\text{H}$   $^{13}\text{C}$  HMBC (500 MHz / 125 MHz, THF- $d_8$ , 298 K) of **6c**.

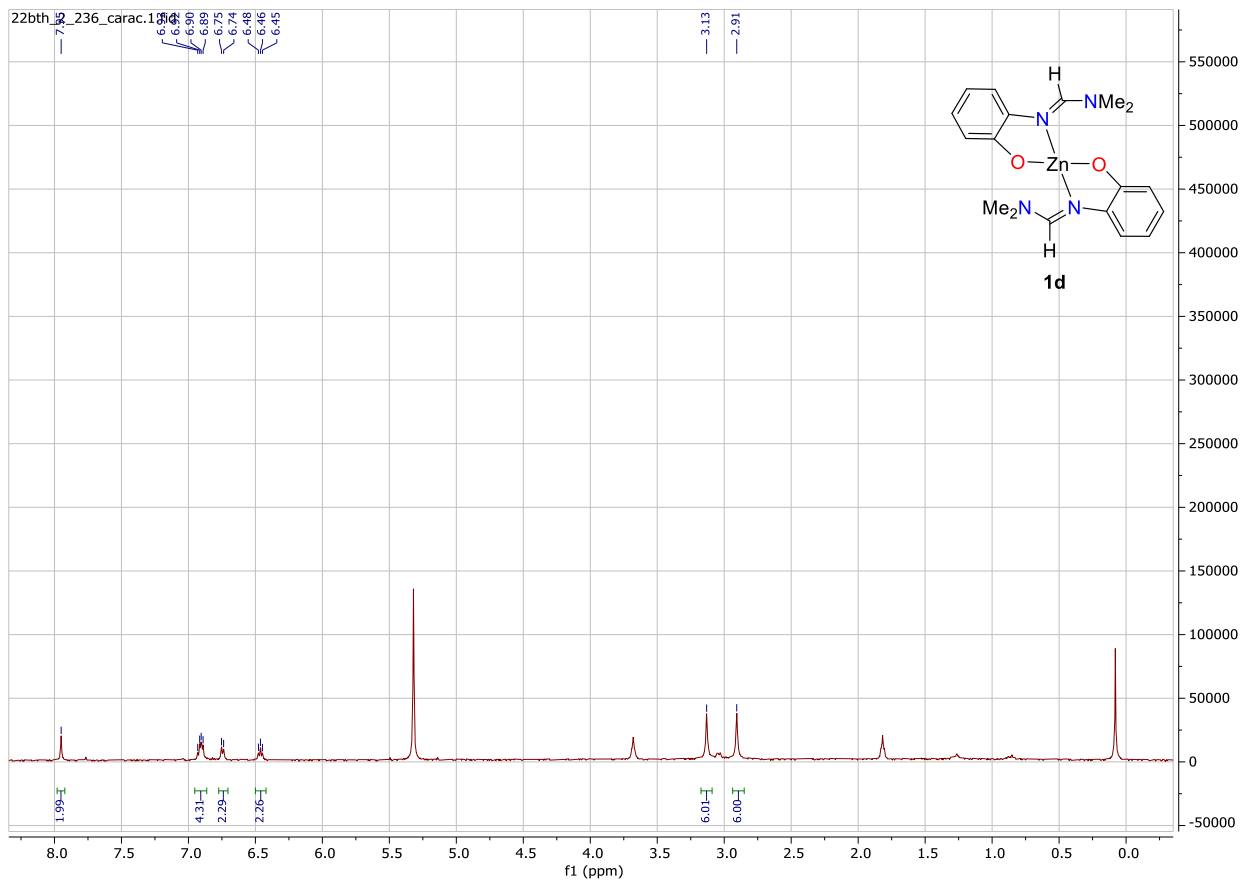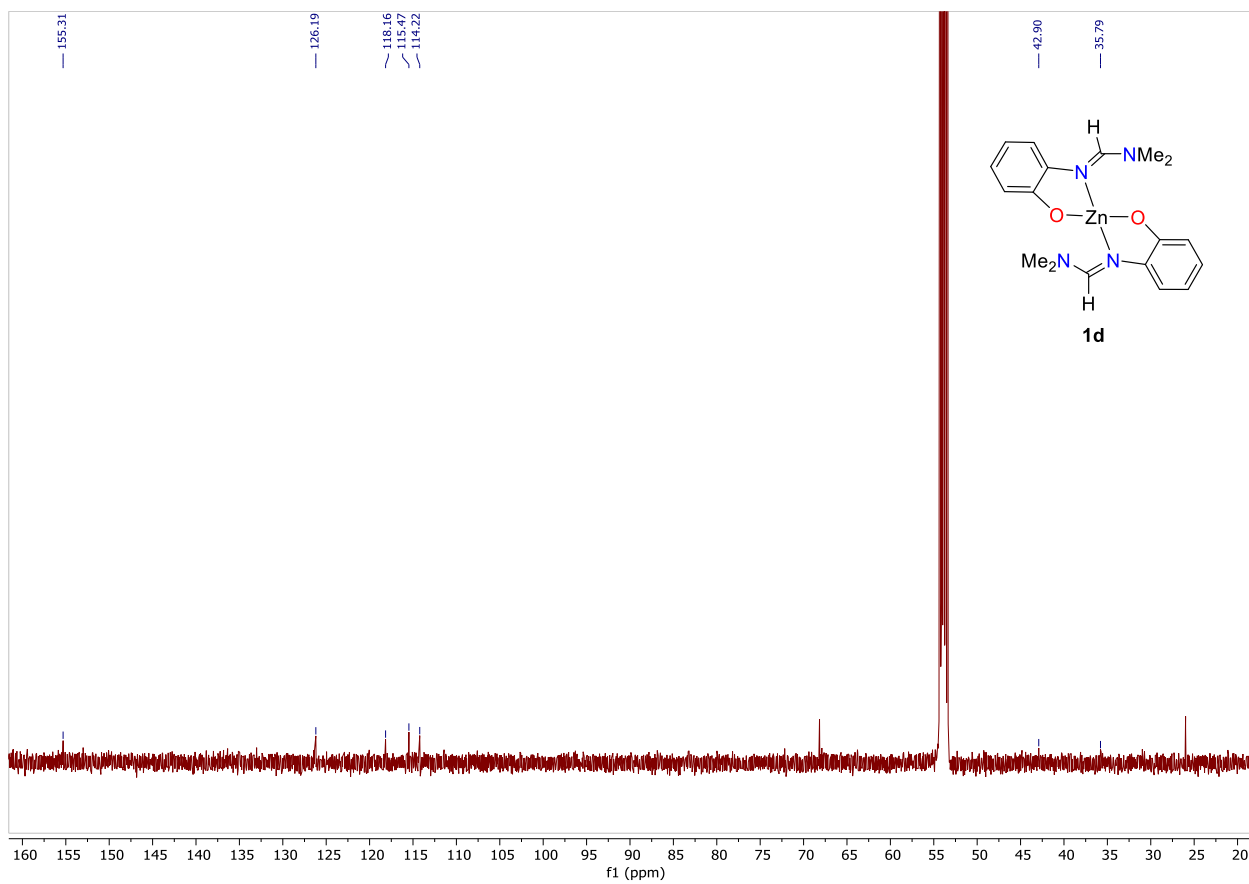

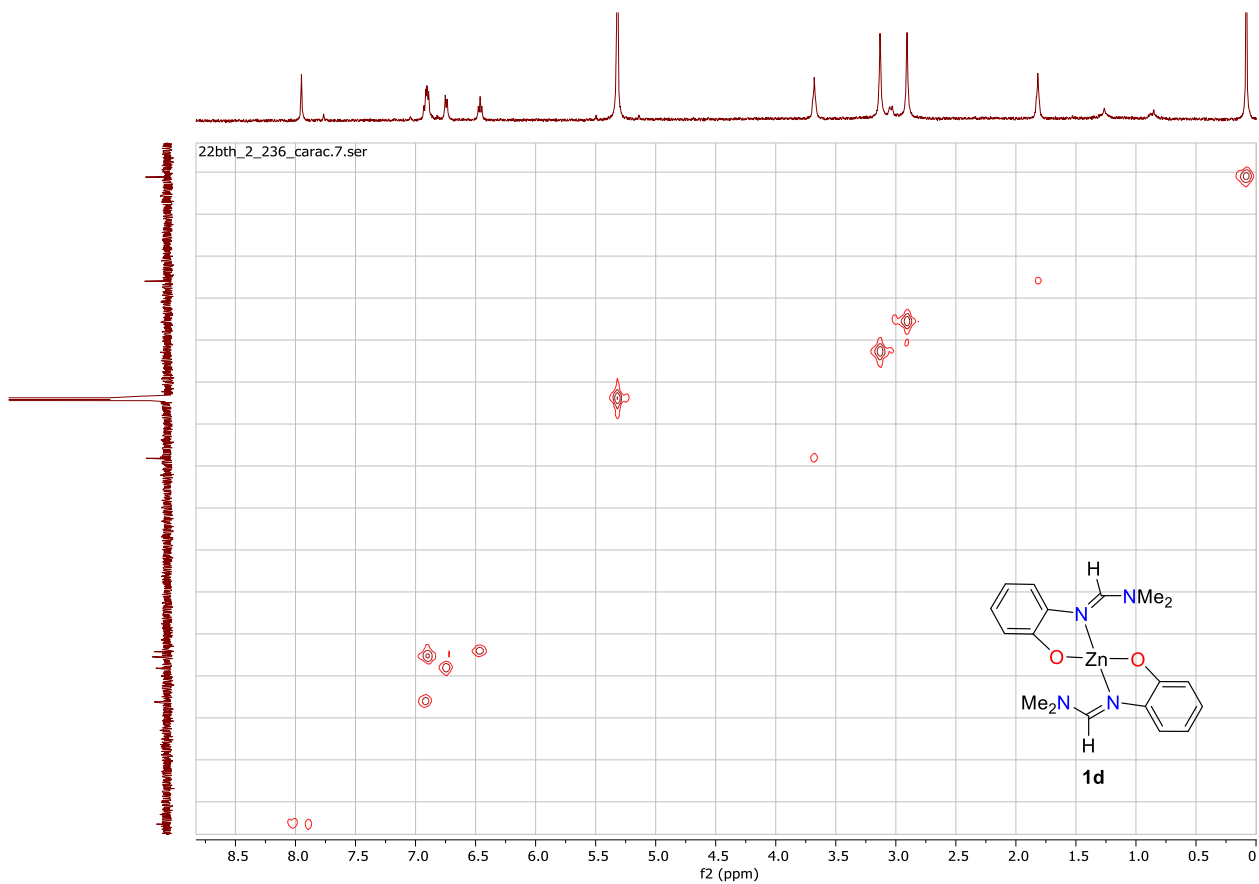

Figure S91  $^1\text{H}$   $^{13}\text{C}$  HSQC (500 MHz / 125 MHz,  $\text{CD}_2\text{Cl}_2$ , 298 K) of **1d**.

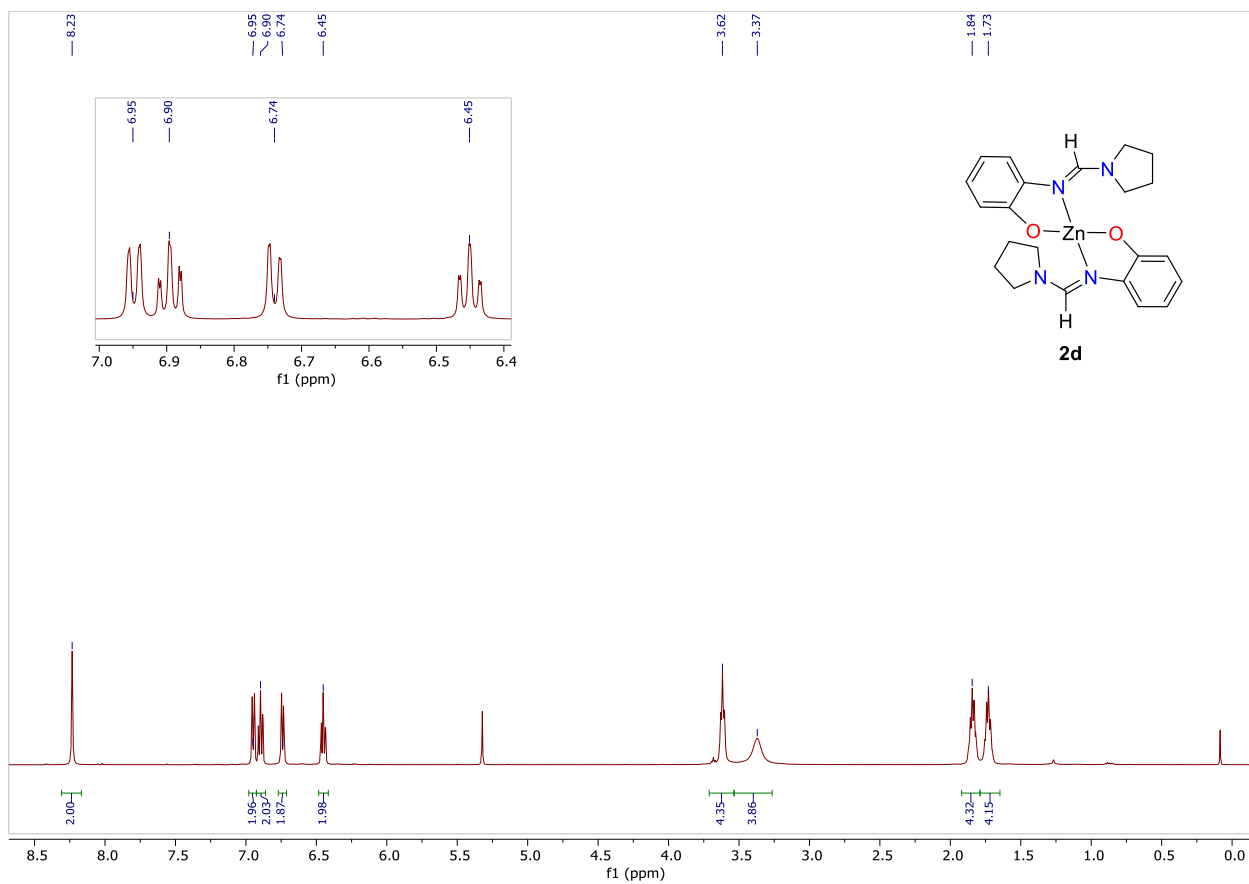

Figure S92  $^1\text{H}$  NMR (500 MHz,  $\text{CD}_2\text{Cl}_2$ , 298 K) of **2d**.

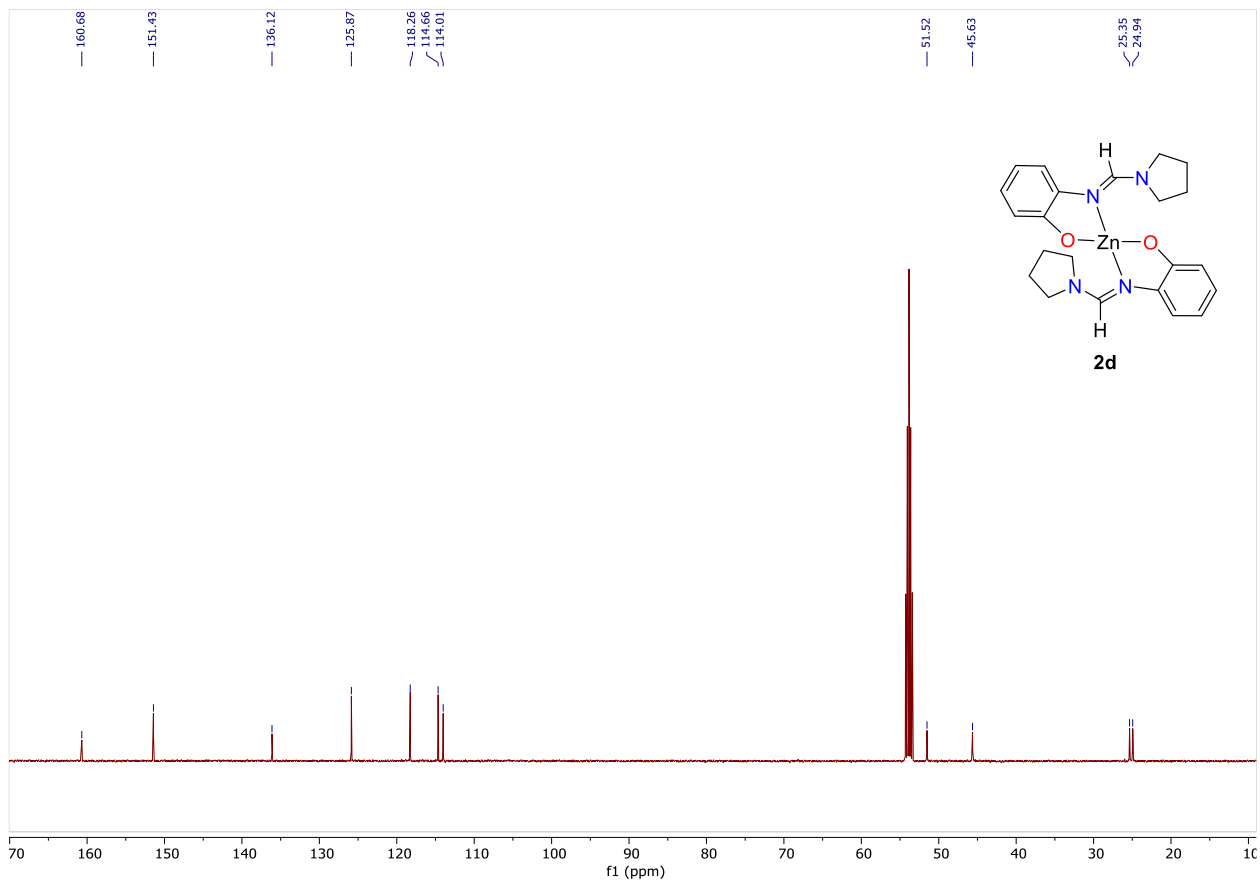

Figure S93  $\{^1\text{H}\}^{13}\text{C}$  NMR (125 MHz,  $\text{CD}_2\text{Cl}_2$ , 298 K) of **2d**.

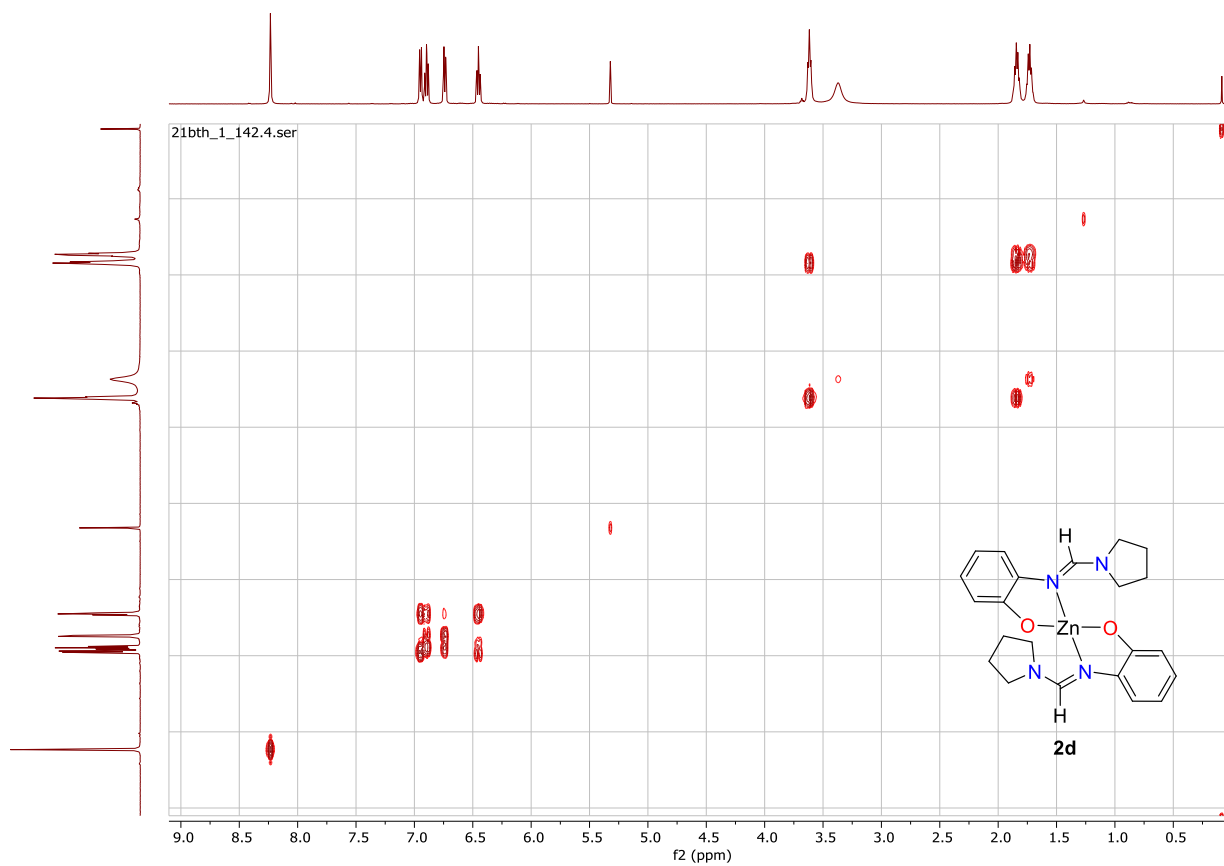

Figure S94  $^1\text{H}$   $^1\text{H}$  COSY (500 MHz,  $\text{CD}_2\text{Cl}_2$ , 298 K) of **2d**.



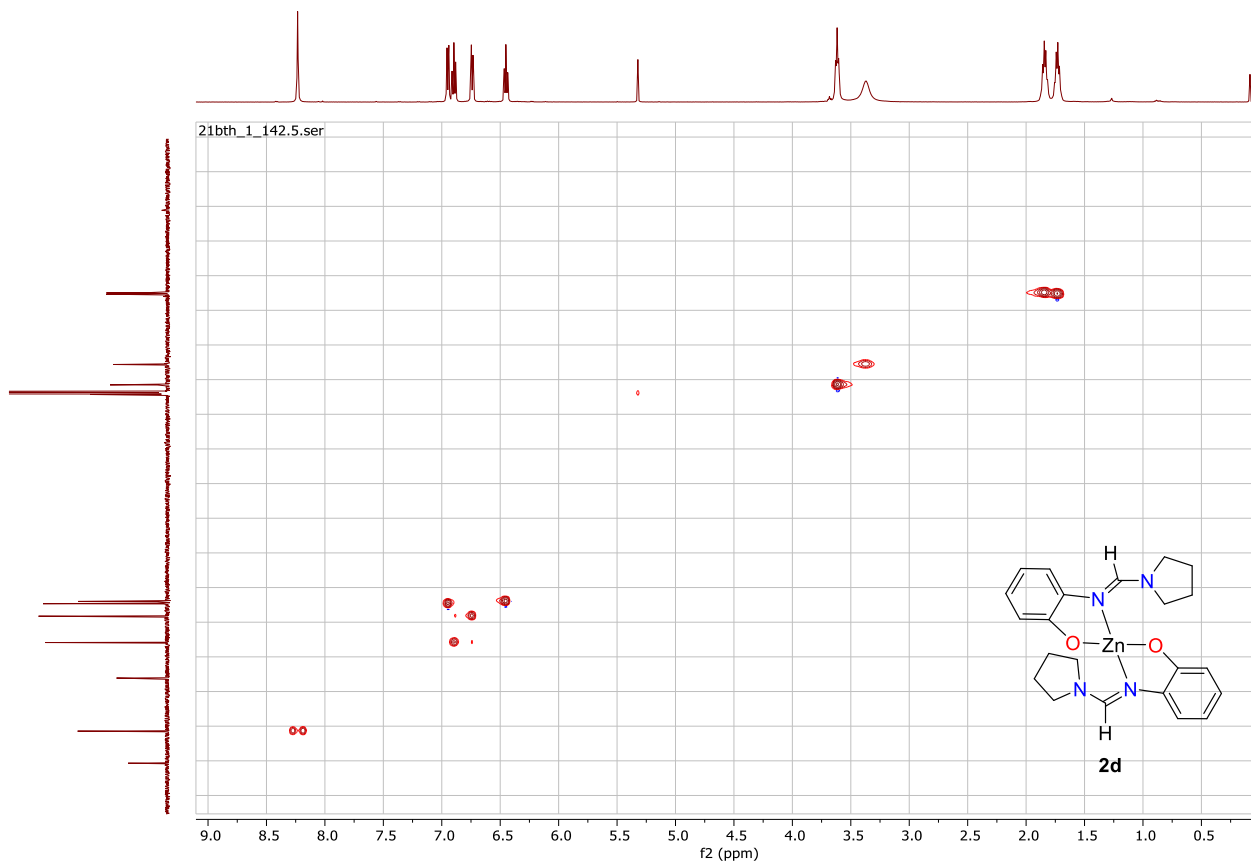

Figure S95  $^1\text{H}$   $^{13}\text{C}$  HSQC (500 MHz / 125 MHz,  $\text{CD}_2\text{Cl}_2$ , 298 K) of **2d**.

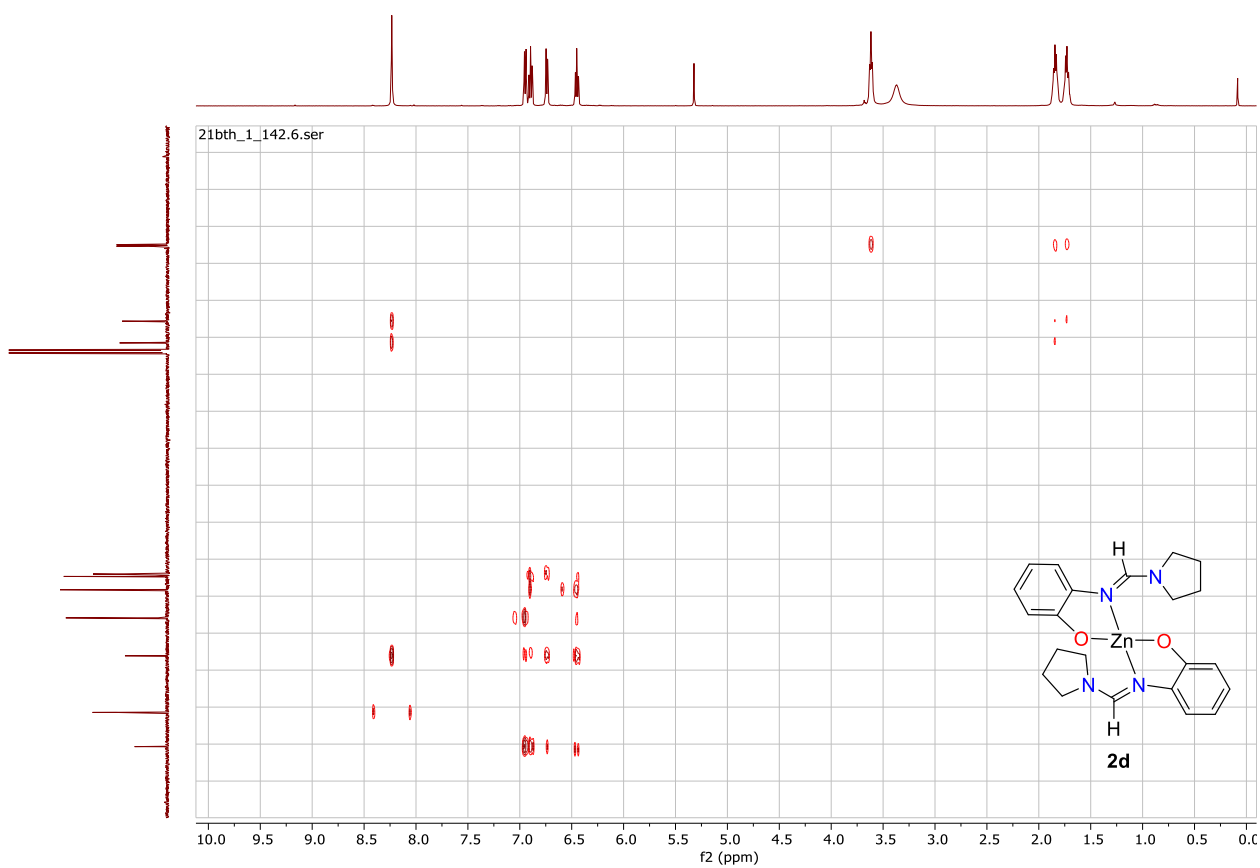

Figure S96  $^1\text{H}$   $^{13}\text{C}$  HMBC (500 MHz / 125 MHz,  $\text{CD}_2\text{Cl}_2$ , 298 K) of **2d**.

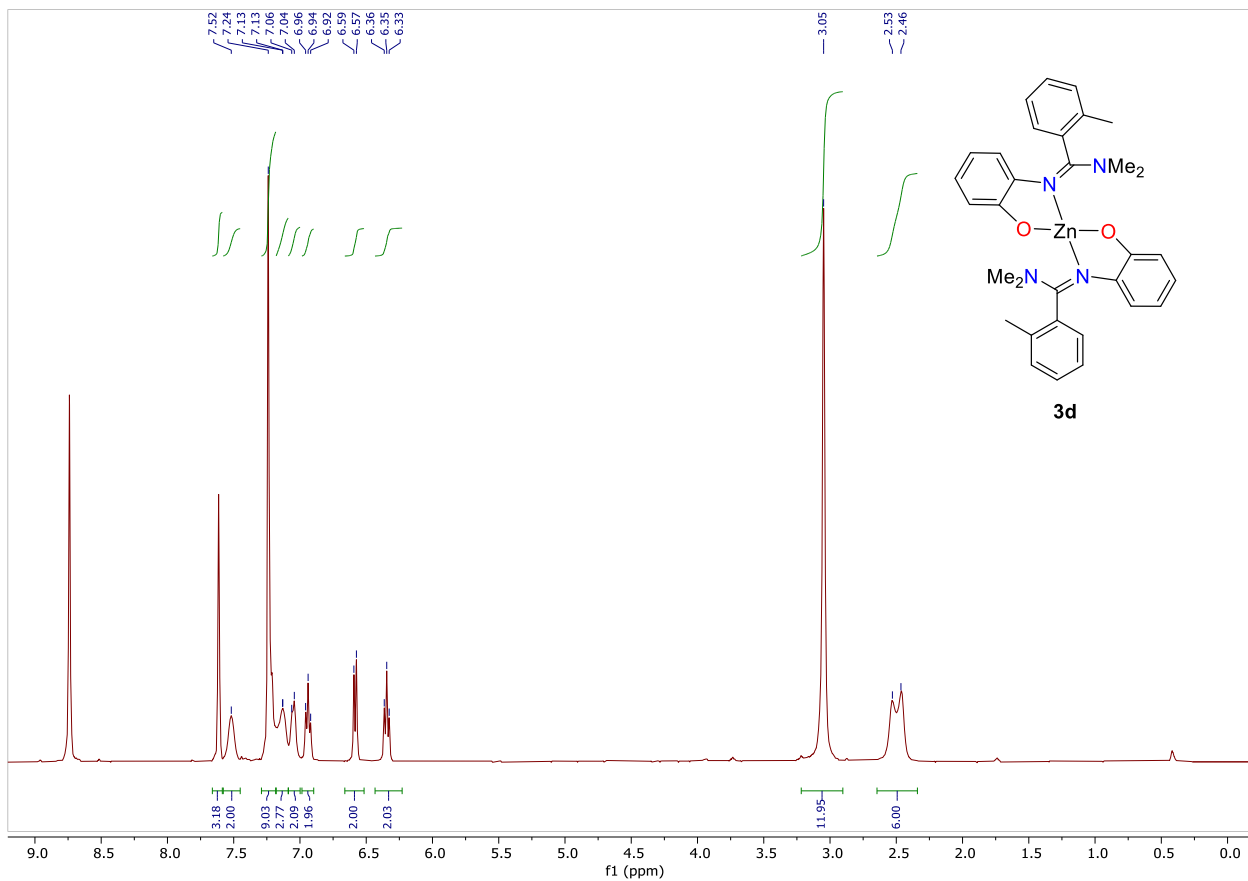

Figure S97  $^1\text{H}$  NMR (400 MHz,  $\text{C}_5\text{D}_5\text{N}$ , 378 K) of **3d**.

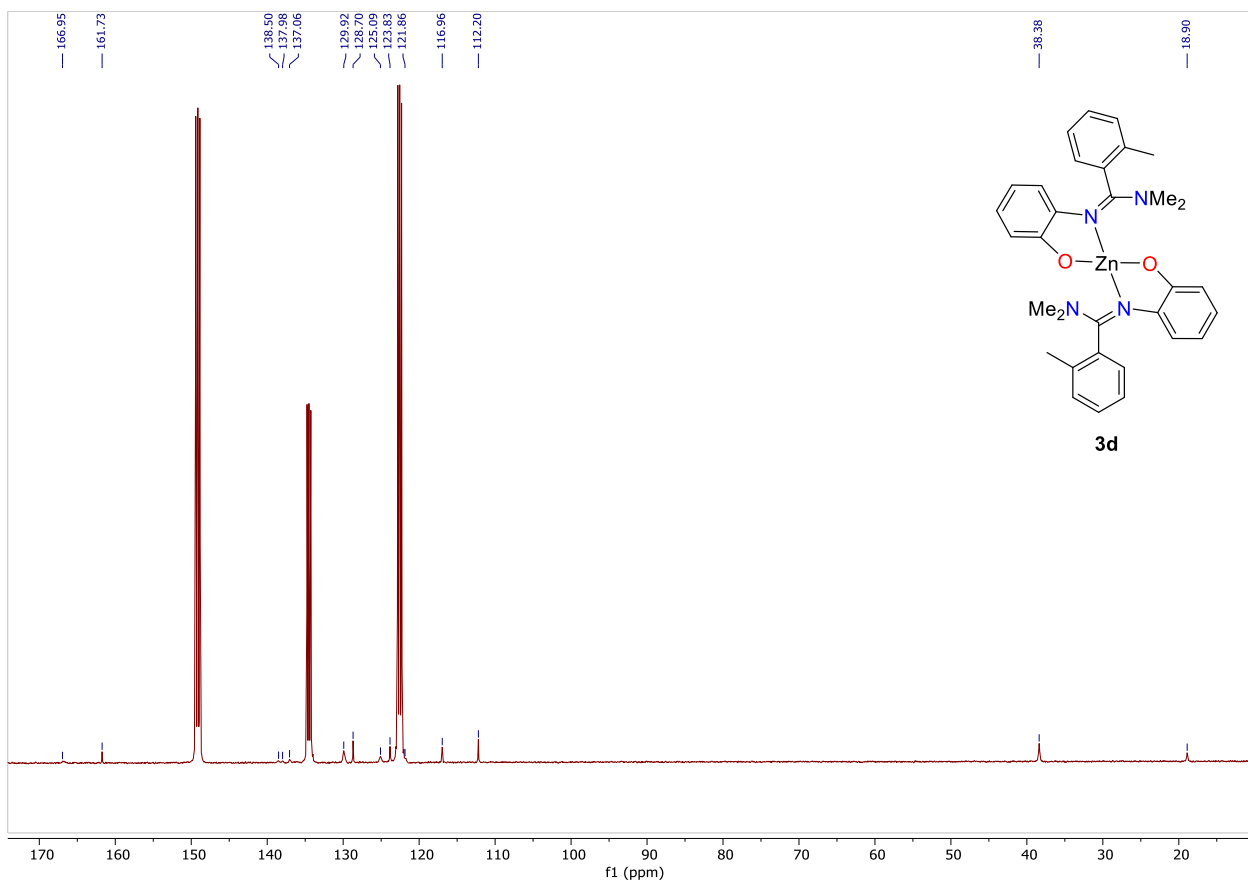

Figure S98  $\{^1\text{H}\}^{13}\text{C}$  NMR (101 MHz,  $\text{C}_5\text{D}_5\text{N}$ , 378 K) of **3d**.

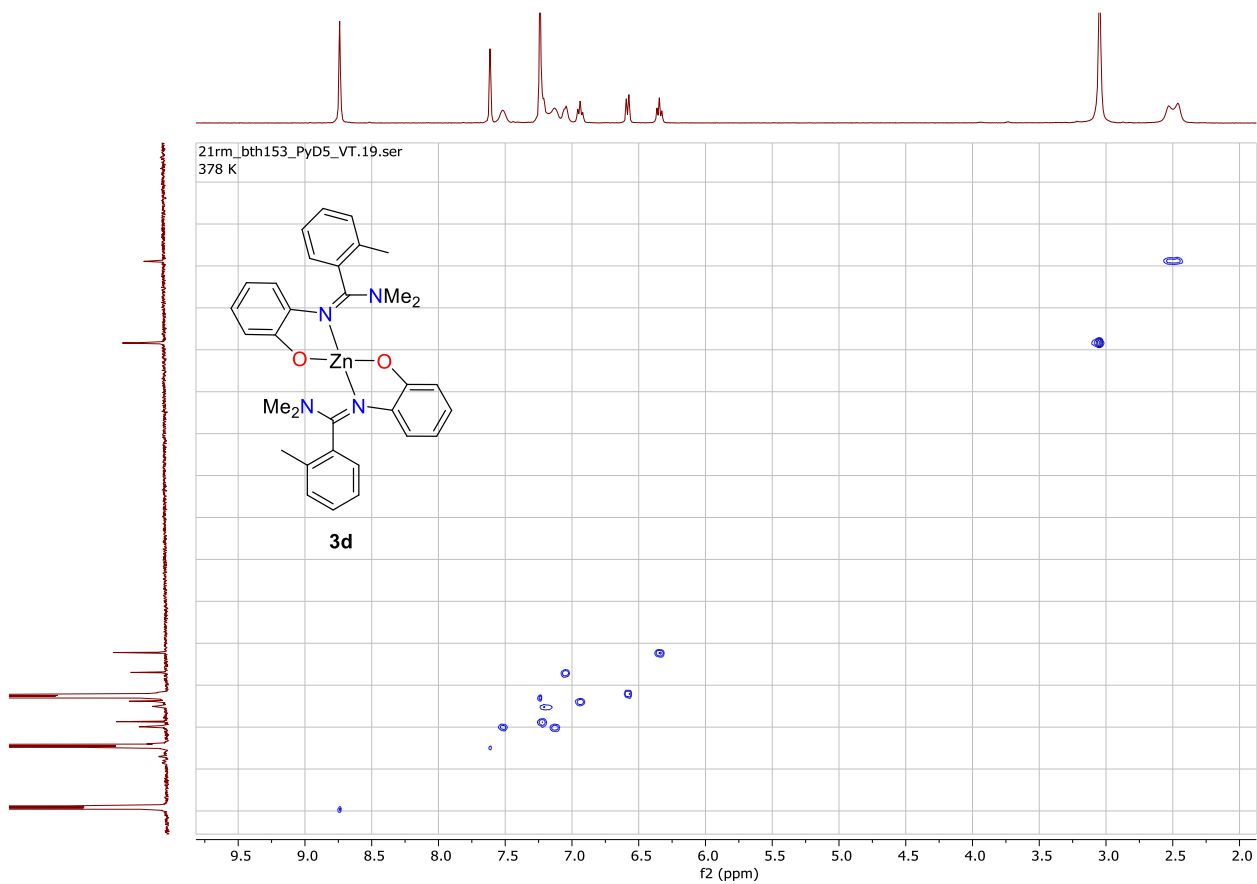

Figure S99  $^1\text{H}$   $^{13}\text{C}$  HSQC (400 MHz / 101 MHz,  $\text{C}_5\text{D}_5\text{N}$ , 378 K) of **3d**.

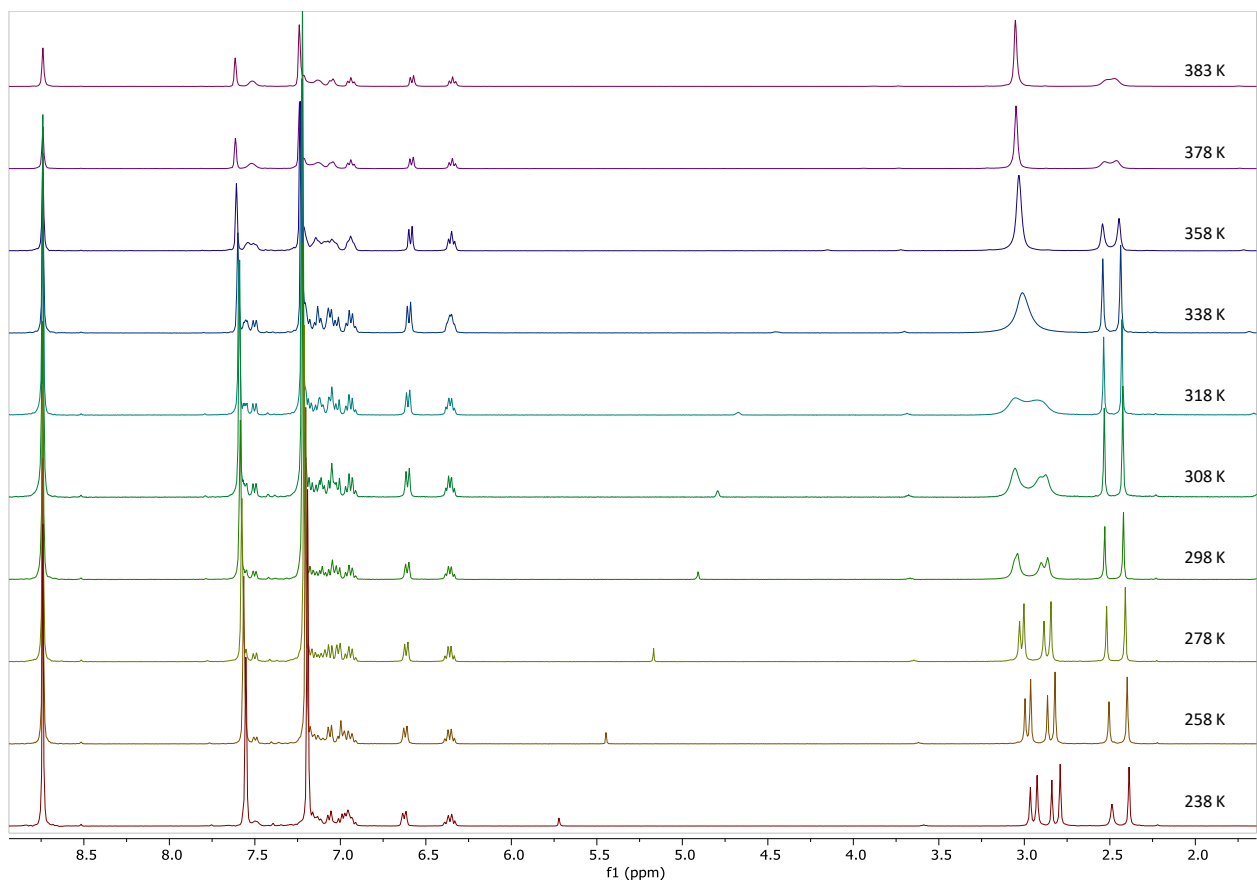

Figure S100 Variable Temperature  $^1\text{H}$  NMR (400 MHz,  $\text{C}_5\text{D}_5\text{N}$ ) of **3d**.

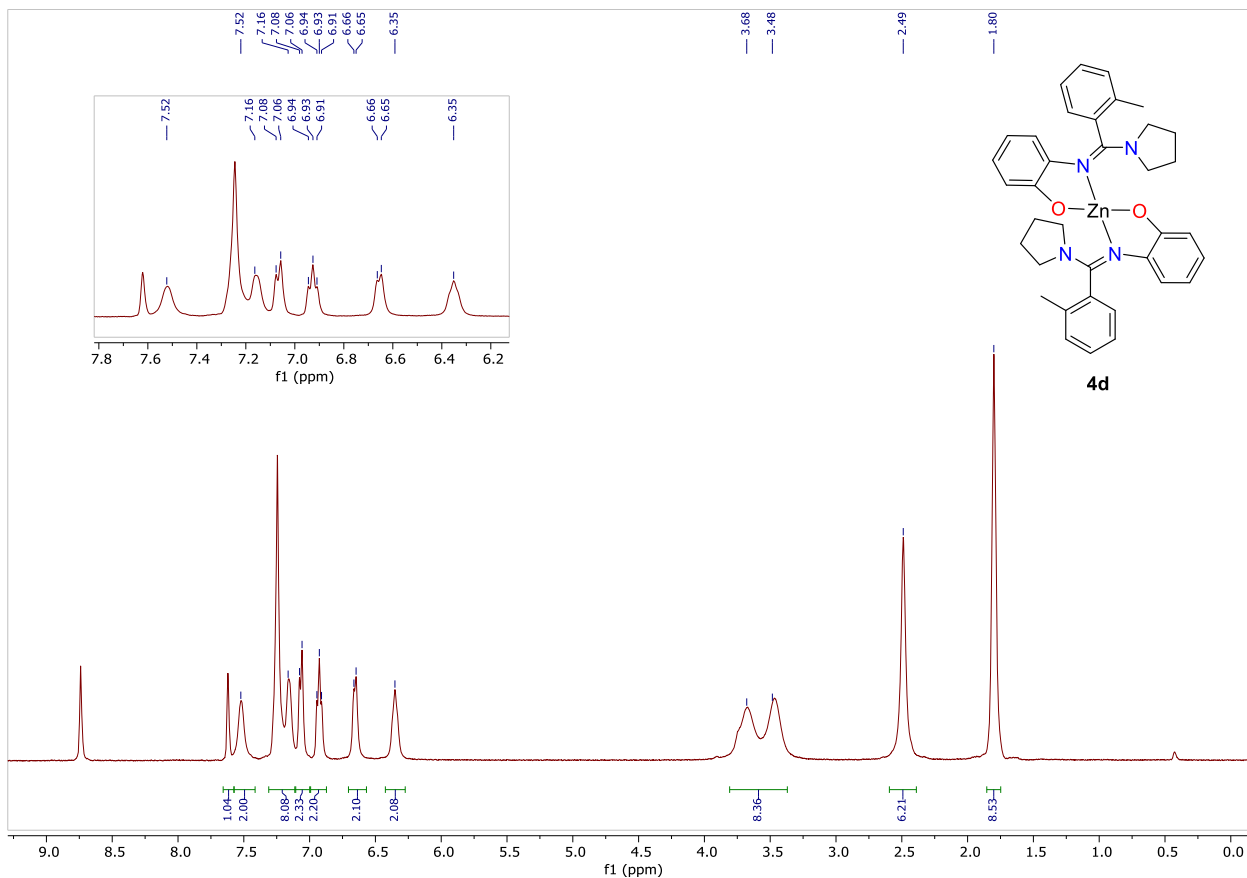

Figure S101  $^1\text{H}$  NMR (400 MHz,  $\text{C}_5\text{D}_5\text{N}$ , 383 K) of **4d**.

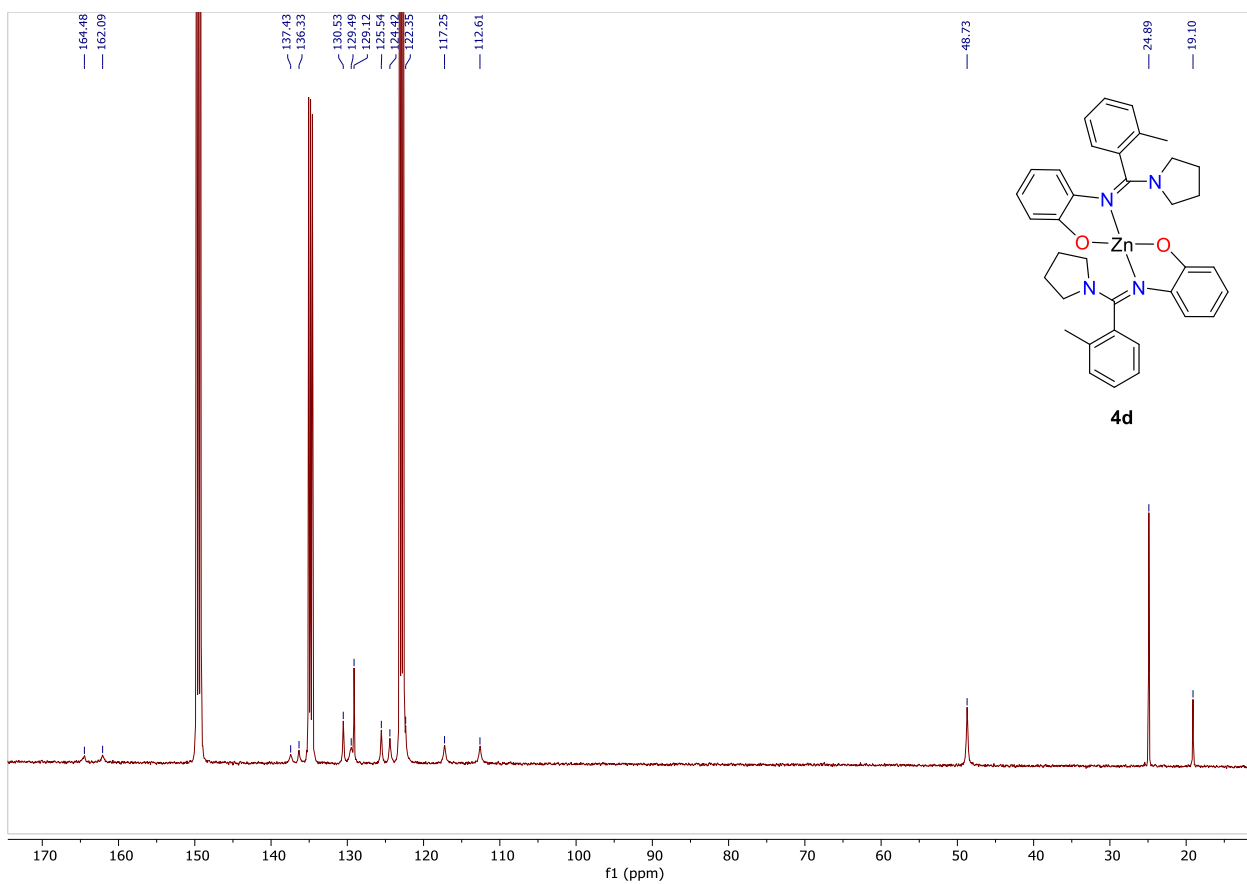

Figure S102  $\{^1\text{H}\}^{13}\text{C}$  NMR (101 MHz,  $\text{C}_5\text{D}_5\text{N}$ , 383 K) of **4d**.

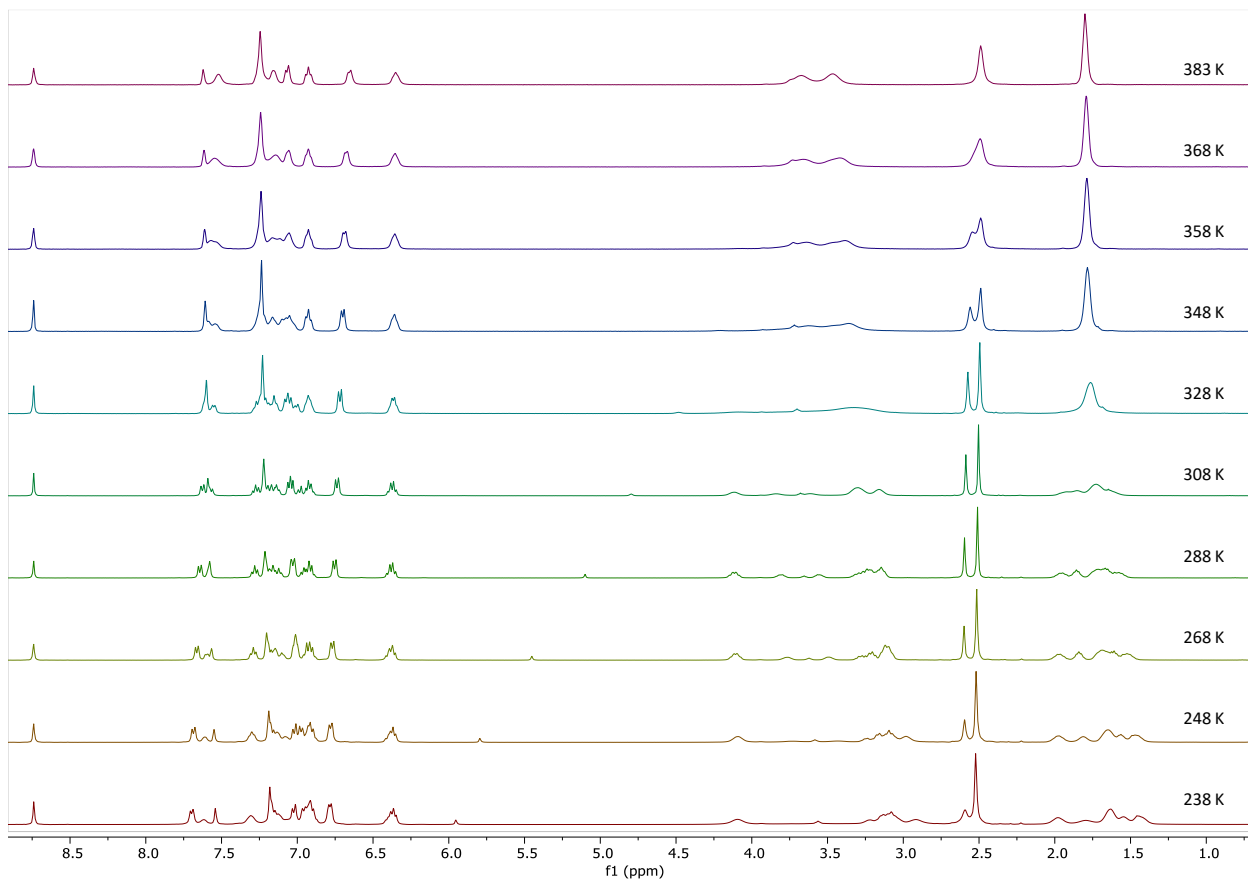

Figure S103 Variable Temperature  $^1\text{H}$  NMR (400 MHz,  $\text{C}_5\text{D}_5\text{N}$ ) of **4d**.

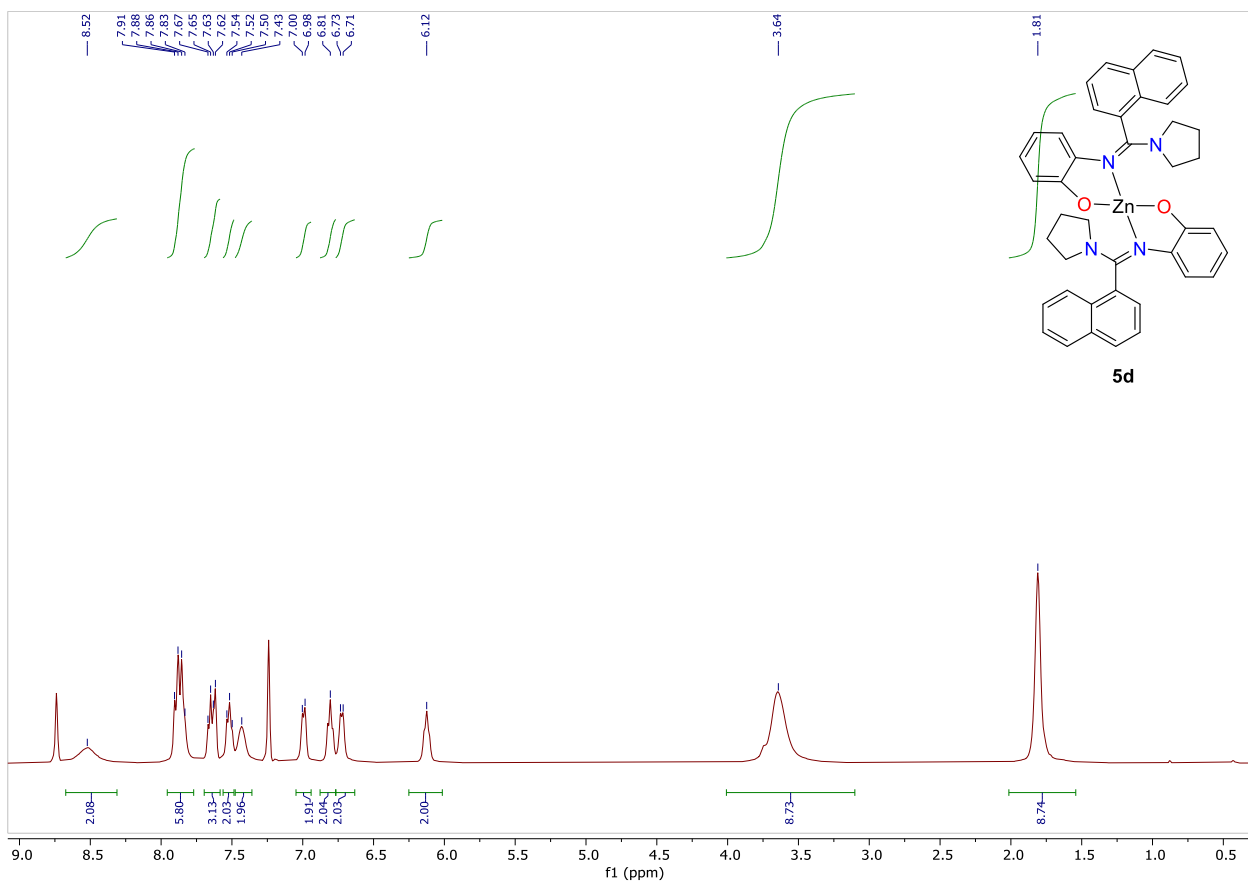

Figure S104  $^1\text{H}$  NMR (400 MHz,  $\text{C}_5\text{D}_5\text{N}$ , 383 K) of **5d**.

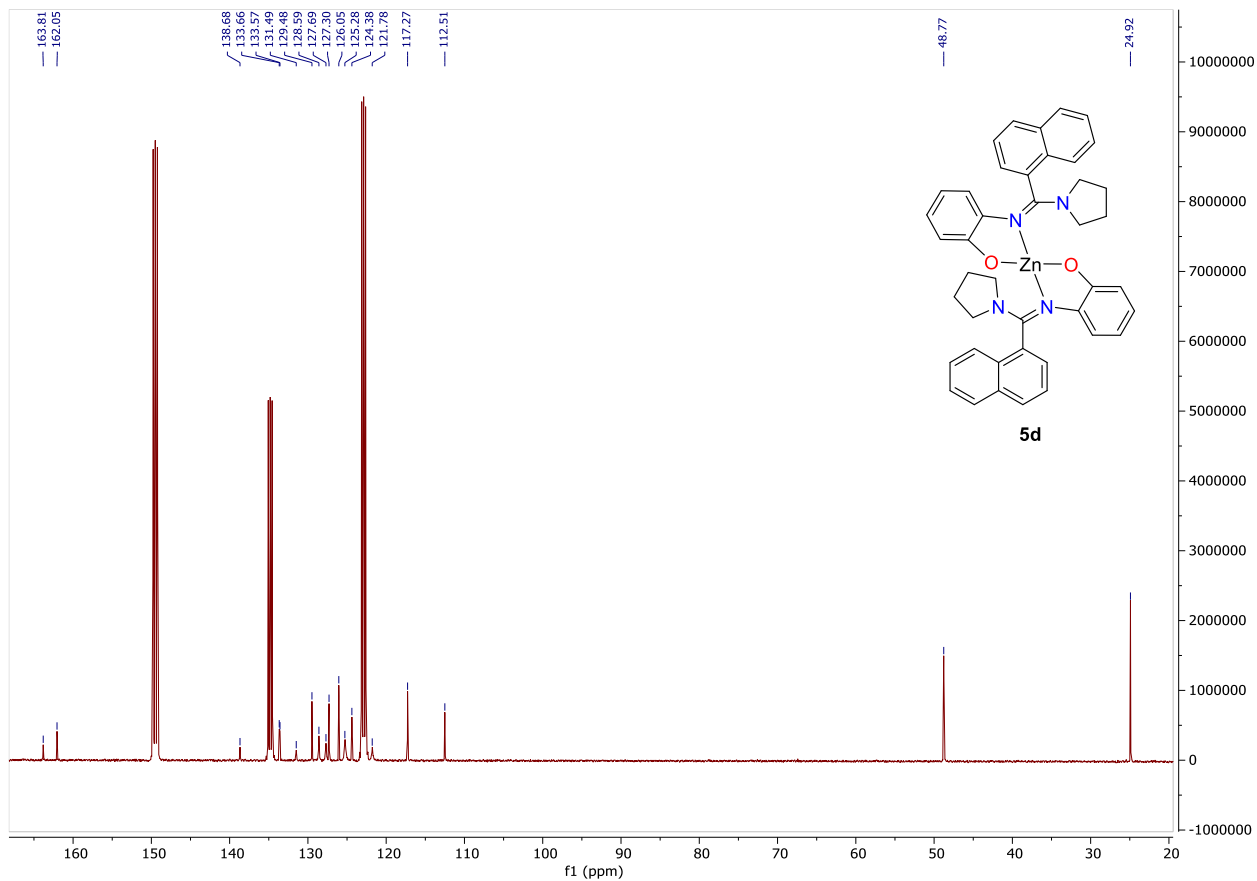

Figure S105  $\{^1\text{H}\}^{13}\text{C}$  NMR (101 MHz,  $\text{C}_5\text{D}_5\text{N}$ , 383 K) of **5d**.

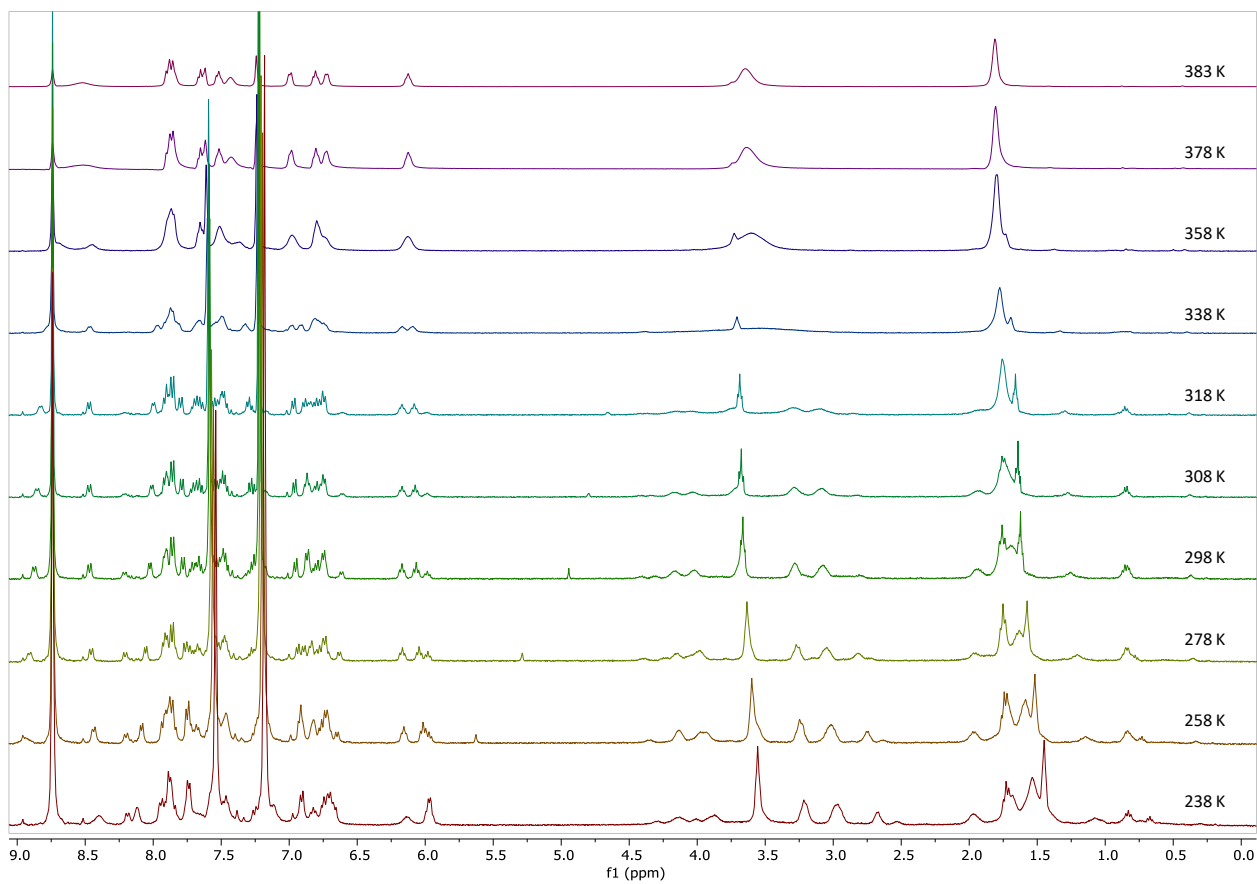

Figure S106 Variable Temperature  $^1\text{H}$  NMR (400 MHz,  $\text{C}_5\text{D}_5\text{N}$ ) of **5d**.

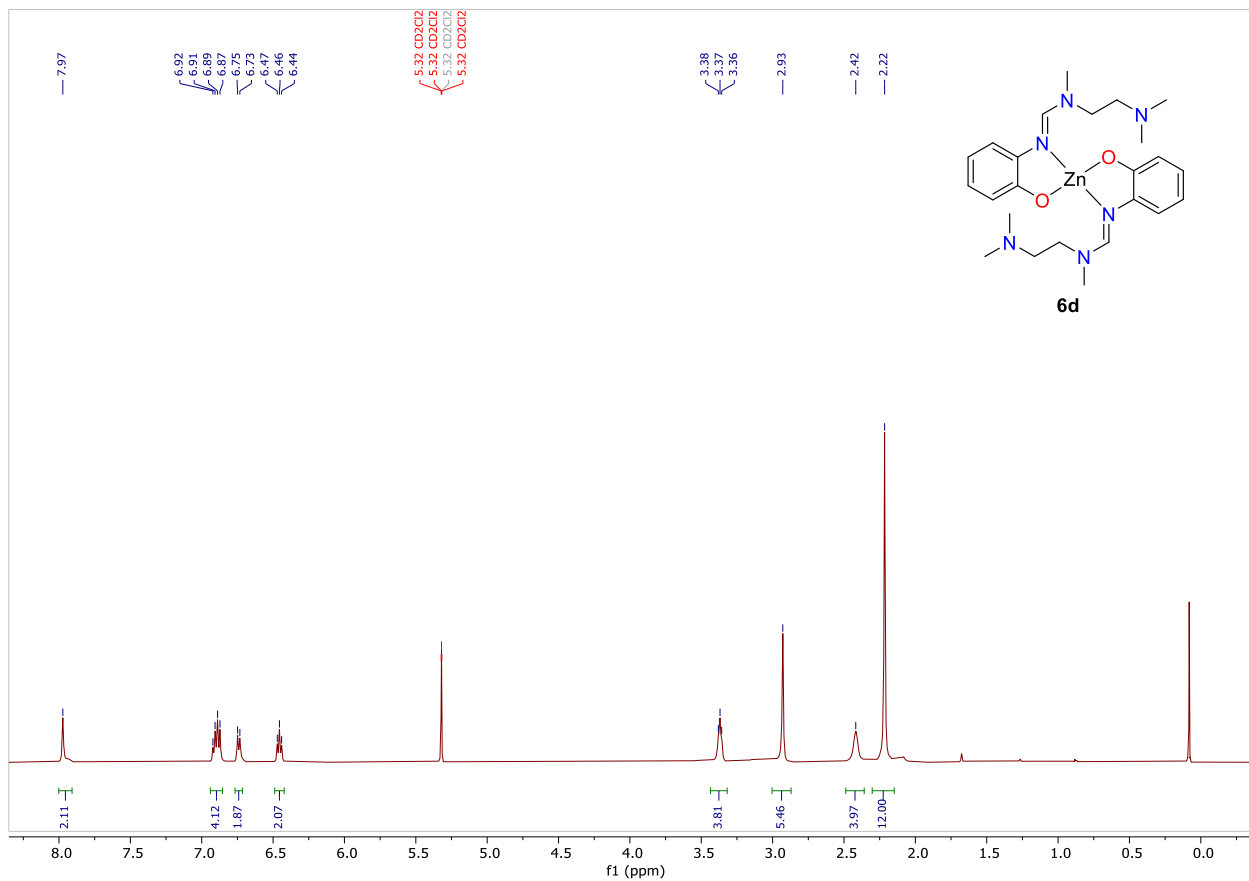

Figure S107 <sup>1</sup>H (500 MHz, CD<sub>2</sub>Cl<sub>2</sub>, 298 K) of **6d**.

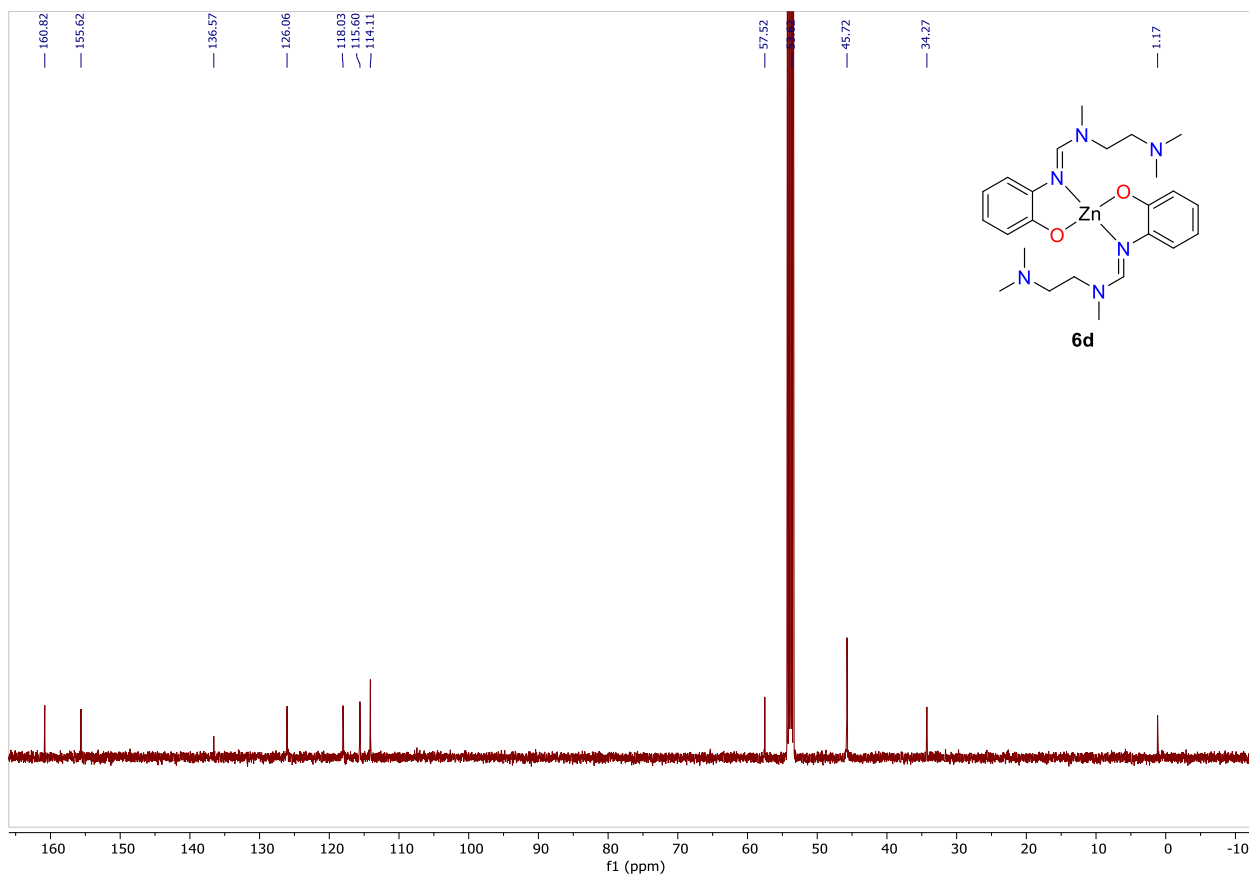

Figure S108 <sup>13</sup>C (500 MHz, CD<sub>2</sub>Cl<sub>2</sub>, 298 K) of **6d**.

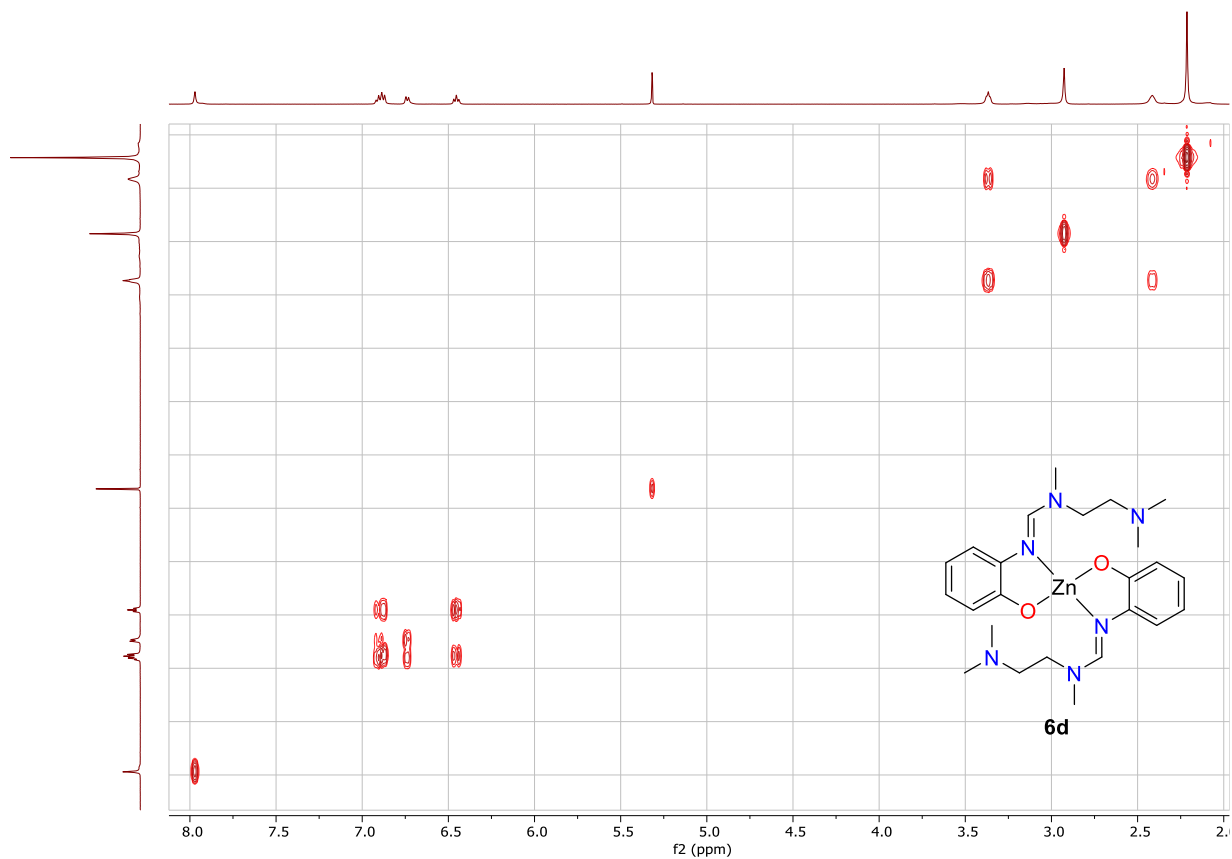

Figure S109  $^1\text{H}$   $^1\text{H}$  COSY (125 MHz / 125 MHz,  $\text{CD}_2\text{Cl}_2$ , 298 K) of **6d**.

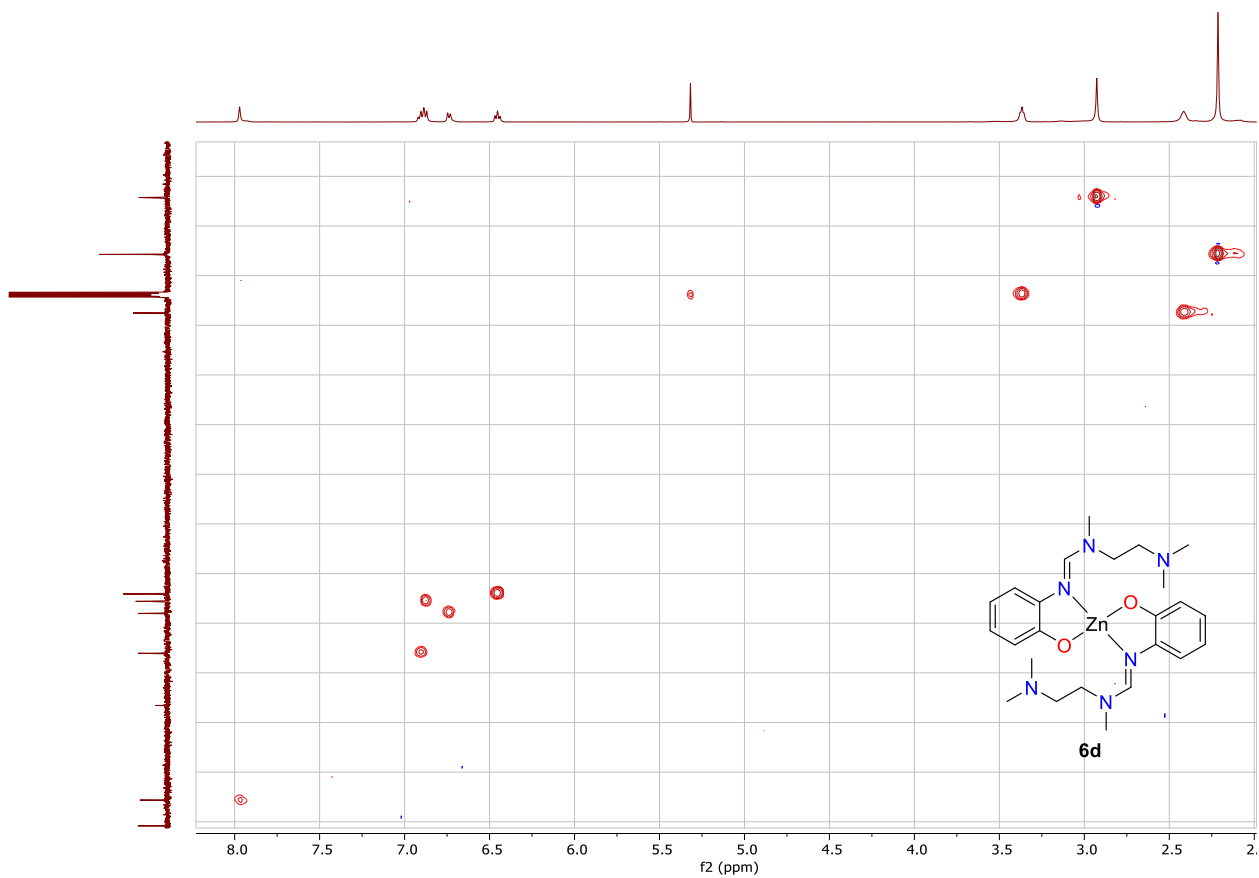

Figure S110  $^1\text{H}$   $^{13}\text{C}$  HSQC (500 MHz / 125 MHz,  $\text{CD}_2\text{Cl}_2$ , 298 K) of **6d**.



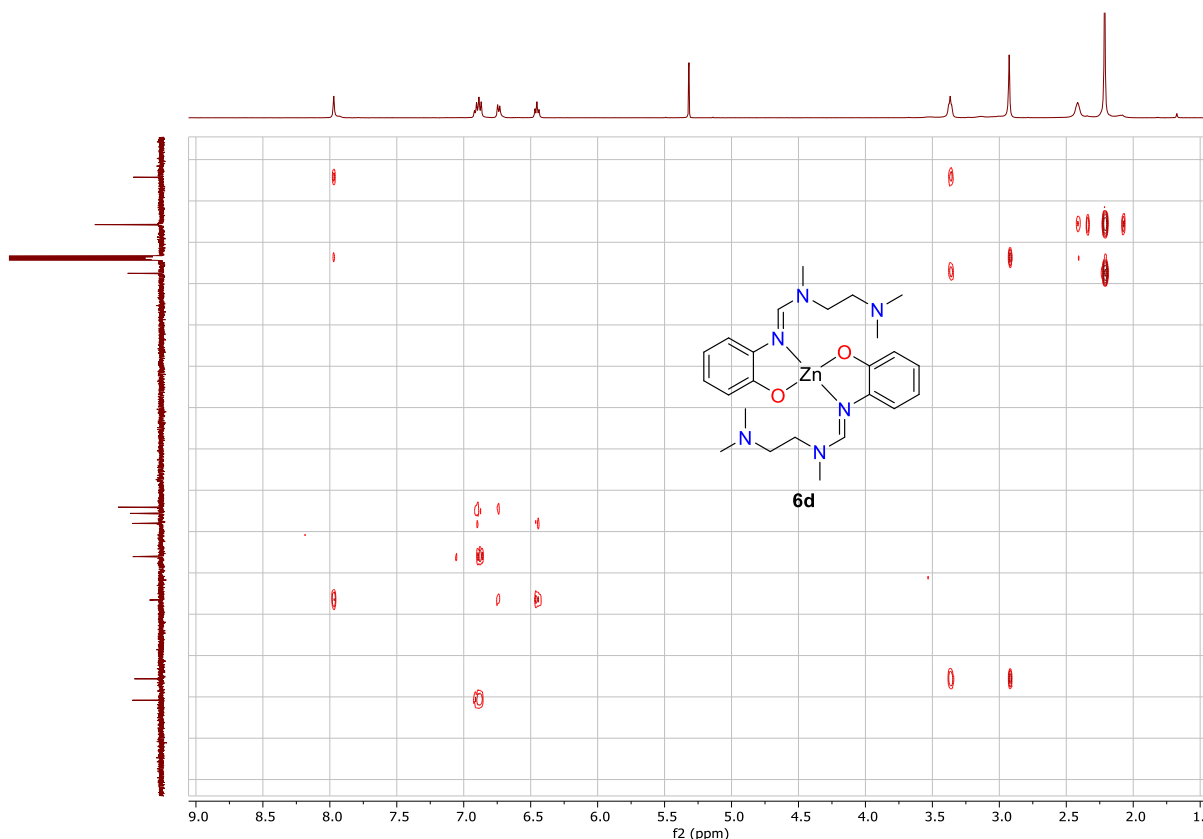

Figure S111  $^1\text{H}$   $^{13}\text{C}$  HMBC (500 MHz / 125 MHz,  $\text{CD}_2\text{Cl}_2$ , 298 K) of **6d**.

#### DOSY analyses

All spectra were recorded on an Avance III HD 600 MHz Bruker spectrometer equipped with a 5 mm Prodigy probe, and using 5 mm NMR tubes at 298K. The samples were prepared as follow: 15  $\mu\text{mol}$  of the analyte were dissolved in 500  $\mu\text{L}$  of  $\text{CD}_2\text{Cl}_2$  (or Pyridine- $\text{D}_5$ ) then introduced in a 5 mm NMR tube and finally introduced in the magnet. The specific parameters of each sample (d1, p1, ns, rg) were optimized on a standard 1D acquisition ( $^1\text{H}$  sequence zg30, 16 scans), and recalled in the dosy experiment (ledbpgp2s, 32 points, linear gradient from 95% to 5%). The diffusion delay d20 was fixed at 0,01 s, while the diffusion gradient length p30 was adapted to get a 95% intensity decrease between the first spectrum and the last one. DOSY data were processed using Topspin 3.5 p17 with the dosy2d exponential processing method. All diffusion coefficients were read on the two-dimensional spectrum obtained after processing.

The Stokes–Einstein equation (1) for diffusion of spherical particles was used to calculate the hydrodynamic radius of spherical particle.

$$r_H = kT/6\pi\eta D \text{ (equation 1)}$$

D is the diffusion coefficient ( $\text{m}^2 \text{s}^{-1}$ )

k is the Boltzmann constant ( $k = 1.38065 \times 10^{-23} \text{ kg m}^2 \text{ s}^{-2} \text{ K}^{-1}$ )

T is the absolute temperature ( $T = 298 \text{ K}$ )

$\eta$  is the dynamic viscosity ( $\text{CD}_2\text{Cl}_2$  :  $\eta = 4.13 \times 10^{-4} \text{ kg m}^{-1} \text{ s}^{-1}$ )

$r_H$  is the hydrodynamic radius of the spherical particle (m)

OLEX2 was used to determine the hydrodynamic radius ( $r'_H$ ) from the molecular volume based on the XRD structure (equation 2).

$$r'_H = \sqrt[3]{(3V/4\pi)} \text{ (equation 2)}$$

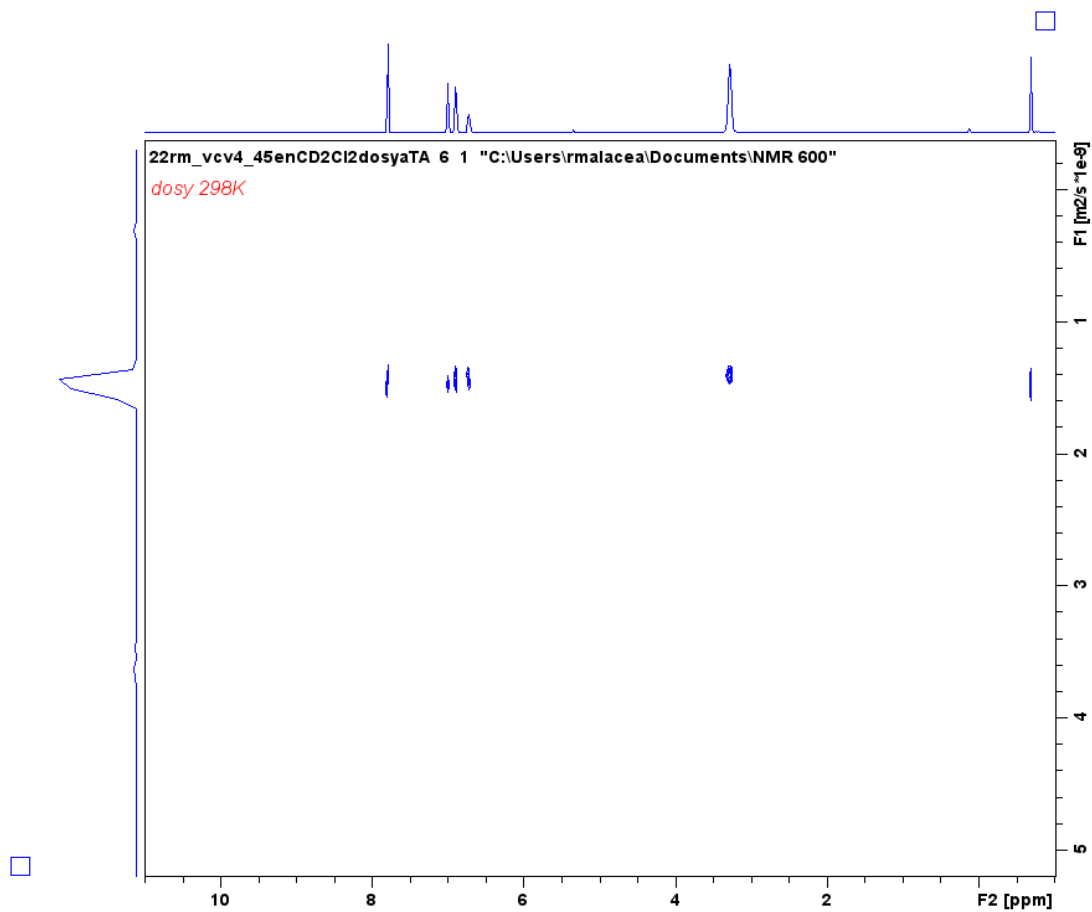

Figure S112 Processed DOSY spectrum for **1a** in CD<sub>2</sub>Cl<sub>2</sub> ( $1.45 \cdot 10^{-9} \text{m}^2/\text{s}$ )

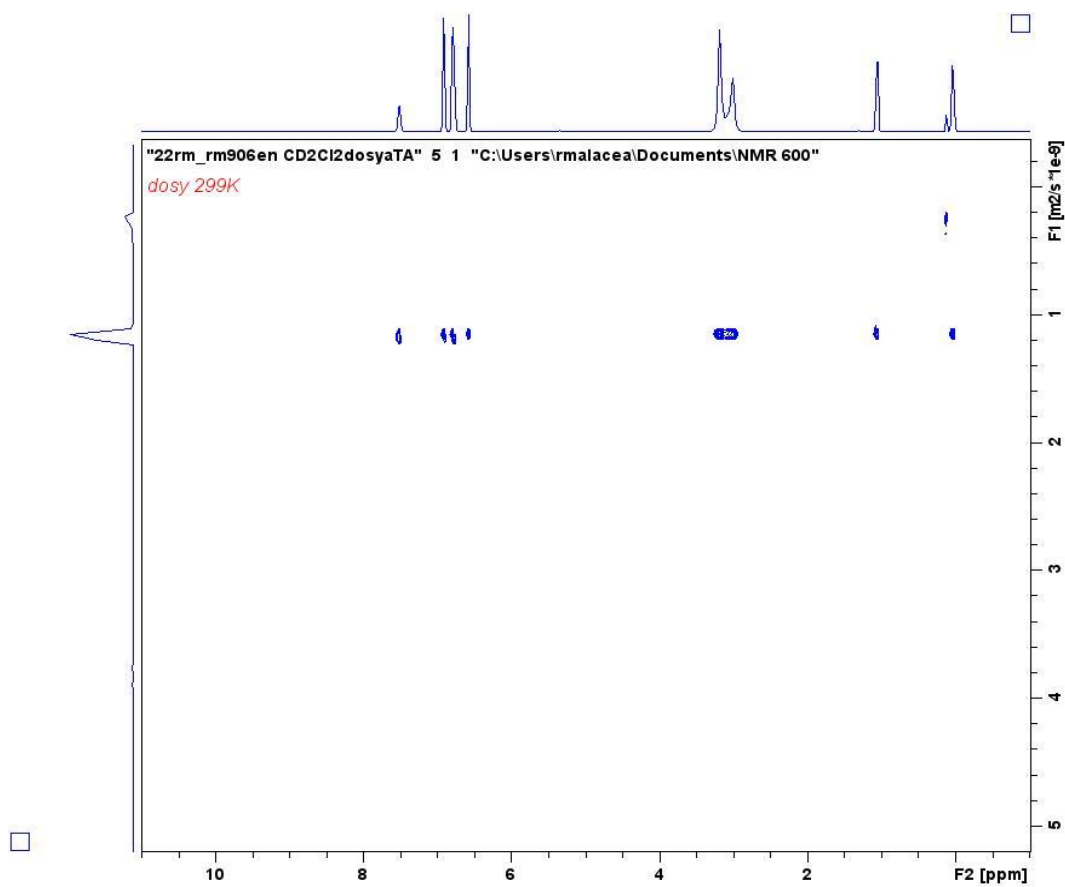

Figure S113 Processed DOSY spectrum for **1c** in CD<sub>2</sub>Cl<sub>2</sub> ( $1.15 \cdot 10^{-9} \text{m}^2/\text{s}$ )

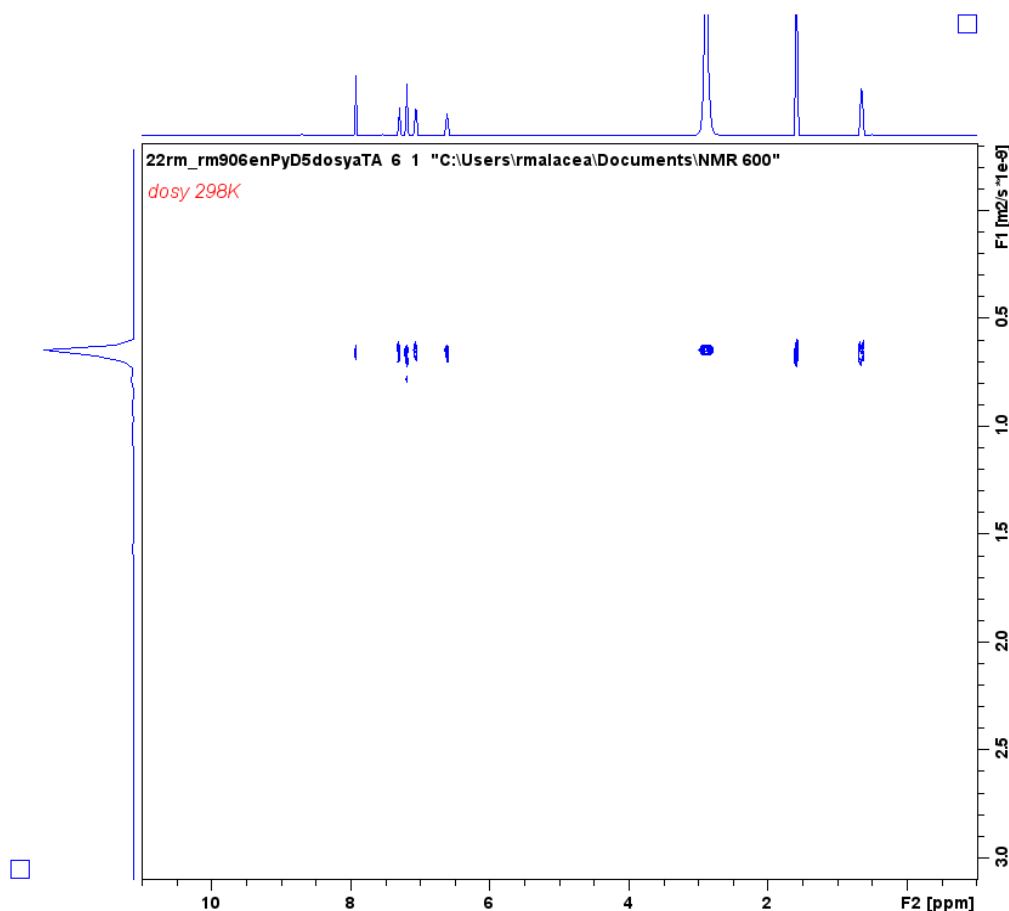

Figure S114 Processed DOSY spectrum for **1c** in  $\text{CD}_2\text{Cl}_2$  ( $0.66 \cdot 10^{-9} \text{m}^2/\text{s}$ )

**Table S1** Comparison of the hydrodynamic radius ( $r_H$ ) estimated from the diffusion coefficients with the hydrodynamic radius ( $r'_H$ ) determined from the XRD structure for complexes **1a** and **1c**.

| Complex                               | D ( $\text{m}^2/\text{s}$ ) | Radius ( $\text{\AA}$ )<br>$r_H$ | Complex              | Volume ( $\text{\AA}^3$ ) | Radius ( $\text{\AA}$ )<br>$r'_H$ |
|---------------------------------------|-----------------------------|----------------------------------|----------------------|---------------------------|-----------------------------------|
| <b>1a</b> in $\text{CD}_2\text{Cl}_2$ | $1.45 \cdot 10^{-9}$        | 3.64                             | <b>1a</b> (dimer)    | 388.14                    | 4.53                              |
|                                       |                             |                                  | <b>1a</b> (monomer)  | 198.96                    | <b>3.62</b>                       |
| <b>1c</b> in $\text{CD}_2\text{Cl}_2$ | $1.15 \cdot 10^{-9}$        | 4.60                             | <b>1c</b> (dimer)    | 371.45                    | <b>4.46</b>                       |
|                                       |                             |                                  | <b>1c</b> (monomer)  | 187.51                    | 3.55                              |
| <b>1c</b> in Pyridine -D5             | $0.66 \cdot 10^{-9}$        | 3.76                             | <b>1c</b> in (dimer) | 371.45                    | 4.46                              |
|                                       |                             |                                  | <b>1c</b> (monomer)  | 187.51                    | <b>3.55</b>                       |

### Experimental procedure for the synthesis of **7d**

In a glovebox, 197.24 mg (1 mmol) of *N*-benzylidene-2-hydroxyaniline were solubilized in 10 mL of dried THF. 0.5 mL (0.5 mmol, 0.5 equiv.) of a 1 M solution of  $\text{ZnEt}_2$  in hexane was added and the mixture was stirred at r.t. for 2 h. The volatiles were evaporated under vacuum and the solid obtained was washed with 4 mL of pentane before being dried under vacuum affording **7d** as a reddish powder (115 mg, 50% yield). **Elemental Analysis:** calcd for  $\text{C}_{26}\text{H}_{20}\text{N}_2\text{O}_2\text{Zn}$ : C, 68.21; H, 4.40; N, 6.12. Found: C, 68.08; H, 4.36; N, 5.81.  **$^1\text{H}$  NMR (500 MHz,  $\text{CD}_2\text{Cl}_2$ , 298 K):**  $\delta$ (ppm) = 8.27 (s, 2H), 7.62-7.47 (broad signal, 4H), 7.37-7.25 (broad signal, 2H), 7.22-7.02 (broad signal, 8H), 6.94-6.80 (broad signal, 2H), 6.57 (t,  $J = 7.4$  Hz, 2H).  **$\{^1\text{H}\}^{13}\text{C}$  NMR (126 MHz,  $\text{CD}_2\text{Cl}_2$ , 298 K):**  $\delta$ (ppm) = 163.08, 158.54, 135.50, 134.15, 132.62, 131.37, 129.38, 128.99, 120.70, 116.68, 115.41.

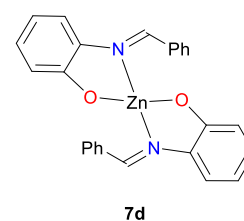

## Polymer characterization

Representative homonuclear decoupled  $^1\text{H}$  NMR spectrum:

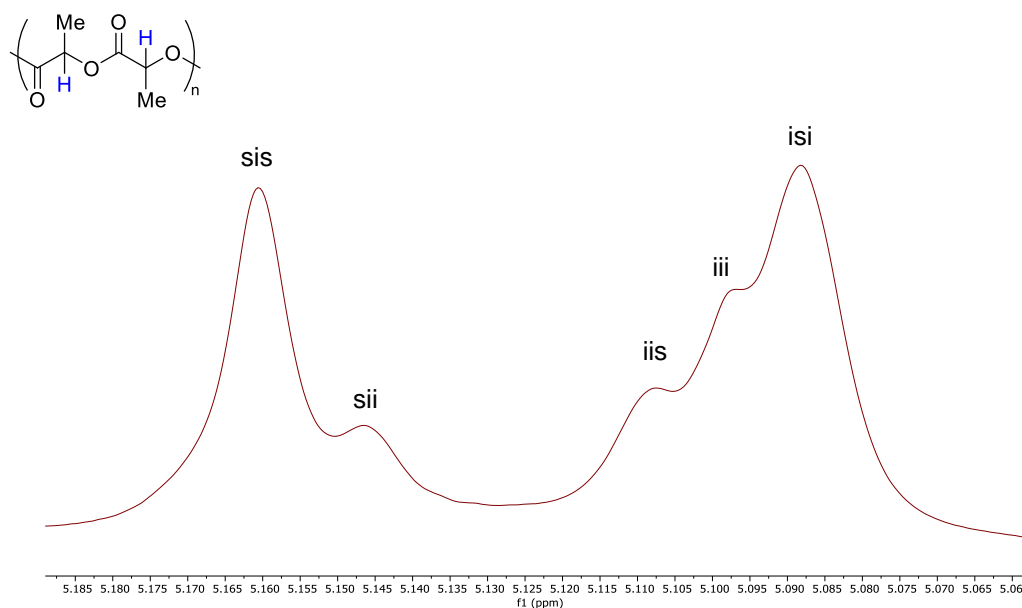

Figure S115 Homonuclear decoupled  $^1\text{H}$  NMR ( $\text{CDCl}_3$ ) spectra of purified PLA ( $Pr = 0.77$ ) product from the solution polymerisation of *rac*-LA at 20 °C for 2 h using **1c**, displaying the five tetrad possibilities in the methine region (blue)

## MALDI-ToF spectra

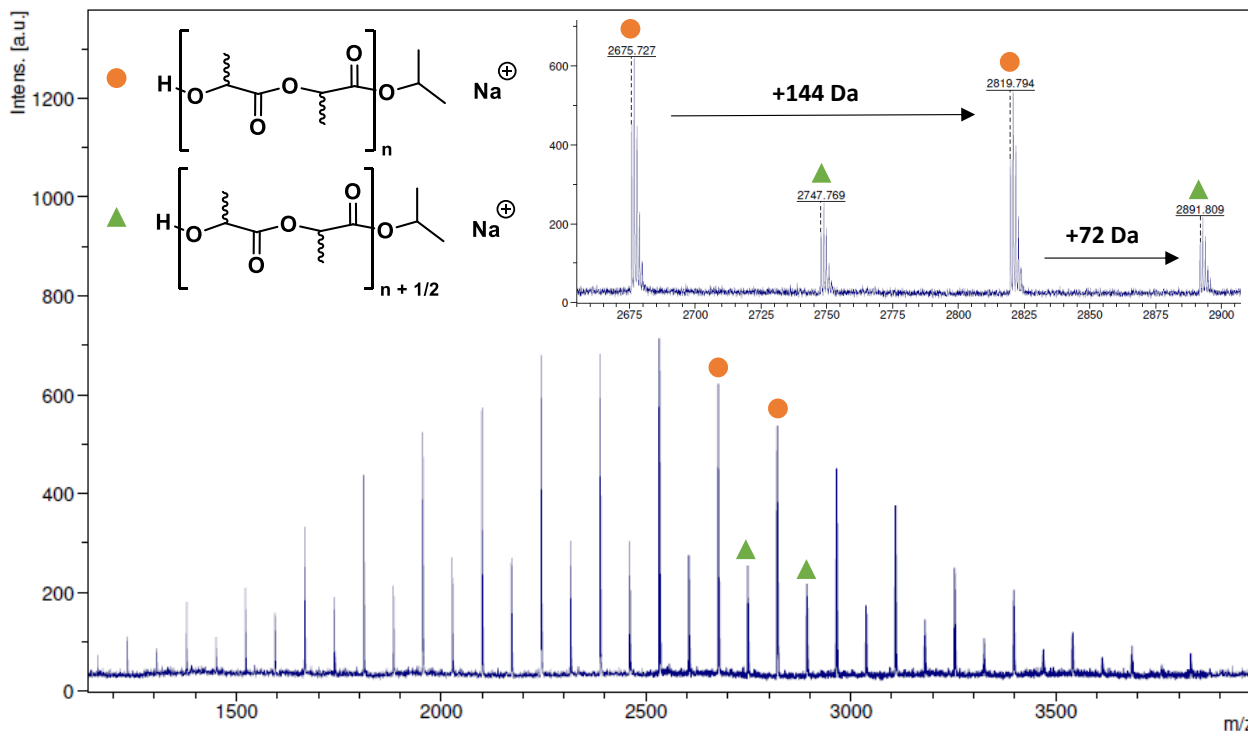

Figure S116 MALDI-ToF spectrum of PLA produced using **1b'** (90 °C, 4 h, 25% conv., 100:1:1). Magnified version is provided to assist in identifying the repeat unit.

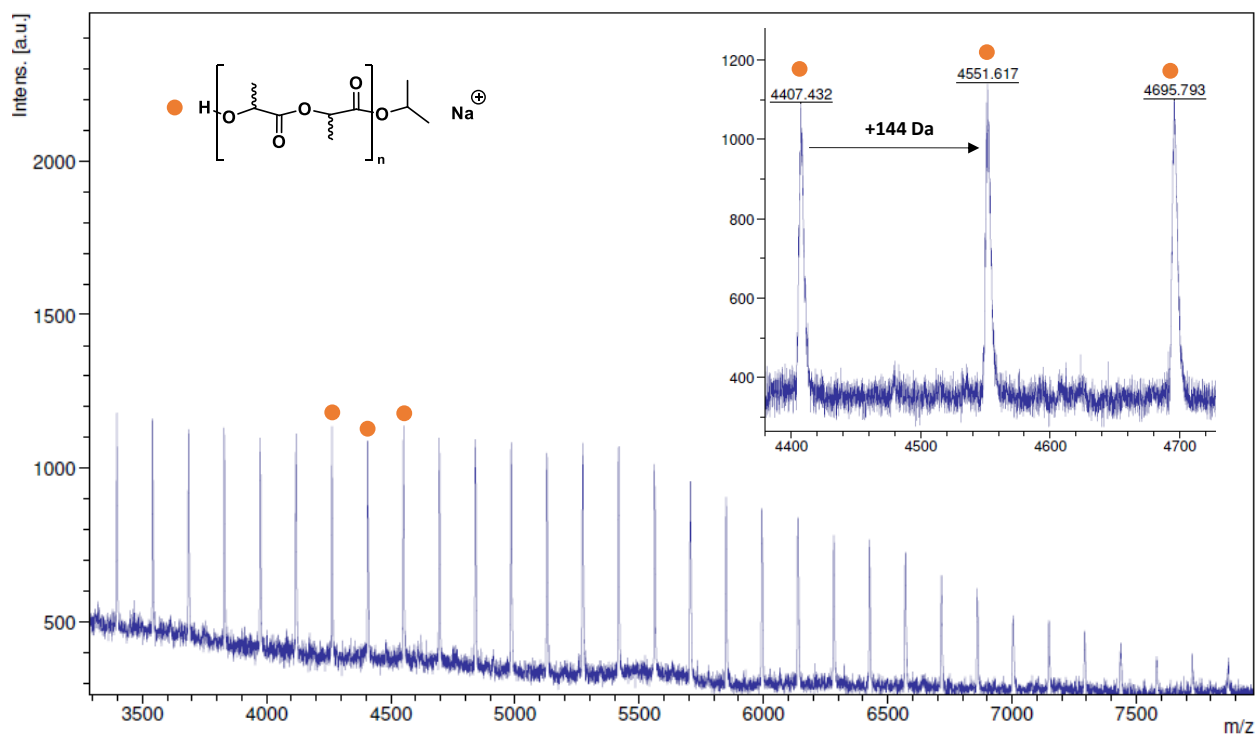

Figure S117 MALDI-ToF spectrum of PLA produced using **6c** with *i*PrOH as co-initiator (20 °C, 40 min, 42% conv., 100:1:1). Magnified version is provided to assist in identifying the repeat unit.

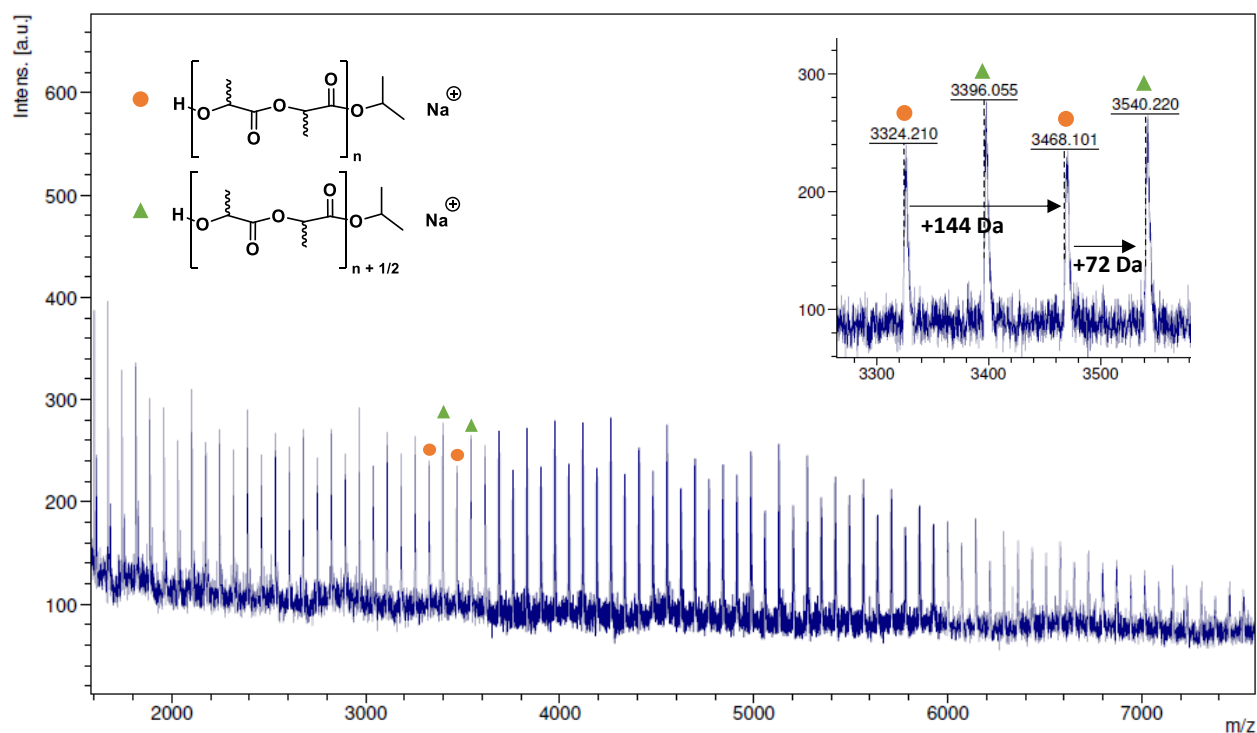

Figure S118 MALDI-ToF spectrum of PLA produced using **6c** with *i*PrOH as co-initiator (20 °C, 2 h, 100% conv., 25:1:1). Magnified version is provided to assist in identifying the repeat unit.

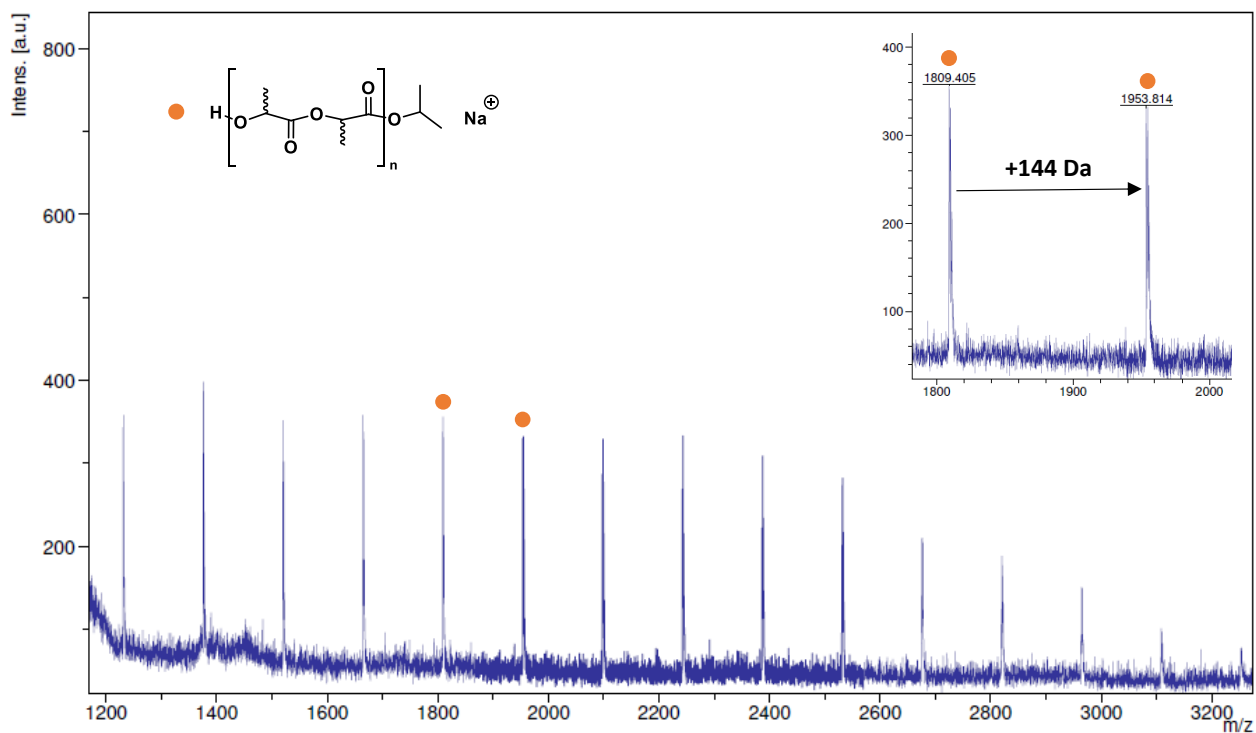

Figure S119 MALDI-ToF spectrum of PLA produced using **6d** with *i*PrOH as co-initiator (30 °C, 40 min, 20% conv., 100:1:1). Magnified version is provided to assist in identifying the repeat unit.

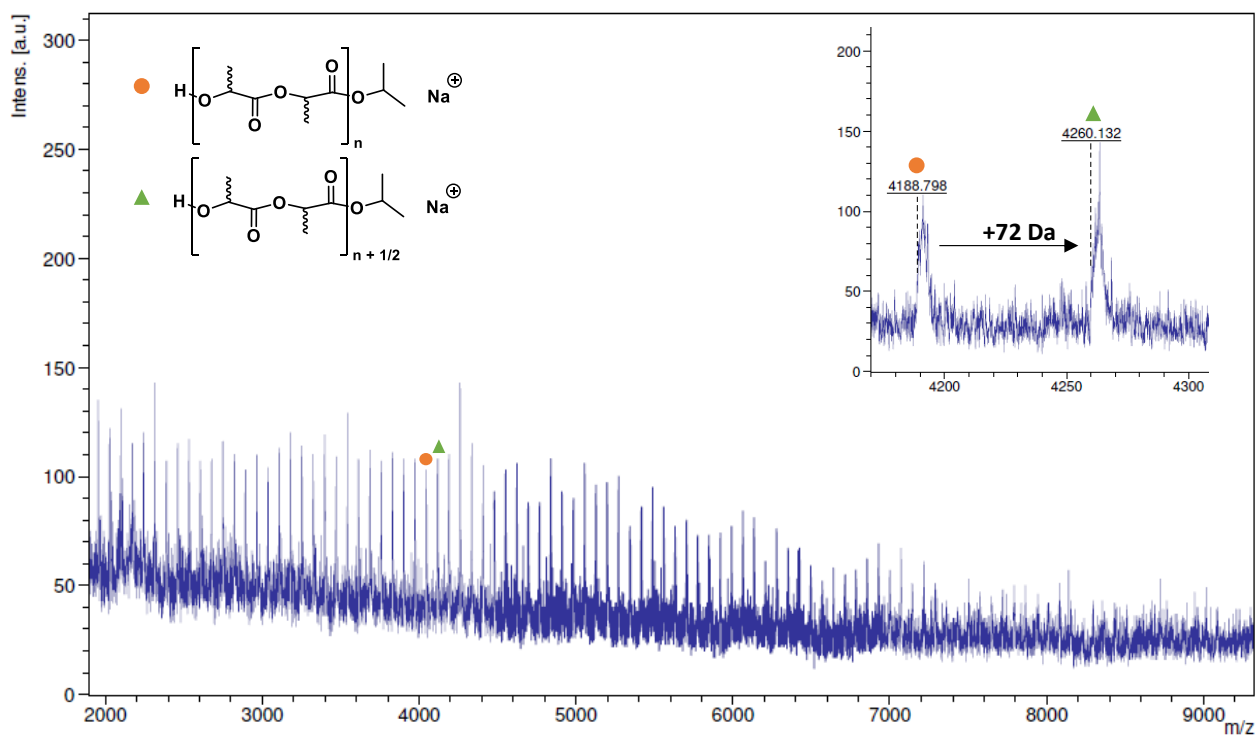

Figure S120 MALDI-ToF spectrum of PLA produced using **6d** with *i*PrOH as co-initiator (30 °C, 2 h, 100% conv., 25:1:1). Magnified version is provided to assist in identifying the repeat unit.

**X-ray data for compounds**

**L1H, L3H, L4H, L5H, 1a, 1b, 1b', 2b,  
3b, 1c, 5c, 6c, 1d, 2d, 3d, 4d, 6d**

## Crystal Data and Experimental

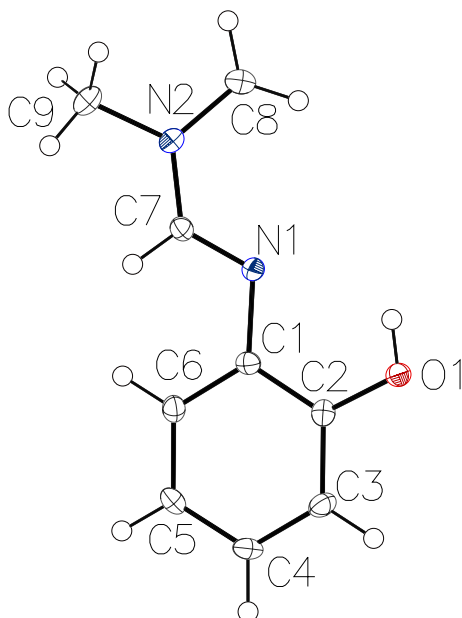

**Figure S121:** ORTEP view of compound **L1H**.

**Experimental.** Single clear light colourless prism crystals of **compound L1H** recrystallized from DCM by slow evaporation. A suitable crystal with dimensions 0.69 x 0.09 x 0.08 mm<sup>3</sup> was selected and mounted on a MITIGEN holder oil on a Bruker D8 Venture (Cu) diffractometer. The crystal was kept at a steady  $T = 100.0(1)$  K during data collection. The structure was solved with the **ShelXT**<sup>1</sup> solution program using dual methods and by using **Olex2**<sup>2</sup> as the graphical interface. The model was refined with **ShelXL**<sup>3</sup> 2018/3 using full matrix least squares minimisation on  $F^2$ .

**Crystal Data.** C<sub>9</sub>H<sub>12</sub>N<sub>2</sub>O,  $M_r = 164.21$ , orthorhombic, *Fdd2* (No. 43),  $a = 21.7702(6)$  Å,  $b = 21.9570(6)$  Å,  $c = 7.2513(2)$  Å,  $\alpha = \beta = \gamma = 90^\circ$ ,  $V = 3466.18(17)$  Å<sup>3</sup>,  $T = 100.0(1)$  K,  $Z = 16$ ,  $Z' = 1$ ,  $\mu(\text{CuK}\alpha) = 0.677$ , 15105 reflections measured, 1510 unique ( $R_{\text{int}} = 0.0498$ ) which were used in all calculations. The final  $wR_2$  was 0.0794 (all data) and  $R_1$  was 0.0327 ( $I \geq 2 \sigma(I)$ ).

**Table S2: Experimental parameters**

| Compound                              | <b>L1H</b>                                      |
|---------------------------------------|-------------------------------------------------|
| CCDC                                  | <b>2182070</b>                                  |
| Formula                               | C <sub>9</sub> H <sub>12</sub> N <sub>2</sub> O |
| $D_{\text{calc.}} / \text{g cm}^{-3}$ | 1.259                                           |
| $\mu / \text{mm}^{-1}$                | 0.677                                           |
| Formula Weight                        | 164.21                                          |
| Colour                                | clear light colourless                          |
| Shape                                 | prism                                           |
| Size/mm <sup>3</sup>                  | 0.69x0.09x0.08                                  |
| $T/\text{K}$                          | 100.0(1)                                        |
| Crystal System                        | orthorhombic                                    |
| Flack Parameter                       | unknown                                         |
| Space Group                           | <i>Fdd2</i>                                     |
| $a/\text{Å}$                          | 21.7702(6)                                      |
| $b/\text{Å}$                          | 21.9570(6)                                      |
| $c/\text{Å}$                          | 7.2513(2)                                       |
| $\alpha/^\circ$                       | 90                                              |
| $\beta/^\circ$                        | 90                                              |
| $\gamma/^\circ$                       | 90                                              |
| $V/\text{Å}^3$                        | 3466.18(17)                                     |
| $Z$                                   | 16                                              |
| $Z'$                                  | 1                                               |
| Wavelength/Å                          | 1.54178                                         |
| Radiation type                        | CuK $\alpha$                                    |
| $\theta_{\text{min}}/^\circ$          | 5.724                                           |
| $\theta_{\text{max}}/^\circ$          | 66.855                                          |
| Measured Refl's.                      | 15105                                           |
| Indep't Refl's                        | 1510                                            |
| Refl's $I \geq 2 \sigma(I)$           | 1429                                            |
| $R_{\text{int}}$                      | 0.0498                                          |
| Parameters                            | 112                                             |
| Restraints                            | 1                                               |
| Largest Peak                          | 0.138                                           |
| Deepest Hole                          | -0.187                                          |
| GooF                                  | 1.072                                           |
| $wR_2$ (all data)                     | 0.0794                                          |
| $wR_2$                                | 0.0778                                          |
| $R_1$ (all data)                      | 0.0354                                          |
| $R_1$                                 | 0.0327                                          |



**Table S3: Structure Quality Indicators**

|                     |            |       |             |      |          |       |          |       |
|---------------------|------------|-------|-------------|------|----------|-------|----------|-------|
| <b>Reflections:</b> | d min (Cu) | 0.84  | $\ I/I_0\ $ | 38.0 | Rint     | 4.98% | complete | 98%   |
| <b>Refinement:</b>  | Shift      | 0.000 | Max Peak    | 0.1  | Min Peak | -0.2  | Goof     | 1.072 |

A clear light colourless prism-shaped crystal with dimensions 0.69 x 0.09 x 0.08 mm<sup>3</sup> was mounted on a MITIGEN holder oil. Data were collected using a Bruker D8 Venture (Cu) diffractometer equipped with an Oxford Cryosystems low-temperature device operating at  $T = 100.0(1)$  K. Data were measured using  $\phi$  and  $\omega$  scans using CuK $\alpha$  radiation. The maximum resolution that was achieved was  $\theta = 66.855^\circ$  (0.84 Å). The unit cell was refined using **SAINT**<sup>4</sup> on 9915 reflections, 66% of the observed reflections. Data reduction, scaling and absorption corrections were performed using **SAINT**<sup>4</sup>. The final completeness is 99.90 % out to 66.855° in  $\theta$ . A multi-scan absorption correction was performed using **SADABS-2016/2**<sup>5</sup> was used for absorption correction.  $wR_2(\text{int})$  was 0.0868 before and 0.0704 after correction. The Ratio of minimum to maximum transmission is 0.8195. The absorption coefficient  $\mu$  of this material is 0.677 mm<sup>-1</sup> at this wavelength ( $\lambda = 1.54178\text{Å}$ ) and the minimum and maximum transmissions are 0.739 and 0.902. The structure was solved and the space group *Fdd2* (# 43) determined by the **ShelXT**<sup>1</sup> structure solution program using dual methods and refined by full matrix least squares minimisation on  $F^2$  using version 2018/3 of **ShelXL**<sup>3</sup>. All non-hydrogen atoms were refined anisotropically. Hydrogen atom positions were calculated geometrically and refined using the riding model. There is a single molecule in the asymmetric unit, which is represented by the reported sum formula. In other words: Z is 16 and Z' is 1.

**Table S4: Bond Lengths in Å for compound L1H.**

| Atom | Atom | Length/Å | Atom | Atom | Length/Å |
|------|------|----------|------|------|----------|
| O1   | C2   | 1.362(3) | C1   | C2   | 1.405(3) |
| N1   | C1   | 1.416(3) | C1   | C6   | 1.399(3) |
| N1   | C7   | 1.290(3) | C2   | C3   | 1.390(3) |
| N2   | C7   | 1.335(3) | C3   | C4   | 1.383(3) |
| N2   | C8   | 1.448(3) | C4   | C5   | 1.384(3) |
| N2   | C9   | 1.452(3) | C5   | C6   | 1.389(3) |

**Table S5: Bond Angles in ° for compound L1H.**

| Atom | Atom | Atom | Angle/°    | Atom | Atom | Atom | Angle/°    |
|------|------|------|------------|------|------|------|------------|
| C7   | N1   | C1   | 116.17(18) | O1   | C2   | C3   | 117.41(19) |
| C7   | N2   | C8   | 121.2(2)   | C3   | C2   | C1   | 119.88(19) |
| C7   | N2   | C9   | 121.0(2)   | C4   | C3   | C2   | 120.8(2)   |
| C8   | N2   | C9   | 117.4(2)   | C3   | C4   | C5   | 120.1(2)   |
| C2   | C1   | N1   | 118.43(18) | C4   | C5   | C6   | 119.5(2)   |
| C6   | C1   | N1   | 123.19(19) | C5   | C6   | C1   | 121.4(2)   |
| C6   | C1   | C2   | 118.3(2)   | N1   | C7   | N2   | 124.7(2)   |
| O1   | C2   | C1   | 122.7(2)   |      |      |      |            |

**Table S6: Torsion Angles in ° for compound L1H.**

| Atom | Atom | Atom | Atom | Angle/°   |
|------|------|------|------|-----------|
| O1   | C2   | C3   | C4   | 178.5(2)  |
| N1   | C1   | C2   | O1   | 4.1(3)    |
| N1   | C1   | C2   | C3   | -176.6(2) |
| N1   | C1   | C6   | C5   | 177.1(2)  |
| C1   | N1   | C7   | N2   | -174.9(2) |

| Atom | Atom | Atom | Atom | Angle/°   |
|------|------|------|------|-----------|
| C1   | C2   | C3   | C4   | -0.9(3)   |
| C2   | C1   | C6   | C5   | 0.2(3)    |
| C2   | C3   | C4   | C5   | 0.5(4)    |
| C3   | C4   | C5   | C6   | 0.3(4)    |
| C4   | C5   | C6   | C1   | -0.6(4)   |
| C6   | C1   | C2   | O1   | -178.8(2) |
| C6   | C1   | C2   | C3   | 0.5(3)    |
| C7   | N1   | C1   | C2   | -143.1(2) |
| C7   | N1   | C1   | C6   | 40.0(3)   |
| C8   | N2   | C7   | N1   | 5.0(3)    |
| C9   | N2   | C7   | N1   | 177.5(2)  |

**Table S7:** Hydrogen Bond information for **compound L1H**.

| D  | H  | A               | d(D-H)/Å | d(H-A)/Å | d(D-A)/Å | D-H-A/deg |
|----|----|-----------------|----------|----------|----------|-----------|
| O1 | H1 | N1 <sup>1</sup> | 0.84     | 2.07     | 2.837(2) | 151.9     |

-----  
<sup>1</sup>1/2-x,3/2-y,+z

## Crystal Data and Experimental

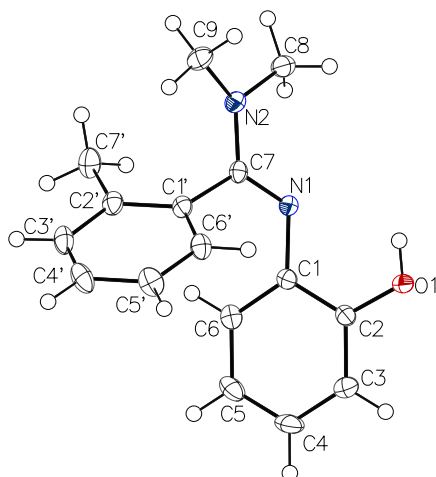

**Figure S122:** ORTEP view of compound **L3H**

**Experimental.** Single clear light colourless block-shaped crystals of **compound L3H** recrystallised from a mixture of DCM and pentane by slow evaporation. A suitable crystal with dimensions 0.33 x 0.25 x 0.19 mm<sup>3</sup> was selected and mounted on a MITIGEN holder oil on a Nonius APEX-II CCD diffractometer. The crystal was kept at a steady  $T = 110.0(1)$  K during data collection. The structure was solved with the **ShelXT**<sup>1</sup> 2018/2 solution program using dual methods and by using **Olex2**<sup>2</sup> 1.5 as the graphical interface. The model was refined with **ShelXL**<sup>3</sup> 2018/3 using full matrix least squares minimisation on  $F^2$ .

**Crystal Data.** C<sub>16</sub>H<sub>18</sub>N<sub>2</sub>O,  $M_r = 254.32$ , orthorhombic, *Pccn* (No. 56),  $a = 16.7113(6)$  Å,  $b = 10.8251(4)$  Å,  $c = 15.6437(6)$  Å,  $\alpha = \beta = \gamma = 90^\circ$ ,  $V = 2829.97(18)$  Å<sup>3</sup>,  $T = 110.0(1)$  K,  $Z = 8$ ,  $Z' = 1$ ,  $\mu(\text{Mo } K_{\alpha 1}) = 0.075$ , 50670 reflections measured, 3246 unique ( $R_{\text{int}} = 0.0548$ ) which were used in all calculations. The final  $wR_2$  was 0.1016 (all data) and  $R_1$  was 0.0396 ( $I \geq 2 \sigma(I)$ ).

**Table S8: Experimental parameters**

| Compound                              | <b>L3H</b>                                       |
|---------------------------------------|--------------------------------------------------|
| <b>CCDC</b>                           | <b>2182071</b>                                   |
| Formula                               | C <sub>16</sub> H <sub>18</sub> N <sub>2</sub> O |
| $D_{\text{calc.}} / \text{g cm}^{-3}$ | 1.194                                            |
| $\mu / \text{mm}^{-1}$                | 0.075                                            |
| Formula Weight                        | 254.32                                           |
| Colour                                | clear light colourless                           |
| Shape                                 | block-shaped                                     |
| Size/mm <sup>3</sup>                  | 0.33x0.25x0.19                                   |
| $T/\text{K}$                          | 110.0(1)                                         |
| Crystal System                        | orthorhombic                                     |
| Space Group                           | <i>Pccn</i>                                      |
| $a/\text{Å}$                          | 16.7113(6)                                       |
| $b/\text{Å}$                          | 10.8251(4)                                       |
| $c/\text{Å}$                          | 15.6437(6)                                       |
| $\alpha/^\circ$                       | 90                                               |
| $\beta/^\circ$                        | 90                                               |
| $\gamma/^\circ$                       | 90                                               |
| $V/\text{Å}^3$                        | 2829.97(18)                                      |
| $Z$                                   | 8                                                |
| $Z'$                                  | 1                                                |
| Wavelength/Å                          | 0.71073                                          |
| Radiation type                        | Mo $K_{\alpha 1}$                                |
| $\theta_{\text{min}}/^\circ$          | 2.592                                            |
| $\theta_{\text{max}}/^\circ$          | 27.511                                           |
| Measured Refl's.                      | 50670                                            |
| Indep't Refl's                        | 3246                                             |
| Refl's $I \geq 2 \sigma(I)$           | 2378                                             |
| $R_{\text{int}}$                      | 0.0548                                           |
| Parameters                            | 176                                              |
| Restraints                            | 0                                                |
| Largest Peak                          | 0.242                                            |
| Deepest Hole                          | -0.242                                           |
| GooF                                  | 1.056                                            |
| $wR_2$ (all data)                     | 0.1016                                           |
| $wR_2$                                | 0.0867                                           |
| $R_1$ (all data)                      | 0.0662                                           |
| $R_1$                                 | 0.0396                                           |

**Table S9: Structure Quality Indicators**

|                     |                                 |       |                 |      |          |       |            |       |
|---------------------|---------------------------------|-------|-----------------|------|----------|-------|------------|-------|
| <b>Reflections:</b> | d min (Mo)<br>2 $\theta$ =55.0° | 0.77  | I/ $\sigma$ (I) | 37.9 | Rint     | 5.48% | Full 50.5° | 99.9  |
| <b>Refinement:</b>  | Shift                           | 0.000 | Max Peak        | 0.2  | Min Peak | -0.2  | Goof       | 1.056 |

A clear light colourless block-shaped crystal with dimensions 0.33 x 0.25 x 0.19 mm<sup>3</sup> was mounted on a MITIGEN holder oil. Data were collected using a Nonius APEX-II CCD diffractometer equipped with an Oxford Cryosystems low-temperature device operating at  $T = 110.0(1)$  K. Data were measured using  $\phi$  and  $\omega$  scans with Mo K $\alpha_1$  radiation. The diffraction pattern was indexed and the total number of runs, and images was based on the strategy calculation from the program **APEX4**<sup>6</sup>. The maximum resolution that was achieved was  $\theta = 27.511^\circ$  (0.77 Å). The unit cell was refined using **SAINT V8.40B**<sup>4</sup> on 8989 reflections, 18% of the observed reflections. Data reduction, scaling and absorption corrections were performed using **SAINT V8.40B**<sup>4</sup>. The final completeness is 99.90 % out to 27.511° in  $\theta$ . **SADABS-2016/2**<sup>5</sup> was used for absorption correction.  $wR_2(\text{int})$  was 0.0568 before and 0.0538 after correction. The Ratio of minimum to maximum transmission is 0.9385. The absorption coefficient  $\mu$  of this material is 0.075 mm<sup>-1</sup> at this wavelength ( $\lambda = 0.71073$ Å) and the minimum and maximum transmissions are 0.911 and 0.971. The structure was solved and the space group *Pccn* (# 56) determined by the **ShelXT<sup>1</sup> 2018/2** structure solution program using dual methods and refined by full matrix least squares minimisation on  $F^2$  using version 2018/3 of **ShelXL<sup>3</sup> 2018/3**. All non-hydrogen atoms were refined anisotropically. Hydrogen atom positions were calculated geometrically and refined using the riding model. There is a single molecule in the asymmetric unit, which is represented by the reported sum formula. In other words: Z is 8 and Z' is 1.

**Table S10: Bond Lengths in Å for compound L3H.**

| Atom | Atom | Length/Å   | Atom | Atom | Length/Å   |
|------|------|------------|------|------|------------|
| O1   | C2   | 1.3613(16) | C1'  | C2'  | 1.4034(19) |
| N1   | C7   | 1.3039(16) | C1'  | C6'  | 1.396(2)   |
| N1   | C1   | 1.4212(16) | C6   | C5   | 1.386(2)   |
| N2   | C7   | 1.3559(17) | C2'  | C3'  | 1.399(2)   |
| N2   | C9   | 1.4585(17) | C2'  | C7'  | 1.507(2)   |
| N2   | C8   | 1.4531(18) | C3   | C4   | 1.385(2)   |
| C7   | C1'  | 1.5012(18) | C6'  | C5'  | 1.383(2)   |
| C1   | C2   | 1.4054(18) | C3'  | C4'  | 1.380(2)   |
| C1   | C6   | 1.3963(19) | C5   | C4   | 1.386(2)   |
| C2   | C3   | 1.3897(19) | C4'  | C5'  | 1.385(2)   |

**Table S11: Bond Angles in ° for compound L3H.**

| Atom | Atom | Atom | Angle/°    | Atom | Atom | Atom | Angle/°    |
|------|------|------|------------|------|------|------|------------|
| C7   | N1   | C1   | 119.56(11) | C2'  | C1'  | C7   | 121.14(12) |
| C7   | N2   | C9   | 122.91(12) | C6'  | C1'  | C7   | 118.52(12) |
| C7   | N2   | C8   | 119.49(11) | C6'  | C1'  | C2'  | 120.22(13) |
| C8   | N2   | C9   | 115.44(12) | C5   | C6   | C1   | 121.46(13) |
| N1   | C7   | N2   | 119.70(12) | C1'  | C2'  | C7'  | 122.68(13) |
| N1   | C7   | C1'  | 123.17(12) | C3'  | C2'  | C1'  | 118.02(13) |
| N2   | C7   | C1'  | 117.13(11) | C3'  | C2'  | C7'  | 119.29(13) |
| C2   | C1   | N1   | 118.13(12) | C4   | C3   | C2   | 120.54(13) |
| C6   | C1   | N1   | 123.60(12) | C5'  | C6'  | C1'  | 120.59(13) |
| C6   | C1   | C2   | 118.22(12) | C4'  | C3'  | C2'  | 121.30(13) |
| O1   | C2   | C1   | 123.09(12) | C6   | C5   | C4   | 119.57(13) |
| O1   | C2   | C3   | 116.77(12) | C3   | C4   | C5   | 120.02(13) |
| C3   | C2   | C1   | 120.12(12) | C3'  | C4'  | C5'  | 120.32(14) |

| Atom | Atom | Atom | Angle/°    |
|------|------|------|------------|
| C6'  | C5'  | C4'  | 119.52(14) |

**Table S12:** Torsion Angles in ° for **compound L3H**.

| Atom | Atom | Atom | Atom | Angle/°     |
|------|------|------|------|-------------|
| O1   | C2   | C3   | C4   | 179.27(13)  |
| N1   | C7   | C1'  | C2'  | -116.88(15) |
| N1   | C7   | C1'  | C6'  | 59.25(18)   |
| N1   | C1   | C2   | O1   | 1.66(19)    |
| N1   | C1   | C2   | C3   | 179.63(12)  |
| N1   | C1   | C6   | C5   | 179.57(13)  |
| N2   | C7   | C1'  | C2'  | 62.65(17)   |
| N2   | C7   | C1'  | C6'  | -121.21(13) |
| C7   | N1   | C1   | C2   | -128.40(13) |
| C7   | N1   | C1   | C6   | 54.23(18)   |
| C7   | C1'  | C2'  | C3'  | 176.65(12)  |
| C7   | C1'  | C2'  | C7'  | -2.1(2)     |
| C7   | C1'  | C6'  | C5'  | -177.52(13) |
| C1   | N1   | C7   | N2   | -171.60(11) |
| C1   | N1   | C7   | C1'  | 7.93(19)    |
| C1   | C2   | C3   | C4   | 1.2(2)      |
| C1   | C6   | C5   | C4   | 0.2(2)      |
| C2   | C1   | C6   | C5   | 2.2(2)      |
| C2   | C3   | C4   | C5   | 1.3(2)      |
| C1'  | C2'  | C3'  | C4'  | 0.9(2)      |
| C1'  | C6'  | C5'  | C4'  | 0.6(2)      |
| C6   | C1   | C2   | O1   | 179.17(12)  |
| C6   | C1   | C2   | C3   | -2.86(19)   |
| C6   | C5   | C4   | C3   | -1.9(2)     |
| C2'  | C1'  | C6'  | C5'  | -1.4(2)     |
| C2'  | C3'  | C4'  | C5'  | -1.7(2)     |
| C6'  | C1'  | C2'  | C3'  | 0.58(19)    |
| C6'  | C1'  | C2'  | C7'  | -178.12(13) |
| C3'  | C4'  | C5'  | C6'  | 0.9(2)      |
| C9   | N2   | C7   | N1   | -155.50(13) |
| C9   | N2   | C7   | C1'  | 24.95(18)   |
| C7'  | C2'  | C3'  | C4'  | 179.70(13)  |
| C8   | N2   | C7   | N1   | 7.04(19)    |
| C8   | N2   | C7   | C1'  | -172.51(12) |

**Table S13:** Hydrogen Bond information for **compound L3H**.

| D  | H  | A               | d(D-H)/Å | d(H-A)/Å | d(D-A)/Å   | D-H-A/deg |
|----|----|-----------------|----------|----------|------------|-----------|
| O1 | H1 | N1 <sup>1</sup> | 0.84     | 2.01     | 2.7509(14) | 146.5     |

-----  
<sup>1</sup>3/2-x,3/2-y,+z

## Crystal Data and Experimental

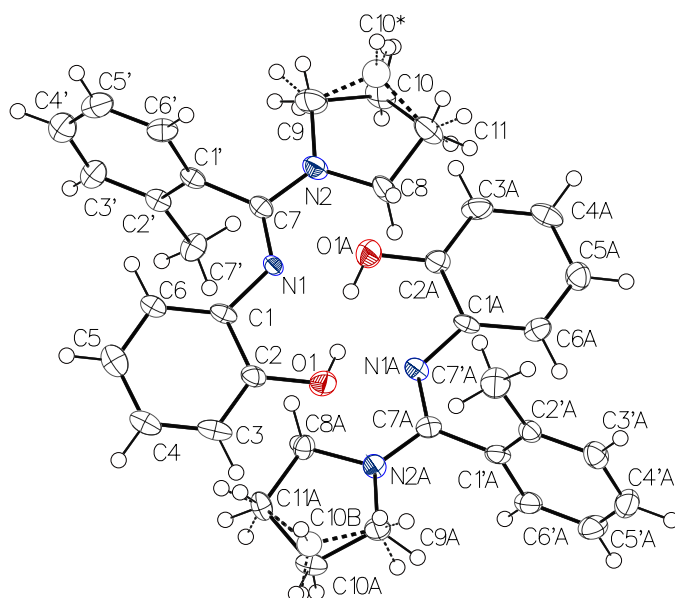

**Figure S123:** ORTEP view of compound **L4H**

**Experimental.** Single clear light colourless block-shaped crystals of **compound L4H** recrystallised from a mixture of DCM and pentane by slow evaporation. A suitable crystal with dimensions 0.66 x 0.56 x 0.47 mm<sup>3</sup> was selected and mounted on a MITIGEN holder oil on a Nonius APEX-II CCD diffractometer. The crystal was kept at a steady  $T = 110.0(1)$  K during data collection. The structure was solved with the **ShelXT<sup>1</sup>** solution program using dual methods and by using **Olex2<sup>2</sup>** 1.5 as the graphical interface. The model was refined with **ShelXL<sup>3</sup>** 2018/3 using full matrix least squares minimisation on  **$F^2$** .

**Crystal Data.** C<sub>18</sub>H<sub>20</sub>N<sub>2</sub>O,  $M_r = 280.36$ , orthorhombic, *Pna*2<sub>1</sub> (No. 33),  $a = 19.8302(12)$  Å,  $b = 8.1178(5)$  Å,  $c = 18.3922(12)$  Å,  $\alpha = \beta = \gamma = 90^\circ$ ,  $V = 2960.7(3)$  Å<sup>3</sup>,  $T = 110.0(1)$  K,  $Z = 8$ ,  $Z' = 2$ ,  $\mu(\text{Mo } K_{\alpha 1}) = 0.079$ , 68139 reflections measured, 5224 unique ( $R_{\text{int}} = 0.0728$ ) which were used in all calculations. The final  $wR_2$  was 0.2340 (all data) and  $R_1$  was 0.0868 ( $I \geq 2 \sigma(I)$ ).

**Table S14:** Experimental parameters

| Compound                              | <b>L4H</b>                                       |
|---------------------------------------|--------------------------------------------------|
| CCDC                                  | <b>2182072</b>                                   |
| Formula                               | C <sub>18</sub> H <sub>20</sub> N <sub>2</sub> O |
| $D_{\text{calc.}} / \text{g cm}^{-3}$ | 1.258                                            |
| $\mu / \text{mm}^{-1}$                | 0.079                                            |
| Formula Weight                        | 280.36                                           |
| Colour                                | clear light colourless                           |
| Shape                                 | block-shaped                                     |
| Size/mm <sup>3</sup>                  | 0.66x0.56x0.47                                   |
| $T/\text{K}$                          | 110.0(1)                                         |
| Crystal System                        | orthorhombic                                     |
| Flack Parameter                       | 1(4)                                             |
| Hooft Parameter                       | -0.2(7)                                          |
| Space Group                           | <i>Pna</i> 2 <sub>1</sub>                        |
| $a/\text{\AA}$                        | 19.8302(12)                                      |
| $b/\text{\AA}$                        | 8.1178(5)                                        |
| $c/\text{\AA}$                        | 18.3922(12)                                      |
| $\alpha/^\circ$                       | 90                                               |
| $\beta/^\circ$                        | 90                                               |
| $\gamma/^\circ$                       | 90                                               |
| $V/\text{\AA}^3$                      | 2960.7(3)                                        |
| $Z$                                   | 8                                                |
| $Z'$                                  | 2                                                |
| Wavelength/Å                          | 0.71073                                          |
| Radiation type                        | Mo $K_{\alpha 1}$                                |
| $\theta_{\text{min}}/^\circ$          | 2.054                                            |
| $\theta_{\text{max}}/^\circ$          | 24.998                                           |
| Measured Refl's.                      | 68139                                            |
| Indep't Refl's                        | 5224                                             |
| Refl's $I \geq 2 \sigma(I)$           | 4631                                             |
| $R_{\text{int}}$                      | 0.0728                                           |
| Parameters                            | 394                                              |
| Restraints                            | 1                                                |
| Largest Peak                          | 0.743                                            |
| Deepest Hole                          | -0.410                                           |
| GooF                                  | 1.192                                            |
| $wR_2$ (all data)                     | 0.2340                                           |
| $wR_2$                                | 0.2210                                           |
| $R_1$ (all data)                      | 0.0971                                           |
| $R_1$                                 | 0.0868                                           |

**Table S15: Structure Quality Indicators**

|                     |                                 |       |                 |      |          |       |            |       |
|---------------------|---------------------------------|-------|-----------------|------|----------|-------|------------|-------|
| <b>Reflections:</b> | d min (Mo)<br>2 $\theta$ =50.0° | 0.84  | I/ $\sigma$ (I) | 25.9 | Rint     | 7.28% | Full 50.0° | 99.9  |
| <b>Refinement:</b>  | Shift                           | 0.000 | Max Peak        | 0.7  | Min Peak | -0.4  | Goof       | 1.192 |

A clear light colourless block-shaped crystal with dimensions 0.66 x 0.56 x 0.47 mm<sup>3</sup> was mounted on a MITIGEN holder oil. Data were collected using a Nonius APEX-II CCD diffractometer equipped with an Oxford Cryosystems low-temperature device operating at  $T = 110.0(1)$  K. Data were measured using  $\phi$  and  $\omega$  scans with Mo  $K_{\alpha 1}$  radiation. The diffraction pattern was indexed and the total number of runs, and images was based on the strategy calculation from the program **APEX4**<sup>6</sup>. The maximum resolution that was achieved was  $\theta = 24.998^\circ$  (0.84 Å). The unit cell was refined using **SAINT V8.40B**<sup>4</sup> on 9903 reflections, 15% of the observed reflections. Data reduction, scaling and absorption corrections were performed using **SAINT V8.40B**<sup>4</sup>. The final completeness is 99.90 % out to 24.998° in  $\theta$ . **SADABS-2016/2**<sup>5</sup> (Bruker, 2016/2) was used for absorption correction.  $wR_2(\text{int})$  was 0.1013 before and 0.0904 after correction. The Ratio of minimum to maximum transmission is 0.8389. The absorption coefficient  $\mu$  of this material is 0.079 mm<sup>-1</sup> at this wavelength ( $\lambda = 0.71073\text{Å}$ ) and the minimum and maximum transmissions are 0.804 and 0.958. The structure was solved and the space group  $Pna2_1$  (# 33) determined by the **ShelXT**<sup>1</sup> structure solution program using dual methods and refined by full matrix least squares minimisation on  $F^2$  using version 2018/3 of **ShelXL**<sup>3</sup> 2018/3. All non-hydrogen atoms were refined anisotropically, excepted minor disordered part on each pyrrolidine (**Table**). Hydrogen atom positions were calculated geometrically and refined using the riding model.

**Table S16: Bond Lengths in Å for compound L4H.**

| Atom | Atom | Length/Å  | Atom | Atom | Length/Å  |
|------|------|-----------|------|------|-----------|
| O1   | C2   | 1.372(8)  | O1A  | C2A  | 1.360(8)  |
| N1   | C1   | 1.426(8)  | N1A  | C1A  | 1.395(8)  |
| N1   | C7   | 1.293(9)  | N1A  | C7A  | 1.316(8)  |
| N2   | C7   | 1.348(8)  | N2A  | C7A  | 1.348(8)  |
| N2   | C8   | 1.433(9)  | N2A  | C8A  | 1.459(8)  |
| N2   | C9   | 1.469(9)  | N2A  | C9A  | 1.480(9)  |
| C1   | C2   | 1.401(9)  | C1'A | C2'A | 1.376(9)  |
| C1   | C6   | 1.388(9)  | C1'A | C6'A | 1.395(9)  |
| C1'  | C2'  | 1.417(8)  | C1'A | C7A  | 1.500(9)  |
| C1'  | C6'  | 1.402(9)  | C1A  | C2A  | 1.407(9)  |
| C1'  | C7   | 1.489(9)  | C1A  | C6A  | 1.400(9)  |
| C2   | C3   | 1.377(10) | C2'A | C3'A | 1.396(9)  |
| C2'  | C3'  | 1.388(9)  | C2'A | C7'A | 1.498(10) |
| C2'  | C7'  | 1.488(9)  | C2A  | C3A  | 1.393(11) |
| C3   | C4   | 1.369(11) | C3'A | C4'A | 1.396(10) |
| C3'  | C4'  | 1.396(10) | C3A  | C4A  | 1.368(11) |
| C4   | C5   | 1.393(11) | C4'A | C5'A | 1.372(10) |
| C4'  | C5'  | 1.394(10) | C4A  | C5A  | 1.389(10) |
| C5   | C6   | 1.393(9)  | C5'A | C6'A | 1.380(10) |
| C5'  | C6'  | 1.387(10) | C5A  | C6A  | 1.396(10) |
| C8   | C11  | 1.537(10) | C8A  | C11A | 1.527(10) |
| C9   | C10  | 1.494(12) | C9A  | C10A | 1.505(12) |
| C9   | C10* | 1.39(4)   | C9A  | C10B | 1.42(3)   |
| C10  | C11  | 1.517(12) | C10A | C11A | 1.512(11) |
| C10* | C11  | 1.52(4)   | C11A | C10B | 1.52(3)   |

**Table S17:** Bond Angles in ° for **compound L4H**.

| Atom | Atom | Atom | Angle/°   | Atom | Atom | Atom | Angle/°   |
|------|------|------|-----------|------|------|------|-----------|
| C7   | N1   | C1   | 126.5(5)  | C7A  | N1A  | C1A  | 125.1(5)  |
| C7   | N2   | C8   | 122.4(6)  | C7A  | N2A  | C8A  | 122.9(5)  |
| C7   | N2   | C9   | 125.3(6)  | C7A  | N2A  | C9A  | 125.1(5)  |
| C8   | N2   | C9   | 112.3(6)  | C8A  | N2A  | C9A  | 111.7(5)  |
| C2   | C1   | N1   | 111.8(5)  | C2'A | C1'A | C6'A | 121.5(6)  |
| C6   | C1   | N1   | 129.9(6)  | C2'A | C1'A | C7A  | 120.4(6)  |
| C6   | C1   | C2   | 118.2(6)  | C6'A | C1'A | C7A  | 118.2(6)  |
| C2'  | C1'  | C7   | 119.5(5)  | N1A  | C1A  | C2A  | 111.2(5)  |
| C6'  | C1'  | C2'  | 120.5(6)  | N1A  | C1A  | C6A  | 132.6(6)  |
| C6'  | C1'  | C7   | 120.0(5)  | C6A  | C1A  | C2A  | 116.2(6)  |
| O1   | C2   | C1   | 118.2(6)  | C1'A | C2'A | C3'A | 117.9(6)  |
| O1   | C2   | C3   | 120.2(6)  | C1'A | C2'A | C7'A | 121.5(6)  |
| C3   | C2   | C1   | 121.6(6)  | C3'A | C2'A | C7'A | 120.6(6)  |
| C1'  | C2'  | C7'  | 119.6(6)  | O1A  | C2A  | C1A  | 117.9(6)  |
| C3'  | C2'  | C1'  | 118.2(6)  | O1A  | C2A  | C3A  | 120.2(6)  |
| C3'  | C2'  | C7'  | 122.1(6)  | C3A  | C2A  | C1A  | 121.8(6)  |
| C4   | C3   | C2   | 120.0(7)  | C4'A | C3'A | C2'A | 120.8(6)  |
| C2'  | C3'  | C4'  | 121.4(6)  | C4A  | C3A  | C2A  | 120.2(6)  |
| C3   | C4   | C5   | 119.6(7)  | C5'A | C4'A | C3'A | 120.2(6)  |
| C5'  | C4'  | C3'  | 119.9(7)  | C3A  | C4A  | C5A  | 120.1(7)  |
| C4   | C5   | C6   | 120.7(6)  | C4'A | C5'A | C6'A | 119.7(6)  |
| C6'  | C5'  | C4'  | 120.1(6)  | C4A  | C5A  | C6A  | 119.3(6)  |
| C1   | C6   | C5   | 119.9(6)  | C5'A | C6'A | C1'A | 119.8(6)  |
| C5'  | C6'  | C1'  | 119.9(6)  | C5A  | C6A  | C1A  | 122.3(6)  |
| N1   | C7   | N2   | 117.9(6)  | N1A  | C7A  | N2A  | 117.6(6)  |
| N1   | C7   | C1'  | 126.8(6)  | N1A  | C7A  | C1'A | 126.2(6)  |
| N2   | C7   | C1'  | 115.4(6)  | N2A  | C7A  | C1'A | 116.2(5)  |
| N2   | C8   | C11  | 104.6(6)  | N2A  | C8A  | C11A | 103.8(5)  |
| N2   | C9   | C10  | 102.6(7)  | N2A  | C9A  | C10A | 102.5(6)  |
| C10* | C9   | N2   | 104.8(17) | C10B | C9A  | N2A  | 106.6(14) |
| C9   | C10  | C11  | 104.5(7)  | C9A  | C10A | C11A | 103.9(7)  |
| C9   | C10* | C11  | 110(3)    | C10A | C11A | C8A  | 105.9(6)  |
| C10  | C11  | C8   | 103.3(6)  | C10B | C11A | C8A  | 105.8(13) |
| C10* | C11  | C8   | 102.9(16) | C9A  | C10B | C11A | 108(2)    |

**Table S18:** Torsion Angles in ° for **compound L4H**.

| Atom | Atom | Atom | Atom | Angle/°   |
|------|------|------|------|-----------|
| O1   | C2   | C3   | C4   | -179.6(6) |
| N1   | C1   | C2   | O1   | -2.2(8)   |
| N1   | C1   | C2   | C3   | 179.8(6)  |
| N1   | C1   | C6   | C5   | -178.5(6) |
| N2   | C8   | C11  | C10  | -22.0(8)  |
| N2   | C8   | C11  | C10* | 12.3(19)  |
| N2   | C9   | C10  | C11  | -33.6(9)  |
| N2   | C9   | C10* | C11  | 24(3)     |
| C1   | N1   | C7   | N2   | 179.2(6)  |
| C1   | N1   | C7   | C1'  | -1.0(10)  |
| C1   | C2   | C3   | C4   | -1.6(10)  |
| C1'  | C2'  | C3'  | C4'  | -0.4(11)  |
| C2   | C1   | C6   | C5   | -1.4(9)   |
| C2   | C3   | C4   | C5   | 0.1(10)   |
| C2'  | C1'  | C6'  | C5'  | 0.9(10)   |
| C2'  | C1'  | C7   | N1   | -80.0(9)  |



| Atom | Atom | Atom | Atom | Angle/°   |
|------|------|------|------|-----------|
| C2'  | C1'  | C7   | N2   | 99.8(7)   |
| C2'  | C3'  | C4'  | C5'  | 1.3(11)   |
| C3   | C4   | C5   | C6   | 0.6(10)   |
| C3'  | C4'  | C5'  | C6'  | -1.1(11)  |
| C4   | C5   | C6   | C1   | 0.0(9)    |
| C4'  | C5'  | C6'  | C1'  | 0.0(11)   |
| C6   | C1   | C2   | O1   | -179.7(6) |
| C6   | C1   | C2   | C3   | 2.2(9)    |
| C6'  | C1'  | C2'  | C3'  | -0.7(10)  |
| C6'  | C1'  | C2'  | C7'  | 175.7(6)  |
| C6'  | C1'  | C7   | N1   | 98.1(8)   |
| C6'  | C1'  | C7   | N2   | -82.1(8)  |
| C7   | N1   | C1   | C2   | 169.7(6)  |
| C7   | N1   | C1   | C6   | -13.1(10) |
| C7   | N2   | C8   | C11  | 178.6(6)  |
| C7   | N2   | C9   | C10  | -156.9(7) |
| C7   | N2   | C9   | C10* | 167(2)    |
| C7   | C1'  | C2'  | C3'  | 177.5(6)  |
| C7   | C1'  | C2'  | C7'  | -6.2(10)  |
| C7   | C1'  | C6'  | C5'  | -177.2(6) |
| C7'  | C2'  | C3'  | C4'  | -176.7(6) |
| C8   | N2   | C7   | N1   | 0.8(9)    |
| C8   | N2   | C7   | C1'  | -179.0(6) |
| C8   | N2   | C9   | C10  | 20.4(9)   |
| C8   | N2   | C9   | C10* | -16(2)    |
| C9   | N2   | C7   | N1   | 177.9(6)  |
| C9   | N2   | C7   | C1'  | -1.9(9)   |
| C9   | N2   | C8   | C11  | 1.2(8)    |
| C9   | C10  | C11  | C8   | 34.7(9)   |
| C9   | C10* | C11  | C8   | -23(3)    |
| O1A  | C2A  | C3A  | C4A  | 176.4(6)  |
| N1A  | C1A  | C2A  | O1A  | 3.2(8)    |
| N1A  | C1A  | C2A  | C3A  | -178.2(6) |
| N1A  | C1A  | C6A  | C5A  | 179.1(6)  |
| N2A  | C8A  | C11A | C10A | -17.1(7)  |
| N2A  | C8A  | C11A | C10B | 15.9(15)  |
| N2A  | C9A  | C10A | C11A | -34.2(8)  |
| N2A  | C9A  | C10B | C11A | 19(2)     |
| C1'A | C2'A | C3'A | C4'A | -3.1(11)  |
| C1A  | N1A  | C7A  | N2A  | -178.2(5) |
| C1A  | N1A  | C7A  | C1'A | 1.8(10)   |
| C1A  | C2A  | C3A  | C4A  | -2.2(10)  |
| C2'A | C1'A | C6'A | C5'A | -1.4(10)  |
| C2'A | C1'A | C7A  | N1A  | 81.1(9)   |
| C2'A | C1'A | C7A  | N2A  | -98.9(7)  |
| C2'A | C3'A | C4'A | C5'A | 1.5(11)   |
| C2A  | C1A  | C6A  | C5A  | 2.2(9)    |
| C2A  | C3A  | C4A  | C5A  | 3.5(10)   |
| C3'A | C4'A | C5'A | C6'A | 0.3(11)   |
| C3A  | C4A  | C5A  | C6A  | -1.9(10)  |
| C4'A | C5'A | C6'A | C1'A | -0.4(10)  |
| C4A  | C5A  | C6A  | C1A  | -1.0(10)  |
| C6'A | C1'A | C2'A | C3'A | 3.1(10)   |
| C6'A | C1'A | C2'A | C7'A | -175.9(7) |
| C6'A | C1'A | C7A  | N1A  | -97.9(8)  |
| C6'A | C1'A | C7A  | N2A  | 82.1(8)   |
| C6A  | C1A  | C2A  | O1A  | -179.3(6) |
| C6A  | C1A  | C2A  | C3A  | -0.6(9)   |
| C7'A | C2'A | C3'A | C4'A | 175.8(7)  |
| C7A  | N1A  | C1A  | C2A  | -170.1(6) |

| Atom | Atom | Atom | Atom | Angle/°   |
|------|------|------|------|-----------|
| C7A  | N1A  | C1A  | C6A  | 12.9(10)  |
| C7A  | N2A  | C8A  | C11A | -179.6(6) |
| C7A  | N2A  | C9A  | C10A | -160.7(7) |
| C7A  | N2A  | C9A  | C10B | 165.7(16) |
| C7A  | C1'A | C2'A | C3'A | -175.9(6) |
| C7A  | C1'A | C2'A | C7'A | 5.2(10)   |
| C7A  | C1'A | C6'A | C5'A | 177.6(6)  |
| C8A  | N2A  | C7A  | N1A  | 0.8(9)    |
| C8A  | N2A  | C7A  | C1'A | -179.3(6) |
| C8A  | N2A  | C9A  | C10A | 24.8(8)   |
| C8A  | N2A  | C9A  | C10B | -8.8(17)  |
| C8A  | C11A | C10B | C9A  | -22(2)    |
| C9A  | N2A  | C7A  | N1A  | -173.1(6) |
| C9A  | N2A  | C7A  | C1'A | 6.9(9)    |
| C9A  | N2A  | C8A  | C11A | -5.0(7)   |
| C9A  | C10A | C11A | C8A  | 32.3(8)   |

**Table S19:** Hydrogen Bond information for **compound L4H**.

| D   | H   | A   | d(D-H)/Å | d(H-A)/Å | d(D-A)/Å | D-H-A/deg |
|-----|-----|-----|----------|----------|----------|-----------|
| O1  | H   | N1  | 0.84     | 2.11     | 2.581(7) | 115.0     |
| O1A | H1A | N1A | 0.84     | 2.06     | 2.552(8) | 116.9     |

**Table S20:** Atomic Occupancies for all atoms that are not fully occupied in **compound L4H**.

| Atom | Occupancy | Atom | Occupancy | Atom | Occupancy | Atom | Occupancy |
|------|-----------|------|-----------|------|-----------|------|-----------|
| HN   | 0.8       | C10* | 0.2       | H9AA | 0.81(8)   | H11A | 0.81(8)   |
| HO   | 0.8       | HT   | 0.2       | H9AB | 0.81(8)   | H11B | 0.81(8)   |
| HP   | 0.2       | HU   | 0.2       | H9AC | 0.19(8)   | H11C | 0.19(8)   |
| HQ   | 0.2       | HV   | 0.95(12)  | H9AD | 0.19(8)   | H11D | 0.19(8)   |
| C10  | 0.8       | HW   | 0.95(12)  | C10A | 0.77      | C10B | 0.23      |
| HR   | 0.8       | HX   | 0.05(12)  | H10A | 0.77      | H10C | 0.23      |
| HS   | 0.8       | HY   | 0.05(12)  | H10B | 0.77      | H10D | 0.23      |

# Compound L5H

$R_1=4.36\%$

## Crystal Data and Experimental

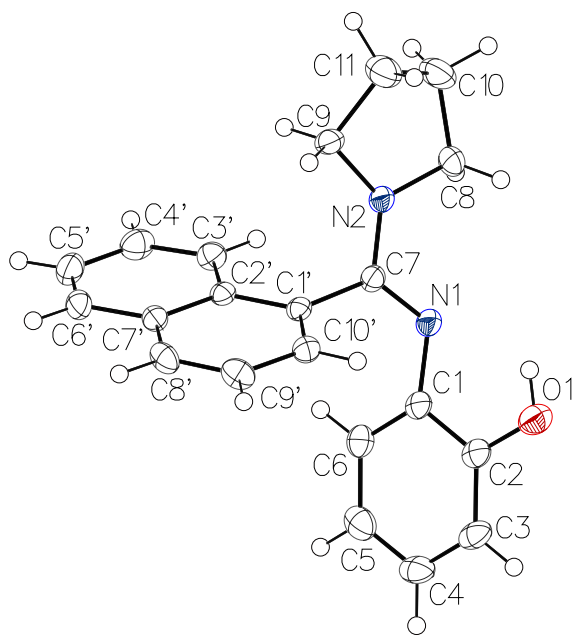

**Figure S124:** ORTEP view of compound **L5H**

**Experimental.** Single clear light colourless prism-shaped crystals of **compound L5H** recrystallised from a mixture of DCM and pentane by slow evaporation. A suitable crystal with dimensions  $0.87 \times 0.62 \times 0.53 \text{ mm}^3$  was selected and mounted on a glass fibre oil on a Nonius APEX-II CCD diffractometer. The crystal was kept at a steady  $T = 110.0(1) \text{ K}$  during data collection. The structure was solved with the **ShelXT**<sup>1</sup> 2018/2 solution program using dual methods and by using **Olex2**<sup>2</sup> 1.5 as the graphical interface. The model was refined with **ShelXL**<sup>3</sup> 2018/3 using full matrix least squares minimisation on  $F^2$ .

**Crystal Data.**  $\text{C}_{21}\text{H}_{20}\text{N}_2\text{O}$ ,  $M_r = 316.39$ , triclinic,  $P-1$  (No. 2),  $a = 8.7993(2) \text{ \AA}$ ,  $b = 9.5600(3) \text{ \AA}$ ,  $c = 11.0330(4) \text{ \AA}$ ,  $\alpha = 92.371(2)^\circ$ ,  $\beta = 100.401(2)^\circ$ ,  $\gamma = 114.782(2)^\circ$ ,  $V = 821.64(5) \text{ \AA}^3$ ,  $T = 110.0(1) \text{ K}$ ,  $Z = 2$ ,  $Z' = 1$ ,  $\mu(\text{Mo K}\alpha_1) = 0.079$ , 20523 reflections measured, 3792 unique ( $R_{\text{int}} = 0.0220$ ) which were used in all calculations. The final  $wR_2$  was 0.1193 (all data) and  $R_1$  was 0.0436 ( $I \geq 2 \sigma(I)$ ).

**Table S21: Experimental parameters**

| Compound                              | L5H                                            |
|---------------------------------------|------------------------------------------------|
| CCDC                                  | 2182073                                        |
| Formula                               | $\text{C}_{21}\text{H}_{20}\text{N}_2\text{O}$ |
| $D_{\text{calc.}} / \text{g cm}^{-3}$ | 1.279                                          |
| $\mu / \text{mm}^{-1}$                | 0.079                                          |
| Formula Weight                        | 316.39                                         |
| Colour                                | clear light colourless                         |
| Shape                                 | prism-shaped                                   |
| Size/ $\text{mm}^3$                   | $0.87 \times 0.62 \times 0.53$                 |
| $T / \text{K}$                        | 110.0(1)                                       |
| Crystal System                        | triclinic                                      |
| Space Group                           | $P-1$                                          |
| $a / \text{Å}$                        | 8.7993(2)                                      |
| $b / \text{Å}$                        | 9.5600(3)                                      |
| $c / \text{Å}$                        | 11.0330(4)                                     |
| $\alpha / ^\circ$                     | 92.371(2)                                      |
| $\beta / ^\circ$                      | 100.401(2)                                     |
| $\gamma / ^\circ$                     | 114.782(2)                                     |
| $V / \text{Å}^3$                      | 821.64(5)                                      |
| $Z$                                   | 2                                              |
| $Z'$                                  | 1                                              |
| Wavelength/ $\text{Å}$                | 0.71073                                        |
| Radiation type                        | Mo $\text{K}\alpha_1$                          |
| $\theta_{\text{min}} / ^\circ$        | 1.893                                          |
| $\theta_{\text{max}} / ^\circ$        | 27.532                                         |
| Measured Refl's.                      | 20523                                          |
| Indep't Refl's                        | 3792                                           |
| Refl's $I \geq 2 \sigma(I)$           | 3047                                           |
| $R_{\text{int}}$                      | 0.0220                                         |
| Parameters                            | 218                                            |
| Restraints                            | 0                                              |
| Largest Peak                          | 0.296                                          |
| Deepest Hole                          | -0.218                                         |
| GooF                                  | 1.055                                          |
| $wR_2$ (all data)                     | 0.1193                                         |
| $wR_2$                                | 0.1061                                         |
| $R_1$ (all data)                      | 0.0587                                         |
| $R_1$                                 | 0.0436                                         |

**Table S22: Structure Quality Indicators**

|                     |                                 |       |                 |      |          |       |            |       |
|---------------------|---------------------------------|-------|-----------------|------|----------|-------|------------|-------|
| <b>Reflections:</b> | d min (Mo)<br>2 $\theta$ =55.1° | 0.77  | I/ $\sigma$ (I) | 57.9 | Rint     | 2.20% | Full 50.5° | 100   |
| <b>Refinement:</b>  | Shift                           | 0.000 | Max Peak        | 0.3  | Min Peak | -0.2  | Goof       | 1.055 |

A clear light colourless prism-shaped crystal with dimensions 0.87 x 0.62 x 0.53 mm<sup>3</sup> was mounted on a glass fibre oil. Data were collected using a Nonius APEX-II CCD diffractometer equipped with an Oxford Cryosystems low-temperature device operating at  $T = 110.0(1)$  K. Data were measured using  $\phi$  and  $\omega$  scans with Mo K $\alpha_1$  radiation. The diffraction pattern was indexed and the total number of runs, and images was based on the strategy calculation from the program **APEX4**<sup>6</sup>. The maximum resolution that was achieved was  $\theta = 27.532^\circ$  (0.77 Å). The unit cell was refined using **SAINT V8.40B**<sup>4</sup> on 6361 reflections, 31% of the observed reflections. Data reduction, scaling and absorption corrections were performed using **SAINT V8.40B**<sup>4</sup>. The final completeness is 100.00 % out to 27.532° in  $\theta$ . **SADABS-2016/2**<sup>5</sup> was used for absorption correction.  $wR_2(\text{int})$  was 0.0529 before and 0.0389 after correction. The Ratio of minimum to maximum transmission is 0.8878. The absorption coefficient  $\mu$  of this material is 0.079 mm<sup>-1</sup> at this wavelength ( $\lambda = 0.71073\text{Å}$ ) and the minimum and maximum transmissions are 0.851 and 0.958. The structure was solved, and the space group  $P-1$  (# 2) determined by the **ShelXT**<sup>1</sup> **2018/2** structure solution program using dual methods and refined by full matrix least squares minimisation on  $F^2$  using version 2018/3 of **ShelXL**<sup>3</sup> **2018/3**. All non-hydrogen atoms were refined anisotropically. Hydrogen atom positions were calculated geometrically and refined using the riding model.

**Table S23: Bond Lengths in Å for compound L5H.**

| Atom | Atom | Length/Å   | Atom | Atom | Length/Å   |
|------|------|------------|------|------|------------|
| O1   | C2   | 1.3723(18) | C3   | C4   | 1.386(2)   |
| N1   | C1   | 1.4087(17) | C3'  | C4'  | 1.368(2)   |
| N1   | C7   | 1.2978(17) | C4   | C5   | 1.380(2)   |
| N2   | C7   | 1.3419(17) | C4'  | C5'  | 1.409(2)   |
| N2   | C8   | 1.4684(16) | C5   | C6   | 1.392(2)   |
| N2   | C9   | 1.4680(17) | C5'  | C6'  | 1.360(2)   |
| C1   | C2   | 1.399(2)   | C6'  | C7'  | 1.4165(19) |
| C1   | C6   | 1.390(2)   | C7'  | C8'  | 1.4101(19) |
| C1'  | C2'  | 1.4235(18) | C8   | C10  | 1.519(2)   |
| C1'  | C7   | 1.5013(17) | C8'  | C9'  | 1.360(2)   |
| C1'  | C10' | 1.3743(18) | C9   | C11  | 1.510(2)   |
| C2   | C3   | 1.383(2)   | C9'  | C10' | 1.4142(19) |
| C2'  | C3'  | 1.4180(18) | C10  | C11  | 1.519(2)   |
| C2'  | C7'  | 1.4224(17) |      |      |            |

**Table S24: Bond Angles in ° for compound L5H.**

| Atom | Atom | Atom | Angle/°    | Atom | Atom | Atom | Angle/°    |
|------|------|------|------------|------|------|------|------------|
| C7   | N1   | C1   | 120.92(11) | C3   | C2   | C1   | 121.34(14) |
| C7   | N2   | C8   | 121.89(11) | C3'  | C2'  | C1'  | 122.79(11) |
| C7   | N2   | C9   | 125.92(11) | C3'  | C2'  | C7'  | 118.57(12) |
| C9   | N2   | C8   | 111.90(11) | C7'  | C2'  | C1'  | 118.63(11) |
| C2   | C1   | N1   | 116.43(12) | C2   | C3   | C4   | 119.49(14) |
| C6   | C1   | N1   | 124.95(13) | C4'  | C3'  | C2'  | 120.58(13) |
| C6   | C1   | C2   | 118.30(13) | C5   | C4   | C3   | 120.09(14) |
| C2'  | C1'  | C7   | 121.17(11) | C3'  | C4'  | C5'  | 120.73(14) |
| C10' | C1'  | C2'  | 120.12(11) | C4   | C5   | C6   | 120.34(15) |
| C10' | C1'  | C7   | 118.66(11) | C6'  | C5'  | C4'  | 120.08(13) |
| O1   | C2   | C1   | 119.51(12) | C1   | C6   | C5   | 120.41(14) |
| O1   | C2   | C3   | 119.15(13) | C5'  | C6'  | C7'  | 120.93(13) |

| Atom | Atom | Atom | Angle/°    | Atom | Atom | Atom | Angle/°    |
|------|------|------|------------|------|------|------|------------|
| N1   | C7   | N2   | 118.95(12) | C9'  | C8'  | C7'  | 120.71(12) |
| N1   | C7   | C1'  | 125.09(12) | N2   | C9   | C11  | 102.83(11) |
| N2   | C7   | C1'  | 115.86(11) | C8'  | C9'  | C10' | 120.41(13) |
| C6'  | C7'  | C2'  | 119.12(13) | C11  | C10  | C8   | 104.44(12) |
| C8'  | C7'  | C2'  | 119.57(12) | C1'  | C10' | C9'  | 120.52(12) |
| C8'  | C7'  | C6'  | 121.29(12) | C9   | C11  | C10  | 103.21(13) |
| N2   | C8   | C10  | 103.47(11) |      |      |      |            |

**Table S25:** Torsion Angles in ° for **compound L5H**.

| Atom | Atom | Atom | Atom | Angle/°     |
|------|------|------|------|-------------|
| O1   | C2   | C3   | C4   | -178.30(12) |
| N1   | C1   | C2   | O1   | 4.93(18)    |
| N1   | C1   | C2   | C3   | -175.52(12) |
| N1   | C1   | C6   | C5   | 173.53(13)  |
| N2   | C8   | C10  | C11  | 25.23(17)   |
| N2   | C9   | C11  | C10  | 34.25(16)   |
| C1   | N1   | C7   | N2   | -172.87(12) |
| C1   | N1   | C7   | C1'  | 10.8(2)     |
| C1   | C2   | C3   | C4   | 2.1(2)      |
| C1'  | C2'  | C3'  | C4'  | 178.25(13)  |
| C1'  | C2'  | C7'  | C6'  | -178.86(12) |
| C1'  | C2'  | C7'  | C8'  | -0.66(18)   |
| C2   | C1   | C6   | C5   | 0.2(2)      |
| C2   | C3   | C4   | C5   | -1.2(2)     |
| C2'  | C1'  | C7   | N1   | -117.34(15) |
| C2'  | C1'  | C7   | N2   | 66.23(17)   |
| C2'  | C1'  | C10' | C9'  | -2.1(2)     |
| C2'  | C3'  | C4'  | C5'  | 0.5(2)      |
| C2'  | C7'  | C8'  | C9'  | -1.0(2)     |
| C3   | C4   | C5   | C6   | -0.2(2)     |
| C3'  | C2'  | C7'  | C6'  | -0.20(18)   |
| C3'  | C2'  | C7'  | C8'  | 178.00(12)  |
| C3'  | C4'  | C5'  | C6'  | 0.0(2)      |
| C4   | C5   | C6   | C1   | 0.7(2)      |
| C4'  | C5'  | C6'  | C7'  | -0.5(2)     |
| C5'  | C6'  | C7'  | C2'  | 0.6(2)      |
| C5'  | C6'  | C7'  | C8'  | -177.53(13) |
| C6   | C1   | C2   | O1   | 178.82(12)  |
| C6   | C1   | C2   | C3   | -1.63(19)   |
| C6'  | C7'  | C8'  | C9'  | 177.11(13)  |
| C7   | N1   | C1   | C2   | -126.45(14) |
| C7   | N1   | C1   | C6   | 60.12(19)   |
| C7   | N2   | C8   | C10  | -177.89(13) |
| C7   | N2   | C9   | C11  | 154.58(14)  |
| C7   | C1'  | C2'  | C3'  | 6.34(19)    |
| C7   | C1'  | C2'  | C7'  | -175.05(11) |
| C7   | C1'  | C10' | C9'  | 175.23(12)  |
| C7'  | C2'  | C3'  | C4'  | -0.4(2)     |
| C7'  | C8'  | C9'  | C10' | 1.2(2)      |
| C8   | N2   | C7   | N1   | 1.8(2)      |
| C8   | N2   | C7   | C1'  | 178.50(12)  |
| C8   | N2   | C9   | C11  | -19.39(16)  |
| C8   | C10  | C11  | C9   | -37.36(18)  |
| C8'  | C9'  | C10' | C1'  | 0.4(2)      |
| C9   | N2   | C7   | N1   | -171.57(13) |
| C9   | N2   | C7   | C1'  | 5.09(19)    |
| C9   | N2   | C8   | C10  | -3.64(16)   |
| C10' | C1'  | C2'  | C3'  | -176.38(12) |
| C10' | C1'  | C2'  | C7'  | 2.23(18)    |

| Atom | Atom | Atom | Atom | Angle/°     |
|------|------|------|------|-------------|
| C10' | C1'  | C7   | N1   | 65.34(18)   |
| C10' | C1'  | C7   | N2   | -111.09(14) |

**Table S26:** Hydrogen Bond information for **compound L5H**.

| D  | H  | A  | d(D-H)/Å | d(H-A)/Å | d(D-A)/Å   | D-H-A/deg |
|----|----|----|----------|----------|------------|-----------|
| O1 | H1 | N1 | 0.84     | 2.23     | 2.7045(15) | 116.2     |

## Crystal Data and Experimental

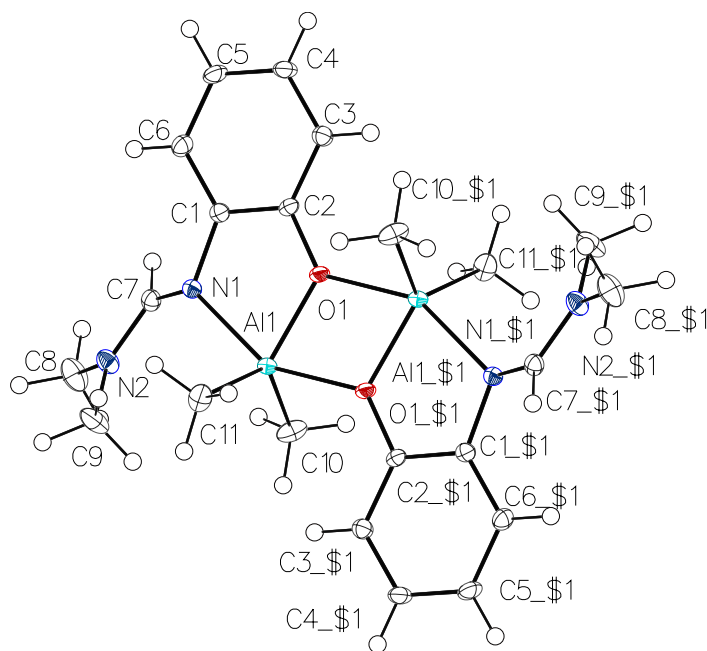

Figure S125: ORTEP view of compound 1a

**Experimental.** Single clear light colourless prism-shaped crystals of **compound 1a** recrystallised from DCM by slow evaporation. A suitable crystal with dimensions 0.27 x 0.22 x 0.17 mm<sup>3</sup> was selected and mounted on a MITIGEN holder oil on a Bruker D8 VENTURE diffractometer. The crystal was kept at a steady  $T = 100.0(1)$  K during data collection. The structure was solved with the **ShelXT**<sup>1</sup> solution program using dual methods and by using **Olex2**<sup>2</sup> 1.5 as the graphical interface. The model was refined with **ShelXL**<sup>3</sup> 2018/3 using full matrix least squares minimisation on  $F^2$ .

**Crystal Data.** C<sub>22</sub>H<sub>34</sub>Al<sub>2</sub>N<sub>4</sub>O<sub>2</sub>,  $M_r = 440.49$ , monoclinic,  $P2_1/n$  (No. 14),  $a = 8.7561(7)$  Å,  $b = 10.6856(7)$  Å,  $c = 12.8516(9)$  Å,  $\beta = 99.758(3)^\circ$ ,  $\alpha = \gamma = 90^\circ$ ,  $V = 1185.05(15)$  Å<sup>3</sup>,  $T = 100.0(1)$  K,  $Z = 2$ ,  $Z' = 0.5$ ,  $\mu(\text{Mo K}\alpha) = 0.148$ , 35086 reflections measured, 2733 unique ( $R_{\text{int}} = 0.0600$ ) which were used in all calculations. The final  $wR_2$  was 0.0915 (all data) and  $R_1$  was 0.0355 ( $I \geq 2 \sigma(I)$ ).

Table S27: Experimental parameters

| Compound                              | 1a                                                                            |
|---------------------------------------|-------------------------------------------------------------------------------|
| CCDC                                  | 2182074                                                                       |
| Formula                               | C <sub>22</sub> H <sub>34</sub> Al <sub>2</sub> N <sub>4</sub> O <sub>2</sub> |
| $D_{\text{calc.}} / \text{g cm}^{-3}$ | 1.234                                                                         |
| $\mu / \text{mm}^{-1}$                | 0.148                                                                         |
| Formula Weight                        | 440.49                                                                        |
| Colour                                | clear light colourless                                                        |
| Shape                                 | prism-shaped                                                                  |
| Size/mm <sup>3</sup>                  | 0.27x0.22x0.17                                                                |
| $T / \text{K}$                        | 100.0(1)                                                                      |
| Crystal System                        | monoclinic                                                                    |
| Space Group                           | $P2_1/n$                                                                      |
| $a / \text{Å}$                        | 8.7561(7)                                                                     |
| $b / \text{Å}$                        | 10.6856(7)                                                                    |
| $c / \text{Å}$                        | 12.8516(9)                                                                    |
| $\alpha / ^\circ$                     | 90                                                                            |
| $\beta / ^\circ$                      | 99.758(3)                                                                     |
| $\gamma / ^\circ$                     | 90                                                                            |
| $V / \text{Å}^3$                      | 1185.05(15)                                                                   |
| $Z$                                   | 2                                                                             |
| $Z'$                                  | 0.5                                                                           |
| Wavelength/Å                          | 0.71073                                                                       |
| Radiation type                        | Mo K $\alpha$                                                                 |
| $\theta_{\text{min}} / ^\circ$        | 3.034                                                                         |
| $\theta_{\text{max}} / ^\circ$        | 27.549                                                                        |
| Measured Refl's.                      | 35086                                                                         |
| Indep't Refl's                        | 2733                                                                          |
| Refl's $I \geq 2 \sigma(I)$           | 2337                                                                          |
| $R_{\text{int}}$                      | 0.0600                                                                        |
| Parameters                            | 140                                                                           |
| Restraints                            | 0                                                                             |
| Largest Peak                          | 0.301                                                                         |
| Deepest Hole                          | -0.274                                                                        |
| GooF                                  | 1.063                                                                         |
| $wR_2$ (all data)                     | 0.0915                                                                        |
| $wR_2$                                | 0.0859                                                                        |
| $R_1$ (all data)                      | 0.0464                                                                        |
| $R_1$                                 | 0.0355                                                                        |

**Table S28: Structure Quality Indicators**

|                     |                                 |       |                 |      |          |       |            |       |
|---------------------|---------------------------------|-------|-----------------|------|----------|-------|------------|-------|
| <b>Reflections:</b> | d min (Mo)<br>2 $\theta$ =55.1° | 0.77  | I/ $\sigma$ (I) | 44.8 | Rint     | 6.00% | Full 50.5° | 99.9  |
| <b>Refinement:</b>  | Shift                           | 0.000 | Max Peak        | 0.3  | Min Peak | -0.3  | Goof       | 1.063 |

A clear light colourless prism-shaped crystal with dimensions 0.27 x 0.22 x 0.17 mm<sup>3</sup> was mounted on a MITIGEN holder oil. Data were collected using a Bruker D8 VENTURE diffractometer operating at  $T = 100.0(1)$  K. Data were measured using  $\phi$  and  $\omega$  scans with Mo K $\alpha_1$  radiation. The diffraction pattern was indexed and the total number of runs, and images was based on the strategy calculation from the program **APEX4**<sup>6</sup>. The maximum resolution that was achieved was  $\theta = 27.549^\circ$  (0.77 Å). The unit cell was refined using **SAINT V8.40B**<sup>4</sup> on 9909 reflections, 28% of the observed reflections. Data reduction, scaling and absorption corrections were performed using **SAINT V8.40B**<sup>4</sup>. The final completeness is 99.90 % out to 27.549° in  $\theta$ . **SADABS-2016/2**<sup>5</sup> was used for absorption correction.  $wR_2(\text{int})$  was 0.0636 before and 0.0591 after correction. The Ratio of minimum to maximum transmission is 0.9215. The absorption coefficient  $\mu$  of this material is 0.148 mm<sup>-1</sup> at this wavelength ( $\lambda = 0.71073\text{Å}$ ) and the minimum and maximum transmissions are 0.894 and 0.971. The structure was solved, and the space group  $P2_1/n$  (# 14) determined by the **ShelXT**<sup>1</sup> structure solution program using dual methods and refined by full matrix least squares minimisation on  $F^2$  using version 2018/3 of **ShelXL**<sup>3</sup> 2018/3. All non-hydrogen atoms were refined anisotropically. Hydrogen atom positions were calculated geometrically and refined using the riding model. The value of Z' is 0.5. This means that only half of the formula unit is present in the asymmetric unit, with the other half consisting of symmetry equivalent atoms.

**Table S29: Bond Lengths in Å for compound 1a.**

| Atom | Atom            | Length/Å   | Atom | Atom | Length/Å   |
|------|-----------------|------------|------|------|------------|
| Al1  | O1              | 1.8509(10) | N1   | C1   | 1.4205(17) |
| Al1  | O1 <sup>1</sup> | 2.0254(11) | C2   | C1   | 1.4009(19) |
| Al1  | N1              | 2.1742(12) | C2   | C3   | 1.3881(19) |
| Al1  | C10             | 1.9751(15) | C1   | C6   | 1.3942(19) |
| Al1  | C11             | 1.9789(15) | C5   | C4   | 1.387(2)   |
| O1   | C2              | 1.3565(16) | C5   | C6   | 1.394(2)   |
| N2   | C7              | 1.3260(18) | C4   | C3   | 1.396(2)   |
| N2   | C9              | 1.454(2)   | ---- |      |            |
| N2   | C8              | 1.4594(19) |      |      |            |
| N1   | C7              | 1.3091(18) |      |      |            |

<sup>1</sup>1-x,1-y,1-z

**Table S30: Bond Angles in ° for compound 1a.**

| Atom            | Atom | Atom             | Angle/°    | Atom | Atom | Atom | Angle/°    |
|-----------------|------|------------------|------------|------|------|------|------------|
| O1              | Al1  | O1 <sup>1</sup>  | 73.25(5)   | C7   | N2   | C8   | 120.78(13) |
| O1 <sup>1</sup> | Al1  | N1               | 152.62(5)  | C9   | N2   | C8   | 116.58(13) |
| O1              | Al1  | N1               | 79.64(4)   | C7   | N1   | Al1  | 130.63(10) |
| O1              | Al1  | C10              | 118.82(6)  | C7   | N1   | C1   | 115.16(12) |
| O1              | Al1  | C11              | 116.20(6)  | C1   | N1   | Al1  | 108.29(9)  |
| C10             | Al1  | O1 <sup>1</sup>  | 94.94(6)   | N1   | C7   | N2   | 125.27(13) |
| C10             | Al1  | N1               | 94.74(6)   | O1   | C2   | C1   | 116.18(12) |
| C10             | Al1  | C11              | 124.45(7)  | O1   | C2   | C3   | 123.25(12) |
| C11             | Al1  | O1 <sup>1</sup>  | 93.50(5)   | C3   | C2   | C1   | 120.57(13) |
| C11             | Al1  | N1               | 101.93(6)  | C2   | C1   | N1   | 114.50(12) |
| Al1             | O1   | Al1 <sup>1</sup> | 106.75(5)  | C6   | C1   | N1   | 125.98(13) |
| C2              | O1   | Al1 <sup>1</sup> | 132.28(9)  | C6   | C1   | C2   | 119.43(13) |
| C2              | O1   | Al1              | 120.92(9)  | C4   | C5   | C6   | 120.04(13) |
| C7              | N2   | C9               | 122.57(13) | C5   | C4   | C3   | 120.47(13) |



| Atom | Atom | Atom | Angle/°    | ----                     |
|------|------|------|------------|--------------------------|
| C2   | C3   | C4   | 119.40(13) | <sup>1</sup> 1-x,1-y,1-z |
| C1   | C6   | C5   | 120.02(13) |                          |

**Table S31:** Torsion Angles in ° for **compound 1a**.

| Atom             | Atom | Atom | Atom             | Angle/°     |
|------------------|------|------|------------------|-------------|
| Al1              | O1   | C2   | C1               | -5.15(16)   |
| Al1 <sup>1</sup> | O1   | C2   | C1               | 177.75(9)   |
| Al1              | O1   | C2   | C3               | 174.33(10)  |
| Al1 <sup>1</sup> | O1   | C2   | C3               | -2.8(2)     |
| Al1              | N1   | C7   | N2               | 44.2(2)     |
| Al1              | N1   | C1   | C2               | 4.93(14)    |
| Al1              | N1   | C1   | C6               | -171.61(12) |
| O1 <sup>1</sup>  | Al1  | O1   | Al1 <sup>1</sup> | -0.001(1)   |
| O1 <sup>1</sup>  | Al1  | O1   | C2               | -177.76(13) |
| O1               | C2   | C1   | N1               | -0.72(17)   |
| O1               | C2   | C1   | C6               | 176.07(12)  |
| O1               | C2   | C3   | C4               | -176.92(13) |
| N1               | Al1  | O1   | Al1 <sup>1</sup> | -176.13(6)  |
| N1               | Al1  | O1   | C2               | 6.12(10)    |
| N1               | C1   | C6   | C5               | 178.65(13)  |
| C7               | N1   | C1   | C2               | -150.99(12) |
| C7               | N1   | C1   | C6               | 32.5(2)     |
| C2               | C1   | C6   | C5               | 2.3(2)      |
| C1               | N1   | C7   | N2               | -166.45(13) |
| C1               | C2   | C3   | C4               | 2.5(2)      |
| C5               | C4   | C3   | C2               | -0.5(2)     |
| C4               | C5   | C6   | C1               | -0.2(2)     |
| C3               | C2   | C1   | N1               | 179.78(12)  |
| C3               | C2   | C1   | C6               | -3.4(2)     |
| C6               | C5   | C4   | C3               | -0.7(2)     |
| C10              | Al1  | O1   | Al1 <sup>1</sup> | -86.39(7)   |
| C10              | Al1  | O1   | C2               | 95.85(11)   |
| C11              | Al1  | O1   | Al1 <sup>1</sup> | 85.58(7)    |
| C11              | Al1  | O1   | C2               | -92.18(11)  |
| C9               | N2   | C7   | N1               | 6.9(2)      |
| C8               | N2   | C7   | N1               | -169.98(14) |

----  
<sup>1</sup>1-x,1-y,1-z

# Compound 1b

## Crystal Data and Experimental

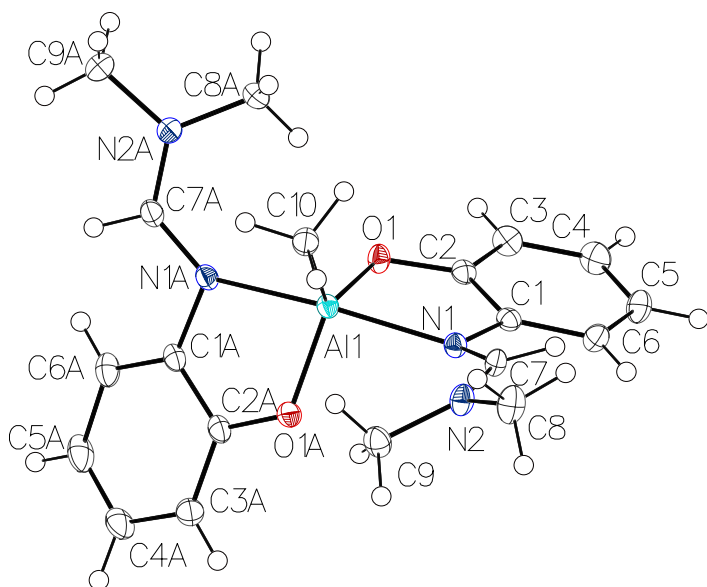

**Figure S126:** ORTEP view of compound **1b**

**Experimental.** Single clear light colourless prism-shaped crystals of **compound 1b** recrystallised from DCM by slow evaporation. A suitable crystal with dimensions 0.63 x 0.22 x 0.22 mm<sup>3</sup> was selected and mounted on a MITIGEN holder oil on a Bruker D8 Venture diffractometer. The crystal was kept at a steady  $T = 120.0(1)$  K during data collection. The structure was solved with the **ShelXT**<sup>1</sup> solution program using dual methods and by using **Olex2**<sup>2</sup> 1.5 as the graphical interface. The model was refined with **ShelXL**<sup>3</sup> 2018/3 using full matrix least squares minimisation on  $F^2$ .

**Crystal Data.** C<sub>19</sub>H<sub>25</sub>AlN<sub>4</sub>O<sub>2</sub>,  $M_r = 368.41$ , monoclinic,  $P2_1/c$  (No. 14),  $a = 12.0344(13)$  Å,  $b = 13.1284(16)$  Å,  $c = 12.6875(15)$  Å,  $\beta = 107.976(4)^\circ$ ,  $\alpha = \gamma = 90^\circ$ ,  $V = 1906.7(4)$  Å<sup>3</sup>,  $T = 120.0(1)$  K,  $Z = 4$ ,  $Z' = 1$ ,  $\mu(\text{MoK}\alpha) = 0.127$ , 49921 reflections measured, 4390 unique ( $R_{\text{int}} = 0.0620$ ) which were used in all calculations. The final  $wR_2$  was 0.0971 (all data) and  $R_1$  was 0.0378 ( $I \geq 2 \sigma(I)$ ).

**Table S32: Experimental parameters**

| Compound                              | <b>1b</b>                                                       |
|---------------------------------------|-----------------------------------------------------------------|
| CCDC                                  | <b>2182075</b>                                                  |
| Formula                               | C <sub>19</sub> H <sub>25</sub> AlN <sub>4</sub> O <sub>2</sub> |
| $D_{\text{calc.}} / \text{g cm}^{-3}$ | 1.283                                                           |
| $\mu / \text{mm}^{-1}$                | 0.127                                                           |
| Formula Weight                        | 368.41                                                          |
| Colour                                | clear light colourless                                          |
| Shape                                 | prism-shaped                                                    |
| Size/mm <sup>3</sup>                  | 0.63x0.22x0.22                                                  |
| $T/\text{K}$                          | 120.0(1)                                                        |
| Crystal System                        | monoclinic                                                      |
| Space Group                           | $P2_1/c$                                                        |
| $a/\text{Å}$                          | 12.0344(13)                                                     |
| $b/\text{Å}$                          | 13.1284(16)                                                     |
| $c/\text{Å}$                          | 12.6875(15)                                                     |
| $\alpha/^\circ$                       | 90                                                              |
| $\beta/^\circ$                        | 107.976(4)                                                      |
| $\gamma/^\circ$                       | 90                                                              |
| $V/\text{Å}^3$                        | 1906.7(4)                                                       |
| $Z$                                   | 4                                                               |
| $Z'$                                  | 1                                                               |
| Wavelength/Å                          | 0.71073                                                         |
| Radiation type                        | MoK $\alpha$                                                    |
| $\theta_{\text{min}}/^\circ$          | 2.563                                                           |
| $\theta_{\text{max}}/^\circ$          | 27.584                                                          |
| Measured Refl's.                      | 49921                                                           |
| Indep't Refl's                        | 4390                                                            |
| Refl's $I \geq 2 \sigma(I)$           | 3550                                                            |
| $R_{\text{int}}$                      | 0.0620                                                          |
| Parameters                            | 240                                                             |
| Restraints                            | 0                                                               |
| Largest Peak                          | 0.338                                                           |
| Deepest Hole                          | -0.386                                                          |
| GooF                                  | 1.038                                                           |
| $wR_2$ (all data)                     | 0.0971                                                          |
| $wR_2$                                | 0.0867                                                          |
| $R_1$ (all data)                      | 0.0559                                                          |
| $R_1$                                 | 0.0378                                                          |

**Table S33: Structure Quality Indicators**

|                     |                                 |       |                 |      |          |       |                            |       |
|---------------------|---------------------------------|-------|-----------------|------|----------|-------|----------------------------|-------|
| <b>Reflections:</b> | d min (Mo)<br>2 $\theta$ =55.2° | 0.77  | I/ $\sigma$ (I) | 38.2 | Rint     | 6.20% | Full 50.5°<br>99% to 55.2° | 99.9  |
| <b>Refinement:</b>  | Shift                           | 0.000 | Max Peak        | 0.3  | Min Peak | -0.4  | Goof                       | 1.038 |

A clear light colourless prism-shaped crystal with dimensions 0.63 x 0.22 x 0.22 mm<sup>3</sup> was mounted on a MITIGEN holder oil. Data were collected using a Bruker D8 Venture diffractometer equipped with an Oxford Cryosystems low-temperature device operating at  $T = 120.0(1)$  K. Data were measured using  $\phi$  and  $\omega$  scans with MoK $\alpha$  radiation. The maximum resolution that was achieved was  $\theta = 27.584^\circ$  (0.77 Å). The unit cell was refined using **SAINT V8.40B**<sup>4</sup> on 9714 reflections, 19% of the observed reflections. Data reduction, scaling and absorption corrections were performed using **SAINT V8.40B**<sup>4</sup>. The final completeness is 99.90 % out to 27.584° in  $\theta$ . **SADABS-2016/2**<sup>5</sup> was used for absorption correction.  $wR_2(\text{int})$  was 0.0681 before and 0.0568 after correction. The Ratio of minimum to maximum transmission is 0.9196. The absorption coefficient  $\mu$  of this material is 0.127 mm<sup>-1</sup> at this wavelength ( $\lambda = 0.71073\text{Å}$ ) and the minimum and maximum transmissions are 0.892 and 0.971. The structure was solved, and the space group  $P2_1/c$  (# 14) determined by the **ShelXT**<sup>1</sup> structure solution program using dual methods and refined by full matrix least squares minimisation on  $F^2$  using version 2018/3 of **ShelXL**<sup>3</sup> 2018/3. All non-hydrogen atoms were refined anisotropically. Hydrogen atom positions were calculated geometrically and refined using the riding model. There is a single molecule in the asymmetric unit, which is represented by the reported sum formula. In other words: Z is 4 and Z' is 1.

**Table S34: Bond Lengths in Å for compound 1b.**

| Atom | Atom | Length/Å   | Atom | Atom | Length/Å   |
|------|------|------------|------|------|------------|
| Al1  | O1   | 1.8000(11) | N2A  | C8A  | 1.4526(19) |
| Al1  | O1A  | 1.7905(11) | N2A  | C9A  | 1.458(2)   |
| Al1  | N1   | 2.1109(13) | C1   | C2   | 1.408(2)   |
| Al1  | N1A  | 2.1604(13) | C1   | C6   | 1.393(2)   |
| Al1  | C10  | 1.9802(16) | C1A  | C2A  | 1.404(2)   |
| O1   | C2   | 1.3418(17) | C1A  | C6A  | 1.395(2)   |
| O1A  | C2A  | 1.3414(18) | C2   | C3   | 1.388(2)   |
| N1   | C1   | 1.4221(18) | C2A  | C3A  | 1.391(2)   |
| N1   | C7   | 1.3147(19) | C3   | C4   | 1.395(2)   |
| N1A  | C1A  | 1.4233(18) | C3A  | C4A  | 1.394(2)   |
| N1A  | C7A  | 1.3062(19) | C4   | C5   | 1.383(2)   |
| N2   | C7   | 1.3199(19) | C4A  | C5A  | 1.382(3)   |
| N2   | C8   | 1.4644(19) | C5   | C6   | 1.395(2)   |
| N2   | C9   | 1.4600(19) | C5A  | C6A  | 1.394(2)   |
| N2A  | C7A  | 1.3275(19) |      |      |            |

**Table S35: Bond Angles in ° for compound 1b.**

| Atom | Atom | Atom | Angle/°   | Atom | Atom | Atom | Angle/°    |
|------|------|------|-----------|------|------|------|------------|
| O1   | Al1  | N1   | 82.74(5)  | C2A  | O1A  | Al1  | 118.90(9)  |
| O1   | Al1  | N1A  | 85.97(5)  | C1   | N1   | Al1  | 107.64(9)  |
| O1   | Al1  | C10  | 123.06(6) | C7   | N1   | Al1  | 133.01(10) |
| O1A  | Al1  | O1   | 116.74(5) | C7   | N1   | C1   | 115.74(12) |
| O1A  | Al1  | N1   | 93.66(5)  | C1A  | N1A  | Al1  | 105.89(9)  |
| O1A  | Al1  | N1A  | 81.99(5)  | C7A  | N1A  | Al1  | 136.70(10) |
| O1A  | Al1  | C10  | 120.04(6) | C7A  | N1A  | C1A  | 115.50(12) |
| N1   | Al1  | N1A  | 164.53(5) | C7   | N2   | C8   | 120.26(13) |
| C10  | Al1  | N1   | 97.49(6)  | C7   | N2   | C9   | 123.73(13) |
| C10  | Al1  | N1A  | 97.53(6)  | C9   | N2   | C8   | 115.95(12) |
| C2   | O1   | Al1  | 118.45(9) | C7A  | N2A  | C8A  | 123.89(13) |

| Atom | Atom | Atom | Angle/°    | Atom | Atom | Atom | Angle/°    |
|------|------|------|------------|------|------|------|------------|
| C7A  | N2A  | C9A  | 120.42(13) | O1A  | C2A  | C3A  | 122.34(14) |
| C8A  | N2A  | C9A  | 115.66(12) | C3A  | C2A  | C1A  | 119.40(14) |
| C2   | C1   | N1   | 112.96(12) | C2   | C3   | C4   | 120.13(15) |
| C6   | C1   | N1   | 127.34(13) | C2A  | C3A  | C4A  | 119.95(16) |
| C6   | C1   | C2   | 119.67(13) | C5   | C4   | C3   | 119.93(14) |
| C2A  | C1A  | N1A  | 113.30(12) | C5A  | C4A  | C3A  | 120.37(15) |
| C6A  | C1A  | N1A  | 126.59(14) | C4   | C5   | C6   | 120.61(15) |
| C6A  | C1A  | C2A  | 120.06(14) | C4A  | C5A  | C6A  | 120.23(15) |
| O1   | C2   | C1   | 117.98(13) | C1   | C6   | C5   | 119.74(14) |
| O1   | C2   | C3   | 122.14(13) | C5A  | C6A  | C1A  | 119.54(16) |
| C3   | C2   | C1   | 119.88(14) | N1   | C7   | N2   | 126.25(14) |
| O1A  | C2A  | C1A  | 118.26(13) | N1A  | C7A  | N2A  | 126.98(14) |

**Table S36:** Torsion Angles in ° for **compound 1b**.

| Atom | Atom | Atom | Atom | Angle/°     |
|------|------|------|------|-------------|
| Al1  | O1   | C2   | C1   | -2.74(17)   |
| Al1  | O1   | C2   | C3   | 177.11(11)  |
| Al1  | O1A  | C2A  | C1A  | -6.26(18)   |
| Al1  | O1A  | C2A  | C3A  | 174.31(12)  |
| Al1  | N1   | C1   | C2   | 3.82(14)    |
| Al1  | N1   | C1   | C6   | -174.42(13) |
| Al1  | N1   | C7   | N2   | 35.7(2)     |
| Al1  | N1A  | C1A  | C2A  | 11.06(14)   |
| Al1  | N1A  | C1A  | C6A  | -166.37(13) |
| Al1  | N1A  | C7A  | N2A  | 28.4(2)     |
| O1   | Al1  | O1A  | C2A  | -71.49(12)  |
| O1   | C2   | C3   | C4   | -178.47(14) |
| O1A  | Al1  | O1   | C2   | -86.60(11)  |
| O1A  | C2A  | C3A  | C4A  | -176.38(15) |
| N1   | Al1  | O1   | C2   | 3.85(10)    |
| N1   | Al1  | O1A  | C2A  | -155.20(11) |
| N1   | C1   | C2   | O1   | -1.25(18)   |
| N1   | C1   | C2   | C3   | 178.90(13)  |
| N1   | C1   | C6   | C5   | -179.51(14) |
| N1A  | Al1  | O1   | C2   | -165.54(10) |
| N1A  | Al1  | O1A  | C2A  | 9.87(11)    |
| N1A  | C1A  | C2A  | O1A  | -4.89(19)   |
| N1A  | C1A  | C2A  | C3A  | 174.56(13)  |
| N1A  | C1A  | C6A  | C5A  | -177.09(14) |
| C1   | N1   | C7   | N2   | -168.84(14) |
| C1   | C2   | C3   | C4   | 1.4(2)      |
| C1A  | N1A  | C7A  | N2A  | -170.05(14) |
| C1A  | C2A  | C3A  | C4A  | 4.2(2)      |
| C2   | C1   | C6   | C5   | 2.4(2)      |
| C2   | C3   | C4   | C5   | 0.3(2)      |
| C2A  | C1A  | C6A  | C5A  | 5.6(2)      |
| C2A  | C3A  | C4A  | C5A  | 1.6(3)      |
| C3   | C4   | C5   | C6   | -0.7(3)     |
| C3A  | C4A  | C5A  | C6A  | -3.8(3)     |
| C4   | C5   | C6   | C1   | -0.7(2)     |
| C4A  | C5A  | C6A  | C1A  | 0.2(2)      |
| C6   | C1   | C2   | O1   | 177.14(13)  |
| C6   | C1   | C2   | C3   | -2.7(2)     |
| C6A  | C1A  | C2A  | O1A  | 172.73(13)  |
| C6A  | C1A  | C2A  | C3A  | -7.8(2)     |
| C7   | N1   | C1   | C2   | -157.61(13) |
| C7   | N1   | C1   | C6   | 24.1(2)     |
| C7A  | N1A  | C1A  | C2A  | -155.91(13) |

| <b>Atom</b> | <b>Atom</b> | <b>Atom</b> | <b>Atom</b> | <b>Angle/°</b> |
|-------------|-------------|-------------|-------------|----------------|
| C7A         | N1A         | C1A         | C6A         | 26.7(2)        |
| C8          | N2          | C7          | N1          | -171.65(15)    |
| C8A         | N2A         | C7A         | N1A         | 7.3(2)         |
| C9          | N2          | C7          | N1          | 11.3(2)        |
| C9A         | N2A         | C7A         | N1A         | -174.47(16)    |
| C10         | A11         | O1          | C2          | 98.09(11)      |
| C10         | A11         | O1A         | C2A         | 103.97(11)     |

## Crystal Data and Experimental

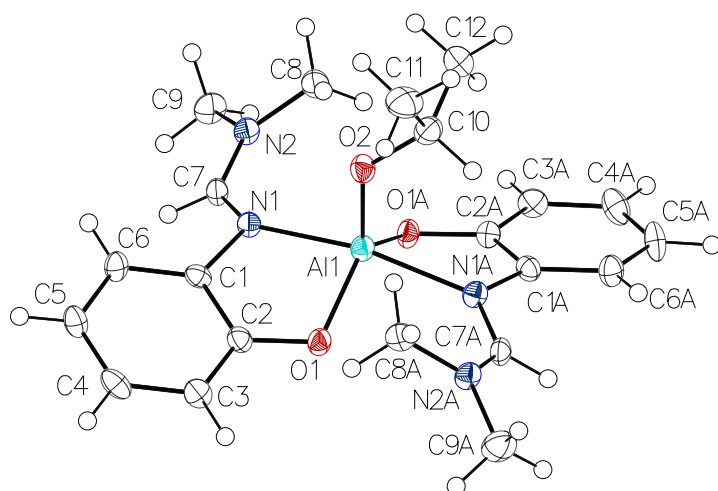

**Figure S127:** ORTEP view of compound **1b'**

**Experimental.** Single clear light colourless prism-shaped crystals of **compound 1b'** recrystallised from a mixture of DCM and pentane by slow evaporation. A suitable crystal with dimensions 0.22 x 0.21 x 0.11 mm<sup>3</sup> was selected and mounted on a MITIGEN holder oil on a Nonius APEX-II CCD diffractometer. The crystal was kept at a steady  $T = 115.0(1)$  K during data collection. The structure was solved with the **ShelXT**<sup>1</sup> solution program using dual methods and by using **Olex2**<sup>2</sup> 1.5 as the graphical interface. The model was refined with **ShelXL**<sup>3</sup> 2018/3 using full matrix least squares minimisation on  $F^2$ .

**Crystal Data.** C<sub>21</sub>H<sub>29</sub>AlN<sub>4</sub>O<sub>3</sub>,  $M_r = 412.46$ , monoclinic,  $P2_1/n$  (No. 14),  $a = 10.6976(5)$  Å,  $b = 7.7241(4)$  Å,  $c = 25.9622(11)$  Å,  $\beta = 95.4237(15)^\circ$ ,  $\alpha = \gamma = 90^\circ$ ,  $V = 2135.63(17)$  Å<sup>3</sup>,  $T = 115.0(1)$  K,  $Z = 4$ ,  $Z' = 1$ ,  $\mu(\text{Mo K}\alpha_1) = 0.124$ , 19967 reflections measured, 3760 unique ( $R_{\text{int}} = 0.0870$ ) which were used in all calculations. The final  $wR_2$  was 0.1373 (all data) and  $R_1$  was 0.0547 ( $I \geq 2 \sigma(I)$ ).

**Table S37: Experimental parameters**

| Compound                              | <b>1b'</b>                                                      |
|---------------------------------------|-----------------------------------------------------------------|
| CCDC                                  | <b>2182076</b>                                                  |
| Formula                               | C <sub>21</sub> H <sub>29</sub> AlN <sub>4</sub> O <sub>3</sub> |
| $D_{\text{calc.}} / \text{g cm}^{-3}$ | 1.283                                                           |
| $\mu / \text{mm}^{-1}$                | 0.124                                                           |
| Formula Weight                        | 412.46                                                          |
| Colour                                | clear light colourless                                          |
| Shape                                 | prism-shaped                                                    |
| Size/mm <sup>3</sup>                  | 0.22x0.21x0.11                                                  |
| $T/\text{K}$                          | 115.0(1)                                                        |
| Crystal System                        | monoclinic                                                      |
| Space Group                           | $P2_1/n$                                                        |
| $a/\text{Å}$                          | 10.6976(5)                                                      |
| $b/\text{Å}$                          | 7.7241(4)                                                       |
| $c/\text{Å}$                          | 25.9622(11)                                                     |
| $\alpha/^\circ$                       | 90                                                              |
| $\beta/^\circ$                        | 95.4237(15)                                                     |
| $\gamma/^\circ$                       | 90                                                              |
| $V/\text{Å}^3$                        | 2135.63(17)                                                     |
| $Z$                                   | 4                                                               |
| $Z'$                                  | 1                                                               |
| Wavelength/Å                          | 0.71073                                                         |
| Radiation type                        | Mo K $\alpha_1$                                                 |
| $\Theta_{\text{min}}/^\circ$          | 2.752                                                           |
| $\Theta_{\text{max}}/^\circ$          | 24.995                                                          |
| Measured Refl's.                      | 19967                                                           |
| Indep't Refl's                        | 3760                                                            |
| Refl's $I \geq 2 \sigma(I)$           | 2304                                                            |
| $R_{\text{int}}$                      | 0.0870                                                          |
| Parameters                            | 268                                                             |
| Restraints                            | 0                                                               |
| Largest Peak                          | 0.262                                                           |
| Deepest Hole                          | -0.443                                                          |
| GooF                                  | 1.013                                                           |
| $wR_2$ (all data)                     | 0.1373                                                          |
| $wR_2$                                | 0.1125                                                          |
| $R_1$ (all data)                      | 0.1115                                                          |
| $R_1$                                 | 0.0547                                                          |

**Table S38: Structure Quality Indicators**

|                     |                                 |        |                 |      |          |       |            |       |
|---------------------|---------------------------------|--------|-----------------|------|----------|-------|------------|-------|
| <b>Reflections:</b> | d min (Mo)<br>2 $\theta$ =50.0° | 0.84   | I/ $\sigma$ (I) | 11.6 | Rint     | 8.70% | Full 50.0° | 99.9  |
| <b>Refinement:</b>  | Shift                           | -0.001 | Max Peak        | 0.3  | Min Peak | -0.4  | Goof       | 1.013 |

A clear light colourless prism-shaped crystal with dimensions 0.22 x 0.21 x 0.11 mm<sup>3</sup> was mounted on a MITIGEN holder oil. Data were collected using a Nonius APEX-II CCD diffractometer equipped with an Oxford Cryosystems low-temperature device operating at  $T = 115.0(1)$  K. Data were measured using  $\phi$  and  $\omega$  scans with Mo  $K_{\alpha 1}$  radiation. The diffraction pattern was indexed and the total number of runs, and images was based on the strategy calculation from the program **APEX4**<sup>6</sup>. The maximum resolution that was achieved was  $\theta = 24.995^\circ$  (0.84 Å). The unit cell was refined using **SAINT V8.40B**<sup>4</sup> on 5488 reflections, 27% of the observed reflections. Data reduction, scaling and absorption corrections were performed using **SAINT V8.40B**<sup>4</sup>. The final completeness is 99.90 % out to 24.995° in  $\theta$ . **SADABS-2016/2**<sup>5</sup> was used for absorption correction.  $wR_2(\text{int})$  was 0.0733 before and 0.0615 after correction. The Ratio of minimum to maximum transmission is 0.8675. The absorption coefficient  $\mu$  of this material is 0.124 mm<sup>-1</sup> at this wavelength ( $\lambda = 0.71073$  Å) and the minimum and maximum transmissions are 0.832 and 0.959. The structure was solved, and the space group  $P2_1/n$  (# 14) determined by the **ShelXT**<sup>1</sup> structure solution program using dual methods and refined by full matrix least squares minimisation on  $F^2$  using version 2018/3 of **ShelXL**<sup>3</sup> 2018/3. All non-hydrogen atoms were refined anisotropically. Hydrogen atom positions were calculated geometrically and refined using the riding model. There is a single molecule in the asymmetric unit, which is represented by the reported sum formula. In other words: Z is 4 and Z' is 1.

**Table S39: Bond Lengths in Å for compound 1b'.**

| Atom | Atom | Length/Å | Atom | Atom | Length/Å |
|------|------|----------|------|------|----------|
| Al1  | O1   | 1.795(2) | N2A  | C8A  | 1.460(4) |
| Al1  | O1A  | 1.787(2) | N2A  | C9A  | 1.457(4) |
| Al1  | O2   | 1.739(2) | C1   | C2   | 1.409(4) |
| Al1  | N1   | 2.053(2) | C1   | C6   | 1.391(4) |
| Al1  | N1A  | 2.092(2) | C1A  | C2A  | 1.409(4) |
| O1   | C2   | 1.344(3) | C1A  | C6A  | 1.385(4) |
| O1A  | C2A  | 1.342(3) | C2   | C3   | 1.386(4) |
| O2   | C10  | 1.415(4) | C2A  | C3A  | 1.387(4) |
| N1   | C1   | 1.422(4) | C3   | C4   | 1.391(4) |
| N1   | C7   | 1.315(4) | C3A  | C4A  | 1.390(4) |
| N1A  | C1A  | 1.427(4) | C4   | C5   | 1.380(4) |
| N1A  | C7A  | 1.309(4) | C4A  | C5A  | 1.388(5) |
| N2   | C7   | 1.322(4) | C5   | C6   | 1.389(4) |
| N2   | C8   | 1.457(4) | C5A  | C6A  | 1.383(4) |
| N2   | C9   | 1.466(4) | C10  | C11  | 1.519(5) |
| N2A  | C7A  | 1.320(4) | C10  | C12  | 1.517(4) |

**Table S40: Bond Angles in ° for compound 1b'.**

| Atom | Atom | Atom | Angle/°    | Atom | Atom | Atom | Angle/°    |
|------|------|------|------------|------|------|------|------------|
| O1   | Al1  | N1   | 83.66(10)  | O2   | Al1  | N1   | 93.98(11)  |
| O1   | Al1  | N1A  | 88.44(10)  | O2   | Al1  | N1A  | 97.09(10)  |
| O1A  | Al1  | O1   | 122.92(11) | N1   | Al1  | N1A  | 168.55(11) |
| O1A  | Al1  | N1   | 94.04(10)  | C2   | O1   | Al1  | 114.24(18) |
| O1A  | Al1  | N1A  | 83.30(10)  | C2A  | O1A  | Al1  | 116.25(18) |
| O2   | Al1  | O1   | 118.86(11) | C10  | O2   | Al1  | 129.38(19) |
| O2   | Al1  | O1A  | 118.20(11) | C1   | N1   | Al1  | 105.24(17) |

| Atom | Atom | Atom | Angle/°    | Atom | Atom | Atom | Angle/°  |
|------|------|------|------------|------|------|------|----------|
| C7   | N1   | Al1  | 136.3(2)   | O1   | C2   | C3   | 123.8(3) |
| C7   | N1   | C1   | 115.9(2)   | C3   | C2   | C1   | 119.4(3) |
| C1A  | N1A  | Al1  | 106.07(18) | O1A  | C2A  | C1A  | 117.5(3) |
| C7A  | N1A  | Al1  | 134.9(2)   | O1A  | C2A  | C3A  | 123.2(3) |
| C7A  | N1A  | C1A  | 116.7(2)   | C3A  | C2A  | C1A  | 119.3(3) |
| C7   | N2   | C8   | 123.6(2)   | C2   | C3   | C4   | 119.8(3) |
| C7   | N2   | C9   | 120.1(3)   | C2A  | C3A  | C4A  | 120.2(3) |
| C8   | N2   | C9   | 116.3(2)   | C5   | C4   | C3   | 120.6(3) |
| C7A  | N2A  | C8A  | 125.0(3)   | C5A  | C4A  | C3A  | 120.4(3) |
| C7A  | N2A  | C9A  | 120.4(3)   | C4   | C5   | C6   | 120.6(3) |
| C9A  | N2A  | C8A  | 114.7(2)   | C6A  | C5A  | C4A  | 119.8(3) |
| C2   | C1   | N1   | 113.0(3)   | C5   | C6   | C1   | 119.1(3) |
| C6   | C1   | N1   | 126.4(3)   | C5A  | C6A  | C1A  | 120.4(3) |
| C6   | C1   | C2   | 120.5(3)   | N1   | C7   | N2   | 126.4(3) |
| C2A  | C1A  | N1A  | 112.9(2)   | N1A  | C7A  | N2A  | 127.2(3) |
| C6A  | C1A  | N1A  | 127.1(3)   | O2   | C10  | C11  | 110.2(3) |
| C6A  | C1A  | C2A  | 120.0(3)   | O2   | C10  | C12  | 110.4(3) |
| O1   | C2   | C1   | 116.8(3)   | C12  | C10  | C11  | 111.3(3) |

**Table S41:** Torsion Angles in ° for **compound 1b'**.

| Atom | Atom | Atom | Atom | Angle/°   |
|------|------|------|------|-----------|
| Al1  | O1   | C2   | C1   | 20.0(3)   |
| Al1  | O1   | C2   | C3   | -157.5(3) |
| Al1  | O1A  | C2A  | C1A  | 17.7(3)   |
| Al1  | O1A  | C2A  | C3A  | -161.9(3) |
| Al1  | O2   | C10  | C11  | -146.7(2) |
| Al1  | O2   | C10  | C12  | 90.0(3)   |
| Al1  | N1   | C1   | C2   | -17.2(3)  |
| Al1  | N1   | C1   | C6   | 159.3(3)  |
| Al1  | N1   | C7   | N2   | -35.3(5)  |
| Al1  | N1A  | C1A  | C2A  | -10.6(3)  |
| Al1  | N1A  | C1A  | C6A  | 166.5(3)  |
| Al1  | N1A  | C7A  | N2A  | -31.8(5)  |
| O1   | Al1  | O1A  | C2A  | -102.2(2) |
| O1   | Al1  | O2   | C10  | 113.3(2)  |
| O1   | C2   | C3   | C4   | 176.9(3)  |
| O1A  | Al1  | O1   | C2   | -114.3(2) |
| O1A  | Al1  | O2   | C10  | -65.0(3)  |
| O1A  | C2A  | C3A  | C4A  | -179.3(3) |
| O2   | Al1  | O1   | C2   | 67.5(2)   |
| O2   | Al1  | O1A  | C2A  | 76.1(2)   |
| N1   | Al1  | O1   | C2   | -23.5(2)  |
| N1   | Al1  | O1A  | C2A  | 172.8(2)  |
| N1   | Al1  | O2   | C10  | -161.8(2) |
| N1   | C1   | C2   | O1   | 0.6(4)    |
| N1   | C1   | C2   | C3   | 178.2(3)  |
| N1   | C1   | C6   | C5   | -178.3(3) |
| N1A  | Al1  | O1   | C2   | 164.8(2)  |
| N1A  | Al1  | O1A  | C2A  | -18.4(2)  |
| N1A  | Al1  | O2   | C10  | 21.1(3)   |
| N1A  | C1A  | C2A  | O1A  | -2.6(4)   |
| N1A  | C1A  | C2A  | C3A  | 177.0(3)  |
| N1A  | C1A  | C6A  | C5A  | -178.3(3) |
| C1   | N1   | C7   | N2   | 166.1(3)  |
| C1   | C2   | C3   | C4   | -0.5(5)   |
| C1A  | N1A  | C7A  | N2A  | 168.2(3)  |
| C1A  | C2A  | C3A  | C4A  | 1.2(5)    |
| C2   | C1   | C6   | C5   | -2.0(5)   |



| Atom | Atom | Atom | Atom | Angle/°   |
|------|------|------|------|-----------|
| C2   | C3   | C4   | C5   | 0.2(5)    |
| C2A  | C1A  | C6A  | C5A  | -1.4(5)   |
| C2A  | C3A  | C4A  | C5A  | -0.2(5)   |
| C3   | C4   | C5   | C6   | -0.8(5)   |
| C3A  | C4A  | C5A  | C6A  | -1.5(5)   |
| C4   | C5   | C6   | C1   | 1.7(5)    |
| C4A  | C5A  | C6A  | C1A  | 2.3(5)    |
| C6   | C1   | C2   | O1   | -176.2(3) |
| C6   | C1   | C2   | C3   | 1.4(5)    |
| C6A  | C1A  | C2A  | O1A  | -179.9(3) |
| C6A  | C1A  | C2A  | C3A  | -0.3(5)   |
| C7   | N1   | C1   | C2   | 147.7(3)  |
| C7   | N1   | C1   | C6   | -35.8(4)  |
| C7A  | N1A  | C1A  | C2A  | 154.8(3)  |
| C7A  | N1A  | C1A  | C6A  | -28.1(5)  |
| C8   | N2   | C7   | N1   | -8.4(5)   |
| C8A  | N2A  | C7A  | N1A  | -7.0(5)   |
| C9   | N2   | C7   | N1   | 171.6(3)  |
| C9A  | N2A  | C7A  | N1A  | 173.4(3)  |

# Compound 2b

## Crystal Data and Experimental

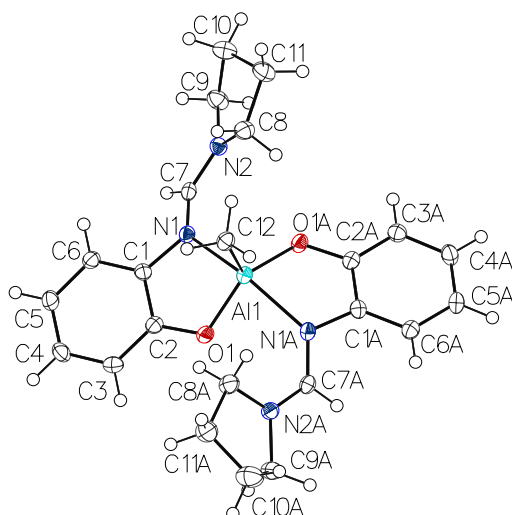

**Figure S128:** ORTEP view of compound **2b**

**Experimental.** Single clear light colourless prism-shaped crystals of **compound 2b** recrystallised from a mixture of DCM and pentane by slow evaporation. A suitable crystal with dimensions 0.21 x 0.21 x 0.15 mm<sup>3</sup> was selected and mounted on a MITIGEN holder oil on a Nonius APEX-II CCD diffractometer. The crystal was kept at a steady  $T = 110.0(1)$  K during data collection. The structure was solved with the **ShelXT**<sup>1</sup> 2018/2 solution program using dual methods and by using **Olex2**<sup>2</sup> 1.5 as the graphical interface. The model was refined with **ShelXL**<sup>3</sup> 2018/3 using full matrix least squares minimisation on  $F^2$ .

**Crystal Data.** C<sub>23</sub>H<sub>29</sub>AlN<sub>4</sub>O<sub>2</sub>,  $M_r = 420.48$ , monoclinic,  $P2_1/c$  (No. 14),  $a = 11.5025(6)$  Å,  $b = 17.2998(10)$  Å,  $c = 11.5070(6)$  Å,  $\beta = 107.584(2)^\circ$ ,  $\alpha = \gamma = 90^\circ$ ,  $V = 2182.8(2)$  Å<sup>3</sup>,  $T = 110.0(1)$  K,  $Z = 4$ ,  $Z' = 1$ ,  $\mu(\text{Mo K}\alpha_1) = 0.120$ , 44219 reflections measured, 5007 unique ( $R_{\text{int}} = 0.0556$ ) which were used in all calculations. The final  $wR_2$  was 0.1292 (all data) and  $R_1$  was 0.0465 ( $I \geq 2 \sigma(I)$ ).

**Table S42: Experimental parameters**

| Compound                              | <b>2b</b>                                                       |
|---------------------------------------|-----------------------------------------------------------------|
| CCDC                                  | <b>2182077</b>                                                  |
| Formula                               | C <sub>23</sub> H <sub>29</sub> AlN <sub>4</sub> O <sub>2</sub> |
| $D_{\text{calc.}} / \text{g cm}^{-3}$ | 1.280                                                           |
| $\mu / \text{mm}^{-1}$                | 0.120                                                           |
| Formula Weight                        | 420.48                                                          |
| Colour                                | clear light colourless                                          |
| Shape                                 | prism-shaped                                                    |
| Size/mm <sup>3</sup>                  | 0.21x0.21x0.15                                                  |
| $T/\text{K}$                          | 110.0(1)                                                        |
| Crystal System                        | monoclinic                                                      |
| Space Group                           | $P2_1/c$                                                        |
| $a/\text{Å}$                          | 11.5025(6)                                                      |
| $b/\text{Å}$                          | 17.2998(10)                                                     |
| $c/\text{Å}$                          | 11.5070(6)                                                      |
| $\alpha/^\circ$                       | 90                                                              |
| $\beta/^\circ$                        | 107.584(2)                                                      |
| $\gamma/^\circ$                       | 90                                                              |
| $V/\text{Å}^3$                        | 2182.8(2)                                                       |
| $Z$                                   | 4                                                               |
| $Z'$                                  | 1                                                               |
| Wavelength/Å                          | 0.71073                                                         |
| Radiation type                        | Mo K $\alpha_1$                                                 |
| $\theta_{\text{min}}/^\circ$          | 2.490                                                           |
| $\theta_{\text{max}}/^\circ$          | 27.532                                                          |
| Measured Refl's.                      | 44219                                                           |
| Indep't Refl's                        | 5007                                                            |
| Refl's $I \geq 2 \sigma(I)$           | 3463                                                            |
| $R_{\text{int}}$                      | 0.0556                                                          |
| Parameters                            | 272                                                             |
| Restraints                            | 0                                                               |
| Largest Peak                          | 1.029                                                           |
| Deepest Hole                          | -0.382                                                          |
| GooF                                  | 1.036                                                           |
| $wR_2$ (all data)                     | 0.1292                                                          |
| $wR_2$                                | 0.1096                                                          |
| $R_1$ (all data)                      | 0.0814                                                          |
| $R_1$                                 | 0.0465                                                          |

**Table S43: Structure Quality Indicators**

|                     |                                 |       |                 |      |          |       |            |       |
|---------------------|---------------------------------|-------|-----------------|------|----------|-------|------------|-------|
| <b>Reflections:</b> | d min (Mo)<br>2 $\theta$ =55.1° | 0.77  | I/ $\sigma$ (I) | 25.1 | Rint     | 5.56% | Full 50.5° | 99.9  |
| <b>Refinement:</b>  | Shift                           | 0.000 | Max Peak        | 1.0  | Min Peak | -0.4  | Goof       | 1.036 |

A clear light colourless prism-shaped crystal with dimensions 0.21 x 0.21 x 0.15 mm<sup>3</sup> was mounted on a MITIGEN holder oil. Data were collected using a Nonius APEX-II CCD diffractometer equipped with an Oxford Cryosystems low-temperature device operating at  $T = 110.0(1)$  K. Data were measured using  $\phi$  and  $\omega$  scans with Mo  $K_{\alpha 1}$  radiation. The diffraction pattern was indexed and the total number of runs, and images was based on the strategy calculation from the program **APEX4**<sup>6</sup>. The maximum resolution that was achieved was  $\theta = 27.532^\circ$  (0.77 Å). The unit cell was refined using **SAINT V8.40B**<sup>4</sup> on 6983 reflections, 16% of the observed reflections. Data reduction, scaling and absorption corrections were performed using **SAINT V8.40B**<sup>4</sup>. The final completeness is 99.90 % out to  $27.532^\circ$  in  $\theta$ . **SADABS-2016/2**<sup>5</sup> was used for absorption correction.  $wR_2(\text{int})$  was 0.0542 before and 0.0520 after correction. The Ratio of minimum to maximum transmission is 0.9504. The absorption coefficient  $\mu$  of this material is 0.120 mm<sup>-1</sup> at this wavelength ( $\lambda = 0.71073$  Å) and the minimum and maximum transmissions are 0.922 and 0.971. The structure was solved, and the space group  $P2_1/c$  (# 14) determined by the **ShelXT**<sup>1</sup> 2018/2 structure solution program using dual methods and refined by full matrix least squares minimisation on  $F^2$  using version 2018/3 of **ShelXL**<sup>3</sup> 2018/3. All non-hydrogen atoms were refined anisotropically. Hydrogen atom positions were calculated geometrically and refined using the riding model.

**Table S44: Bond Lengths in Å for compound 2b.**

| Atom | Atom | Length/Å   | Atom | Atom | Length/Å |
|------|------|------------|------|------|----------|
| Al1  | O1A  | 1.7951(14) | C1A  | C6A  | 1.385(3) |
| Al1  | O1   | 1.7984(15) | C2   | C1   | 1.405(3) |
| Al1  | N1   | 2.1200(17) | C2   | C3   | 1.390(3) |
| Al1  | N1A  | 2.1224(17) | C2A  | C3A  | 1.386(3) |
| Al1  | C12  | 1.973(2)   | C1   | C6   | 1.389(3) |
| O1A  | C2A  | 1.338(2)   | C3   | C4   | 1.392(3) |
| O1   | C2   | 1.342(2)   | C4   | C5   | 1.386(3) |
| N1   | C7   | 1.308(2)   | C6   | C5   | 1.397(3) |
| N1   | C1   | 1.420(2)   | C6A  | C5A  | 1.395(3) |
| N2   | C7   | 1.325(2)   | C5A  | C4A  | 1.381(3) |
| N2   | C8   | 1.472(2)   | C3A  | C4A  | 1.392(3) |
| N2   | C9   | 1.471(3)   | C8   | C11  | 1.523(3) |
| N2A  | C7A  | 1.319(2)   | C9A  | C10A | 1.508(3) |
| N2A  | C9A  | 1.470(3)   | C8A  | C11A | 1.525(3) |
| N2A  | C8A  | 1.471(3)   | C9   | C10  | 1.514(3) |
| N1A  | C1A  | 1.419(2)   | C11  | C10  | 1.522(3) |
| N1A  | C7A  | 1.311(2)   | C11A | C10A | 1.522(3) |
| C1A  | C2A  | 1.407(3)   |      |      |          |

**Table S45: Bond Angles in ° for compound 2b.**

| Atom | Atom | Atom | Angle/°   | Atom | Atom | Atom | Angle/°    |
|------|------|------|-----------|------|------|------|------------|
| O1A  | Al1  | O1   | 126.79(7) | N1   | Al1  | N1A  | 157.40(7)  |
| O1A  | Al1  | N1   | 89.04(6)  | C12  | Al1  | N1   | 99.90(8)   |
| O1A  | Al1  | N1A  | 82.43(6)  | C12  | Al1  | N1A  | 102.65(8)  |
| O1A  | Al1  | C12  | 116.16(8) | C2A  | O1A  | Al1  | 118.34(12) |
| O1   | Al1  | N1   | 82.30(6)  | C2   | O1   | Al1  | 116.47(12) |
| O1   | Al1  | N1A  | 86.13(6)  | C7   | N1   | Al1  | 135.20(13) |
| O1   | Al1  | C12  | 117.06(8) | C7   | N1   | C1   | 116.70(16) |

| Atom | Atom | Atom | Angle/°    | Atom | Atom | Atom | Angle/°    |
|------|------|------|------------|------|------|------|------------|
| C1   | N1   | Al1  | 106.00(12) | C2   | C1   | N1   | 113.32(17) |
| C7   | N2   | C8   | 124.97(17) | C6   | C1   | N1   | 126.61(18) |
| C7   | N2   | C9   | 122.40(17) | C6   | C1   | C2   | 119.90(18) |
| C9   | N2   | C8   | 111.03(15) | N1A  | C7A  | N2A  | 125.28(18) |
| C7A  | N2A  | C9A  | 123.07(17) | C2   | C3   | C4   | 119.84(19) |
| C7A  | N2A  | C8A  | 124.56(16) | C5   | C4   | C3   | 120.49(19) |
| C9A  | N2A  | C8A  | 111.36(15) | C1   | C6   | C5   | 119.93(19) |
| C1A  | N1A  | Al1  | 106.94(12) | C1A  | C6A  | C5A  | 119.71(19) |
| C7A  | N1A  | Al1  | 132.57(13) | C4A  | C5A  | C6A  | 120.30(19) |
| C7A  | N1A  | C1A  | 116.01(16) | C2A  | C3A  | C4A  | 120.06(19) |
| C2A  | C1A  | N1A  | 113.37(17) | C4   | C5   | C6   | 119.94(19) |
| C6A  | C1A  | N1A  | 126.55(18) | C5A  | C4A  | C3A  | 120.23(19) |
| C6A  | C1A  | C2A  | 120.04(18) | N2   | C8   | C11  | 103.57(16) |
| O1   | C2   | C1   | 117.43(17) | N2A  | C9A  | C10A | 103.28(17) |
| O1   | C2   | C3   | 122.69(18) | N2A  | C8A  | C11A | 103.70(16) |
| C3   | C2   | C1   | 119.86(18) | N2   | C9   | C10  | 103.31(17) |
| N1   | C7   | N2   | 126.10(18) | C10  | C11  | C8   | 104.14(17) |
| O1A  | C2A  | C1A  | 117.56(17) | C10A | C11A | C8A  | 105.60(18) |
| O1A  | C2A  | C3A  | 122.87(18) | C9   | C10  | C11  | 102.16(17) |
| C3A  | C2A  | C1A  | 119.57(18) | C9A  | C10A | C11A | 102.98(19) |

**Table S46:** Torsion Angles in ° for **compound 2b**.

| Atom | Atom | Atom | Atom | Angle/°     |
|------|------|------|------|-------------|
| Al1  | O1A  | C2A  | C1A  | 12.1(2)     |
| Al1  | O1A  | C2A  | C3A  | -169.21(15) |
| Al1  | O1   | C2   | C1   | 20.5(2)     |
| Al1  | O1   | C2   | C3   | -157.85(16) |
| Al1  | N1   | C7   | N2   | -34.3(3)    |
| Al1  | N1   | C1   | C2   | -9.27(18)   |
| Al1  | N1   | C1   | C6   | 165.98(17)  |
| Al1  | N1A  | C1A  | C2A  | -4.27(19)   |
| Al1  | N1A  | C1A  | C6A  | 173.53(17)  |
| Al1  | N1A  | C7A  | N2A  | -43.0(3)    |
| O1A  | Al1  | O1   | C2   | -102.78(14) |
| O1A  | C2A  | C3A  | C4A  | -175.90(18) |
| O1   | Al1  | O1A  | C2A  | -90.47(15)  |
| O1   | C2   | C1   | N1   | -5.2(2)     |
| O1   | C2   | C1   | C6   | 179.25(17)  |
| O1   | C2   | C3   | C4   | -179.68(18) |
| N1   | Al1  | O1A  | C2A  | -170.11(13) |
| N1   | Al1  | O1   | C2   | -19.79(13)  |
| N1   | C1   | C6   | C5   | -174.20(18) |
| N2   | C8   | C11  | C10  | 27.0(2)     |
| N2   | C9   | C10  | C11  | 36.0(2)     |
| N2A  | C9A  | C10A | C11A | 34.9(2)     |
| N2A  | C8A  | C11A | C10A | 19.4(2)     |
| N1A  | Al1  | O1A  | C2A  | -11.10(13)  |
| N1A  | Al1  | O1   | C2   | 179.66(14)  |
| N1A  | C1A  | C2A  | O1A  | -3.8(2)     |
| N1A  | C1A  | C2A  | C3A  | 177.38(17)  |
| N1A  | C1A  | C6A  | C5A  | -179.65(19) |
| C1A  | N1A  | C7A  | N2A  | 164.31(18)  |
| C1A  | C2A  | C3A  | C4A  | 2.8(3)      |
| C1A  | C6A  | C5A  | C4A  | 2.3(3)      |
| C2   | C1   | C6   | C5   | 0.8(3)      |
| C2   | C3   | C4   | C5   | -0.1(3)     |
| C7   | N1   | C1   | C2   | 156.79(17)  |
| C7   | N1   | C1   | C6   | -28.0(3)    |

| Atom | Atom | Atom | Atom | Angle/°     |
|------|------|------|------|-------------|
| C7   | N2   | C8   | C11  | -170.13(18) |
| C7   | N2   | C9   | C10  | 146.14(19)  |
| C2A  | C1A  | C6A  | C5A  | -2.0(3)     |
| C2A  | C3A  | C4A  | C5A  | -2.5(3)     |
| C1   | N1   | C7   | N2   | 164.86(18)  |
| C1   | C2   | C3   | C4   | 2.0(3)      |
| C1   | C6   | C5   | C4   | 1.2(3)      |
| C7A  | N2A  | C9A  | C10A | 144.8(2)    |
| C7A  | N2A  | C8A  | C11A | -165.85(19) |
| C7A  | N1A  | C1A  | C2A  | 155.02(17)  |
| C7A  | N1A  | C1A  | C6A  | -27.2(3)    |
| C3   | C2   | C1   | N1   | 173.25(17)  |
| C3   | C2   | C1   | C6   | -2.4(3)     |
| C3   | C4   | C5   | C6   | -1.5(3)     |
| C6A  | C1A  | C2A  | O1A  | 178.20(17)  |
| C6A  | C1A  | C2A  | C3A  | -0.6(3)     |
| C6A  | C5A  | C4A  | C3A  | -0.1(3)     |
| C8   | N2   | C7   | N1   | -15.5(3)    |
| C8   | N2   | C9   | C10  | -20.1(2)    |
| C8   | C11  | C10  | C9   | -39.3(2)    |
| C9A  | N2A  | C7A  | N1A  | 179.63(18)  |
| C9A  | N2A  | C8A  | C11A | 2.9(2)      |
| C8A  | N2A  | C7A  | N1A  | -12.9(3)    |
| C8A  | N2A  | C9A  | C10A | -24.1(2)    |
| C8A  | C11A | C10A | C9A  | -34.0(2)    |
| C9   | N2   | C7   | N1   | -179.77(19) |
| C9   | N2   | C8   | C11  | -4.3(2)     |
| C12  | Al1  | O1A  | C2A  | 89.32(15)   |
| C12  | Al1  | O1   | C2   | 77.43(15)   |

## Crystal Data and Experimental

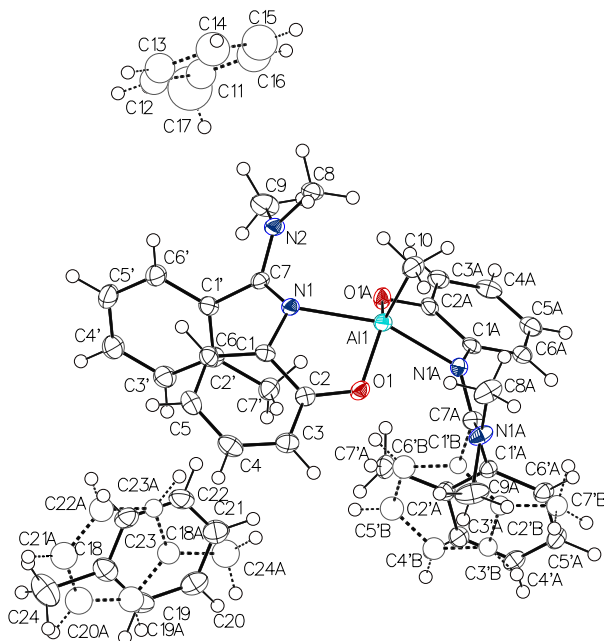

**Figure S129:** ORTEP view of compound **3b**

**Experimental.** Single clear light colourless prism-shaped crystals of **compound 3b** recrystallised from toluene by slow evaporation. A suitable crystal with dimensions 0.42 x 0.34 x 0.33 mm<sup>3</sup> was selected and mounted on a MITIGEN holder oil on a Bruker D8 Venture diffractometer. The crystal was kept at a steady  $T = 120.0(1)$  K during data collection. The structure was solved with the **ShelXT**<sup>1</sup> solution program using dual methods and by using **Olex2**<sup>2</sup> 1.5 as the graphical interface. The model was refined with **ShelXL**<sup>3</sup> 2018/3 using full matrix least squares minimisation on **F<sup>2</sup>**.

**Crystal Data.** C<sub>87</sub>H<sub>98</sub>Al<sub>2</sub>N<sub>8</sub>O<sub>4</sub>,  $M_r = 1373.69$ , triclinic,  $P-1$  (No. 2),  $a = 12.4063(12)$  Å,  $b = 13.7450(12)$  Å,  $c = 14.0446(13)$  Å,  $\alpha = 110.884(3)^\circ$ ,  $\beta = 110.057(3)^\circ$ ,  $\gamma = 104.529(4)^\circ$ ,  $V = 1902.5(3)$  Å<sup>3</sup>,  $T = 120.0(1)$  K,  $Z = 1$ ,  $Z' = 0.5$ ,  $\mu(\text{MoK}\alpha) = 0.095$ , 90466 reflections measured, 8806 unique ( $R_{\text{int}} = 0.0689$ ) which were used in all calculations.

The final  $wR_2$  was 0.1547 (all data) and  $R_1$  was 0.0581 ( $I \geq 2 \sigma(I)$ ).

**Table S47: Experimental parameters**

| Compound                              | <b>3b</b>                                                                     |
|---------------------------------------|-------------------------------------------------------------------------------|
| CCDC                                  | <b>2182078</b>                                                                |
| Formula                               | C <sub>87</sub> H <sub>98</sub> Al <sub>2</sub> N <sub>8</sub> O <sub>4</sub> |
| $D_{\text{calc.}} / \text{g cm}^{-3}$ | 1.199                                                                         |
| $\mu / \text{mm}^{-1}$                | 0.095                                                                         |
| Formula Weight                        | 1373.69                                                                       |
| Colour                                | clear light colourless                                                        |
| Shape                                 | prism-shaped                                                                  |
| Size/mm <sup>3</sup>                  | 0.42x0.34x0.33                                                                |
| $T/\text{K}$                          | 120.0(1)                                                                      |
| Crystal System                        | triclinic                                                                     |
| Space Group                           | $P-1$                                                                         |
| $a/\text{Å}$                          | 12.4063(12)                                                                   |
| $b/\text{Å}$                          | 13.7450(12)                                                                   |
| $c/\text{Å}$                          | 14.0446(13)                                                                   |
| $\alpha/^\circ$                       | 110.884(3)                                                                    |
| $\beta/^\circ$                        | 110.057(3)                                                                    |
| $\gamma/^\circ$                       | 104.529(4)                                                                    |
| $V/\text{Å}^3$                        | 1902.5(3)                                                                     |
| $Z$                                   | 1                                                                             |
| $Z'$                                  | 0.5                                                                           |
| Wavelength/Å                          | 0.71073                                                                       |
| Radiation type                        | MoK $\alpha$                                                                  |
| $\theta_{\text{min}}/^\circ$          | 2.554                                                                         |
| $\theta_{\text{max}}/^\circ$          | 27.606                                                                        |
| Measured Refl's.                      | 90466                                                                         |
| Indep't Refl's                        | 8806                                                                          |
| Refl's $I \geq 2 \sigma(I)$           | 6546                                                                          |
| $R_{\text{int}}$                      | 0.0689                                                                        |
| Parameters                            | 461                                                                           |
| Restraints                            | 0                                                                             |
| Largest Peak                          | 0.906                                                                         |
| Deepest Hole                          | -0.551                                                                        |
| GooF                                  | 1.025                                                                         |
| $wR_2$ (all data)                     | 0.1547                                                                        |
| $wR_2$                                | 0.1340                                                                        |
| $R_1$ (all data)                      | 0.0858                                                                        |
| $R_1$                                 | 0.0581                                                                        |

**Table S48: Structure Quality Indicators**

|                     |                                 |        |                 |      |          |       |            |       |
|---------------------|---------------------------------|--------|-----------------|------|----------|-------|------------|-------|
| <b>Reflections:</b> | d min (Mo)<br>2 $\theta$ =55.2° | 0.77   | I/ $\sigma$ (I) | 31.1 | Rint     | 6.89% | Full 50.5° | 99.9  |
| <b>Refinement:</b>  | Shift                           | -0.001 | Max Peak        | 0.9  | Min Peak | -0.6  | Goof       | 1.025 |

A clear light colourless prism-shaped crystal with dimensions 0.42 x 0.34 x 0.33 mm<sup>3</sup> was mounted on a MITIGEN holder oil. Data were collected using a Bruker D8 Venture diffractometer equipped with an Oxford Cryosystems low-temperature device operating at  $T = 120.0(1)$  K. Data were measured using  $\phi$  and  $\omega$  scans with MoK $\alpha$  radiation. The maximum resolution that was achieved was  $\theta = 27.606^\circ$  (0.77 Å). The unit cell was refined using **SAINT V8.40B**<sup>4</sup> on 9955 reflections, 11% of the observed reflections. Data reduction, scaling and absorption corrections were performed using **SAINT V8.40B**<sup>4</sup>. The final completeness is 99.90 % out to 27.606° in  $\theta$ . **SADABS-2016/2**<sup>5</sup> was used for absorption correction.  $wR_2(\text{int})$  was 0.0628 before and 0.0576 after correction. The Ratio of minimum to maximum transmission is 0.9397. The absorption coefficient  $\mu$  of this material is 0.095 mm<sup>-1</sup> at this wavelength ( $\lambda = 0.71073\text{Å}$ ) and the minimum and maximum transmissions are 0.912 and 0.971. The structure was solved, and the space group  $P-1$  (# 2) determined by the **ShelXT**<sup>1</sup> structure solution program using dual methods and refined by full matrix least squares minimisation on  $F^2$  using version 2018/3 of **ShelXL**<sup>3</sup>. All non-hydrogen atoms were refined anisotropically, excepted minor disordered parts. Hydrogen atom positions were calculated geometrically and refined using the riding model. The value of  $Z'$  is 0.5. This means that only half of the formula unit is present in the asymmetric unit, with the other half consisting of symmetry equivalent atoms.

**Table S49: Bond Lengths in Å for compound 3b.**

| Atom | Atom | Length/Å   | Atom | Atom | Length/Å  |
|------|------|------------|------|------|-----------|
| Al1  | O1   | 1.7940(15) | C5'A | C6'A | 1.3900    |
| Al1  | O1A  | 1.7969(15) | C1'B | C6'B | 1.3900    |
| Al1  | N1   | 2.1703(17) | C1'B | C2'B | 1.3900    |
| Al1  | N1A  | 2.1555(17) | C1'B | C7A  | 1.503(4)  |
| Al1  | C10  | 1.970(2)   | C6'B | C5'B | 1.3900    |
| O1   | C2   | 1.340(2)   | C5'B | C4'B | 1.3900    |
| O1A  | C2A  | 1.341(2)   | C4'B | C3'B | 1.3900    |
| N1   | C1   | 1.418(2)   | C3'B | C2'B | 1.3900    |
| N1   | C7   | 1.321(2)   | C2'B | C7'B | 1.486(11) |
| N1A  | C1A  | 1.415(2)   | C1A  | C2A  | 1.411(3)  |
| N1A  | C7A  | 1.319(3)   | C1A  | C6A  | 1.389(3)  |
| N2   | C7   | 1.342(2)   | C2   | C3   | 1.390(3)  |
| N2   | C8   | 1.455(3)   | C2'  | C3'  | 1.399(3)  |
| N2   | C9   | 1.459(3)   | C2'  | C7'  | 1.486(3)  |
| N2A  | C7A  | 1.337(3)   | C2A  | C3A  | 1.392(3)  |
| N2A  | C8A  | 1.456(3)   | C3   | C4   | 1.388(3)  |
| N2A  | C9A  | 1.455(3)   | C3'  | C4'  | 1.376(3)  |
| C1   | C2   | 1.409(3)   | C3A  | C4A  | 1.389(3)  |
| C1   | C6   | 1.389(3)   | C4   | C5   | 1.386(3)  |
| C1'  | C2'  | 1.394(3)   | C4'  | C5'  | 1.385(3)  |
| C1'  | C6'  | 1.409(3)   | C4A  | C5A  | 1.389(3)  |
| C1'  | C7   | 1.502(3)   | C5   | C6   | 1.391(3)  |
| C1'A | C2'A | 1.3900     | C5'  | C6'  | 1.385(3)  |
| C1'A | C6'A | 1.3900     | C5A  | C6A  | 1.389(3)  |
| C1'A | C7A  | 1.530(2)   | C14  | C13  | 1.3900    |
| C2'A | C3'A | 1.3900     | C14  | C15  | 1.3900    |
| C2'A | C7'A | 1.513(4)   | C13  | C12  | 1.3900    |
| C3'A | C4'A | 1.3900     | C12  | C11  | 1.3900    |
| C4'A | C5'A | 1.3900     | C11  | C16  | 1.3900    |

| Atom | Atom | Length/Å  |
|------|------|-----------|
| C11  | C17  | 1.486(12) |
| C16  | C15  | 1.3900    |
| C24  | C18  | 1.510(4)  |
| C24A | C18A | 1.501(15) |
| C21  | C22  | 1.3900    |
| C21  | C20  | 1.3900    |
| C22  | C23  | 1.3900    |
| C23  | C18  | 1.3900    |

| Atom | Atom | Length/Å |
|------|------|----------|
| C18  | C19  | 1.3900   |
| C19  | C20  | 1.3900   |
| C19A | C18A | 1.3900   |
| C19A | C20A | 1.3900   |
| C18A | C23A | 1.3900   |
| C23A | C22A | 1.3900   |
| C22A | C21A | 1.3900   |
| C21A | C20A | 1.3900   |

**Table S50:** Bond Angles in ° for **compound 3b**.

| Atom | Atom | Atom | Angle/°    |
|------|------|------|------------|
| O1   | Al1  | O1A  | 128.60(7)  |
| O1   | Al1  | N1   | 81.42(6)   |
| O1   | Al1  | N1A  | 86.33(7)   |
| O1   | Al1  | C10  | 115.64(9)  |
| O1A  | Al1  | N1   | 87.10(7)   |
| O1A  | Al1  | N1A  | 81.66(7)   |
| O1A  | Al1  | C10  | 115.76(9)  |
| N1A  | Al1  | N1   | 152.73(7)  |
| C10  | Al1  | N1   | 103.55(8)  |
| C10  | Al1  | N1A  | 103.71(8)  |
| C2   | O1   | Al1  | 119.16(12) |
| C2A  | O1A  | Al1  | 118.55(12) |
| C1   | N1   | Al1  | 106.41(12) |
| C7   | N1   | Al1  | 126.19(13) |
| C7   | N1   | C1   | 119.65(16) |
| C1A  | N1A  | Al1  | 106.77(12) |
| C7A  | N1A  | Al1  | 125.44(14) |
| C7A  | N1A  | C1A  | 119.85(17) |
| C7   | N2   | C8   | 121.42(17) |
| C7   | N2   | C9   | 122.64(18) |
| C8   | N2   | C9   | 114.51(17) |
| C7A  | N2A  | C8A  | 121.00(18) |
| C7A  | N2A  | C9A  | 123.46(18) |
| C9A  | N2A  | C8A  | 114.54(18) |
| C2   | C1   | N1   | 113.37(17) |
| C6   | C1   | N1   | 126.69(18) |
| C6   | C1   | C2   | 119.65(18) |
| C2'  | C1'  | C6'  | 120.36(19) |
| C2'  | C1'  | C7   | 120.89(18) |
| C6'  | C1'  | C7   | 118.66(18) |
| C2'A | C1'A | C6'A | 120.0      |
| C2'A | C1'A | C7A  | 119.80(13) |
| C6'A | C1'A | C7A  | 120.13(13) |
| C1'A | C2'A | C7'A | 120.89(16) |
| C3'A | C2'A | C1'A | 120.0      |
| C3'A | C2'A | C7'A | 119.09(16) |
| C2'A | C3'A | C4'A | 120.0      |
| C3'A | C4'A | C5'A | 120.0      |
| C6'A | C5'A | C4'A | 120.0      |
| C5'A | C6'A | C1'A | 120.0      |
| C6'B | C1'B | C2'B | 120.0      |
| C6'B | C1'B | C7A  | 121.7(4)   |
| C2'B | C1'B | C7A  | 118.3(4)   |
| C1'B | C6'B | C5'B | 120.0      |
| C4'B | C5'B | C6'B | 120.0      |
| C5'B | C4'B | C3'B | 120.0      |
| C2'B | C3'B | C4'B | 120.0      |

| Atom | Atom | Atom | Angle/°    |
|------|------|------|------------|
| C1'B | C2'B | C7'B | 120.3(6)   |
| C3'B | C2'B | C1'B | 120.0      |
| C3'B | C2'B | C7'B | 119.7(5)   |
| C2A  | C1A  | N1A  | 113.18(17) |
| C6A  | C1A  | N1A  | 126.50(18) |
| C6A  | C1A  | C2A  | 119.96(18) |
| O1   | C2   | C1   | 117.84(17) |
| O1   | C2   | C3   | 122.66(18) |
| C3   | C2   | C1   | 119.50(18) |
| C1'  | C2'  | C3'  | 118.1(2)   |
| C1'  | C2'  | C7'  | 121.57(19) |
| C3'  | C2'  | C7'  | 120.33(19) |
| O1A  | C2A  | C1A  | 117.80(17) |
| O1A  | C2A  | C3A  | 122.83(18) |
| C3A  | C2A  | C1A  | 119.37(19) |
| C4   | C3   | C2   | 120.2(2)   |
| C4'  | C3'  | C2'  | 121.4(2)   |
| C4A  | C3A  | C2A  | 120.04(19) |
| C5   | C4   | C3   | 120.4(2)   |
| C3'  | C4'  | C5'  | 120.7(2)   |
| C3A  | C4A  | C5A  | 120.50(19) |
| C4   | C5   | C6   | 119.9(2)   |
| C6'  | C5'  | C4'  | 119.3(2)   |
| C4A  | C5A  | C6A  | 120.0(2)   |
| C1   | C6   | C5   | 120.30(19) |
| C5'  | C6'  | C1'  | 120.2(2)   |
| C1A  | C6A  | C5A  | 120.11(19) |
| N1   | C7   | N2   | 119.64(17) |
| N1   | C7   | C1'  | 125.00(17) |
| N2   | C7   | C1'  | 115.35(17) |
| N1A  | C7A  | N2A  | 120.08(18) |
| N1A  | C7A  | C1'A | 126.38(17) |
| N1A  | C7A  | C1'B | 115.4(3)   |
| N2A  | C7A  | C1'A | 113.26(17) |
| N2A  | C7A  | C1'B | 120.6(3)   |
| C13  | C14  | C15  | 120.0      |
| C12  | C13  | C14  | 120.0      |
| C13  | C12  | C11  | 120.0      |
| C12  | C11  | C17  | 115.6(6)   |
| C16  | C11  | C12  | 120.0      |
| C16  | C11  | C17  | 124.4(6)   |
| C15  | C16  | C11  | 120.0      |
| C16  | C15  | C14  | 120.0      |
| C22  | C21  | C20  | 120.0      |
| C21  | C22  | C23  | 120.0      |
| C18  | C23  | C22  | 120.0      |
| C23  | C18  | C24  | 120.4(2)   |



| Atom | Atom | Atom | Angle/°  | Atom | Atom | Atom | Angle/°  |
|------|------|------|----------|------|------|------|----------|
| C23  | C18  | C19  | 120.0    | C19A | C18A | C23A | 120.0    |
| C19  | C18  | C24  | 119.6(2) | C23A | C18A | C24A | 121.2(8) |
| C18  | C19  | C20  | 120.0    | C22A | C23A | C18A | 120.0    |
| C19  | C20  | C21  | 120.0    | C23A | C22A | C21A | 120.0    |
| C18A | C19A | C20A | 120.0    | C20A | C21A | C22A | 120.0    |
| C19A | C18A | C24A | 118.7(8) | C21A | C20A | C19A | 120.0    |

**Table S51:** Torsion Angles in ° for **compound 3b**.

| Atom | Atom | Atom | Atom | Angle/°     |
|------|------|------|------|-------------|
| Al1  | O1   | C2   | C1   | 13.4(2)     |
| Al1  | O1   | C2   | C3   | -166.58(15) |
| Al1  | O1A  | C2A  | C1A  | 14.8(2)     |
| Al1  | O1A  | C2A  | C3A  | -165.81(15) |
| Al1  | N1   | C1   | C2   | -5.77(18)   |
| Al1  | N1   | C1   | C6   | 167.95(16)  |
| Al1  | N1   | C7   | N2   | -56.9(2)    |
| Al1  | N1   | C7   | C1'  | 124.14(18)  |
| Al1  | N1A  | C1A  | C2A  | -5.14(18)   |
| Al1  | N1A  | C1A  | C6A  | 167.89(16)  |
| Al1  | N1A  | C7A  | N2A  | -59.0(2)    |
| Al1  | N1A  | C7A  | C1'A | 127.59(18)  |
| Al1  | N1A  | C7A  | C1'B | 98.7(3)     |
| O1   | Al1  | O1A  | C2A  | -91.96(15)  |
| O1   | C2   | C3   | C4   | 178.14(19)  |
| O1A  | Al1  | O1   | C2   | -91.97(15)  |
| O1A  | C2A  | C3A  | C4A  | 179.09(18)  |
| N1   | Al1  | O1   | C2   | -12.68(14)  |
| N1   | Al1  | O1A  | C2A  | -168.58(14) |
| N1   | C1   | C2   | O1   | -3.3(2)     |
| N1   | C1   | C2   | C3   | 176.67(17)  |
| N1   | C1   | C6   | C5   | -175.09(18) |
| N1A  | Al1  | O1   | C2   | -168.25(14) |
| N1A  | Al1  | O1A  | C2A  | -13.49(14)  |
| N1A  | C1A  | C2A  | O1A  | -4.7(2)     |
| N1A  | C1A  | C2A  | C3A  | 175.92(17)  |
| N1A  | C1A  | C6A  | C5A  | -174.36(18) |
| C1   | N1   | C7   | N2   | 158.12(18)  |
| C1   | N1   | C7   | C1'  | -20.9(3)    |
| C1   | C2   | C3   | C4   | -1.8(3)     |
| C1'  | C2'  | C3'  | C4'  | 0.0(3)      |
| C1'A | C2'A | C3'A | C4'A | 0.0         |
| C2'A | C1'A | C6'A | C5'A | 0.0         |
| C2'A | C1'A | C7A  | N1A  | -67.6(2)    |
| C2'A | C1'A | C7A  | N2A  | 118.55(17)  |
| C2'A | C3'A | C4'A | C5'A | 0.0         |
| C3'A | C4'A | C5'A | C6'A | 0.0         |
| C4'A | C5'A | C6'A | C1'A | 0.0         |
| C6'A | C1'A | C2'A | C3'A | 0.0         |
| C6'A | C1'A | C2'A | C7'A | 178.8(2)    |
| C6'A | C1'A | C7A  | N1A  | 115.5(2)    |
| C6'A | C1'A | C7A  | N2A  | -58.4(2)    |
| C1'B | C6'B | C5'B | C4'B | 0.0         |
| C6'B | C1'B | C2'B | C3'B | 0.0         |
| C6'B | C1'B | C2'B | C7'B | -177.1(7)   |
| C6'B | C1'B | C7A  | N1A  | -46.6(4)    |
| C6'B | C1'B | C7A  | N2A  | 111.0(4)    |
| C6'B | C5'B | C4'B | C3'B | 0.0         |
| C5'B | C4'B | C3'B | C2'B | 0.0         |

| Atom | Atom | Atom | Atom | Angle/°     |
|------|------|------|------|-------------|
| C4'B | C3'B | C2'B | C1'B | 0.0         |
| C4'B | C3'B | C2'B | C7'B | 177.1(7)    |
| C2'B | C1'B | C6'B | C5'B | 0.0         |
| C2'B | C1'B | C7A  | N1A  | 132.4(3)    |
| C2'B | C1'B | C7A  | N2A  | -70.0(4)    |
| C1A  | N1A  | C7A  | N2A  | 156.29(18)  |
| C1A  | N1A  | C7A  | C1'A | -17.2(3)    |
| C1A  | N1A  | C7A  | C1'B | -46.0(3)    |
| C1A  | C2A  | C3A  | C4A  | -1.6(3)     |
| C2   | C1   | C6   | C5   | -1.7(3)     |
| C2   | C3   | C4   | C5   | 0.4(3)      |
| C2'  | C1'  | C6'  | C5'  | 1.1(3)      |
| C2'  | C1'  | C7   | N1   | -59.4(3)    |
| C2'  | C1'  | C7   | N2   | 121.6(2)    |
| C2'  | C3'  | C4'  | C5'  | -0.3(4)     |
| C2A  | C1A  | C6A  | C5A  | -1.8(3)     |
| C2A  | C3A  | C4A  | C5A  | 0.1(3)      |
| C3   | C4   | C5   | C6   | 0.4(3)      |
| C3'  | C4'  | C5'  | C6'  | 0.9(4)      |
| C3A  | C4A  | C5A  | C6A  | 0.5(3)      |
| C4   | C5   | C6   | C1   | 0.3(3)      |
| C4'  | C5'  | C6'  | C1'  | -1.3(4)     |
| C4A  | C5A  | C6A  | C1A  | 0.3(3)      |
| C6   | C1   | C2   | O1   | -177.47(17) |
| C6   | C1   | C2   | C3   | 2.5(3)      |
| C6'  | C1'  | C2'  | C3'  | -0.5(3)     |
| C6'  | C1'  | C2'  | C7'  | 177.5(2)    |
| C6'  | C1'  | C7   | N1   | 124.1(2)    |
| C6'  | C1'  | C7   | N2   | -54.9(3)    |
| C6A  | C1A  | C2A  | O1A  | -178.24(17) |
| C6A  | C1A  | C2A  | C3A  | 2.4(3)      |
| C7   | N1   | C1   | C2   | 145.40(18)  |
| C7   | N1   | C1   | C6   | -40.9(3)    |
| C7   | C1'  | C2'  | C3'  | -176.93(19) |
| C7   | C1'  | C2'  | C7'  | 1.1(3)      |
| C7   | C1'  | C6'  | C5'  | 177.7(2)    |
| C7'  | C2'  | C3'  | C4'  | -178.0(2)   |
| C7'A | C2'A | C3'A | C4'A | -178.8(2)   |
| C7A  | N1A  | C1A  | C2A  | 145.45(18)  |
| C7A  | N1A  | C1A  | C6A  | -41.5(3)    |
| C7A  | C1'A | C2'A | C3'A | -176.93(17) |
| C7A  | C1'A | C2'A | C7'A | 1.9(2)      |
| C7A  | C1'A | C6'A | C5'A | 176.92(17)  |
| C7A  | C1'B | C6'B | C5'B | 179.1(5)    |
| C7A  | C1'B | C2'B | C3'B | -179.1(5)   |
| C7A  | C1'B | C2'B | C7'B | 3.8(7)      |
| C8   | N2   | C7   | N1   | -15.6(3)    |
| C8   | N2   | C7   | C1'  | 163.53(18)  |
| C8A  | N2A  | C7A  | N1A  | -15.3(3)    |
| C8A  | N2A  | C7A  | C1'A | 158.99(19)  |
| C8A  | N2A  | C7A  | C1'B | -171.8(3)   |
| C9   | N2   | C7   | N1   | 150.0(2)    |
| C9   | N2   | C7   | C1'  | -30.9(3)    |
| C9A  | N2A  | C7A  | N1A  | 152.7(2)    |
| C9A  | N2A  | C7A  | C1'A | -33.0(3)    |
| C9A  | N2A  | C7A  | C1'B | -3.8(4)     |
| C10  | Al1  | O1   | C2   | 88.30(16)   |
| C10  | Al1  | O1A  | C2A  | 87.77(16)   |
| C14  | C13  | C12  | C11  | 0.0         |
| C13  | C14  | C15  | C16  | 0.0         |

| Atom | Atom | Atom | Atom | Angle/°   |
|------|------|------|------|-----------|
| C13  | C12  | C11  | C16  | 0.0       |
| C13  | C12  | C11  | C17  | -180.0(9) |
| C12  | C11  | C16  | C15  | 0.0       |
| C11  | C16  | C15  | C14  | 0.0       |
| C15  | C14  | C13  | C12  | 0.0       |
| C17  | C11  | C16  | C15  | 180.0(10) |
| C24  | C18  | C19  | C20  | 179.7(2)  |
| C24A | C18A | C23A | C22A | -178.1(9) |
| C21  | C22  | C23  | C18  | 0.0       |
| C22  | C21  | C20  | C19  | 0.0       |
| C22  | C23  | C18  | C24  | -179.7(3) |
| C22  | C23  | C18  | C19  | 0.0       |
| C23  | C18  | C19  | C20  | 0.0       |
| C18  | C19  | C20  | C21  | 0.0       |
| C20  | C21  | C22  | C23  | 0.0       |
| C19A | C18A | C23A | C22A | 0.0       |
| C18A | C19A | C20A | C21A | 0.0       |
| C18A | C23A | C22A | C21A | 0.0       |
| C23A | C22A | C21A | C20A | 0.0       |
| C22A | C21A | C20A | C19A | 0.0       |
| C20A | C19A | C18A | C24A | 178.2(9)  |
| C20A | C19A | C18A | C23A | 0.0       |

**Table S52:** Atomic Occupancies for all atoms that are not fully occupied in **compound 3b**.

| Atom | Occupancy | Atom | Occupancy | Atom | Occupancy | Atom | Occupancy |
|------|-----------|------|-----------|------|-----------|------|-----------|
| C1'A | 0.760(4)  | C2'B | 0.240(4)  | H15  | 0.5       | C18  | 0.793(4)  |
| C2'A | 0.760(4)  | C7'A | 0.760(4)  | C17  | 0.5       | C19  | 0.793(4)  |
| C3'A | 0.760(4)  | H7'D | 0.760(4)  | H17A | 0.5       | H19  | 0.793(4)  |
| H3'A | 0.760(4)  | H7'E | 0.760(4)  | H17B | 0.5       | C20  | 0.793(4)  |
| C4'A | 0.760(4)  | H7'F | 0.760(4)  | H17C | 0.5       | H20  | 0.793(4)  |
| H4'A | 0.760(4)  | C7'B | 0.240(4)  | C24  | 0.793(4)  | C19A | 0.207(4)  |
| C5'A | 0.760(4)  | H7'G | 0.240(4)  | H24A | 0.793(4)  | H19A | 0.207(4)  |
| H5'A | 0.760(4)  | H7'H | 0.240(4)  | H24B | 0.793(4)  | C18A | 0.207(4)  |
| C6'A | 0.760(4)  | H7'I | 0.240(4)  | H24C | 0.793(4)  | C23A | 0.207(4)  |
| H6'A | 0.760(4)  | C14  | 0.5       | C24A | 0.207(4)  | H23A | 0.207(4)  |
| C1'B | 0.240(4)  | H14  | 0.5       | H24D | 0.207(4)  | C22A | 0.207(4)  |
| C6'B | 0.240(4)  | C13  | 0.5       | H24E | 0.207(4)  | H22A | 0.207(4)  |
| H6'B | 0.240(4)  | H13  | 0.5       | H24F | 0.207(4)  | C21A | 0.207(4)  |
| C5'B | 0.240(4)  | C12  | 0.5       | C21  | 0.793(4)  | H21A | 0.207(4)  |
| H5'B | 0.240(4)  | H12  | 0.5       | H21  | 0.793(4)  | C20A | 0.207(4)  |
| C4'B | 0.240(4)  | C11  | 0.5       | C22  | 0.793(4)  | H20A | 0.207(4)  |
| H4'B | 0.240(4)  | C16  | 0.5       | H22  | 0.793(4)  |      |           |
| C3'B | 0.240(4)  | H16  | 0.5       | C23  | 0.793(4)  |      |           |
| H3'B | 0.240(4)  | C15  | 0.5       | H23  | 0.793(4)  |      |           |

# Compound 1c

$R_1=3.31\%$

## Crystal Data and Experimental

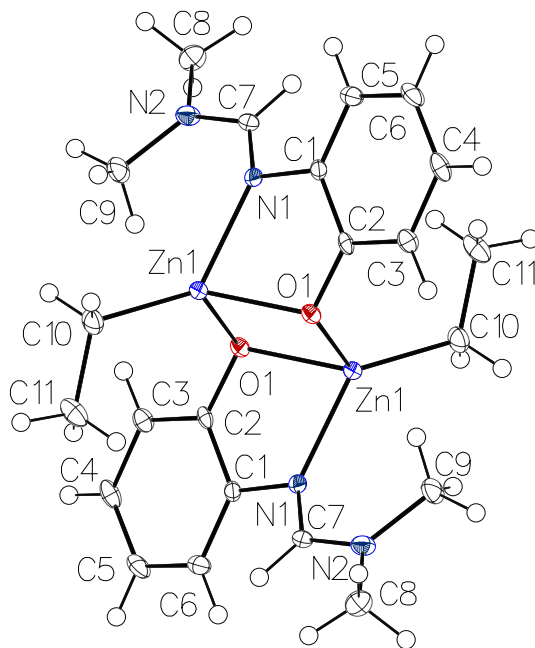

Figure S130: ORTEP view of compound 1c

**Experimental.** Single clear light colorless plate crystals of **compound 1c** recrystallized from DCM by slow evaporation. A suitable crystal with dimensions 0.18 x 0.11 x 0.10 mm<sup>3</sup> was selected and mounted on a MITIGEN holder oil on a Bruker D8 VENTURE diffractometer. The crystal was kept at a steady  $T = 100.0(1)$  K during data collection. The structure was solved with the **ShelXT**<sup>1</sup> solution program using dual methods and by using Olex2<sup>2</sup> as the graphical interface. The model was refined with **ShelXL**<sup>3</sup> 2018/3 using full matrix least squares minimization on  $F^2$ .

**Crystal Data.** C<sub>22</sub>H<sub>32</sub>N<sub>4</sub>O<sub>2</sub>Zn<sub>2</sub>,  $M_r = 515.25$ , orthorhombic, *Cmce* (No. 64),  $a = 10.3231(6)$  Å,  $b = 14.4461(9)$  Å,  $c = 15.2624(10)$  Å,  $\alpha = \beta = \gamma = 90^\circ$ ,  $V = 2276.1(2)$  Å<sup>3</sup>,  $T = 100.0(1)$  K,  $Z = 4$ ,  $Z' = 0.25$ ,  $\mu(\text{Mo } K\alpha_1) = 2.133$ , 19802 reflections measured, 1888 unique ( $R_{\text{int}} = 0.0684$ ) which were used in all calculations. The final  $wR_2$  was 0.0579 (all data) and  $R_1$  was 0.0331 ( $I \geq 2 \sigma(I)$ ).

Table S53: Experimental parameters

| Compound                              | 1c                                                                            |
|---------------------------------------|-------------------------------------------------------------------------------|
| CCDC                                  | 2182079                                                                       |
| Formula                               | C <sub>22</sub> H <sub>32</sub> N <sub>4</sub> O <sub>2</sub> Zn <sub>2</sub> |
| $D_{\text{calc.}} / \text{g cm}^{-3}$ | 1.504                                                                         |
| $\mu / \text{mm}^{-1}$                | 2.133                                                                         |
| Formula Weight                        | 515.25                                                                        |
| Color                                 | clear light colorless                                                         |
| Shape                                 | plate                                                                         |
| Size/mm <sup>3</sup>                  | 0.18x0.11x0.10                                                                |
| $T/\text{K}$                          | 100.0(1)                                                                      |
| Crystal System                        | orthorhombic                                                                  |
| Space Group                           | <i>Cmce</i>                                                                   |
| $a/\text{Å}$                          | 10.3231(6)                                                                    |
| $b/\text{Å}$                          | 14.4461(9)                                                                    |
| $c/\text{Å}$                          | 15.2624(10)                                                                   |
| $\alpha/^\circ$                       | 90                                                                            |
| $\beta/^\circ$                        | 90                                                                            |
| $\gamma/^\circ$                       | 90                                                                            |
| $V/\text{Å}^3$                        | 2276.1(2)                                                                     |
| $Z$                                   | 4                                                                             |
| $Z'$                                  | 0.25                                                                          |
| Wavelength/Å                          | 0.71073                                                                       |
| Radiation type                        | Mo $K\alpha_1$                                                                |
| $\theta_{\text{min}}/^\circ$          | 2.669                                                                         |
| $\theta_{\text{max}}/^\circ$          | 31.580                                                                        |
| Measured Refl's.                      | 19802                                                                         |
| Indep't Refl's                        | 1888                                                                          |
| Refl's $I \geq 2 \sigma(I)$           | 1456                                                                          |
| $R_{\text{int}}$                      | 0.0684                                                                        |
| Parameters                            | 136                                                                           |
| Restraints                            | 0                                                                             |
| Largest Peak                          | 0.511                                                                         |
| Deepest Hole                          | -0.611                                                                        |
| GooF                                  | 1.056                                                                         |
| $wR_2$ (all data)                     | 0.0579                                                                        |
| $wR_2$                                | 0.0511                                                                        |
| $R_1$ (all data)                      | 0.0620                                                                        |
| $R_1$                                 | 0.0331                                                                        |

**Table S54: Structure Quality Indicators**

|                     |            |       |               |      |                  |       |          |       |
|---------------------|------------|-------|---------------|------|------------------|-------|----------|-------|
| <b>Reflections:</b> | d min (Mo) | 0.68  | $I/\sigma(I)$ | 22.8 | R <sub>int</sub> | 6.84% | complete | 100%  |
| <b>Refinement:</b>  | Shift      | 0.000 | Max Peak      | 0.5  | Min Peak         | -0.6  | Goof     | 1.056 |

A clear light colorless plate-shaped crystal with dimensions 0.18 x 0.11 x 0.10 mm<sup>3</sup> was mounted on a MITIGEN holder oil. Data were collected using a Bruker D8 VENTURE diffractometer equipped with an Oxford Cryosystems low-temperature device operating at  $T = 100.0(1)$  K. Data were measured using  $\phi$  and  $\omega$  scans' using Mo  $K_{\alpha 1}$  radiation. The diffraction pattern was indexed and the total number of runs, and images was based on the strategy calculation from the program **APEX3**<sup>7</sup>. The maximum resolution that was achieved was  $\theta = 31.580^\circ$  (0.68 Å). The diffraction pattern was indexed and the total number of runs, and images was based on the strategy calculation from the program **APEX3**<sup>7</sup>. The unit cell was refined using **SAINT V8.40A**<sup>8</sup> on 6420 reflections, 32% of the observed reflections. Data reduction, scaling and absorption corrections were performed using **SAINT V8.40A**<sup>8</sup>, The final completeness is 99.90 % out to 31.580° in  $\theta$ . A multi-scan absorption correction was performed using **SADABS-2016/2**<sup>5</sup> was used for absorption correction.  $wR_2(\text{int})$  was 0.0643 before and 0.0576 after correction. The Ratio of minimum to maximum transmission is 0.8731. The absorption coefficient  $\mu$  of this material is 2.133 mm<sup>-1</sup> at this wavelength ( $\lambda = 0.71073\text{Å}$ ) and the minimum and maximum transmissions are 0.690 and 0.790. The structure was solved and the space group *Cmce* (# 64) determined by the **ShelXT**<sup>1</sup> structure solution program using dual methods and refined by full matrix least squares minimization on  $F^2$  using version 2018/3 of **ShelXL**<sup>3</sup> 2018/3. All non-hydrogen atoms were refined anisotropically. Hydrogen atom positions were calculated geometrically and refined using the riding model. The value of  $Z'$  is 0.25.

**Table S55: Bond Lengths in Å for compound 1c.**

| Atom | Atom             | Length/Å  | Atom | Atom | Length/Å                 |
|------|------------------|-----------|------|------|--------------------------|
| Zn1  | Zn1 <sup>1</sup> | 2.9829(5) | C1   | C2   | 1.409(4)                 |
| Zn1  | O1               | 2.064(2)  | C1   | C6   | 1.391(4)                 |
| Zn1  | N1               | 2.089(2)  | C2   | C3   | 1.395(4)                 |
| Zn1  | C10              | 1.970(3)  | C3   | C4   | 1.390(4)                 |
| O1   | C2               | 1.343(3)  | C4   | C5   | 1.387(5)                 |
| N1   | C1               | 1.427(4)  | C5   | C6   | 1.389(4)                 |
| N1   | C7               | 1.304(4)  | C10  | C11  | 1.527(5)                 |
| N2   | C7               | 1.328(4)  | ---- |      |                          |
| N2   | C8               | 1.452(4)  |      |      | <sup>1</sup> 1-x,1-y,1-z |
| N2   | C9               | 1.452(4)  |      |      |                          |

**Table S56: Bond Angles in ° for compound 1c.**

| Atom | Atom | Atom             | Angle/°    | Atom | Atom | Atom | Angle/°  |
|------|------|------------------|------------|------|------|------|----------|
| O1   | Zn1  | Zn1 <sup>1</sup> | 43.45(6)   | C2   | C1   | N1   | 115.3(3) |
| O1   | Zn1  | N1               | 80.41(9)   | C6   | C1   | N1   | 124.4(3) |
| N1   | Zn1  | Zn1 <sup>1</sup> | 89.07(7)   | C6   | C1   | C2   | 120.2(3) |
| C10  | Zn1  | Zn1 <sup>1</sup> | 138.61(10) | O1   | C2   | C1   | 119.4(3) |
| C10  | Zn1  | O1               | 125.76(12) | O1   | C2   | C3   | 121.9(3) |
| C10  | Zn1  | N1               | 131.83(12) | C3   | C2   | C1   | 118.6(3) |
| C2   | O1   | Zn1              | 109.58(19) | C4   | C3   | C2   | 121.0(3) |
| C1   | N1   | Zn1              | 107.92(18) | C5   | C4   | C3   | 119.8(3) |
| C7   | N1   | Zn1              | 133.8(2)   | C4   | C5   | C6   | 120.2(3) |
| C7   | N1   | C1               | 117.3(3)   | C5   | C6   | C1   | 120.2(3) |
| C7   | N2   | C8               | 120.8(3)   | N1   | C7   | N2   | 125.1(3) |
| C7   | N2   | C9               | 121.7(3)   | C11  | C10  | Zn1  | 115.1(2) |
| C8   | N2   | C9               | 117.2(3)   | ---- |      |      |          |

**Table S57:** Torsion Angles in ° for **compound 1c**.

| Atom | Atom | Atom | Atom | Angle/°   |
|------|------|------|------|-----------|
| Zn1  | O1   | C2   | C1   | -20.0(3)  |
| Zn1  | O1   | C2   | C3   | 158.5(2)  |
| Zn1  | N1   | C1   | C2   | 18.8(3)   |
| Zn1  | N1   | C1   | C6   | -158.2(3) |
| Zn1  | N1   | C7   | N2   | 19.8(5)   |
| O1   | C2   | C3   | C4   | -177.2(3) |
| N1   | C1   | C2   | O1   | 0.5(4)    |
| N1   | C1   | C2   | C3   | -178.0(3) |
| N1   | C1   | C6   | C5   | 176.9(3)  |
| C1   | N1   | C7   | N2   | -173.3(3) |
| C1   | C2   | C3   | C4   | 1.2(5)    |
| C2   | C1   | C6   | C5   | 0.1(5)    |
| C2   | C3   | C4   | C5   | -0.7(5)   |
| C3   | C4   | C5   | C6   | -0.2(5)   |
| C4   | C5   | C6   | C1   | 0.5(5)    |
| C6   | C1   | C2   | O1   | 177.6(3)  |
| C6   | C1   | C2   | C3   | -0.9(5)   |
| C7   | N1   | C1   | C2   | -151.4(3) |
| C7   | N1   | C1   | C6   | 31.7(4)   |
| C8   | N2   | C7   | N1   | -173.2(3) |
| C9   | N2   | C7   | N1   | 1.3(5)    |

**Table S58:** Atomic Occupancies for all atoms that are not fully occupied in **compound 1c**.

| Atom | Occupancy | Atom | Occupancy | Atom | Occupancy | Atom | Occupancy |
|------|-----------|------|-----------|------|-----------|------|-----------|
| O1   | 0.5       | H4   | 0.5       | H8A  | 0.5       | H10A | 0.5       |
| N1   | 0.5       | C5   | 0.5       | H8B  | 0.5       | H10B | 0.5       |
| N2   | 0.5       | H5   | 0.5       | H8C  | 0.5       | C11  | 0.5       |
| C1   | 0.5       | C6   | 0.5       | C9   | 0.5       | H11A | 0.5       |
| C2   | 0.5       | H6   | 0.5       | H9A  | 0.5       | H11B | 0.5       |
| C3   | 0.5       | C7   | 0.5       | H9B  | 0.5       | H11C | 0.5       |
| H3   | 0.5       | H7   | 0.5       | H9C  | 0.5       |      |           |
| C4   | 0.5       | C8   | 0.5       | C10  | 0.5       |      |           |

# Compound 5c

**$R_1=11.86\%$**

## Crystal Data and Experimental

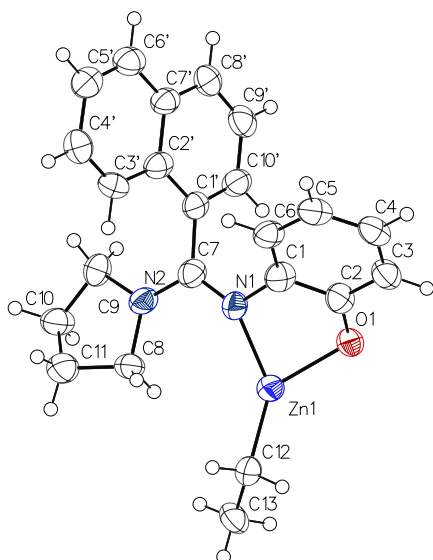

**Figure S131:** ORTEP view of compound **5c**

**Experimental.** Single clear light colourless plate-shaped crystals of **compound 5c** recrystallised from DCM by slow evaporation. A suitable crystal with dimensions 0.12 x 0.08 x 0.04 mm<sup>3</sup> was selected and mounted on a Bruker D8 VENTURE diffractometer. The crystal was kept at a steady  $T = 110.0(1)$  K during data collection. The structure was solved with the **ShelXT**<sup>1</sup> solution program using dual methods and by using **Olex2**<sup>2</sup> 1.5 as the graphical interface. The model was refined with **ShelXL**<sup>3</sup> 2018/3 using full matrix least squares minimisation on  $F^2$ .

**Crystal Data.** C<sub>46</sub>H<sub>48</sub>N<sub>4</sub>O<sub>2</sub>Zn<sub>2</sub>,  $M_r = 819.62$ , triclinic,  $P-1$  (No. 2),  $a = 8.5813(6)$  Å,  $b = 9.6302(7)$  Å,  $c = 12.5497(9)$  Å,  $\alpha = 97.970(4)^\circ$ ,  $\beta = 99.773(4)^\circ$ ,  $\gamma = 102.037(4)^\circ$ ,  $V = 983.15(12)$  Å<sup>3</sup>,  $T = 110.0(1)$  K,  $Z = 1$ ,  $Z' = 0.5$ ,  $\mu(\text{Cu } K\alpha_1) = 1.836$ , 11389 reflections measured, 3446 unique ( $R_{\text{int}} = 0.1034$ ) which were used in all calculations. The final  $wR_2$  was 0.3283 (all data) and  $R_1$  was 0.1186 ( $I \geq 2 \sigma(I)$ ).

**Table S59: Experimental parameters**

| Compound                              | 5c                                                                            |
|---------------------------------------|-------------------------------------------------------------------------------|
| CCDC                                  | 2182080                                                                       |
| Formula                               | C <sub>46</sub> H <sub>48</sub> N <sub>4</sub> O <sub>2</sub> Zn <sub>2</sub> |
| $D_{\text{calc.}} / \text{g cm}^{-3}$ | 1.384                                                                         |
| $\mu / \text{mm}^{-1}$                | 1.836                                                                         |
| Formula Weight                        | 819.62                                                                        |
| Colour                                | clear light colourless                                                        |
| Shape                                 | plate-shaped                                                                  |
| Size/mm <sup>3</sup>                  | 0.12x0.08x0.04                                                                |
| $T/\text{K}$                          | 110.0(1)                                                                      |
| Crystal System                        | triclinic                                                                     |
| Space Group                           | $P-1$                                                                         |
| $a/\text{Å}$                          | 8.5813(6)                                                                     |
| $b/\text{Å}$                          | 9.6302(7)                                                                     |
| $c/\text{Å}$                          | 12.5497(9)                                                                    |
| $\alpha/^\circ$                       | 97.970(4)                                                                     |
| $\beta/^\circ$                        | 99.773(4)                                                                     |
| $\gamma/^\circ$                       | 102.037(4)                                                                    |
| $V/\text{Å}^3$                        | 983.15(12)                                                                    |
| $Z$                                   | 1                                                                             |
| $Z'$                                  | 0.5                                                                           |
| Wavelength/Å                          | 1.54178                                                                       |
| Radiation type                        | Cu $K\alpha_1$                                                                |
| $\Theta_{\text{min}}/^\circ$          | 3.633                                                                         |
| $\Theta_{\text{max}}/^\circ$          | 66.845                                                                        |
| Measured Refl's.                      | 11389                                                                         |
| Indep't Refl's                        | 3446                                                                          |
| Refl's $I \geq 2 \sigma(I)$           | 2739                                                                          |
| $R_{\text{int}}$                      | 0.1034                                                                        |
| Parameters                            | 245                                                                           |
| Restraints                            | 0                                                                             |
| Largest Peak                          | 1.047                                                                         |
| Deepest Hole                          | -1.181                                                                        |
| GooF                                  | 1.069                                                                         |
| $wR_2$ (all data)                     | 0.3283                                                                        |
| $wR_2$                                | 0.3100                                                                        |
| $R_1$ (all data)                      | 0.1420                                                                        |
| $R_1$                                 | 0.1186                                                                        |

**Table S60: Structure Quality Indicators**

|                     |                                             |       |                 |      |                  |        |             |       |
|---------------------|---------------------------------------------|-------|-----------------|------|------------------|--------|-------------|-------|
| <b>Reflections:</b> | d min (Cu $\lambda$ )<br>2 $\theta$ =133.7° | 0.84  | I/ $\sigma$ (I) | 11.8 | R <sub>int</sub> | 10.34% | Full 133.7° | 98.4  |
| <b>Refinement:</b>  | Shift                                       | 0.000 | Max Peak        | 1.1  | Min Peak         | -1.2   | Goof        | 1.069 |

A clear light colourless plate-shaped-shaped crystal with dimensions 0.12 x 0.08 x 0.04 mm<sup>3</sup> was mounted. Data were collected using a Bruker D8 VENTURE diffractometer operating at  $T = 110.0(1)$  K. Data were measured using  $\phi$  and  $\omega$  scans with Cu  $K\alpha_1$  radiation. The diffraction pattern was indexed and the total number of runs, and images was based on the strategy calculation from the program **APEX4**<sup>6</sup>. The maximum resolution that was achieved was  $\theta = 66.845^\circ$  (0.84 Å). The unit cell was refined using **SAINT V8.40B**<sup>4</sup> on 9069 reflections, 80% of the observed reflections. Data reduction, scaling and absorption corrections were performed using **SAINT V8.40B**<sup>4</sup>. The final completeness is 98.40 % out to 66.845° in  $\theta$ . **SADABS-2016/2**<sup>5</sup> was used for absorption correction.  $wR_2(\text{int})$  was 0.1523 before and 0.1083 after correction. The Ratio of minimum to maximum transmission is 0.5663. The absorption coefficient  $\mu$  of this material is 1.836 mm<sup>-1</sup> at this wavelength ( $\lambda = 1.54178\text{Å}$ ) and the minimum and maximum transmissions are 0.426 and 0.753. The structure was solved, and the space group  $P-1$  (# 2) determined by the **ShelXT**<sup>1</sup> structure solution program using dual methods and refined by full matrix least squares minimisation on  $F^2$  using version 2018/3 of **ShelXL**<sup>3</sup> 2018/3. All non-hydrogen atoms were refined anisotropically. Hydrogen atom positions were calculated geometrically and refined using the riding model. The value of  $Z'$  is 0.5. This means that only half of the formula unit is present in the asymmetric unit, with the other half consisting of symmetry equivalent atoms.

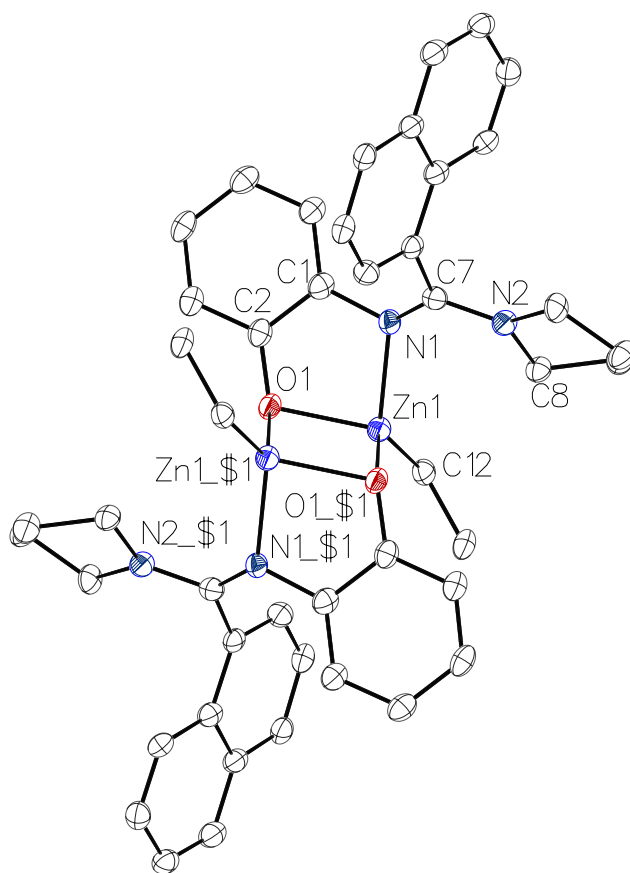

**Figure S132:** ORTEP view of complex **5c**. Thermal ellipsoids are drawn 25% probability level. Hydrogen atoms are omitted for clarity.



**Table S61:** Bond Lengths in Å for **compound 5c**.

| Atom | Atom             | Length/Å  | Atom                    | Atom | Length/Å  |
|------|------------------|-----------|-------------------------|------|-----------|
| Zn1  | Zn1 <sup>1</sup> | 3.009(2)  | C2'                     | C7'  | 1.435(12) |
| Zn1  | O1 <sup>1</sup>  | 2.042(6)  | C3                      | C4   | 1.367(14) |
| Zn1  | O1               | 2.051(6)  | C3'                     | C4'  | 1.346(14) |
| Zn1  | N1               | 2.082(7)  | C4                      | C5   | 1.399(15) |
| Zn1  | C12              | 1.985(9)  | C4'                     | C5'  | 1.433(14) |
| O1   | C2               | 1.354(11) | C5                      | C6   | 1.385(13) |
| N1   | C1               | 1.423(11) | C5'                     | C6'  | 1.369(15) |
| N1   | C7               | 1.307(12) | C6'                     | C7'  | 1.404(14) |
| N2   | C7               | 1.344(12) | C7'                     | C8'  | 1.408(14) |
| N2   | C8               | 1.479(11) | C8                      | C11  | 1.516(14) |
| N2   | C9               | 1.474(11) | C8'                     | C9'  | 1.372(14) |
| C1   | C2               | 1.411(14) | C9                      | C10  | 1.513(13) |
| C1   | C6               | 1.390(13) | C9'                     | C10' | 1.379(14) |
| C1'  | C2'              | 1.416(13) | C10                     | C11  | 1.513(14) |
| C1'  | C7               | 1.507(12) | C12                     | C13  | 1.514(13) |
| C1'  | C10'             | 1.362(14) | ----                    |      |           |
| C2   | C3               | 1.401(13) | <sup>1</sup> 1-x,1-y,-z |      |           |
| C2'  | C3'              | 1.424(13) |                         |      |           |

**Table S62:** Bond Angles in ° for **compound 5c**.

| Atom             | Atom | Atom             | Angle/°   | Atom                    | Atom | Atom | Angle/°   |
|------------------|------|------------------|-----------|-------------------------|------|------|-----------|
| O1 <sup>1</sup>  | Zn1  | Zn1 <sup>1</sup> | 42.81(16) | C1'                     | C2'  | C3'  | 123.3(8)  |
| O1               | Zn1  | Zn1 <sup>1</sup> | 42.57(17) | C1'                     | C2'  | C7'  | 118.4(8)  |
| O1 <sup>1</sup>  | Zn1  | O1               | 85.4(2)   | C3'                     | C2'  | C7'  | 118.3(8)  |
| O1               | Zn1  | N1               | 81.0(3)   | C4                      | C3   | C2   | 121.0(10) |
| O1 <sup>1</sup>  | Zn1  | N1               | 97.4(3)   | C4'                     | C3'  | C2'  | 122.6(8)  |
| N1               | Zn1  | Zn1 <sup>1</sup> | 88.9(2)   | C3                      | C4   | C5   | 120.8(9)  |
| C12              | Zn1  | Zn1 <sup>1</sup> | 143.1(3)  | C3'                     | C4'  | C5'  | 118.5(9)  |
| C12              | Zn1  | O1               | 127.7(3)  | C6                      | C5   | C4   | 118.6(9)  |
| C12              | Zn1  | O1 <sup>1</sup>  | 124.3(3)  | C6'                     | C5'  | C4'  | 120.9(9)  |
| C12              | Zn1  | N1               | 127.5(4)  | C5                      | C6   | C1   | 121.6(10) |
| Zn1 <sup>1</sup> | O1   | Zn1              | 94.6(2)   | C5'                     | C6'  | C7'  | 121.3(9)  |
| C2               | O1   | Zn1              | 108.6(5)  | N1                      | C7   | N2   | 120.3(8)  |
| C2               | O1   | Zn1 <sup>1</sup> | 119.5(5)  | N1                      | C7   | C1'  | 123.9(8)  |
| C1               | N1   | Zn1              | 107.2(6)  | N2                      | C7   | C1'  | 115.6(8)  |
| C7               | N1   | Zn1              | 127.4(6)  | C6'                     | C7'  | C2'  | 118.3(9)  |
| C7               | N1   | C1               | 120.4(8)  | C6'                     | C7'  | C8'  | 122.6(9)  |
| C7               | N2   | C8               | 123.8(7)  | C8'                     | C7'  | C2'  | 119.0(9)  |
| C7               | N2   | C9               | 124.6(8)  | N2                      | C8   | C11  | 101.5(7)  |
| C9               | N2   | C8               | 111.6(7)  | C9'                     | C8'  | C7'  | 120.5(9)  |
| C2               | C1   | N1               | 115.7(8)  | N2                      | C9   | C10  | 103.3(8)  |
| C6               | C1   | N1               | 124.8(9)  | C8'                     | C9'  | C10' | 120.0(9)  |
| C6               | C1   | C2               | 119.3(8)  | C9                      | C10  | C11  | 103.4(8)  |
| C2'              | C1'  | C7               | 121.4(8)  | C1'                     | C10' | C9'  | 122.1(9)  |
| C10'             | C1'  | C2'              | 119.9(8)  | C10                     | C11  | C8   | 103.3(8)  |
| C10'             | C1'  | C7               | 118.7(8)  | C13                     | C12  | Zn1  | 117.2(7)  |
| O1               | C2   | C1               | 118.9(8)  | ----                    |      |      |           |
| O1               | C2   | C3               | 122.4(9)  | <sup>1</sup> 1-x,1-y,-z |      |      |           |
| C3               | C2   | C1               | 118.7(9)  |                         |      |      |           |

**Table S63:** Torsion Angles in ° for **compound 5c**.

| Atom | Atom | Atom | Atom | Angle/°  |
|------|------|------|------|----------|
| Zn1  | O1   | C2   | C1   | -22.2(9) |

| Atom             | Atom | Atom | Atom | Angle/°    |
|------------------|------|------|------|------------|
| Zn1 <sup>1</sup> | O1   | C2   | C1   | 84.6(9)    |
| Zn1 <sup>1</sup> | O1   | C2   | C3   | -97.5(9)   |
| Zn1              | O1   | C2   | C3   | 155.8(8)   |
| Zn1              | N1   | C1   | C2   | 19.3(9)    |
| Zn1              | N1   | C1   | C6   | -154.6(8)  |
| Zn1              | N1   | C7   | N2   | 40.7(12)   |
| Zn1              | N1   | C7   | C1'  | -134.8(7)  |
| O1               | C2   | C3   | C4   | -178.0(8)  |
| N1               | C1   | C2   | O1   | 1.7(12)    |
| N1               | C1   | C2   | C3   | -176.3(8)  |
| N1               | C1   | C6   | C5   | 175.1(9)   |
| N2               | C8   | C11  | C10  | 36.4(10)   |
| N2               | C9   | C10  | C11  | 28.8(11)   |
| C1               | N1   | C7   | N2   | -167.8(8)  |
| C1               | N1   | C7   | C1'  | 16.7(14)   |
| C1               | C2   | C3   | C4   | -0.1(14)   |
| C1'              | C2'  | C3'  | C4'  | -179.6(8)  |
| C1'              | C2'  | C7'  | C6'  | -179.0(8)  |
| C1'              | C2'  | C7'  | C8'  | 0.8(12)    |
| C2               | C1   | C6   | C5   | 1.4(14)    |
| C2               | C3   | C4   | C5   | 3.0(14)    |
| C2'              | C1'  | C7   | N1   | -109.1(10) |
| C2'              | C1'  | C7   | N2   | 75.2(10)   |
| C2'              | C1'  | C10' | C9'  | -1.9(13)   |
| C2'              | C3'  | C4'  | C5'  | -0.6(14)   |
| C2'              | C7'  | C8'  | C9'  | -0.2(13)   |
| C3               | C4   | C5   | C6   | -3.7(14)   |
| C3'              | C2'  | C7'  | C6'  | 2.8(12)    |
| C3'              | C2'  | C7'  | C8'  | -177.5(8)  |
| C3'              | C4'  | C5'  | C6'  | 1.3(14)    |
| C4               | C5   | C6   | C1   | 1.5(14)    |
| C4'              | C5'  | C6'  | C7'  | 0.1(14)    |
| C5'              | C6'  | C7'  | C2'  | -2.2(14)   |
| C5'              | C6'  | C7'  | C8'  | 178.1(9)   |
| C6               | C1   | C2   | O1   | 175.9(8)   |
| C6               | C1   | C2   | C3   | -2.1(13)   |
| C6'              | C7'  | C8'  | C9'  | 179.5(9)   |
| C7               | N1   | C1   | C2   | -137.4(9)  |
| C7               | N1   | C1   | C6   | 48.8(13)   |
| C7               | N2   | C8   | C11  | 161.5(9)   |
| C7               | N2   | C9   | C10  | 173.4(9)   |
| C7               | C1'  | C2'  | C3'  | -3.5(13)   |
| C7               | C1'  | C2'  | C7'  | 178.3(8)   |
| C7               | C1'  | C10' | C9'  | 179.9(8)   |
| C7'              | C2'  | C3'  | C4'  | -1.5(13)   |
| C7'              | C8'  | C9'  | C10' | -1.5(13)   |
| C8               | N2   | C7   | N1   | 8.4(14)    |
| C8               | N2   | C7   | C1'  | -175.7(8)  |
| C8               | N2   | C9   | C10  | -6.0(11)   |
| C8'              | C9'  | C10' | C1'  | 2.6(14)    |
| C9               | N2   | C7   | N1   | -170.9(9)  |
| C9               | N2   | C7   | C1'  | 4.9(13)    |
| C9               | N2   | C8   | C11  | -19.0(10)  |
| C9               | C10  | C11  | C8   | -41.2(11)  |
| C10'             | C1'  | C2'  | C3'  | 178.4(8)   |
| C10'             | C1'  | C2'  | C7'  | 0.3(12)    |
| C10'             | C1'  | C7   | N1   | 69.0(12)   |
| C10'             | C1'  | C7   | N2   | -106.7(10) |

-----  
<sup>1</sup>1-x,1-y,-z



### Crystal Data and Experimental

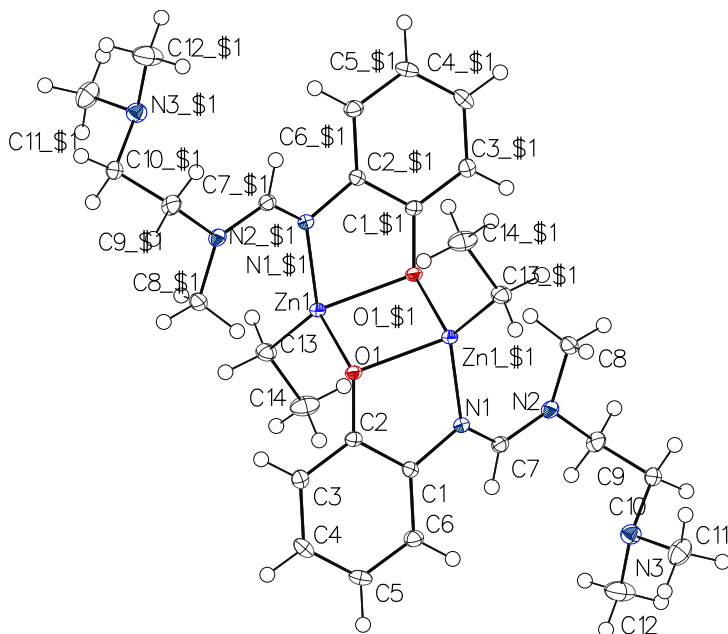

Figure S132: ORTEP view of compound 6c

**Experimental.** Single clear light colourless prism crystals of **compound 6c** recrystallised from DCM by slow evaporation. A suitable crystal with dimensions 0.42 x 0.20 x 0.16 mm<sup>3</sup> was selected and mounted on a MITIGEN holder oil on a Bruker D8 Venture diffractometer. The crystal was kept at a steady  $T = 100.0(1)$  K during data collection. The structure was solved with the **ShelXT**<sup>1</sup> solution program using dual methods and by using **Olex2**<sup>2</sup> as the graphical interface. The model was refined with **ShelXL**<sup>3</sup> 2018/3 using full matrix least squares minimisation on  $F^2$ .

**Crystal Data.** C<sub>28</sub>H<sub>46</sub>N<sub>6</sub>O<sub>2</sub>Zn<sub>2</sub>,  $M_r = 629.45$ , monoclinic,  $P2_1/n$  (No. 14),  $a = 10.0934(6)$  Å,  $b = 14.4079(8)$  Å,  $c = 11.0432(7)$  Å,  $\beta = 107.793(2)^\circ$ ,  $\alpha = \gamma = 90^\circ$ ,  $V = 1529.14(16)$  Å<sup>3</sup>,  $T = 100.0(1)$  K,  $Z = 2$ ,  $Z' = 0.5$ ,  $\mu(\text{MoK}\alpha) = 1.603$ , 81240 reflections measured, 3525 unique ( $R_{\text{int}} = 0.0410$ ) which were used in all calculations. The final  $wR_2$  was 0.0500 (all data) and  $R_1$  was 0.0198 ( $I \geq 2 \sigma(I)$ ).

Table S64: Experimental parameters

|                                      |                                                                               |
|--------------------------------------|-------------------------------------------------------------------------------|
| Compound                             | 6c                                                                            |
| CCDC                                 | 2182081                                                                       |
| Formula                              | C <sub>28</sub> H <sub>46</sub> N <sub>6</sub> O <sub>2</sub> Zn <sub>2</sub> |
| $D_{\text{calc}} / \text{g cm}^{-3}$ | 1.367                                                                         |
| $\mu / \text{mm}^{-1}$               | 1.603                                                                         |
| Formula Weight                       | 629.45                                                                        |
| Colour                               | clear light colourless                                                        |
| Shape                                | prism                                                                         |
| Size/mm <sup>3</sup>                 | 0.42x0.20x0.16                                                                |
| $T/\text{K}$                         | 100.0(1)                                                                      |
| Crystal System                       | monoclinic                                                                    |
| Space Group                          | $P2_1/n$                                                                      |
| $a/\text{Å}$                         | 10.0934(6)                                                                    |
| $b/\text{Å}$                         | 14.4079(8)                                                                    |
| $c/\text{Å}$                         | 11.0432(7)                                                                    |
| $\alpha/^\circ$                      | 90                                                                            |
| $\beta/^\circ$                       | 107.793(2)                                                                    |
| $\gamma/^\circ$                      | 90                                                                            |
| $V/\text{Å}^3$                       | 1529.14(16)                                                                   |
| $Z$                                  | 2                                                                             |
| $Z'$                                 | 0.5                                                                           |
| Wavelength/Å                         | 0.71073                                                                       |
| Radiation type                       | MoK $\alpha$                                                                  |
| $\theta_{\text{min}}/^\circ$         | 2.548                                                                         |
| $\theta_{\text{max}}/^\circ$         | 27.543                                                                        |
| Measured Refl's.                     | 81240                                                                         |
| Indep't Refl's                       | 3525                                                                          |
| Refl's $I \geq 2 \sigma(I)$          | 3108                                                                          |
| $R_{\text{int}}$                     | 0.0410                                                                        |
| Parameters                           | 176                                                                           |
| Restraints                           | 0                                                                             |
| Largest Peak                         | 0.360                                                                         |
| Deepest Hole                         | -0.294                                                                        |
| GooF                                 | 1.054                                                                         |
| $wR_2$ (all data)                    | 0.0500                                                                        |
| $wR_2$                               | 0.0477                                                                        |
| $R_1$ (all data)                     | 0.0253                                                                        |
| $R_1$                                | 0.0198                                                                        |

**Table S65: Structure Quality Indicators**

|                     |                                 |        |                 |      |          |       |            |       |
|---------------------|---------------------------------|--------|-----------------|------|----------|-------|------------|-------|
| <b>Reflections:</b> | d min (Mo)<br>2 $\theta$ =55.1° | 0.77   | I/ $\sigma$ (I) | 86.6 | Rint     | 4.10% | Full 50.5° | 99.9  |
| <b>Refinement:</b>  | Shift                           | -0.001 | Max Peak        | 0.4  | Min Peak | -0.3  | Goof       | 1.054 |

A clear light colourless prism-shaped crystal with dimensions 0.42 x 0.20 x 0.16 mm<sup>3</sup> was mounted on a MITIGEN holder oil. Data were collected using a Bruker D8 Venture diffractometer equipped with an Oxford Cryosystems low-temperature device operating at  $T = 100.0(1)$  K. Data were measured using  $\phi$  and  $\omega$  scans using MoK $\alpha$  radiation. The maximum resolution that was achieved was  $\theta = 27.543^\circ$  (0.77 Å). The unit cell was refined using **SAINT** V8.40B<sup>4</sup> on 9889 reflections, 12% of the observed reflections. Data reduction, scaling and absorption corrections were performed using **SAINT** V8.40B<sup>4</sup>. The final completeness is 99.90 % out to 27.543° in  $\theta$ . A multi-scan absorption correction was performed using **SADABS-2016/2**<sup>5</sup> was used for absorption correction.  $wR_2(\text{int})$  was 0.0629 before and 0.0527 after correction. The Ratio of minimum to maximum transmission is 0.8625. The absorption coefficient  $\mu$  of this material is 1.603 mm<sup>-1</sup> at this wavelength ( $\lambda = 0.71073\text{Å}$ ) and the minimum and maximum transmissions are 0.616 and 0.714. The structure was solved, and the space group  $P2_1/n$  (# 14) determined by the **ShelXT**<sup>1</sup> structure solution program using dual methods and refined by full matrix least squares minimisation on  $F^2$  using version 2018/3 of **ShelXL**<sup>3</sup> 2018/3. All non-hydrogen atoms were refined anisotropically. Hydrogen atom positions were calculated geometrically and refined using the riding model. The value of  $Z'$  is 0.5. This means that only half of the formula unit is present in the asymmetric unit, with the other half consisting of symmetry equivalent atoms.

**Table S66: Bond Lengths in Å for compound 6c.**

| Atom | Atom             | Length/Å   | Atom | Atom | Length/Å               |
|------|------------------|------------|------|------|------------------------|
| Zn1  | Zn1 <sup>1</sup> | 3.0242(3)  | N3   | C11  | 1.4565(18)             |
| Zn1  | O1 <sup>1</sup>  | 2.0689(9)  | N3   | C12  | 1.4559(18)             |
| Zn1  | O1               | 2.0610(9)  | C14  | C13  | 1.5311(19)             |
| Zn1  | N1 <sup>1</sup>  | 2.0714(10) | C1   | C2   | 1.4165(17)             |
| Zn1  | C13              | 1.9778(13) | C1   | C6   | 1.3931(17)             |
| O1   | C2               | 1.3489(15) | C2   | C3   | 1.3964(17)             |
| N1   | C1               | 1.4259(15) | C3   | C4   | 1.3920(18)             |
| N1   | C7               | 1.3022(16) | C4   | C5   | 1.3857(19)             |
| N2   | C7               | 1.3296(16) | C5   | C6   | 1.3954(18)             |
| N2   | C8               | 1.4603(16) | C9   | C10  | 1.5250(19)             |
| N2   | C9               | 1.4659(16) | ---- |      |                        |
| N3   | C10              | 1.4563(17) |      |      | <sup>1-x,1-y,1-z</sup> |

**Table S67: Bond Angles in ° for compound 6c.**

| Atom            | Atom | Atom             | Angle/°   | Atom | Atom | Atom             | Angle/°    |
|-----------------|------|------------------|-----------|------|------|------------------|------------|
| O1              | Zn1  | Zn1 <sup>1</sup> | 43.02(2)  | C2   | O1   | Zn1              | 120.56(7)  |
| O1 <sup>1</sup> | Zn1  | Zn1 <sup>1</sup> | 42.82(2)  | C2   | O1   | Zn1 <sup>1</sup> | 109.57(7)  |
| O1              | Zn1  | O1 <sup>1</sup>  | 85.84(3)  | C1   | N1   | Zn1 <sup>1</sup> | 107.86(8)  |
| O1              | Zn1  | N1 <sup>1</sup>  | 101.91(4) | C7   | N1   | Zn1 <sup>1</sup> | 134.49(9)  |
| O1 <sup>1</sup> | Zn1  | N1 <sup>1</sup>  | 80.90(4)  | C7   | N1   | C1               | 117.33(10) |
| N1 <sup>1</sup> | Zn1  | Zn1 <sup>1</sup> | 91.85(3)  | C7   | N2   | C8               | 121.33(11) |
| C13             | Zn1  | Zn1 <sup>1</sup> | 135.17(4) | C7   | N2   | C9               | 119.09(11) |
| C13             | Zn1  | O1 <sup>1</sup>  | 126.58(5) | C8   | N2   | C9               | 118.13(10) |
| C13             | Zn1  | O1               | 116.26(5) | C10  | N3   | C11              | 110.47(11) |
| C13             | Zn1  | N1 <sup>1</sup>  | 132.63(5) | C12  | N3   | C10              | 111.11(11) |
| Zn1             | O1   | Zn1 <sup>1</sup> | 94.16(3)  | C12  | N3   | C11              | 109.12(12) |

| Atom | Atom | Atom | Angle/°    | Atom                   | Atom | Atom | Angle/°    |
|------|------|------|------------|------------------------|------|------|------------|
| C2   | C1   | N1   | 115.50(10) | C4                     | C5   | C6   | 119.90(12) |
| C6   | C1   | N1   | 124.58(11) | C1                     | C6   | C5   | 120.32(12) |
| C6   | C1   | C2   | 119.90(11) | N1                     | C7   | N2   | 125.36(12) |
| O1   | C2   | C1   | 118.92(11) | N2                     | C9   | C10  | 112.39(11) |
| O1   | C2   | C3   | 122.31(11) | C14                    | C13  | Zn1  | 113.33(10) |
| C3   | C2   | C1   | 118.75(11) | N3                     | C10  | C9   | 112.46(11) |
| C4   | C3   | C2   | 120.69(12) | ----                   |      |      |            |
| C5   | C4   | C3   | 120.33(12) | <sup>1-x,1-y,1-z</sup> |      |      |            |

**Table S68:** Torsion Angles in ° for **compound 6c**.

| Atom                   | Atom | Atom | Atom | Angle/°     |
|------------------------|------|------|------|-------------|
| Zn1                    | O1   | C2   | C1   | 91.04(12)   |
| Zn1 <sup>1</sup>       | O1   | C2   | C1   | -16.38(13)  |
| Zn1 <sup>1</sup>       | O1   | C2   | C3   | 162.24(10)  |
| Zn1                    | O1   | C2   | C3   | -90.35(12)  |
| Zn1 <sup>1</sup>       | N1   | C1   | C2   | 21.63(12)   |
| Zn1 <sup>1</sup>       | N1   | C1   | C6   | -156.44(11) |
| Zn1 <sup>1</sup>       | N1   | C7   | N2   | 7.2(2)      |
| O1                     | C2   | C3   | C4   | -175.58(11) |
| N1                     | C1   | C2   | O1   | -3.80(16)   |
| N1                     | C1   | C2   | C3   | 177.53(11)  |
| N1                     | C1   | C6   | C5   | -179.10(12) |
| N2                     | C9   | C10  | N3   | 68.27(14)   |
| C1                     | N1   | C7   | N2   | 179.81(12)  |
| C1                     | C2   | C3   | C4   | 3.03(18)    |
| C2                     | C1   | C6   | C5   | 2.91(19)    |
| C2                     | C3   | C4   | C5   | -0.3(2)     |
| C3                     | C4   | C5   | C6   | -1.1(2)     |
| C4                     | C5   | C6   | C1   | -0.2(2)     |
| C6                     | C1   | C2   | O1   | 174.36(11)  |
| C6                     | C1   | C2   | C3   | -4.30(18)   |
| C7                     | N1   | C1   | C2   | -152.84(11) |
| C7                     | N1   | C1   | C6   | 29.09(18)   |
| C7                     | N2   | C9   | C10  | -87.20(14)  |
| C8                     | N2   | C7   | N1   | 3.7(2)      |
| C8                     | N2   | C9   | C10  | 79.26(14)   |
| C9                     | N2   | C7   | N1   | 169.69(12)  |
| C11                    | N3   | C10  | C9   | -160.32(12) |
| C12                    | N3   | C10  | C9   | 78.41(14)   |
| ----                   |      |      |      |             |
| <sup>1-x,1-y,1-z</sup> |      |      |      |             |

# Compound 1d

$R_1=2.53\%$

## Crystal Data and Experimental

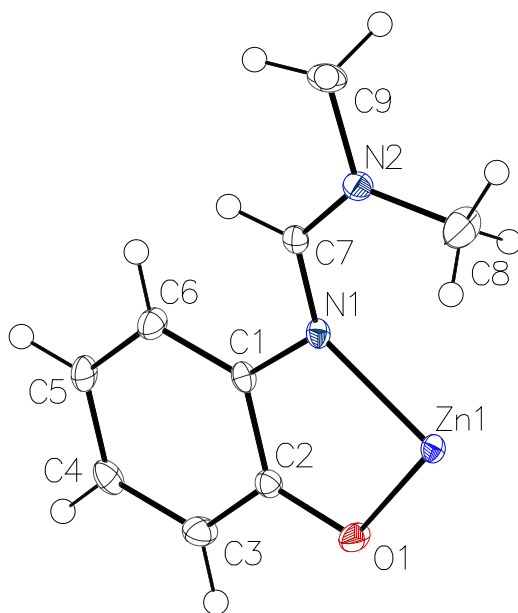

**Figure S133:** ORTEP view of compound **1d**

**Experimental.** Single clear light colourless prism-shaped crystals of **compound 1d** recrystallised from chloroform by slow evaporation. A suitable crystal with dimensions 0.31 x 0.14 x 0.07 mm<sup>3</sup> was selected and mounted on a MITIGEN holder oil on a Bruker D8 Venture diffractometer. The crystal was kept at a steady  $T = 100.0(1)$  K during data collection. The structure was solved with the **ShelXT**<sup>1</sup> solution program using dual methods and by using **Olex2**<sup>2</sup> 1.5 as the graphical interface. The model was refined with **ShelXL**<sup>3</sup> 2018/3 using full matrix least squares minimisation on  $F^2$ .

**Crystal Data.** C<sub>18</sub>H<sub>22</sub>N<sub>4</sub>O<sub>2</sub>Zn,  $M_r = 391.76$ , monoclinic,  $C2/c$  (No. 15),  $a = 13.8168(15)$  Å,  $b = 11.5315(13)$  Å,  $c = 11.4556(11)$  Å,  $\beta = 110.176(3)^\circ$ ,  $\alpha = \gamma = 90^\circ$ ,  $V = 1713.2(3)$  Å<sup>3</sup>,  $T = 100.0(1)$  K,  $Z = 4$ ,  $Z' = 0.5$ ,  $\mu(\text{Mo } K_{\alpha 1}) = 1.453$ , 60525 reflections measured, 1977 unique ( $R_{\text{int}} = 0.0725$ ) which were used in all calculations. The final  $wR_2$  was 0.0616 (all data) and  $R_1$  was 0.0253 ( $I \geq 2 \sigma(I)$ ).

**Table S69: Experimental parameters**

|                                       |                                                                  |
|---------------------------------------|------------------------------------------------------------------|
| <b>Compound</b>                       | <b>1d</b>                                                        |
| <b>CCDC</b>                           | <b>2182082</b>                                                   |
| Formula                               | C <sub>18</sub> H <sub>22</sub> N <sub>4</sub> O <sub>2</sub> Zn |
| $D_{\text{calc.}} / \text{g cm}^{-3}$ | 1.519                                                            |
| $\mu / \text{mm}^{-1}$                | 1.453                                                            |
| Formula Weight                        | 391.76                                                           |
| Colour                                | clear light colourless                                           |
| Shape                                 | prism-shaped                                                     |
| Size/mm <sup>3</sup>                  | 0.31x0.14x0.07                                                   |
| $T/\text{K}$                          | 100.0(1)                                                         |
| Crystal System                        | monoclinic                                                       |
| Space Group                           | $C2/c$                                                           |
| $a/\text{Å}$                          | 13.8168(15)                                                      |
| $b/\text{Å}$                          | 11.5315(13)                                                      |
| $c/\text{Å}$                          | 11.4556(11)                                                      |
| $\alpha/^\circ$                       | 90                                                               |
| $\beta/^\circ$                        | 110.176(3)                                                       |
| $\gamma/^\circ$                       | 90                                                               |
| $V/\text{Å}^3$                        | 1713.2(3)                                                        |
| $Z$                                   | 4                                                                |
| $Z'$                                  | 0.5                                                              |
| Wavelength/Å                          | 0.71073                                                          |
| Radiation type                        | Mo $K_{\alpha 1}$                                                |
| $\Theta_{\text{min}}/^\circ$          | 2.363                                                            |
| $\Theta_{\text{max}}/^\circ$          | 27.585                                                           |
| Measured Refl's.                      | 60525                                                            |
| Indep't Refl's                        | 1977                                                             |
| Refl's $I \geq 2 \sigma(I)$           | 1689                                                             |
| $R_{\text{int}}$                      | 0.0725                                                           |
| Parameters                            | 116                                                              |
| Restraints                            | 0                                                                |
| Largest Peak                          | 0.385                                                            |
| Deepest Hole                          | -0.357                                                           |
| GooF                                  | 1.086                                                            |
| $wR_2$ (all data)                     | 0.0616                                                           |
| $wR_2$                                | 0.0578                                                           |
| $R_1$ (all data)                      | 0.0345                                                           |
| $R_1$                                 | 0.0253                                                           |

**Table S70: Structure Quality Indicators**

|                     |                                 |       |                 |      |          |       |            |       |
|---------------------|---------------------------------|-------|-----------------|------|----------|-------|------------|-------|
| <b>Reflections:</b> | d min (Mo)<br>2 $\theta$ =55.2° | 0.77  | I/ $\sigma$ (I) | 60.5 | Rint     | 7.25% | Full 50.5° | 100   |
| <b>Refinement:</b>  | Shift                           | 0.000 | Max Peak        | 0.4  | Min Peak | -0.4  | Goof       | 1.086 |

A clear light colourless prism-shaped crystal with dimensions 0.31 x 0.14 x 0.07 mm<sup>3</sup> was mounted on a MITIGEN holder oil. Data were collected using a Bruker D8 Venture diffractometer equipped with an Oxford Cryosystems low-temperature device operating at  $T = 100.0(1)$  K. Data were measured using  $\phi$  and  $\omega$  scans with Mo  $K_{\alpha 1}$  radiation. The diffraction pattern was indexed and the total number of runs, and images was based on the strategy calculation from the program **APEX4**<sup>6</sup>. The maximum resolution that was achieved was  $\theta = 27.585^\circ$  (0.77 Å). The unit cell was refined using **SAINT V8.40A**<sup>8</sup> on 9800 reflections, 16% of the observed reflections. Data reduction, scaling and absorption corrections were performed using **SAINT V8.40A**<sup>8</sup>. The final completeness is 100.00 % out to 27.585° in  $\theta$ . **SADABS-2016/2**<sup>5</sup> was used for absorption correction.  $wR_2(\text{int})$  was 0.0725 before and 0.0616 after correction. The Ratio of minimum to maximum transmission is 0.8721. The absorption coefficient  $\mu$  of this material is 1.453 mm<sup>-1</sup> at this wavelength ( $\lambda = 0.71073$  Å) and the minimum and maximum transmissions are 0.720 and 0.825. The structure was solved, and the space group  $C2/c$  (# 15) determined by the **ShelXT**<sup>1</sup> structure solution program using dual methods and refined by full matrix least squares minimisation on  $F^2$  using version 2018/3 of **ShelXL**<sup>3</sup> 2018/3. All non-hydrogen atoms were refined anisotropically. Hydrogen atom positions were calculated geometrically and refined using the riding model. The value of  $Z'$  is 0.5. This means that only half of the formula unit is present in the asymmetric unit, with the other half consisting of symmetry equivalent atoms.

**Table S71: Bond Lengths in Å for compound 1d.**

| Atom | Atom            | Length/Å   | Atom | Atom | Length/Å                  |
|------|-----------------|------------|------|------|---------------------------|
| Zn1  | O1 <sup>1</sup> | 1.9339(12) | N2   | C8   | 1.451(2)                  |
| Zn1  | O1              | 1.9339(12) | C1   | C2   | 1.420(2)                  |
| Zn1  | N1 <sup>1</sup> | 2.0240(14) | C1   | C6   | 1.392(2)                  |
| Zn1  | N1              | 2.0240(14) | C2   | C3   | 1.398(2)                  |
| O1   | C2              | 1.329(2)   | C5   | C4   | 1.385(3)                  |
| N1   | C7              | 1.306(2)   | C5   | C6   | 1.391(2)                  |
| N1   | C1              | 1.433(2)   | C4   | C3   | 1.388(2)                  |
| N2   | C7              | 1.323(2)   | ---- |      |                           |
| N2   | C9              | 1.458(2)   |      |      | <sup>1</sup> 1-x,+y,1/2-z |

**Table S72: Bond Angles in ° for compound 1d.**

| Atom            | Atom | Atom            | Angle/°    | Atom | Atom | Atom | Angle/°                   |
|-----------------|------|-----------------|------------|------|------|------|---------------------------|
| O1 <sup>1</sup> | Zn1  | O1              | 117.76(8)  | N1   | C7   | N2   | 125.90(15)                |
| O1              | Zn1  | N1              | 86.49(5)   | C2   | C1   | N1   | 115.02(14)                |
| O1 <sup>1</sup> | Zn1  | N1 <sup>1</sup> | 86.49(5)   | C6   | C1   | N1   | 125.54(15)                |
| O1 <sup>1</sup> | Zn1  | N1              | 119.77(5)  | C6   | C1   | C2   | 119.44(15)                |
| O1              | Zn1  | N1 <sup>1</sup> | 119.77(5)  | O1   | C2   | C1   | 120.84(14)                |
| N1              | Zn1  | N1 <sup>1</sup> | 130.19(8)  | O1   | C2   | C3   | 120.95(15)                |
| C2              | O1   | Zn1             | 110.62(10) | C3   | C2   | C1   | 118.21(15)                |
| C7              | N1   | Zn1             | 134.23(11) | C4   | C5   | C6   | 119.55(15)                |
| C7              | N1   | C1              | 118.42(13) | C5   | C4   | C3   | 120.02(16)                |
| C1              | N1   | Zn1             | 107.02(10) | C4   | C3   | C2   | 121.54(16)                |
| C7              | N2   | C9              | 120.67(15) | C5   | C6   | C1   | 121.23(16)                |
| C7              | N2   | C8              | 123.01(15) | ---- |      |      |                           |
| C8              | N2   | C9              | 116.21(15) |      |      |      | <sup>1</sup> 1-x,+y,1/2-z |



**Table S73:** Torsion Angles in ° for **compound 1d**.

| Atom | Atom | Atom | Atom | Angle/°     |
|------|------|------|------|-------------|
| Zn1  | O1   | C2   | C1   | -1.22(19)   |
| Zn1  | O1   | C2   | C3   | 179.52(13)  |
| Zn1  | N1   | C7   | N2   | 10.8(3)     |
| Zn1  | N1   | C1   | C2   | -0.21(16)   |
| Zn1  | N1   | C1   | C6   | 179.90(14)  |
| O1   | C2   | C3   | C4   | 178.57(16)  |
| N1   | C1   | C2   | O1   | 1.0(2)      |
| N1   | C1   | C2   | C3   | -179.74(14) |
| N1   | C1   | C6   | C5   | -179.29(16) |
| C7   | N1   | C1   | C2   | -174.52(14) |
| C7   | N1   | C1   | C6   | 5.6(2)      |
| C1   | N1   | C7   | N2   | -176.78(15) |
| C1   | C2   | C3   | C4   | -0.7(3)     |
| C2   | C1   | C6   | C5   | 0.8(3)      |
| C5   | C4   | C3   | C2   | 0.3(3)      |
| C4   | C5   | C6   | C1   | -1.3(3)     |
| C6   | C1   | C2   | O1   | -179.12(15) |
| C6   | C1   | C2   | C3   | 0.2(2)      |
| C6   | C5   | C4   | C3   | 0.7(3)      |
| C9   | N2   | C7   | N1   | 175.60(16)  |
| C8   | N2   | C7   | N1   | -0.4(3)     |

## Crystal Data and Experimental

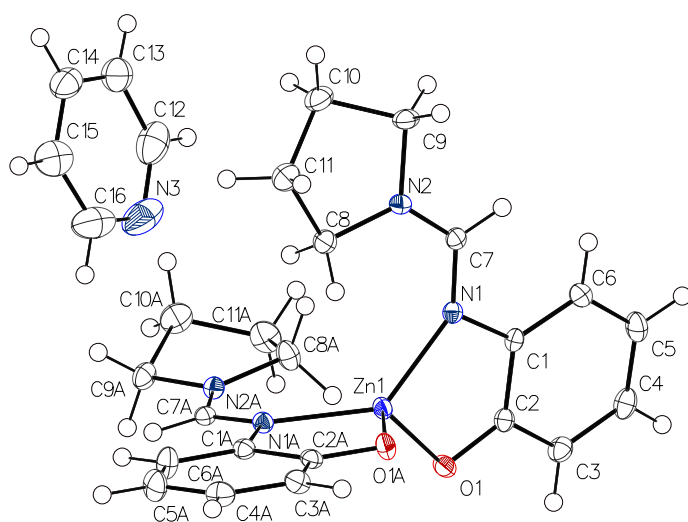

**Figure S134:** ORTEP view of compound **2d**

**Experimental.** Single clear light colourless prism-shaped crystals of **compound 2d** recrystallised from a mixture of cyclohexane and pyridine by slow evaporation. A suitable crystal with dimensions 0.29 x 0.27 x 0.27 mm<sup>3</sup> was selected and mounted on a MITIGEN holder oil on a Nonius APEX-II CCD diffractometer. The crystal was kept at a steady  $T = 110.0(1)$  K during data collection. The structure was solved with the **ShelXT**<sup>1</sup> 2018/2 solution program using dual methods and by using **Olex2**<sup>2</sup> 1.5 as the graphical interface. The model was refined with **ShelXL**<sup>3</sup> 2018/3 using full matrix least squares minimisation on  $F^2$ .

**Crystal Data.** C<sub>27</sub>H<sub>31</sub>N<sub>5</sub>O<sub>2</sub>Zn,  $M_r = 522.94$ , triclinic,  $P-1$  (No. 2),  $a = 10.7763(3)$  Å,  $b = 11.2517(3)$  Å,  $c = 12.6240(3)$  Å,  $\alpha = 93.987(2)^\circ$ ,  $\beta = 111.8620(10)^\circ$ ,  $\gamma = 115.4340(10)^\circ$ ,  $V = 1233.90(6)$  Å<sup>3</sup>,  $T = 110.0(1)$  K,  $Z = 2$ ,  $Z' = 1$ ,  $\mu(\text{Mo } K\alpha_1) = 1.030$ , 32448 reflections measured, 5666 unique ( $R_{\text{int}} = 0.0245$ ) which were used in all calculations. The final  $wR_2$  was 0.0591 (all data) and  $R_1$  was 0.0238 ( $I \geq 2 \sigma(I)$ ).

**Table S74:** Experimental parameters

| Compound                              | <b>2d</b>                                                        |
|---------------------------------------|------------------------------------------------------------------|
| CCDC                                  | <b>2182083</b>                                                   |
| Formula                               | C <sub>27</sub> H <sub>31</sub> N <sub>5</sub> O <sub>2</sub> Zn |
| $D_{\text{calc.}} / \text{g cm}^{-3}$ | 1.407                                                            |
| $\mu / \text{mm}^{-1}$                | 1.030                                                            |
| Formula Weight                        | 522.94                                                           |
| Colour                                | clear light colourless                                           |
| Shape                                 | prism-shaped                                                     |
| Size/mm <sup>3</sup>                  | 0.29x0.27x0.27                                                   |
| $T/\text{K}$                          | 110.0(1)                                                         |
| Crystal System                        | triclinic                                                        |
| Space Group                           | $P-1$                                                            |
| $a/\text{Å}$                          | 10.7763(3)                                                       |
| $b/\text{Å}$                          | 11.2517(3)                                                       |
| $c/\text{Å}$                          | 12.6240(3)                                                       |
| $\alpha/^\circ$                       | 93.987(2)                                                        |
| $\beta/^\circ$                        | 111.8620(10)                                                     |
| $\gamma/^\circ$                       | 115.4340(10)                                                     |
| $V/\text{Å}^3$                        | 1233.90(6)                                                       |
| $Z$                                   | 2                                                                |
| $Z'$                                  | 1                                                                |
| Wavelength/Å                          | 0.71073                                                          |
| Radiation type                        | Mo $K\alpha_1$                                                   |
| $\Theta_{\text{min}}/^\circ$          | 2.339                                                            |
| $\Theta_{\text{max}}/^\circ$          | 27.509                                                           |
| Measured Refl's.                      | 32448                                                            |
| Indep't Refl's                        | 5666                                                             |
| Refl's $I \geq 2 \sigma(I)$           | 5056                                                             |
| $R_{\text{int}}$                      | 0.0245                                                           |
| Parameters                            | 316                                                              |
| Restraints                            | 0                                                                |
| Largest Peak                          | 0.581                                                            |
| Deepest Hole                          | -0.241                                                           |
| GooF                                  | 1.021                                                            |
| $wR_2$ (all data)                     | 0.0591                                                           |
| $wR_2$                                | 0.0564                                                           |
| $R_1$ (all data)                      | 0.0294                                                           |
| $R_1$                                 | 0.0238                                                           |

**Table S75: Structure Quality Indicators**

|                     |                                 |        |                 |      |          |       |            |       |
|---------------------|---------------------------------|--------|-----------------|------|----------|-------|------------|-------|
| <b>Reflections:</b> | d min (Mo)<br>2 $\theta$ =55.0° | 0.77   | I/ $\sigma$ (I) | 52.8 | Rint     | 2.45% | Full 50.5° | 99.9  |
| <b>Refinement:</b>  | Shift                           | -0.002 | Max Peak        | 0.6  | Min Peak | -0.2  | Goof       | 1.021 |

A clear light colourless prism-shaped crystal with dimensions 0.29 x 0.27 x 0.27 mm<sup>3</sup> was mounted on a MITIGEN holder oil. Data were collected using a Nonius APEX-II CCD diffractometer equipped with an Oxford Cryosystems low-temperature device operating at  $T = 110.0(1)$  K. Data were measured using  $\phi$  and  $\omega$  scans with Mo  $K_{\alpha 1}$  radiation. The diffraction pattern was indexed and the total number of runs, and images was based on the strategy calculation from the program **APEX4**<sup>6</sup>. The maximum resolution that was achieved was  $\theta = 27.509^\circ$  (0.77 Å). The unit cell was refined using **SAINT V8.40B**<sup>4</sup> on 9862 reflections, 30% of the observed reflections. Data reduction, scaling and absorption corrections were performed using **SAINT V8.40B**<sup>4</sup>. The final completeness is 99.90 % out to  $27.509^\circ$  in  $\theta$ . **SADABS-2016/2**<sup>5</sup> was used for absorption correction.  $wR_2(\text{int})$  was 0.0401 before and 0.0347 after correction. The Ratio of minimum to maximum transmission is 0.9273. The absorption coefficient  $\mu$  of this material is 1.030 mm<sup>-1</sup> at this wavelength ( $\lambda = 0.71073$  Å) and the minimum and maximum transmissions are 0.575 and 0.620. The structure was solved, and the space group  $P-1$  (# 2) determined by the **ShelXT**<sup>1</sup> 2018/2 structure solution program using dual methods and refined by full matrix least squares minimisation on  $F^2$  using version 2018/3 of **ShelXL**<sup>3</sup> 2018/3. All non-hydrogen atoms were refined anisotropically. Hydrogen atom positions were calculated geometrically and refined using the riding model. Hydrogen atom positions were calculated geometrically and refined using the riding model. There is a single molecule in the asymmetric unit, which is represented by the reported sum formula. In other words: Z is 2 and Z' is 1.

**Table S76: Bond Lengths in Å for compound 2d.**

| Atom | Atom | Length/Å   | Atom | Atom | Length/Å   |
|------|------|------------|------|------|------------|
| Zn1  | O1   | 1.9397(10) | C1A  | C6A  | 1.3915(19) |
| Zn1  | O1A  | 1.9446(10) | C2   | C1   | 1.4213(19) |
| Zn1  | N1A  | 2.0043(11) | C2   | C3   | 1.4007(18) |
| Zn1  | N1   | 2.0133(11) | C1   | C6   | 1.3944(19) |
| O1   | C2   | 1.3296(16) | N3   | C12  | 1.333(3)   |
| O1A  | C2A  | 1.3290(16) | N3   | C16  | 1.334(3)   |
| N2   | C7   | 1.3203(17) | C8   | C11  | 1.5289(19) |
| N2   | C8   | 1.4681(18) | C9   | C10  | 1.521(2)   |
| N2   | C9   | 1.4778(17) | C4   | C5   | 1.385(2)   |
| N2A  | C7A  | 1.3207(17) | C4   | C3   | 1.384(2)   |
| N2A  | C9A  | 1.4763(17) | C10  | C11  | 1.521(2)   |
| N2A  | C8A  | 1.4647(18) | C5   | C6   | 1.3893(19) |
| N1A  | C1A  | 1.4319(17) | C5A  | C6A  | 1.390(2)   |
| N1A  | C7A  | 1.3074(17) | C9A  | C10A | 1.518(2)   |
| N1   | C1   | 1.4314(16) | C14  | C13  | 1.372(3)   |
| N1   | C7   | 1.3114(17) | C14  | C15  | 1.376(3)   |
| C3A  | C4A  | 1.384(2)   | C8A  | C11A | 1.530(2)   |
| C3A  | C2A  | 1.4007(19) | C11A | C10A | 1.518(2)   |
| C4A  | C5A  | 1.386(2)   | C13  | C12  | 1.380(3)   |
| C1A  | C2A  | 1.4208(19) | C15  | C16  | 1.377(3)   |

**Table S77: Bond Angles in ° for compound 2d.**

| Atom | Atom | Atom | Angle/°   | Atom | Atom | Atom | Angle/°  |
|------|------|------|-----------|------|------|------|----------|
| O1   | Zn1  | O1A  | 118.09(4) | O1   | Zn1  | N1   | 86.81(4) |
| O1   | Zn1  | N1A  | 120.15(4) | O1A  | Zn1  | N1A  | 86.71(4) |

| Atom | Atom | Atom | Angle/°    | Atom | Atom | Atom | Angle/°    |
|------|------|------|------------|------|------|------|------------|
| O1A  | Zn1  | N1   | 115.57(4)  | C3   | C2   | C1   | 117.95(12) |
| N1A  | Zn1  | N1   | 132.83(4)  | N1A  | C7A  | N2A  | 125.20(12) |
| C2   | O1   | Zn1  | 109.82(8)  | C2   | C1   | N1   | 114.96(11) |
| C2A  | O1A  | Zn1  | 110.00(8)  | C6   | C1   | N1   | 125.34(12) |
| C7   | N2   | C8   | 125.60(11) | C6   | C1   | C2   | 119.70(12) |
| C7   | N2   | C9   | 122.29(12) | C12  | N3   | C16  | 116.45(16) |
| C8   | N2   | C9   | 112.00(11) | N1   | C7   | N2   | 125.00(12) |
| C7A  | N2A  | C9A  | 121.73(12) | N2   | C8   | C11  | 103.38(11) |
| C7A  | N2A  | C8A  | 125.50(12) | N2   | C9   | C10  | 102.44(11) |
| C8A  | N2A  | C9A  | 112.26(11) | C3   | C4   | C5   | 120.26(13) |
| C1A  | N1A  | Zn1  | 107.37(8)  | C9   | C10  | C11  | 103.15(12) |
| C7A  | N1A  | Zn1  | 133.22(9)  | C4   | C5   | C6   | 119.61(13) |
| C7A  | N1A  | C1A  | 119.35(11) | C4   | C3   | C2   | 121.45(13) |
| C1   | N1   | Zn1  | 106.81(8)  | C4A  | C5A  | C6A  | 119.82(14) |
| C7   | N1   | Zn1  | 133.82(9)  | C5   | C6   | C1   | 120.93(13) |
| C7   | N1   | C1   | 119.04(11) | N2A  | C9A  | C10A | 103.28(12) |
| C4A  | C3A  | C2A  | 121.48(13) | C10  | C11  | C8   | 103.75(12) |
| C3A  | C4A  | C5A  | 119.93(13) | C13  | C14  | C15  | 119.11(17) |
| C2A  | C1A  | N1A  | 115.03(11) | N2A  | C8A  | C11A | 103.31(12) |
| C6A  | C1A  | N1A  | 125.51(12) | C5A  | C6A  | C1A  | 121.06(14) |
| C6A  | C1A  | C2A  | 119.44(12) | C10A | C11A | C8A  | 103.85(12) |
| O1A  | C2A  | C3A  | 120.99(12) | C14  | C13  | C12  | 118.36(18) |
| O1A  | C2A  | C1A  | 120.76(12) | C11A | C10A | C9A  | 104.19(12) |
| C3A  | C2A  | C1A  | 118.25(12) | C14  | C15  | C16  | 118.31(19) |
| O1   | C2   | C1   | 121.04(12) | N3   | C12  | C13  | 123.85(19) |
| O1   | C2   | C3   | 121.00(12) | N3   | C16  | C15  | 123.91(19) |

**Table S78:** Torsion Angles in ° for **compound 2d**.

| Atom | Atom | Atom | Atom | Angle/°     |
|------|------|------|------|-------------|
| Zn1  | O1   | C2   | C1   | -1.60(15)   |
| Zn1  | O1   | C2   | C3   | 177.09(10)  |
| Zn1  | O1A  | C2A  | C3A  | -175.96(10) |
| Zn1  | O1A  | C2A  | C1A  | 3.83(15)    |
| Zn1  | N1A  | C1A  | C2A  | -0.87(13)   |
| Zn1  | N1A  | C1A  | C6A  | 177.43(12)  |
| Zn1  | N1A  | C7A  | N2A  | -7.4(2)     |
| Zn1  | N1   | C1   | C2   | 7.45(13)    |
| Zn1  | N1   | C1   | C6   | -172.20(11) |
| Zn1  | N1   | C7   | N2   | -12.7(2)    |
| O1   | C2   | C1   | N1   | -4.32(18)   |
| O1   | C2   | C1   | C6   | 175.35(12)  |
| O1   | C2   | C3   | C4   | -176.43(13) |
| N2   | C8   | C11  | C10  | 27.86(15)   |
| N2   | C9   | C10  | C11  | 34.56(14)   |
| N2A  | C9A  | C10A | C11A | 29.46(15)   |
| N2A  | C8A  | C11A | C10A | 29.25(15)   |
| N1A  | C1A  | C2A  | O1A  | -2.02(18)   |
| N1A  | C1A  | C2A  | C3A  | 177.78(11)  |
| N1A  | C1A  | C6A  | C5A  | -177.40(13) |
| N1   | C1   | C6   | C5   | -178.64(13) |
| C3A  | C4A  | C5A  | C6A  | -0.9(2)     |
| C4A  | C3A  | C2A  | O1A  | 179.46(13)  |
| C4A  | C3A  | C2A  | C1A  | -0.3(2)     |
| C4A  | C5A  | C6A  | C1A  | -0.1(2)     |
| C1A  | N1A  | C7A  | N2A  | 175.95(12)  |
| C2A  | C3A  | C4A  | C5A  | 1.1(2)      |
| C2A  | C1A  | C6A  | C5A  | 0.8(2)      |
| C2   | C1   | C6   | C5   | 1.7(2)      |

| Atom | Atom | Atom | Atom | Angle/°     |
|------|------|------|------|-------------|
| C7A  | N2A  | C9A  | C10A | 160.93(13)  |
| C7A  | N2A  | C8A  | C11A | 176.86(13)  |
| C7A  | N1A  | C1A  | C2A  | 176.55(12)  |
| C7A  | N1A  | C1A  | C6A  | -5.1(2)     |
| C1   | N1   | C7   | N2   | 174.86(12)  |
| C1   | C2   | C3   | C4   | 2.3(2)      |
| C7   | N2   | C8   | C11  | 177.39(13)  |
| C7   | N2   | C9   | C10  | 158.69(13)  |
| C7   | N1   | C1   | C2   | -178.23(12) |
| C7   | N1   | C1   | C6   | 2.1(2)      |
| C8   | N2   | C7   | N1   | -0.8(2)     |
| C8   | N2   | C9   | C10  | -17.84(15)  |
| C9   | N2   | C7   | N1   | -176.89(12) |
| C9   | N2   | C8   | C11  | -6.21(15)   |
| C9   | C10  | C11  | C8   | -39.17(15)  |
| C4   | C5   | C6   | C1   | 1.1(2)      |
| C5   | C4   | C3   | C2   | 0.5(2)      |
| C3   | C2   | C1   | N1   | 176.95(12)  |
| C3   | C2   | C1   | C6   | -3.38(19)   |
| C3   | C4   | C5   | C6   | -2.3(2)     |
| C9A  | N2A  | C7A  | N1A  | -175.02(12) |
| C9A  | N2A  | C8A  | C11A | -11.21(15)  |
| C14  | C13  | C12  | N3   | -1.3(3)     |
| C14  | C15  | C16  | N3   | -0.6(3)     |
| C8A  | N2A  | C7A  | N1A  | -3.8(2)     |
| C8A  | N2A  | C9A  | C10A | -11.35(15)  |
| C8A  | C11A | C10A | C9A  | -36.80(16)  |
| C6A  | C1A  | C2A  | O1A  | 179.57(12)  |
| C6A  | C1A  | C2A  | C3A  | -0.63(19)   |
| C13  | C14  | C15  | C16  | 0.2(3)      |
| C15  | C14  | C13  | C12  | 0.7(3)      |
| C12  | N3   | C16  | C15  | 0.1(3)      |
| C16  | N3   | C12  | C13  | 0.9(3)      |

## Crystal Data and Experimental

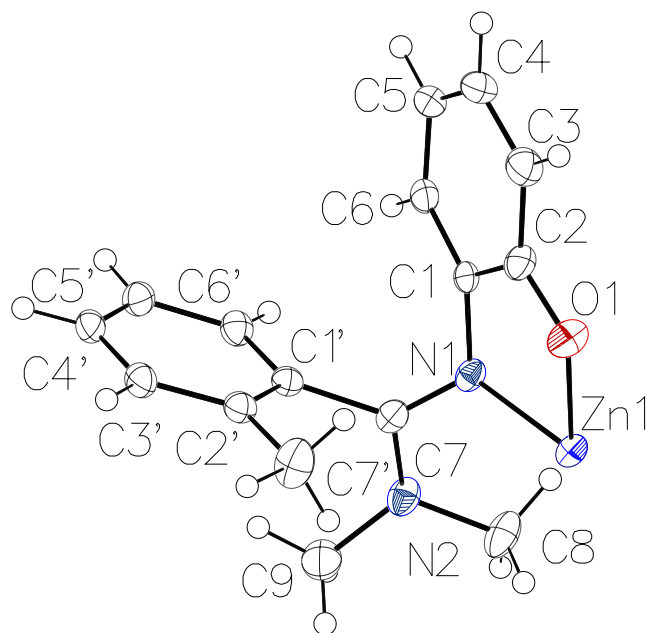

**Figure S135:** ORTEP view of compound **3d**

**Experimental.** Single clear light colourless plate-shaped crystals of **compound 3d** recrystallised from DCM by slow evaporation. A suitable crystal with dimensions 0.19 x 0.16 x 0.09 mm<sup>3</sup> was selected and mounted on a MITIGEN holder oil on a Nonius Kappa Apex II diffractometer. The crystal was kept at a steady  $T = 110.0(0)$  K during data collection. The structure was solved with the **ShelXT**<sup>1</sup> solution program using dual methods and by using **Olex2**<sup>2</sup> 1.5 as the graphical interface. The model was refined with **ShelXL**<sup>3</sup> 2018/3 using full matrix least squares minimisation on  **$F^2$** .

**Crystal Data.** C<sub>32</sub>H<sub>34</sub>N<sub>4</sub>O<sub>2</sub>Zn,  $M_r = 572.00$ , monoclinic,  $C2/c$  (No. 15),  $a = 9.5932(7)$  Å,  $b = 12.3033(9)$  Å,  $c = 24.3137(19)$  Å,  $\beta = 99.317(2)^\circ$ ,  $\alpha = \gamma = 90^\circ$ ,  $V = 2831.8(4)$  Å<sup>3</sup>,  $T = 110.0(0)$  K,  $Z = 4$ ,  $Z' = 0.5$ ,  $\mu(\text{Mo } K_{\alpha 1}) = 0.903$ , 24097 reflections measured, 3244 unique ( $R_{\text{int}} = 0.0577$ ) which were used in all calculations. The final  $wR_2$  was 0.0929 (all data) and  $R_1$  was 0.0385 ( $I \geq 2 \sigma(I)$ ).

**Table S79: Experimental parameters**

| Compound                              | <b>3d</b>                                                        |
|---------------------------------------|------------------------------------------------------------------|
| CCDC                                  | <b>2182084</b>                                                   |
| Formula                               | C <sub>32</sub> H <sub>34</sub> N <sub>4</sub> O <sub>2</sub> Zn |
| $D_{\text{calc.}} / \text{g cm}^{-3}$ | 1.342                                                            |
| $\mu / \text{mm}^{-1}$                | 0.903                                                            |
| Formula Weight                        | 572.00                                                           |
| Colour                                | clear light colourless                                           |
| Shape                                 | plate-shaped                                                     |
| Size/mm <sup>3</sup>                  | 0.19x0.16x0.09                                                   |
| $T/\text{K}$                          | 110.0(0)                                                         |
| Crystal System                        | monoclinic                                                       |
| Space Group                           | $C2/c$                                                           |
| $a/\text{Å}$                          | 9.5932(7)                                                        |
| $b/\text{Å}$                          | 12.3033(9)                                                       |
| $c/\text{Å}$                          | 24.3137(19)                                                      |
| $\alpha/^\circ$                       | 90                                                               |
| $\beta/^\circ$                        | 99.317(2)                                                        |
| $\gamma/^\circ$                       | 90                                                               |
| $V/\text{Å}^3$                        | 2831.8(4)                                                        |
| $Z$                                   | 4                                                                |
| $Z'$                                  | 0.5                                                              |
| Wavelength/Å                          | 0.71073                                                          |
| Radiation type                        | Mo $K_{\alpha 1}$                                                |
| $\Theta_{\text{min}}/^\circ$          | 2.715                                                            |
| $\Theta_{\text{max}}/^\circ$          | 27.518                                                           |
| Measured Refl's.                      | 24097                                                            |
| Indep't Refl's                        | 3244                                                             |
| Refl's $I \geq 2 \sigma(I)$           | 2621                                                             |
| $R_{\text{int}}$                      | 0.0577                                                           |
| Parameters                            | 180                                                              |
| Restraints                            | 0                                                                |
| Largest Peak                          | 0.887                                                            |
| Deepest Hole                          | -0.451                                                           |
| GooF                                  | 1.046                                                            |
| $wR_2$ (all data)                     | 0.0929                                                           |
| $wR_2$                                | 0.0862                                                           |
| $R_1$ (all data)                      | 0.0563                                                           |
| $R_1$                                 | 0.0385                                                           |

**Table S80: Structure Quality Indicators**

|                     |                                 |       |                 |      |          |       |            |       |
|---------------------|---------------------------------|-------|-----------------|------|----------|-------|------------|-------|
| <b>Reflections:</b> | d min (Mo)<br>2 $\theta$ =55.0° | 0.77  | I/ $\sigma$ (I) | 23.4 | Rint     | 5.77% | Full 50.5° | 99.9  |
| <b>Refinement:</b>  | Shift                           | 0.001 | Max Peak        | 0.9  | Min Peak | -0.5  | Goof       | 1.046 |

A clear light colourless plate-shaped-shaped crystal with dimensions 0.19 x 0.16 x 0.09 mm<sup>3</sup> was mounted on a MITIGEN holder oil. Data were collected using a Nonius Kappa Apex II diffractometer operating at  $T = 110.0(0)$  K. Data were measured using  $\phi$  and  $\omega$  scans with Mo K $\alpha_1$  radiation. The diffraction pattern was indexed and the total number of runs, and images was based on the strategy calculation from the program **APEX4**<sup>6</sup>. The maximum resolution that was achieved was  $\theta = 27.518^\circ$  (0.77 Å). The unit cell was refined using **SAINT V8.40B**<sup>4</sup> on 5183 reflections, 22% of the observed reflections. Data reduction, scaling and absorption corrections were performed using SAINT V8.40B<sup>4</sup>. The final completeness is 99.90 % out to 27.518° in  $\theta$ . **SADABS-2016/2**<sup>5</sup> was used for absorption correction.  $wR_2(\text{int})$  was 0.0650 before and 0.0579 after correction. The Ratio of minimum to maximum transmission is 0.9186. The absorption coefficient  $\mu$  of this material is 0.903 mm<sup>-1</sup> at this wavelength ( $\lambda = 0.71073\text{Å}$ ) and the minimum and maximum transmissions are 0.816 and 0.888. The structure was solved, and the space group  $C2/c$  (# 15) determined by the **ShelXT**<sup>1</sup> structure solution program using dual methods and refined by full matrix least squares minimisation on  $F^2$  using version 2018/3 of **ShelXL**<sup>3</sup> 2018/3. All non-hydrogen atoms were refined anisotropically. Hydrogen atom positions were calculated geometrically and refined using the riding model. The value of Z' is 0.5. This means that only half of the formula unit is present in the asymmetric unit, with the other half consisting of symmetry equivalent atoms.

**Table S81: Bond Lengths in Å for compound 3d.**

| Atom | Atom            | Length/Å   | Atom | Atom | Length/Å                  |
|------|-----------------|------------|------|------|---------------------------|
| Zn1  | O1              | 1.9195(15) | C1'  | C6'  | 1.387(3)                  |
| Zn1  | O1 <sup>1</sup> | 1.9195(15) | C1'  | C7   | 1.504(3)                  |
| Zn1  | N1 <sup>1</sup> | 2.0422(17) | C2   | C3   | 1.400(3)                  |
| Zn1  | N1              | 2.0422(17) | C2'  | C3'  | 1.394(3)                  |
| O1   | C2              | 1.334(3)   | C2'  | C7'  | 1.497(3)                  |
| N1   | C1              | 1.433(3)   | C3   | C4   | 1.388(3)                  |
| N1   | C7              | 1.316(3)   | C3'  | C4'  | 1.377(3)                  |
| N2   | C7              | 1.339(3)   | C4   | C5   | 1.386(4)                  |
| N2   | C8              | 1.460(3)   | C4'  | C5'  | 1.382(3)                  |
| N2   | C9              | 1.463(3)   | C5   | C6   | 1.386(3)                  |
| C1   | C2              | 1.415(3)   | C5'  | C6'  | 1.393(3)                  |
| C1   | C6              | 1.392(3)   | ---- |      |                           |
| C1'  | C2'             | 1.400(3)   |      |      | <sup>1</sup> 1-x,+y,3/2-z |

**Table S82: Bond Angles in ° for compound 3d.**

| Atom            | Atom | Atom            | Angle/°    | Atom | Atom | Atom | Angle/°    |
|-----------------|------|-----------------|------------|------|------|------|------------|
| O1              | Zn1  | O1 <sup>1</sup> | 120.87(10) | C8   | N2   | C9   | 114.52(18) |
| O1 <sup>1</sup> | Zn1  | N1              | 120.16(7)  | C2   | C1   | N1   | 115.64(18) |
| O1 <sup>1</sup> | Zn1  | N1 <sup>1</sup> | 86.24(7)   | C6   | C1   | N1   | 123.9(2)   |
| O1              | Zn1  | N1              | 86.24(7)   | C6   | C1   | C2   | 119.9(2)   |
| O1              | Zn1  | N1 <sup>1</sup> | 120.16(7)  | C2'  | C1'  | C7   | 118.18(19) |
| N1              | Zn1  | N1 <sup>1</sup> | 127.45(10) | C6'  | C1'  | C2'  | 120.6(2)   |
| C2              | O1   | Zn1             | 110.58(13) | C6'  | C1'  | C7   | 121.17(19) |
| C1              | N1   | Zn1             | 105.72(13) | O1   | C2   | C1   | 120.19(19) |
| C7              | N1   | Zn1             | 124.25(14) | O1   | C2   | C3   | 121.5(2)   |
| C7              | N1   | C1              | 121.50(17) | C3   | C2   | C1   | 118.3(2)   |
| C7              | N2   | C8              | 121.29(18) | C1'  | C2'  | C7'  | 120.91(19) |
| C7              | N2   | C9              | 123.77(18) | C3'  | C2'  | C1'  | 117.9(2)   |

| Atom | Atom | Atom | Angle/°  | Atom | Atom | Atom | Angle/°                   |
|------|------|------|----------|------|------|------|---------------------------|
| C3'  | C2'  | C7'  | 121.2(2) | C5   | C6   | C1   | 120.7(2)                  |
| C4   | C3   | C2   | 120.9(2) | C1'  | C6'  | C5'  | 120.1(2)                  |
| C4'  | C3'  | C2'  | 121.9(2) | N1   | C7   | N2   | 119.81(19)                |
| C5   | C4   | C3   | 120.3(2) | N1   | C7   | C1'  | 123.53(18)                |
| C3'  | C4'  | C5'  | 119.7(2) | N2   | C7   | C1'  | 116.59(18)                |
| C4   | C5   | C6   | 119.7(2) | ---- |      |      |                           |
| C4'  | C5'  | C6'  | 119.8(2) |      |      |      | <sup>1</sup> 1-x,+y,3/2-z |

**Table S83:** Torsion Angles in ° for **compound 3d**.

| Atom | Atom | Atom | Atom | Angle/°     |
|------|------|------|------|-------------|
| Zn1  | O1   | C2   | C1   | 10.8(2)     |
| Zn1  | O1   | C2   | C3   | -166.97(18) |
| Zn1  | N1   | C1   | C2   | -7.1(2)     |
| Zn1  | N1   | C1   | C6   | 164.54(17)  |
| Zn1  | N1   | C7   | N2   | -52.6(3)    |
| Zn1  | N1   | C7   | C1'  | 124.24(18)  |
| O1   | C2   | C3   | C4   | 176.4(2)    |
| N1   | C1   | C2   | O1   | -2.1(3)     |
| N1   | C1   | C2   | C3   | 175.78(19)  |
| N1   | C1   | C6   | C5   | -174.74(19) |
| C1   | N1   | C7   | N2   | 164.13(18)  |
| C1   | N1   | C7   | C1'  | -19.1(3)    |
| C1   | C2   | C3   | C4   | -1.4(3)     |
| C1'  | C2'  | C3'  | C4'  | -2.4(3)     |
| C2   | C1   | C6   | C5   | -3.5(3)     |
| C2   | C3   | C4   | C5   | -1.3(4)     |
| C2'  | C1'  | C6'  | C5'  | 1.5(3)      |
| C2'  | C1'  | C7   | N1   | -77.2(3)    |
| C2'  | C1'  | C7   | N2   | 99.8(2)     |
| C2'  | C3'  | C4'  | C5'  | 0.9(3)      |
| C3   | C4   | C5   | C6   | 1.7(4)      |
| C3'  | C4'  | C5'  | C6'  | 1.9(3)      |
| C4   | C5   | C6   | C1   | 0.7(3)      |
| C4'  | C5'  | C6'  | C1'  | -3.1(3)     |
| C6   | C1   | C2   | O1   | -174.04(19) |
| C6   | C1   | C2   | C3   | 3.8(3)      |
| C6'  | C1'  | C2'  | C3'  | 1.3(3)      |
| C6'  | C1'  | C2'  | C7'  | -179.3(2)   |
| C6'  | C1'  | C7   | N1   | 105.9(2)    |
| C6'  | C1'  | C7   | N2   | -77.2(3)    |
| C7   | N1   | C1   | C2   | 142.0(2)    |
| C7   | N1   | C1   | C6   | -46.3(3)    |
| C7   | C1'  | C2'  | C3'  | -175.73(18) |
| C7   | C1'  | C2'  | C7'  | 3.7(3)      |
| C7   | C1'  | C6'  | C5'  | 178.35(19)  |
| C7'  | C2'  | C3'  | C4'  | 178.1(2)    |
| C8   | N2   | C7   | N1   | -5.8(3)     |
| C8   | N2   | C7   | C1'  | 177.17(19)  |
| C9   | N2   | C7   | N1   | 166.3(2)    |
| C9   | N2   | C7   | C1'  | -10.7(3)    |



## Crystal Data and Experimental

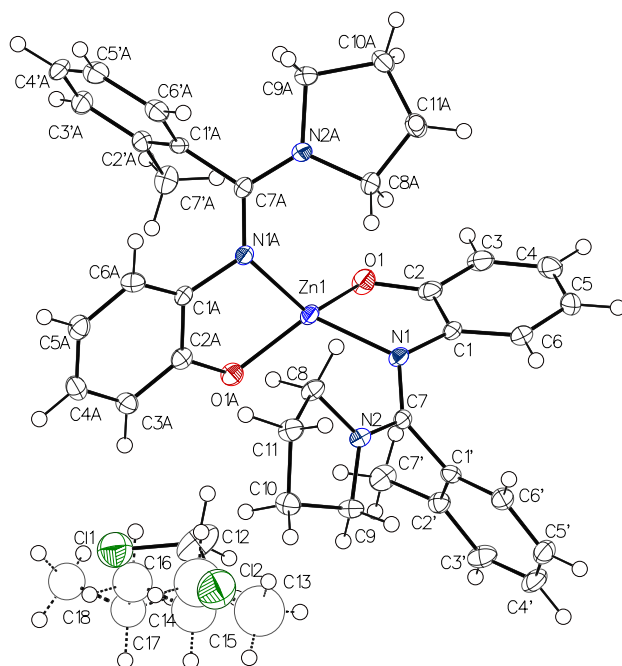

**Figure S136:** ORTEP view of compound **4d**

**Experimental.** Single clear light colourless prism-shaped crystals of **compound 4d** recrystallised from a mixture of DCM and hexane by slow evaporation. A suitable crystal with dimensions 0.25 x 0.13 x 0.09 mm<sup>3</sup> was selected and mounted on a MITIGEN holder oil on a Bruker D8 VENTURE diffractometer. The crystal was kept at a steady  $T = 100.0(1)$  K during data collection. The structure was solved with the **ShelXT**<sup>1</sup> solution program using dual methods and by using **Olex2**<sup>2</sup> 1.5 as the graphical interface. The model was refined with **ShelXL**<sup>3</sup> 2018/3 using full matrix least squares minimisation on  $F^2$ .

**Crystal Data.** C<sub>76.5</sub>H<sub>86</sub>Cl<sub>3</sub>N<sub>8</sub>O<sub>4</sub>Zn<sub>2</sub>,  $M_r = 1418.62$ , triclinic,  $P-1$  (No. 2),  $a = 8.2841(6)$  Å,  $b = 10.5138(8)$  Å,  $c = 19.9849(15)$  Å,  $\alpha = 89.305(3)^\circ$ ,  $\beta = 80.720(4)^\circ$ ,  $\gamma = 82.276(4)^\circ$ ,  $V = 1702.2(2)$  Å<sup>3</sup>,  $T = 100.0(1)$  K,  $Z = 1$ ,  $Z' = 0.5$ ,  $\mu(\text{Cu } K\alpha_1) = 2.399$ , 10719 reflections measured, 10719 unique which were used in all calculations. The final  $wR_2$  was 0.1636 (all data) and  $R_1$  was 0.0625 ( $I \geq 2 \sigma(I)$ ).

**Table S84: Experimental parameters**

|                                       |                                                                                                 |
|---------------------------------------|-------------------------------------------------------------------------------------------------|
| <b>Compound</b>                       | <b>4d</b>                                                                                       |
| <b>CCDC</b>                           | <b>2182085</b>                                                                                  |
| Formula                               | C <sub>76.5</sub> H <sub>86</sub> Cl <sub>3</sub> N <sub>8</sub> O <sub>4</sub> Zn <sub>2</sub> |
| $D_{\text{calc.}} / \text{g cm}^{-3}$ | 1.384                                                                                           |
| $\mu / \text{mm}^{-1}$                | 2.399                                                                                           |
| Formula Weight                        | 1418.62                                                                                         |
| Colour                                | clear light colourless                                                                          |
| Shape                                 | prism-shaped                                                                                    |
| Size/mm <sup>3</sup>                  | 0.25x0.13x0.09                                                                                  |
| $T/\text{K}$                          | 100.0(1)                                                                                        |
| Crystal System                        | triclinic                                                                                       |
| Space Group                           | $P-1$                                                                                           |
| $a/\text{Å}$                          | 8.2841(6)                                                                                       |
| $b/\text{Å}$                          | 10.5138(8)                                                                                      |
| $c/\text{Å}$                          | 19.9849(15)                                                                                     |
| $\alpha/^\circ$                       | 89.305(3)                                                                                       |
| $\beta/^\circ$                        | 80.720(4)                                                                                       |
| $\gamma/^\circ$                       | 82.276(4)                                                                                       |
| $V/\text{Å}^3$                        | 1702.2(2)                                                                                       |
| $Z$                                   | 1                                                                                               |
| $Z'$                                  | 0.5                                                                                             |
| Wavelength/Å                          | 1.54178                                                                                         |
| Radiation type                        | Cu $K\alpha_1$                                                                                  |
| $\theta_{\text{min}}/^\circ$          | 4.781                                                                                           |
| $\theta_{\text{max}}/^\circ$          | 66.897                                                                                          |
| Measured Refl's.                      | 10719                                                                                           |
| Indep't Refl's                        | 10719                                                                                           |
| Refl's $I \geq 2 \sigma(I)$           | 9531                                                                                            |
| $R_{\text{int}}$                      | .                                                                                               |
| Parameters                            | 432                                                                                             |
| Restraints                            | 5                                                                                               |
| Largest Peak                          | 0.895                                                                                           |
| Deepest Hole                          | -1.007                                                                                          |
| Goof                                  | 1.078                                                                                           |
| $wR_2$ (all data)                     | 0.1636                                                                                          |
| $wR_2$                                | 0.1573                                                                                          |
| $R_1$ (all data)                      | 0.0716                                                                                          |
| $R_1$                                 | 0.0625                                                                                          |

**Table S85: Structure Quality Indicators**

|                     |                                             |       |                 |      |                  |       |             |       |
|---------------------|---------------------------------------------|-------|-----------------|------|------------------|-------|-------------|-------|
| <b>Reflections:</b> | d min (Cu $\lambda$ )<br>2 $\theta$ =133.8° | 0.84  | I/ $\sigma$ (I) | 34.5 | R <sub>int</sub> | 6.13% | Full 133.8° | 98.1  |
| <b>Refinement:</b>  | Shift                                       | 0.000 | Max Peak        | 0.9  | Min Peak         | -1.0  | Goof        | 1.078 |

A clear light colourless prism-shaped crystal with dimensions 0.25 x 0.13 x 0.09 mm<sup>3</sup> was mounted on a MITIGEN holder oil. Data were collected using a Bruker D8 VENTURE diffractometer operating at  $T = 100.0(1)$  K. Data were measured using  $\phi$  and  $\omega$  scans with Cu K $\alpha_1$  radiation. The diffraction pattern was indexed and the total number of runs, and images was based on the strategy calculation from the program **APEX4**<sup>6</sup>. The maximum resolution that was achieved was  $\theta = 66.897^\circ$  (0.84 Å). The unit cell was refined using **SAINT V8.40B**<sup>4</sup> on 9989 reflections, 93% of the observed reflections. Data reduction, scaling and absorption corrections were performed using **SAINT V8.40B**<sup>4</sup>. The final completeness is 98.10 % out to 66.897° in  $\theta$ . A multi-scan absorption correction was performed using **TWINABS-2012/1**<sup>9</sup> was used for absorption correction. For component 1:  $wR_2(\text{int})$  was 0.1178 before and 0.0638 after correction. For component 2:  $wR_2(\text{int})$  was 0.1014 before and 0.0772 after correction. The Ratio of minimum to maximum transmission is 0.80. Final HKLF 4 output contains 44641 reflections,  $R_{\text{int}} = 0.0510$  (34520 with  $I > 3\text{sig}(I)$ ,  $R_{\text{int}} = 0.0474$ ). The absorption coefficient  $\mu$  of this material is 2.399 mm<sup>-1</sup> at this wavelength ( $\lambda = 1.54178\text{Å}$ ) and the minimum and maximum transmissions are 0.570 and 0.710. The structure was solved, and the space group  $P-1$  (# 2) determined by the **ShelXT**<sup>1</sup> structure solution program using dual methods and refined by full matrix least squares minimisation on  $F^2$  using version 2018/3 of **ShelXL**<sup>3</sup> 2018/3. All non-hydrogen atoms were refined anisotropically excepted disordered hexane solvent. Hydrogen atom positions were calculated geometrically and refined using the riding model. The value of  $Z'$  is 0.5. This means that only half of the formula unit is present in the asymmetric unit, with the other half consisting of symmetry equivalent atoms. An idealized molecular geometry has been used to model disordered hexane part. Both solvent hexane/DCM were found disordered on the same site 25.0(1)%/75.0(1)%. Several crystals examined proved to have multiple domains. The final data crystal, while still a multiple, could be described having primarily two domains and was treated as such. Orientation matrices for the two domains were determined using the program **CELL\_NOW**<sup>10</sup> and the data were processed further using **TWINABS**<sup>9</sup>. HKLF 5 was employed, BASF specifies the fractional volume contributions of the various twin components. The crystal was refined as a non-merohedral twin with a minor twin component of 0.1940 (9). The value of  $Z'$  is 0.5. This means that only half of the formula unit is present in the asymmetric unit, with the other half consisting of symmetry equivalent atoms.

**Table S86: Bond Lengths in Å for compound 4d.**

| Atom | Atom | Length/Å | Atom | Atom | Length/Å |
|------|------|----------|------|------|----------|
| Zn1  | O1   | 1.923(3) | C1   | C2   | 1.431(6) |
| Zn1  | O1A  | 1.927(3) | C1   | C6   | 1.388(6) |
| Zn1  | N1   | 2.049(3) | C1'  | C2'  | 1.395(6) |
| Zn1  | N1A  | 2.045(3) | C1'  | C6'  | 1.396(6) |
| O1   | C2   | 1.334(5) | C1'  | C7   | 1.501(5) |
| O1A  | C2A  | 1.329(5) | C1'A | C2'A | 1.398(6) |
| N1   | C1   | 1.423(5) | C1'A | C6'A | 1.392(6) |
| N1   | C7   | 1.324(5) | C1'A | C7A  | 1.498(5) |
| N1A  | C1A  | 1.436(5) | C1A  | C2A  | 1.424(5) |
| N1A  | C7A  | 1.326(5) | C1A  | C6A  | 1.387(6) |
| N2   | C7   | 1.330(5) | C2   | C3   | 1.398(6) |
| N2   | C8   | 1.467(5) | C2'  | C3'  | 1.396(6) |
| N2   | C9   | 1.480(5) | C2'  | C7'  | 1.499(6) |
| N2A  | C7A  | 1.335(5) | C2'A | C3'A | 1.390(6) |
| N2A  | C8A  | 1.472(5) | C2'A | C7'A | 1.531(6) |
| N2A  | C9A  | 1.487(5) | C2A  | C3A  | 1.398(6) |

| Atom | Atom | Length/Å |
|------|------|----------|
| C3   | C4   | 1.391(7) |
| C3'  | C4'  | 1.388(6) |
| C3'A | C4'A | 1.369(7) |
| C3A  | C4A  | 1.372(6) |
| C4   | C5   | 1.385(7) |
| C4'  | C5'  | 1.380(7) |
| C4'A | C5'A | 1.379(7) |
| C4A  | C5A  | 1.393(6) |
| C5   | C6   | 1.391(6) |
| C5'  | C6'  | 1.384(6) |
| C5'A | C6'A | 1.403(6) |
| C5A  | C6A  | 1.385(6) |
| C8   | C11  | 1.519(6) |

| Atom | Atom | Length/Å  |
|------|------|-----------|
| C8A  | C11A | 1.519(6)  |
| C9   | C10  | 1.514(6)  |
| C9A  | C10A | 1.530(6)  |
| C10  | C11  | 1.524(6)  |
| C10A | C11A | 1.526(6)  |
| Cl1  | C12  | 1.712(10) |
| Cl2  | C12  | 1.748(8)  |
| C18  | C17  | 1.5341    |
| C13  | C14  | 1.5333    |
| C14  | C15  | 1.5348    |
| C15  | C16  | 1.5348    |
| C16  | C17  | 1.5349    |

**Table S87:** Bond Angles in ° for compound 4d.

| Atom | Atom | Atom | Angle/°    |
|------|------|------|------------|
| O1   | Zn1  | O1A  | 121.16(13) |
| O1   | Zn1  | N1   | 86.44(13)  |
| O1   | Zn1  | N1A  | 124.54(12) |
| O1A  | Zn1  | N1   | 118.27(12) |
| O1A  | Zn1  | N1A  | 86.17(12)  |
| N1A  | Zn1  | N1   | 124.41(13) |
| C2   | O1   | Zn1  | 110.2(2)   |
| C2A  | O1A  | Zn1  | 110.2(2)   |
| C1   | N1   | Zn1  | 106.1(2)   |
| C7   | N1   | Zn1  | 123.7(3)   |
| C7   | N1   | C1   | 120.9(3)   |
| C1A  | N1A  | Zn1  | 105.7(2)   |
| C7A  | N1A  | Zn1  | 128.9(3)   |
| C7A  | N1A  | C1A  | 121.5(3)   |
| C7   | N2   | C8   | 123.6(3)   |
| C7   | N2   | C9   | 124.9(3)   |
| C8   | N2   | C9   | 111.3(3)   |
| C7A  | N2A  | C8A  | 124.4(3)   |
| C7A  | N2A  | C9A  | 124.4(3)   |
| C8A  | N2A  | C9A  | 111.2(3)   |
| N1   | C1   | C2   | 115.1(3)   |
| C6   | C1   | N1   | 124.4(4)   |
| C6   | C1   | C2   | 120.1(4)   |
| C2'  | C1'  | C6'  | 121.5(4)   |
| C2'  | C1'  | C7   | 118.2(3)   |
| C6'  | C1'  | C7   | 120.1(4)   |
| C2'A | C1'A | C7A  | 118.2(3)   |
| C6'A | C1'A | C2'A | 120.8(4)   |
| C6'A | C1'A | C7A  | 121.0(4)   |
| C2A  | C1A  | N1A  | 115.3(3)   |
| C6A  | C1A  | N1A  | 124.7(4)   |
| C6A  | C1A  | C2A  | 119.5(4)   |
| O1   | C2   | C1   | 120.8(4)   |
| O1   | C2   | C3   | 121.4(4)   |
| C3   | C2   | C1   | 117.8(4)   |
| C1'  | C2'  | C3'  | 117.3(4)   |
| C1'  | C2'  | C7'  | 121.9(4)   |
| C3'  | C2'  | C7'  | 120.8(4)   |
| C1'A | C2'A | C7'A | 120.6(4)   |
| C3'A | C2'A | C1'A | 118.1(4)   |

| Atom | Atom | Atom | Angle/°  |
|------|------|------|----------|
| C3'A | C2'A | C7'A | 121.4(4) |
| O1A  | C2A  | C1A  | 120.4(3) |
| O1A  | C2A  | C3A  | 121.5(4) |
| C3A  | C2A  | C1A  | 118.1(4) |
| C4   | C3   | C2   | 121.2(4) |
| C4'  | C3'  | C2'  | 121.6(4) |
| C4'A | C3'A | C2'A | 121.4(4) |
| C4A  | C3A  | C2A  | 121.5(4) |
| C5   | C4   | C3   | 120.4(4) |
| C5'  | C4'  | C3'  | 120.1(4) |
| C3'A | C4'A | C5'A | 121.0(4) |
| C3A  | C4A  | C5A  | 120.3(4) |
| C4   | C5   | C6   | 119.9(4) |
| C4'  | C5'  | C6'  | 119.7(4) |
| C4'A | C5'A | C6'A | 119.0(4) |
| C6A  | C5A  | C4A  | 119.4(4) |
| C1   | C6   | C5   | 120.6(4) |
| C5'  | C6'  | C1'  | 119.8(4) |
| C1'A | C6'A | C5'A | 119.7(4) |
| C5A  | C6A  | C1A  | 121.2(4) |
| N1   | C7   | N2   | 120.0(3) |
| N1   | C7   | C1'  | 124.1(3) |
| N2   | C7   | C1'  | 115.8(3) |
| N1A  | C7A  | N2A  | 120.6(3) |
| N1A  | C7A  | C1'A | 123.6(3) |
| N2A  | C7A  | C1'A | 115.7(3) |
| N2   | C8   | C11  | 102.7(3) |
| N2A  | C8A  | C11A | 103.6(3) |
| N2   | C9   | C10  | 103.4(3) |
| N2A  | C9A  | C10A | 103.4(3) |
| C9   | C10  | C11  | 103.3(3) |
| C11A | C10A | C9A  | 103.3(3) |
| C8   | C11  | C10  | 102.4(3) |
| C8A  | C11A | C10A | 103.4(3) |
| Cl1  | C12  | Cl2  | 115.2(6) |
| C13  | C14  | C15  | 113.3    |
| C16  | C15  | C14  | 113.7    |
| C15  | C16  | C17  | 113.7    |
| C18  | C17  | C16  | 113.3    |

**Table S88:** Torsion Angles in ° for **compound 4d**.

| Atom | Atom | Atom | Atom | Angle/°   |
|------|------|------|------|-----------|
| Zn1  | O1   | C2   | C1   | 10.0(5)   |
| Zn1  | O1   | C2   | C3   | -169.1(3) |
| Zn1  | O1A  | C2A  | C1A  | 13.5(4)   |
| Zn1  | O1A  | C2A  | C3A  | -164.4(3) |
| Zn1  | N1   | C1   | C2   | -6.6(4)   |
| Zn1  | N1   | C1   | C6   | 166.6(3)  |
| Zn1  | N1   | C7   | N2   | -52.3(5)  |
| Zn1  | N1   | C7   | C1'  | 124.6(3)  |
| Zn1  | N1A  | C1A  | C2A  | -7.2(4)   |
| Zn1  | N1A  | C1A  | C6A  | 164.1(3)  |
| Zn1  | N1A  | C7A  | N2A  | -39.2(5)  |
| Zn1  | N1A  | C7A  | C1'A | 137.3(3)  |
| O1   | C2   | C3   | C4   | 176.8(4)  |
| O1A  | C2A  | C3A  | C4A  | 177.5(4)  |
| N1   | C1   | C2   | O1   | -1.9(5)   |
| N1   | C1   | C2   | C3   | 177.2(4)  |
| N1   | C1   | C6   | C5   | -175.5(4) |
| N1A  | C1A  | C2A  | O1A  | -3.8(5)   |
| N1A  | C1A  | C2A  | C3A  | 174.1(3)  |
| N1A  | C1A  | C6A  | C5A  | -173.8(4) |
| N2   | C8   | C11  | C10  | -35.9(4)  |
| N2   | C9   | C10  | C11  | -29.7(4)  |
| N2A  | C8A  | C11A | C10A | -33.1(5)  |
| N2A  | C9A  | C10A | C11A | -29.8(4)  |
| C1   | N1   | C7   | N2   | 165.6(3)  |
| C1   | N1   | C7   | C1'  | -17.5(6)  |
| C1   | C2   | C3   | C4   | -2.3(6)   |
| C1'  | C2'  | C3'  | C4'  | -0.1(6)   |
| C1'A | C2'A | C3'A | C4'A | -0.5(6)   |
| C1A  | N1A  | C7A  | N2A  | 166.5(4)  |
| C1A  | N1A  | C7A  | C1'A | -17.1(6)  |
| C1A  | C2A  | C3A  | C4A  | -0.4(6)   |
| C2   | C1   | C6   | C5   | -2.6(6)   |
| C2   | C3   | C4   | C5   | -0.1(7)   |
| C2'  | C1'  | C6'  | C5'  | 1.3(6)    |
| C2'  | C1'  | C7   | N1   | -68.7(5)  |
| C2'  | C1'  | C7   | N2   | 108.3(4)  |
| C2'  | C3'  | C4'  | C5'  | 1.0(7)    |
| C2'A | C1'A | C6'A | C5'A | 1.6(6)    |
| C2'A | C1'A | C7A  | N1A  | -66.9(5)  |
| C2'A | C1'A | C7A  | N2A  | 109.7(4)  |
| C2'A | C3'A | C4'A | C5'A | 1.1(6)    |
| C2A  | C1A  | C6A  | C5A  | -2.8(6)   |
| C2A  | C3A  | C4A  | C5A  | -1.0(6)   |
| C3   | C4   | C5   | C6   | 1.3(7)    |
| C3'  | C4'  | C5'  | C6'  | -0.7(7)   |
| C3'A | C4'A | C5'A | C6'A | -0.4(6)   |
| C3A  | C4A  | C5A  | C6A  | 0.6(6)    |
| C4   | C5   | C6   | C1   | 0.1(6)    |
| C4'  | C5'  | C6'  | C1'  | -0.4(6)   |
| C4'A | C5'A | C6'A | C1'A | -0.9(6)   |
| C4A  | C5A  | C6A  | C1A  | 1.4(6)    |
| C6   | C1   | C2   | O1   | -175.5(4) |
| C6   | C1   | C2   | C3   | 3.7(6)    |
| C6'  | C1'  | C2'  | C3'  | -1.0(6)   |

| Atom | Atom | Atom | Atom | Angle/°   |
|------|------|------|------|-----------|
| C6'  | C1'  | C2'  | C7'  | 178.2(4)  |
| C6'  | C1'  | C7   | N1   | 116.1(4)  |
| C6'  | C1'  | C7   | N2   | -66.9(5)  |
| C6'A | C1'A | C2'A | C3'A | -0.8(6)   |
| C6'A | C1'A | C2'A | C7'A | -179.7(4) |
| C6'A | C1'A | C7A  | N1A  | 113.6(4)  |
| C6'A | C1'A | C7A  | N2A  | -69.7(5)  |
| C6A  | C1A  | C2A  | O1A  | -175.6(4) |
| C6A  | C1A  | C2A  | C3A  | 2.3(6)    |
| C7   | N1   | C1   | C2   | 141.3(4)  |
| C7   | N1   | C1   | C6   | -45.5(6)  |
| C7   | N2   | C8   | C11  | -165.8(4) |
| C7   | N2   | C9   | C10  | -168.8(4) |
| C7   | C1'  | C2'  | C3'  | -176.2(4) |
| C7   | C1'  | C2'  | C7'  | 3.1(6)    |
| C7   | C1'  | C6'  | C5'  | 176.4(4)  |
| C7'  | C2'  | C3'  | C4'  | -179.4(4) |
| C7'A | C2'A | C3'A | C4'A | 178.4(4)  |
| C7A  | N1A  | C1A  | C2A  | 152.3(4)  |
| C7A  | N1A  | C1A  | C6A  | -36.4(6)  |
| C7A  | N2A  | C8A  | C11A | -164.2(4) |
| C7A  | N2A  | C9A  | C10A | -171.5(4) |
| C7A  | C1'A | C2'A | C3'A | 179.7(3)  |
| C7A  | C1'A | C2'A | C7'A | 0.9(5)    |
| C7A  | C1'A | C6'A | C5'A | -179.0(4) |
| C8   | N2   | C7   | N1   | -7.2(6)   |
| C8   | N2   | C7   | C1'  | 175.6(3)  |
| C8   | N2   | C9   | C10  | 7.3(4)    |
| C8A  | N2A  | C7A  | N1A  | -4.6(6)   |
| C8A  | N2A  | C7A  | C1'A | 178.7(4)  |
| C8A  | N2A  | C9A  | C10A | 9.5(5)    |
| C9   | N2   | C7   | N1   | 168.4(4)  |
| C9   | N2   | C7   | C1'  | -8.8(5)   |
| C9   | N2   | C8   | C11  | 18.1(4)   |
| C9   | C10  | C11  | C8   | 41.1(4)   |
| C9A  | N2A  | C7A  | N1A  | 176.5(4)  |
| C9A  | N2A  | C7A  | C1'A | -0.2(6)   |
| C9A  | N2A  | C8A  | C11A | 14.7(5)   |
| C9A  | C10A | C11A | C8A  | 39.2(5)   |
| C13  | C14  | C15  | C16  | 180.0     |
| C14  | C15  | C16  | C17  | 180.0     |
| C15  | C16  | C17  | C18  | 180.0     |

**Table S89:** Atomic Occupancies for all atoms that are not fully occupied in **compound 4d**.

| Atom | Occupancy | Atom | Occupancy | Atom | Occupancy | Atom | Occupancy |
|------|-----------|------|-----------|------|-----------|------|-----------|
| C11  | 0.75      | H18B | 0.25      | H14A | 0.25      | H16B | 0.25      |
| C12  | 0.75      | H18C | 0.25      | H14B | 0.25      | C17  | 0.25      |
| C12  | 0.75      | C13  | 0.25      | C15  | 0.25      | H17A | 0.25      |
| H12A | 0.75      | H13A | 0.25      | H15A | 0.25      | H17B | 0.25      |
| H12B | 0.75      | H13B | 0.25      | H15B | 0.25      |      |           |
| C18  | 0.25      | H13C | 0.25      | C16  | 0.25      |      |           |
| H18A | 0.25      | C14  | 0.25      | H16A | 0.25      |      |           |

## Crystal Data and Experimental

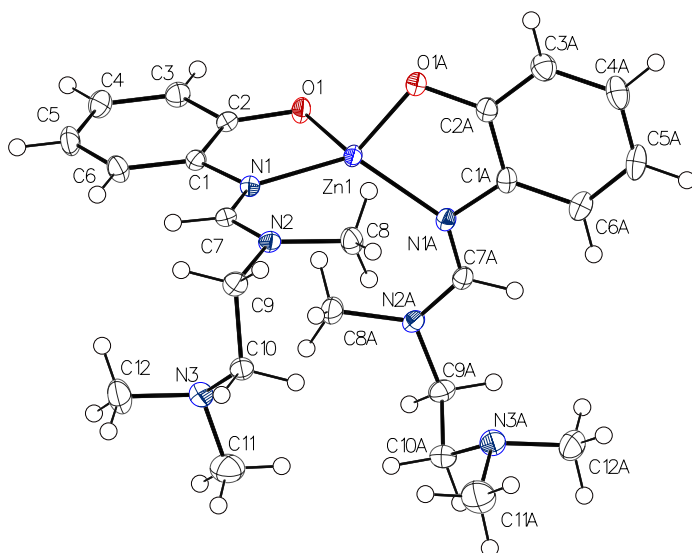

**Figure S137:** ORTEP view of compound **6d**

**Experimental.** Single clear light colourless needle-shaped crystals of **compound 6d** recrystallised from a mixture of DCM and cyclohexane by slow evaporation. A suitable crystal with dimensions 0.80 x 0.15 x 0.12 mm<sup>3</sup> was selected and mounted on a MITIGEN holder oil on a Nonius APEX-II CCD diffractometer. The crystal was kept at a steady  $T = 110.0(1)$  K during data collection. The structure was solved with the **ShelXT**<sup>1</sup> solution program using dual methods and by using **Olex2**<sup>2</sup> 1.5 as the graphical interface. The model was refined with **ShelXL**<sup>3</sup> 2018/3 using full matrix least squares minimisation on  $F^2$ .

**Crystal Data.** C<sub>24</sub>H<sub>36</sub>N<sub>6</sub>O<sub>2</sub>Zn,  $M_r = 505.96$ , triclinic,  $P-1$  (No. 2),  $a = 10.6168(3)$  Å,  $b = 11.2860(4)$  Å,  $c = 11.5396(4)$  Å,  $\alpha = 75.743(2)^\circ$ ,  $\beta = 89.755(2)^\circ$ ,  $\gamma = 71.855(2)^\circ$ ,  $V = 1269.52(7)$  Å<sup>3</sup>,  $T = 110.0(1)$  K,  $Z = 2$ ,  $Z' = 1$ ,  $\mu(\text{Mo } K\alpha_1) = 0.999$ , 86013 reflections measured, 5840 unique ( $R_{\text{int}} = 0.0553$ ) which were used in all calculations. The final  $wR_2$  was 0.0655 (all data) and  $R_1$  was 0.0259 ( $I \geq 2 \sigma(I)$ ).

**Table S90: Experimental parameters**

| Compound                              | <b>6d</b>                                                        |
|---------------------------------------|------------------------------------------------------------------|
| CCDC                                  | <b>2182086</b>                                                   |
| Formula                               | C <sub>24</sub> H <sub>36</sub> N <sub>6</sub> O <sub>2</sub> Zn |
| $D_{\text{calc.}} / \text{g cm}^{-3}$ | 1.324                                                            |
| $\mu / \text{mm}^{-1}$                | 0.999                                                            |
| Formula Weight                        | 505.96                                                           |
| Colour                                | clear light colourless                                           |
| Shape                                 | needle-shaped                                                    |
| Size/mm <sup>3</sup>                  | 0.80x0.15x0.12                                                   |
| $T / \text{K}$                        | 110.0(1)                                                         |
| Crystal System                        | triclinic                                                        |
| Space Group                           | $P-1$                                                            |
| $a / \text{Å}$                        | 10.6168(3)                                                       |
| $b / \text{Å}$                        | 11.2860(4)                                                       |
| $c / \text{Å}$                        | 11.5396(4)                                                       |
| $\alpha / ^\circ$                     | 75.743(2)                                                        |
| $\beta / ^\circ$                      | 89.755(2)                                                        |
| $\gamma / ^\circ$                     | 71.855(2)                                                        |
| $V / \text{Å}^3$                      | 1269.52(7)                                                       |
| $Z$                                   | 2                                                                |
| $Z'$                                  | 1                                                                |
| Wavelength/Å                          | 0.71073                                                          |
| Radiation type                        | Mo $K\alpha_1$                                                   |
| $\theta_{\text{min}} / ^\circ$        | 2.313                                                            |
| $\theta_{\text{max}} / ^\circ$        | 27.576                                                           |
| Measured Refl's.                      | 86013                                                            |
| Indep't Refl's                        | 5840                                                             |
| Refl's $I \geq 2 \sigma(I)$           | 4799                                                             |
| $R_{\text{int}}$                      | 0.0553                                                           |
| Parameters                            | 304                                                              |
| Restraints                            | 0                                                                |
| Largest Peak                          | 0.357                                                            |
| Deepest Hole                          | -0.304                                                           |
| GooF                                  | 1.038                                                            |
| $wR_2$ (all data)                     | 0.0655                                                           |
| $wR_2$                                | 0.0589                                                           |
| $R_1$ (all data)                      | 0.0408                                                           |
| $R_1$                                 | 0.0259                                                           |

**Table S91: Structure Quality Indicators**

|                     |                                 |        |                 |      |          |       |            |       |
|---------------------|---------------------------------|--------|-----------------|------|----------|-------|------------|-------|
| <b>Reflections:</b> | d min (Mo)<br>2 $\theta$ =55.2° | 0.77   | I/ $\sigma$ (I) | 40.1 | Rint     | 5.53% | Full 50.5° | 99.9  |
| <b>Refinement:</b>  | Shift                           | -0.002 | Max Peak        | 0.4  | Min Peak | -0.3  | Goof       | 1.038 |

A clear light colourless needle-shaped crystal with dimensions 0.80 x 0.15 x 0.12 mm<sup>3</sup> was mounted on a MITIGEN holder oil. Data were collected using a Nonius APEX-II CCD diffractometer operating at  $T = 110.0(1)$  K. Data were measured using  $\phi$  and  $\omega$  scans with Mo  $K_{\alpha 1}$  radiation. The diffraction pattern was indexed and the total number of runs, and images was based on the strategy calculation from the program **APEX4**<sup>6</sup>. The maximum resolution that was achieved was  $\theta = 27.576^\circ$  (0.77 Å). The unit cell was refined using **SAINT V8.40B**<sup>4</sup> on 9904 reflections, 12% of the observed reflections. Data reduction, scaling and absorption corrections were performed using **SAINT V8.40B**<sup>4</sup>. The final completeness is 99.90 % out to  $27.576^\circ$  in  $\theta$ . **SADABS-2016/2**<sup>5</sup> was used for absorption correction.  $wR_2(\text{int})$  was 0.0663 before and 0.0530 after correction. The Ratio of minimum to maximum transmission is 0.8031. The absorption coefficient  $\mu$  of this material is 0.999 mm<sup>-1</sup> at this wavelength ( $\lambda = 0.71073\text{Å}$ ) and the minimum and maximum transmissions are 0.644 and 0.801. The structure was solved, and the space group  $P-1$  (# 2) determined by the **ShelXT**<sup>1</sup> structure solution program using dual methods and refined by full matrix least squares minimisation on  $F^2$  using version 2018/3 of **ShelXL**<sup>3</sup> 2018/3. All non-hydrogen atoms were refined anisotropically. Hydrogen atom positions were calculated geometrically and refined using the riding model. There is a single molecule in the asymmetric unit, which is represented by the reported sum formula. In other words: Z is 2 and Z' is 1.

**Table S92: Bond Lengths in Å for compound 6d.**

| Atom | Atom | Length/Å   | Atom | Atom | Length/Å |
|------|------|------------|------|------|----------|
| Zn1  | O1   | 1.9337(11) | N3   | C12  | 1.459(2) |
| Zn1  | O1A  | 1.9370(11) | N3A  | C10A | 1.458(2) |
| Zn1  | N1   | 2.0172(12) | N3A  | C11A | 1.462(2) |
| Zn1  | N1A  | 2.0072(13) | N3A  | C12A | 1.457(2) |
| O1   | C2   | 1.3278(18) | C1   | C2   | 1.422(2) |
| O1A  | C2A  | 1.3342(18) | C1   | C6   | 1.388(2) |
| N1   | C1   | 1.4326(19) | C1A  | C2A  | 1.418(2) |
| N1   | C7   | 1.305(2)   | C1A  | C6A  | 1.394(2) |
| N1A  | C1A  | 1.4390(19) | C2   | C3   | 1.401(2) |
| N1A  | C7A  | 1.309(2)   | C2A  | C3A  | 1.397(2) |
| N2   | C7   | 1.3289(19) | C3   | C4   | 1.386(2) |
| N2   | C8   | 1.453(2)   | C3A  | C4A  | 1.387(2) |
| N2   | C9   | 1.4621(19) | C4   | C5   | 1.384(2) |
| N2A  | C7A  | 1.328(2)   | C4A  | C5A  | 1.386(3) |
| N2A  | C8A  | 1.457(2)   | C5   | C6   | 1.390(2) |
| N2A  | C9A  | 1.463(2)   | C5A  | C6A  | 1.388(2) |
| N3   | C10  | 1.458(2)   | C9   | C10  | 1.520(2) |
| N3   | C11  | 1.455(2)   | C9A  | C10A | 1.523(2) |

**Table S93: Bond Angles in ° for compound 6d.**

| Atom | Atom | Atom | Angle/°   | Atom | Atom | Atom | Angle/°    |
|------|------|------|-----------|------|------|------|------------|
| O1   | Zn1  | O1A  | 112.07(5) | C2   | O1   | Zn1  | 110.35(9)  |
| O1   | Zn1  | N1   | 86.72(5)  | C2A  | O1A  | Zn1  | 110.06(9)  |
| O1   | Zn1  | N1A  | 122.65(5) | C1   | N1   | Zn1  | 107.00(9)  |
| O1A  | Zn1  | N1   | 122.19(5) | C7   | N1   | Zn1  | 133.65(10) |
| O1A  | Zn1  | N1A  | 87.14(5)  | C7   | N1   | C1   | 119.12(12) |
| N1A  | Zn1  | N1   | 128.83(5) | C1A  | N1A  | Zn1  | 106.79(9)  |

| Atom | Atom | Atom | Angle/°    | Atom | Atom | Atom | Angle/°    |
|------|------|------|------------|------|------|------|------------|
| C7A  | N1A  | Zn1  | 133.90(11) | O1   | C2   | C1   | 120.91(13) |
| C7A  | N1A  | C1A  | 118.21(13) | O1   | C2   | C3   | 120.83(14) |
| C7   | N2   | C8   | 122.78(13) | C3   | C2   | C1   | 118.25(14) |
| C7   | N2   | C9   | 119.00(13) | O1A  | C2A  | C1A  | 120.66(14) |
| C8   | N2   | C9   | 117.29(12) | O1A  | C2A  | C3A  | 120.94(15) |
| C7A  | N2A  | C8A  | 122.71(13) | C3A  | C2A  | C1A  | 118.39(14) |
| C7A  | N2A  | C9A  | 117.89(13) | C4   | C3   | C2   | 121.37(15) |
| C8A  | N2A  | C9A  | 118.31(13) | C4A  | C3A  | C2A  | 121.39(16) |
| C10  | N3   | C12  | 111.34(14) | C5   | C4   | C3   | 119.89(15) |
| C11  | N3   | C10  | 111.52(14) | C5A  | C4A  | C3A  | 119.85(16) |
| C11  | N3   | C12  | 110.12(15) | C4   | C5   | C6   | 119.95(15) |
| C10A | N3A  | C11A | 110.97(14) | C4A  | C5A  | C6A  | 119.97(16) |
| C12A | N3A  | C10A | 111.88(15) | C1   | C6   | C5   | 121.02(15) |
| C12A | N3A  | C11A | 109.57(15) | C5A  | C6A  | C1A  | 120.85(16) |
| C2   | C1   | N1   | 114.97(13) | N1   | C7   | N2   | 125.43(14) |
| C6   | C1   | N1   | 125.51(14) | N1A  | C7A  | N2A  | 125.87(14) |
| C6   | C1   | C2   | 119.52(14) | N2   | C9   | C10  | 111.96(13) |
| C2A  | C1A  | N1A  | 115.34(13) | N2A  | C9A  | C10A | 112.35(13) |
| C6A  | C1A  | N1A  | 125.17(15) | N3   | C10  | C9   | 112.35(13) |
| C6A  | C1A  | C2A  | 119.49(15) | N3A  | C10A | C9A  | 112.59(14) |

**Table S94:** Torsion Angles in ° for **compound 6d**.

| Atom | Atom | Atom | Atom | Angle/°     |
|------|------|------|------|-------------|
| Zn1  | O1   | C2   | C1   | 2.37(17)    |
| Zn1  | O1   | C2   | C3   | -179.10(12) |
| Zn1  | O1A  | C2A  | C1A  | 0.30(17)    |
| Zn1  | O1A  | C2A  | C3A  | 179.13(12)  |
| Zn1  | N1   | C1   | C2   | -0.10(15)   |
| Zn1  | N1   | C1   | C6   | -179.48(13) |
| Zn1  | N1   | C7   | N2   | -4.4(2)     |
| Zn1  | N1A  | C1A  | C2A  | -1.08(15)   |
| Zn1  | N1A  | C1A  | C6A  | 178.64(13)  |
| Zn1  | N1A  | C7A  | N2A  | -15.2(2)    |
| O1   | C2   | C3   | C4   | -177.86(15) |
| O1A  | C2A  | C3A  | C4A  | -178.58(15) |
| N1   | C1   | C2   | O1   | -1.5(2)     |
| N1   | C1   | C2   | C3   | 179.88(14)  |
| N1   | C1   | C6   | C5   | 179.51(15)  |
| N1A  | C1A  | C2A  | O1A  | 0.6(2)      |
| N1A  | C1A  | C2A  | C3A  | -178.28(13) |
| N1A  | C1A  | C6A  | C5A  | 177.43(15)  |
| N2   | C9   | C10  | N3   | -63.33(17)  |
| N2A  | C9A  | C10A | N3A  | -61.44(19)  |
| C1   | N1   | C7   | N2   | -177.99(14) |
| C1   | C2   | C3   | C4   | 0.7(2)      |
| C1A  | N1A  | C7A  | N2A  | 178.61(14)  |
| C1A  | C2A  | C3A  | C4A  | 0.3(2)      |
| C2   | C1   | C6   | C5   | 0.2(2)      |
| C2   | C3   | C4   | C5   | -0.2(3)     |
| C2A  | C1A  | C6A  | C5A  | -2.9(2)     |
| C2A  | C3A  | C4A  | C5A  | -1.7(3)     |
| C3   | C4   | C5   | C6   | -0.4(3)     |
| C3A  | C4A  | C5A  | C6A  | 0.8(3)      |
| C4   | C5   | C6   | C1   | 0.4(3)      |
| C4A  | C5A  | C6A  | C1A  | 1.4(3)      |
| C6   | C1   | C2   | O1   | 177.87(14)  |
| C6   | C1   | C2   | C3   | -0.7(2)     |
| C6A  | C1A  | C2A  | O1A  | -179.17(14) |



| Atom | Atom | Atom | Atom | Angle/°     |
|------|------|------|------|-------------|
| C6A  | C1A  | C2A  | C3A  | 2.0(2)      |
| C7   | N1   | C1   | C2   | 175.07(13)  |
| C7   | N1   | C1   | C6   | -4.3(2)     |
| C7   | N2   | C9   | C10  | 96.29(16)   |
| C7A  | N1A  | C1A  | C2A  | 168.57(14)  |
| C7A  | N1A  | C1A  | C6A  | -11.7(2)    |
| C7A  | N2A  | C9A  | C10A | 85.72(17)   |
| C8   | N2   | C7   | N1   | -3.7(2)     |
| C8   | N2   | C9   | C10  | -72.95(17)  |
| C8A  | N2A  | C7A  | N1A  | -2.8(2)     |
| C8A  | N2A  | C9A  | C10A | -82.71(18)  |
| C9   | N2   | C7   | N1   | -172.27(14) |
| C9A  | N2A  | C7A  | N1A  | -170.65(14) |
| C11  | N3   | C10  | C9   | 160.91(14)  |
| C11A | N3A  | C10A | C9A  | 165.69(15)  |
| C12  | N3   | C10  | C9   | -75.65(17)  |
| C12A | N3A  | C10A | C9A  | -71.59(18)  |

**Table S95:** Continuous shape measure values SQ(P) calculated for the coordination polyhedra found in the crystal structures of complexes **1a**, **1b**, **1b'**, **2**, and **3b**.

| ML5 structure | PP-5-D5h-Pentagon | vOC-5-C4v-Vacant octahedron | TBPY-5-D3h-Trigonal bipyramid | SPY-5-C4v-Spherical square pyramid | JTBPY-5-D3h-Johnson trigonal bipyramid J12 |
|---------------|-------------------|-----------------------------|-------------------------------|------------------------------------|--------------------------------------------|
| <b>1a</b>     | 33.899            | 7.322                       | <b>2.015</b>                  | 4.462                              | 4.006                                      |
| <b>1b</b>     | 33.873            | 7.198                       | <b>1.348</b>                  | 4.402                              | 2.062                                      |
| <b>1b'</b>    | 32.956            | 5.552                       | <b>1.055</b>                  | 3.908                              | 1.436                                      |
| <b>2b</b>     | 33.393            | 4.916                       | 2.204                         | <b>2.180</b>                       | 3.180                                      |
| <b>3b</b>     | 34.054            | 4.678                       | 3.062                         | <b>1.812</b>                       | 3.830                                      |

Bold-faced numbers correspond to the lowest SQ(P) values calculated by the SHAPE 2.1 program<sup>11</sup>

### Citations

- 1) Sheldrick, G.M., **ShelXT**-Integrated space-group and crystal-structure determination, *Acta Cryst.*, (2015), **A71**, 3-8.
- 2) O.V. Dolomanov and L.J. Bourhis and R.J. Gildea and J.A.K. Howard and H. Puschmann, **Olex2: A complete structure solution, refinement and analysis program**, *J. Appl. Cryst.*, (2009), **42**, 339-341.
- 3) Sheldrick, G.M., Crystal structure refinement with **ShelXL**, *Acta Cryst.*, (2015), **C71**, 3-8.
- 4) Bruker, **SAINT V8.40B**. Software for the Integration of CCD Detector System Bruker Analytical X-ray Systems, Bruker AXS Inc., Madison, Wisconsin, USA (2021).
- 5) Bruker, **SADABS-2016/2**. Bruker AXS Inc., Madison, Wisconsin, USA (2016).
- 6) Bruker, **APEX4**. Bruker AXS Inc., Madison, Wisconsin, USA (2021).
- 7) Bruker, **APEX3**. Bruker AXS Inc., Madison, Wisconsin, USA (2015).
- 8) Bruker, **SAINT V8.40A**. Software for the Integration of CCD Detector System Bruker Analytical X-ray Systems, Bruker AXS Inc., Madison, Wisconsin, USA (2016).
- 9) Sheldrick, G.M, TWINABS: scaling program for twinned crystals (version 2012/1) Bruker, Madison, Wisconsin, USA 2012.
- 10) Sheldrick, G.M, CELL\_NOW: program for unit cell determination Bruker, Madison, Wisconsin, USA 2008.
- 11) Pinsky, M.; Avnir, D. Continuous Symmetry Measures. 5. The Classical Polyhedra. *Inorganic Chemistry* (1998), **37**, 5575–5582.
